# Supplementary material for: Generation of potent antibacterial compounds through enzymatic and chemical modifications of the trans-δ-viniferin scaffold
Source: PubMed Central journal article supplement (PMC10520035; doi:10.1038/s41598-023-43000-5), 2023-09-25
Supplement: 41598_2023_43000_MOESM1_ESM.pdf [file 41598_2023_43000_MOESM1_ESM.pdf]

# ***Generation of potent antibacterial compounds through enzymatic and chemical modifications of the trans- $\delta$ -viniferin scaffold***

**Robin Huber,<sup>1,2</sup> Laurence Marcourt,<sup>1,2</sup> Margaux H ritier,<sup>1,2</sup> Alexandre Luscher,<sup>3</sup> Laurie Guebey,<sup>3</sup> Sylvain Schnee,<sup>4</sup> Emilie Michellod,<sup>4</sup> St phane Guerrier,<sup>1,2,5</sup> Jean-Luc Wolfender,<sup>1,2</sup> Leonardo Scapozza,<sup>1,2</sup> Thilo K hler,<sup>3</sup> Katia Gindro,<sup>4†\*</sup> and Emerson Ferreira Queiroz.<sup>1,2†\*</sup>**

<sup>1</sup> School of Pharmaceutical Sciences, University of Geneva, CMU, Geneva, Switzerland

<sup>2</sup> Institute of Pharmaceutical Sciences of Western Switzerland, University of Geneva, CMU, Geneva, Switzerland

<sup>3</sup> Department of Microbiology and Molecular Medicine, University of Geneva, Rue Michel-Servet 1, CH-1211 Gen ve 4, Switzerland

<sup>4</sup> Agroscope, Plant Protection Research Division, Mycology Group, Route de Duillier 50, P.O. Box 1012, 1260 Nyon, Switzerland

<sup>5</sup> University of Geneva, Geneva School of Economics and Management, Geneva 1205, Switzerland

†These authors have contributed equally to this work and share last authorship,

\*Corresponding authors: Emerson Ferreira Queiroz ([emerson.ferreira@unige.ch](mailto:emerson.ferreira@unige.ch)), Katia Gindro ([katia.gindro@agroscope.admin.ch](mailto:katia.gindro@agroscope.admin.ch))

## ***Supplementary Material***

|                                                                                               |    |
|-----------------------------------------------------------------------------------------------|----|
| Supplementary methods .....                                                                   | 2  |
| Benzofuran derivatives synthesis (compounds 16-19).....                                       | 2  |
| Bromination reactions (scale-up and isolation, compounds 20, 21, 26, 27, 33, 40 and 41).....  | 6  |
| Chlorination reactions (scale-up and isolation, compounds 22, 23, 28-30, 34-37 and 42) .....  | 7  |
| Iodination reactions (scale-up and isolation, compounds 24, 25, 31, 32, 38, 39, 43, 44) ..... | 7  |
| Supplementary Figures and Tables.....                                                         | 9  |
| NMR Data.....                                                                                 | 24 |

## Supplementary methods

### Benzofuran derivatives synthesis (compounds 16-19)

To a solution of **1** (16.8 mg, 0.037 mmol, 1 eq) in DCM (5 mL) and DMSO (0.4 mL) were added Ac<sub>2</sub>O (23  $\mu$ L, 0.24 mmol, 6.6 eq) and TEA (76  $\mu$ L, 0.54 mmol, 14.7 eq) and the mixture was stirred at room temperature overnight. Solvent was evaporated by rotary evaporation and the residue was solubilized in EtOAc (5 mL) and washed with H<sub>2</sub>O (5 mL). The aqueous phase was extracted with EtOAc (2  $\times$  5 mL). The combined organic layers were washed with water (10 mL), and dried under nitrogen (23.6 mg). The crude reaction mixture was analyzed by UHPLC-PDA-ELSD-MS. The purity of **1-Ac** was good enough to use it without purification for the next step. The crude reaction mixture containing **1-Ac** (22.6 mg, 0.034 mmol, 1 eq) was solubilized, under argon in dry toluene (10 mL) at room temperature. DDQ (77 mg, 0.34 mmol, 10 eq) was added and the mixture was heated at 80 °C. The reaction was monitored by UHPLC-PDA-ELSD-MS until consumption of the starting material (about 23h). The crude reaction mixture was directly purified by flash chromatography using a Scorpius C18e-HP column (125  $\times$  28 mm i.d., 30  $\mu$ m; BGB) at 25 ml/min, 40°C with H<sub>2</sub>O (A) and MeOH (B) both containing 0.1% formic acid as solvents. A generic gradient was used (5 to 100% MeOH in 160 min). The targeted product **1-Ac-Ox** was collected (6.3 mg,  $t_R$  = 57 min). To a solution of **1-Ac-Ox** (5.2 mg, 0.0078 mmol, 1 eq) in MeOH (1 mL) at 0 °C was added KOH (4.4 mg, 0.078 mmol, 10 eq). The mixture was stirred for 2h at 0 °C, and then acidified with HCl 0.1 M until pH 1 was reached. MeOH was removed by rotary evaporation. 5 mL H<sub>2</sub>O were added and extracted with EtOAc (3  $\times$  10 mL). The combined organic layers were washed with water (10 mL), and dried under nitrogen, giving the targeted compound **16** (3.9 mg) without further purification.

**1-Ac**: <sup>1</sup>H NMR (DMSO-*d*<sub>6</sub>, 600 MHz)  $\delta$  2.24 (6H, s), 2.27 (9H, s), 4.80 (1H, d,  $J$  = 7.3 Hz), 5.74 (1H, d,  $J$  = 7.3 Hz), 6.84 (1H, t,  $J$  = 2.1 Hz), 6.98 (3H, m), 7.02 (1H, d,  $J$  = 8.4 Hz), 7.04 (1H, d,  $J$  = 16.3 Hz), 7.15 (2H, d,  $J$  = 8.6 Hz), 7.22 (2H, d,  $J$  = 2.1 Hz), 7.27 (1H, s), 7.28 (1H, d,  $J$  = 16.3 Hz), 7.42 (2H, d,  $J$  = 8.6 Hz), 7.50 (1H, dd,  $J$  = 8.4, 1.8 Hz); HR-ESI/MS analysis:  $m/z$  665.2024 [M+H]<sup>+</sup>, (calcd for C<sub>38</sub>H<sub>33</sub>O<sub>11</sub><sup>+</sup>, 665.2017,  $\Delta$  = 1.0 ppm).

**1-Ac-Ox**: <sup>1</sup>H NMR (DMSO-*d*<sub>6</sub>, 600 MHz)  $\delta$  2.28, 2.28, 2.29 (15H, 3 s), 6.88 (1H, t,  $J$  = 2.1 Hz), 7.15 (1H, t,  $J$  = 2.1 Hz), 7.20 (2H, d,  $J$  = 8.8 Hz), 7.24 (3H, m), 7.30 (2H, d,  $J$  = 2.1 Hz), 7.47 (1H, d,  $J$  = 16.3 Hz), 7.66 (3H, m), 7.73 (2H, d,  $J$  = 1.5 Hz); HR-ESI/MS analysis:  $m/z$  663.1852 [M+H]<sup>+</sup>, (calcd for C<sub>38</sub>H<sub>31</sub>O<sub>11</sub><sup>+</sup>, 663.1861,  $\Delta$  = 1.3 ppm).

dehydro-*trans*- $\delta$ -viniferin (**16**): UV (MeOH)  $\lambda_{max}$  (log  $\epsilon$ ) 307 (4.34) nm; <sup>1</sup>H NMR (DMSO-*d*<sub>6</sub>, 600 MHz)  $\delta$  6.14 (1H, t,  $J$  = 2.1 Hz, H-12), 6.27 (1H, t,  $J$  = 2.2 Hz, H-12'), 6.32 (2H, d,  $J$  = 2.2 Hz, H-10', H-14'), 6.44 (2H, d,  $J$  = 2.1 Hz, H-10, H-14), 6.79 (2H, d,  $J$  = 8.7 Hz, H-3', H-5'), 6.98 (1H, d,  $J$  = 16.3 Hz, H-8), 7.16 (1H, d,  $J$  = 16.3 Hz, H-7), 7.47 (2H, d,  $J$  = 8.7 Hz, H-2', H-6'), 7.53 (1H, s, H-2), 7.59 (2H, m, H-5, H-6), 9.22 (2H, s, 11OH, 13OH), 9.41 (2H, s, 11'OH, 13'OH), 9.86 (1H, s, 4'OH); <sup>13</sup>C NMR (DMSO, 151 MHz)  $\delta$  102.1 (C-12, C-12'), 104.6 (C-10, C-14), 107.3 (C-10', C-14'), 111.2 (C-5), 115.3 (C-8'), 115.6 (C-3', C-5'), 117.5 (C-2), 120.7 (C-1'), 123.0 (C-6), 127.9 (C-8), 128.2 (C-7),

128.3 (C-2', C-6'), 130.2 (C-3), 132.5 (C-1), 133.7 (C-9'), 139.0 (C-9), 150.9 (C-7'), 152.7 (C-4), 158.1 (C-4'), 158.5 (C-11, C-13), 159.0 (C-11', C-13'); HR-ESI/MS analysis:  $m/z$  451.1175 [M - H]<sup>-</sup>, (calcd for C<sub>28</sub>H<sub>19</sub>O<sub>6</sub><sup>-</sup>, 451.1187,  $\Delta$  = 2.7 ppm). MS/MS spectrum: CCMSLIB00010129247. SMILES: OC1=CC=C(C(O2)=C(C3=CC(O)=CC(O)=C3)C4=C2C=CC(/C=C/C5=CC(O)=CC(O)=C5)=C4)C=C1.

To a solution of **2** (16.9 mg, 0.035 mmol, 1 eq) in DCM (5 mL) and DMSO (0.4 mL) were added Ac<sub>2</sub>O (21.8  $\mu$ L, 0.23 mmol, 6.6 eq) and TEA (72  $\mu$ L, 0.51 mmol, 14.7 eq) and the mixture was stirred at room temperature overnight. Solvent was evaporated by rotary evaporation and the residue was solubilized in EtOAc (5 mL) and washed with H<sub>2</sub>O (5 mL). The aqueous phase was extracted with EtOAc (2  $\times$  5 mL). The combined organic layers were washed with water (10 mL), and dried under nitrogen (22.8 mg). The crude reaction mixture was analyzed by UHPLC-PDA-ELSD-MS. The purity of **2-Ac** was good enough to use it without purification for the next step. The crude reaction mixture containing **2-Ac** (22.8 mg, 0.0375 mmol, 1 eq) was solubilized, under argon in dry toluene (10 mL) at room temperature. DDQ (83 mg, 0.36 mmol, 10 eq) was added and the mixture was heated at 80 °C. The reaction was monitored by UHPLC-PDA-ELSD-MS until consumption of the starting material (about 16h). The crude reaction mixture was directly purified by flash chromatography using a Scorpius C18e-HP column (125  $\times$  28 mm i.d., 30  $\mu$ m; BGB) at 25 ml/min, 40°C with H<sub>2</sub>O (A) and MeOH (B) both containing 0.1% formic acid as solvents. A generic gradient was used (5 to 100% MeOH in 160 min). The targeted product **2-Ac-Ox** was collected (8.8 mg,  $t_R$  = 59 min). To a solution of **2-Ac-Ox** (7.8 mg, 0.013 mmol, 1 eq) in MeOH (1 mL) at 0 °C was added KOH (7.2 mg, 0.128 mmol, 10 eq). The mixture was stirred for 2h at 0 °C, and then acidified with HCl 0.1 M until pH 1 was reached. MeOH was removed by rotary evaporation. 5 mL H<sub>2</sub>O were added and extracted with EtOAc (3  $\times$  10 mL). The combined organic layers were washed with water (10 mL), and dried under nitrogen, giving the targeted compound **17** (5.6 mg) without further purification.

**2-Ac**: <sup>1</sup>H NMR (DMSO-*d*<sub>6</sub>, 600 MHz)  $\delta$  2.27 (9H, s), 3.71 (6H, s), 4.64 (1H, d,  $J$  = 7.9 Hz), 5.77 (1H, d,  $J$  = 7.9 Hz), 6.42 (2H, d,  $J$  = 2.2 Hz), 6.44 (1H, t,  $J$  = 2.2 Hz), 6.83 (1H, t,  $J$  = 2.1 Hz), 6.99 (1H, d,  $J$  = 8.3 Hz), 7.03 (1H, d,  $J$  = 16.4 Hz), 7.15 (2H, d,  $J$  = 8.6 Hz), 7.22 (2H, d,  $J$  = 2.1 Hz), 7.24 (1H, d,  $J$  = 1.6 Hz), 7.27 (1H, d,  $J$  = 16.5 Hz), 7.42 (2H, d,  $J$  = 8.6 Hz), 7.48 (1H, dd,  $J$  = 8.3, 1.6 Hz); HR-ESI/MS analysis:  $m/z$  609.2130 [M+H]<sup>+</sup>, (calcd for C<sub>36</sub>H<sub>33</sub>O<sub>9</sub><sup>+</sup>, 609.2119,  $\Delta$  = 1.8 ppm).

**2-Ac-Ox**: <sup>1</sup>H NMR (DMSO-*d*<sub>6</sub>, 600 MHz)  $\delta$  2.28 (3H, s), 2.28 (6H, s), 3.76 (6H, s), 6.62 (1H, t,  $J$  = 2.3 Hz), 6.64 (2H, d,  $J$  = 2.2 Hz), 6.88 (1H, t,  $J$  = 2.1 Hz), 7.22 (3H, m), 7.31 (2H, d,  $J$  = 2.1 Hz), 7.49 (1H, d,  $J$  = 16.3 Hz), 7.66 (3H, m), 7.72 (2H, m); HR-ESI/MS analysis:  $m/z$  607.1956 [M+H]<sup>+</sup>, (calcd for C<sub>36</sub>H<sub>31</sub>O<sub>9</sub><sup>+</sup>, 607.1963,  $\Delta$  = 1.1 ppm).

11',13'-di-*O*-methyl-dehydro-*trans*- $\delta$ -viniferin (**17**): UV (MeOH)  $\lambda_{max}$  (log  $\epsilon$ ) 306 (4.51) nm; <sup>1</sup>H NMR (DMSO-*d*<sub>6</sub>, 600 MHz)  $\delta$  3.76 (6H, s, CH<sub>3</sub>O-11', CH<sub>3</sub>O-13'), 6.15 (1H, t,  $J$  = 2.1 Hz, H-12), 6.44 (2H, d,  $J$  = 2.1 Hz, H-10, H-14), 6.59 (1H, t,  $J$  = 2.3 Hz, H-12'), 6.61 (2H, d,  $J$  = 2.3 Hz, H-10', H-14'), 6.79 (2H, d,  $J$  = 8.7 Hz, H-3', H-5'), 7.00 (1H, d,  $J$  = 16.3 Hz, H-8), 7.18 (1H, d,  $J$  = 16.3 Hz, H-7), 7.45 (2H, d,  $J$  = 8.7 Hz, H-2', H-6'), 7.57 (1H, d,  $J$  = 1.6 Hz, H-2), 7.61 (1H, d,  $J$  = 8.6 Hz, H-5), 7.63 (1H, dd,  $J$  = 8.6, 1.6 Hz, H-6), 9.22 (2H, s, 11OH, 13OH), 9.89 (1H, s, 4'OH); <sup>13</sup>C NMR (DMSO-*d*<sub>6</sub>, 151

MHz)  $\delta$  55.3 (CH<sub>3</sub>O-11', CH<sub>3</sub>O-13'), 99.8 (C-12'), 102.1 (C-12), 104.7 (C-10, C-14), 107.4 (C-10', C-14'), 111.2 (C-5), 115.0 (C-8'), 115.6 (C-3', C-5'), 117.7 (C-2), 120.5 (C-1'), 122.9 (C-6), 127.9 (C-8), 128.3 (C-7), 128.4 (C-2', C-6'), 130.0 (C-3), 132.7 (C-1), 134.1 (C-9'), 139.0 (C-9), 151.3 (C-7'), 152.7 (C-4), 158.2 (C-4'), 158.5 (C-11, C-13), 161.0 (C-11', C-13'); HR-ESI/MS analysis:  $m/z$  479.1490 [M - H]<sup>-</sup>, (calcd for C<sub>30</sub>H<sub>23</sub>O<sub>6</sub><sup>-</sup>, 479.1500,  $\Delta$  = 2.1 ppm). MS/MS spectrum: CCMSLIB00010129248.

SMILES:

OC1=CC=C(C(O2)=C(C3=CC(OC)=CC(OC)=C3)C4=C2C=CC(/C=C/C5=CC(O)=CC(O)=C5)=C4)C=C1.

To a solution of **3** (17.0 mg, 0.035 mmol, 1 eq) in DCM (5 mL) and DMSO (0.4 mL) were added Ac<sub>2</sub>O (22  $\mu$ L, 0.23 mmol, 6.6 eq) and TEA (72  $\mu$ L, 0.51 mmol, 14.7 eq) and the mixture was stirred at room temperature overnight. Solvent was evaporated by rotary evaporation and the residue was solubilized in EtOAc (5 mL) and washed with H<sub>2</sub>O (5 mL). The aqueous phase was extracted with EtOAc (2  $\times$  5 mL). The combined organic layers were washed with water (10 mL), and dried under nitrogen (26.1 mg). The crude reaction mixture was analyzed by UHPLC-PDA-ELSD-MS. The purity was good enough to use it without purification for the next step. The crude reaction mixture containing **3-Ac** (25 mg, 0.041 mmol, 1 eq) was solubilized, under argon in dry toluene (10 mL) at room temperature. DDQ (93 mg, 0.41 mmol, 10 eq) was added and the mixture was heated at 80 °C. The reaction was monitored by UHPLC-PDA-ELSD-MS until consumption of the starting material (about 19h). The crude reaction mixture was directly purified by flash chromatography using a Scorpius C18e-HP column (125  $\times$  28 mm i.d., 30  $\mu$ m; BGB) at 25 ml/min, 40°C with H<sub>2</sub>O (A) and MeOH (B) both containing 0.1% formic acid as solvents. A generic gradient was used (5 to 100% MeOH in 160 min). The targeted product **3-Ac-Ox** (10.7 mg,  $t_R$  = 67 min) was collected. To a solution of **3-Ac-Ox** (9.7 mg, 0.016 mmol, 1 eq) in MeOH (1 mL) at 0 °C was added KOH (9.0 mg, 0.160 mmol, 10 eq). The mixture was stirred for 2h at 0 °C, and then acidified with HCl 0.1 M until pH 1 was reached. MeOH was removed by rotary evaporation. 5 mL H<sub>2</sub>O were added and extracted with EtOAc (3  $\times$  10 mL). The combined organic layers were washed with water (10 mL), and dried under nitrogen, giving the targeted compound **18** (7.2 mg) without further purification.

**3-Ac**: <sup>1</sup>H NMR (DMSO-*d*<sub>6</sub>, 600 MHz)  $\delta$  2.24 (6H, s), 2.27 (3H, s), 3.74 (6H, s), 4.79 (1H, d,  $J$  = 7.4 Hz), 5.73 (1H, d,  $J$  = 7.4 Hz), 6.35 (1H, t,  $J$  = 2.2 Hz), 6.72 (2H, d,  $J$  = 2.2 Hz), 6.98 (4H, m), 7.01 (1H, d,  $J$  = 8.3 Hz), 7.15 (2H, d,  $J$  = 8.5 Hz), 7.25 (1H, d,  $J$  = 1.9 Hz), 7.41 (2H, d,  $J$  = 8.5 Hz), 7.50 (1H, dd,  $J$  = 8.3, 1.9 Hz); HR-ESI/MS analysis:  $m/z$  609.2125 [M+H]<sup>+</sup>, (calcd for C<sub>36</sub>H<sub>33</sub>O<sub>9</sub><sup>+</sup>, 609.2119,  $\Delta$  = 1.0 ppm).

**3-Ac-Ox**: <sup>1</sup>H NMR (DMSO-*d*<sub>6</sub>, 600 MHz)  $\delta$  2.28 (6H, s), 2.28 (3H, s), 3.77 (6H, s), 6.40 (1H, t,  $J$  = 2.2 Hz), 6.79 (2H, d,  $J$  = 2.2 Hz), 7.16 (2H, m), 7.21 (2H, d,  $J$  = 8.7 Hz), 7.25 (2H, d,  $J$  = 2.1 Hz), 7.42 (1H, d,  $J$  = 16.3 Hz), 7.64 (1H, s), 7.66 (2H, d,  $J$  = 8.7 Hz), 7.72 (2H, m); HR-ESI/MS analysis:  $m/z$  607.1953 [M+H]<sup>+</sup>, (calcd for C<sub>36</sub>H<sub>31</sub>O<sub>9</sub><sup>+</sup>, 607.1963,  $\Delta$  = 1.6 ppm).

11,13-di-*O*-methyl-dehydro-*trans*- $\delta$ -viniferin (**18**): UV (MeOH)  $\lambda_{max}$  (log  $\epsilon$ ) 306 (4.49) nm; <sup>1</sup>H NMR (DMSO-*d*<sub>6</sub>, 600 MHz)  $\delta$  3.77 (6H, s, CH<sub>3</sub>O-11, CH<sub>3</sub>O-13), 6.28 (1H, t,  $J$  = 2.2 Hz, H-12'), 6.32 (2H, d,  $J$  = 2.2 Hz, H-10', H-14'), 6.38 (1H, t,  $J$  = 2.2 Hz, H-12), 6.80 (2H, d,  $J$  = 8.6 Hz, H-3', H-5'), 6.80



(2H, d,  $J = 2.2$  Hz, H-10, H-14), 7.11 (1H, d,  $J = 16.4$  Hz, H-8), 7.41 (1H, d,  $J = 16.4$  Hz, H-7), 7.47 (2H, d,  $J = 8.6$  Hz, H-2', H-6'), 7.56 (1H, d,  $J = 1.6$  Hz, H-2), 7.61 (1H, d,  $J = 8.5$  Hz, H-5), 7.63 (1H, dd,  $J = 8.5, 1.6$  Hz, H-6), 9.42 (2H, s, 11'OH, 13'OH), 9.87 (1H, s, 4'OH);  $^{13}\text{C}$  NMR (DMSO- $d_6$ , 151 MHz)  $\delta$  55.2 (CH<sub>3</sub>O-11, CH<sub>3</sub>O-13), 99.9 (C-12), 102.1 (C-12'), 104.3 (C-10, C-14), 107.4 (C-10', C-14'), 111.3 (C-5), 115.3 (C-8'), 115.6 (C-3', C-5'), 117.8 (C-2), 120.7 (C-1'), 122.8 (C-6), 127.3 (C-8), 128.3 (C-2', C-6'), 129.3 (C-7), 130.4 (C-3), 132.4 (C-1), 133.7 (C-9'), 139.4 (C-9), 150.9 (C-7'), 152.8 (C-4), 158.1 (C-4'), 159.0 (C-11', C-13'), 160.6 (C-11, C-13); HR-ESI/MS analysis:  $m/z$  479.1489 [M - H]<sup>-</sup>, (calcd for C<sub>30</sub>H<sub>23</sub>O<sub>6</sub><sup>-</sup>, 479.1500,  $\Delta = 2.3$  ppm). MS/MS spectrum: CCMSLIB00010129249. SMILES:  
OC1=CC=C(C(O2)=C(C3=CC(O)=CC(O)=C3)C4=C2C=CC(/C=C/C5=CC(OC)=CC(OC)=C5)=C4)C=C1.

To a solution of **4** (20.0 mg, 0.04 mmol, 1 eq) in DCM (5 mL) and DMSO (0.4 mL) were added Ac<sub>2</sub>O (5.5  $\mu\text{L}$ , 0.06 mmol, 1.5 eq) and TEA (16.3  $\mu\text{L}$ , 0.12 mmol, 3 eq) and the mixture was stirred at room temperature overnight. Solvent was evaporated by rotary evaporation and the residue was solubilized in EtOAc (5 mL) and washed with H<sub>2</sub>O (5 mL). The aqueous phase was extracted with EtOAc (2  $\times$  5 mL). The combined organic layers were washed with water (10 mL), and dried under nitrogen (27.8 mg). The crude reaction mixture was analyzed by UHPLC-PDA-ELSD-MS. The purity was good enough to use it without purification for the next step. The crude reaction mixture containing **4-Ac** (10 mg, 0.018 mmol, 1 eq) was solubilized, under argon in dry toluene (10 mL) at room temperature. DDQ (41 mg, 0.18 mmol, 10 eq) was added and the mixture was heated at 80 °C. The reaction was monitored by UHPLC-PDA-ELSD-MS until consumption of the starting material (about 23h). The crude reaction mixture was directly purified by flash chromatography using a Scorpius C18e-HP column (125  $\times$  28 mm i.d., 30  $\mu\text{m}$ ; BGB) at 25 ml/min, 40°C with H<sub>2</sub>O (A) and MeOH (B) both containing 0.1% formic acid as solvents. A generic gradient was used (5 to 100% MeOH in 160 min). The targeted product **4-Ac-Ox** was collected (5.3 mg,  $t_R = 64$  min). To a solution of **4-Ac-Ox** (3.9 mg, 0.0071 mmol, 1 eq) in MeOH (1 mL) at 0 °C was added KOH (3.9 mg, 0.071 mmol, 10 eq). The mixture was stirred for 2h at 0 °C, and then acidified with HCl 0.1 M until pH 1 was reached. MeOH was removed by rotary evaporation. 5 mL H<sub>2</sub>O were added and extracted with EtOAc (3  $\times$  10 mL). The combined organic layers were washed with water (10 mL), and dried under nitrogen, giving the targeted compound **19** (3.4 mg) without further purification.

**4-Ac**:  $^1\text{H}$  NMR (DMSO- $d_6$ , 600 MHz)  $\delta$  2.27 (3H, s), 3.71 (6H, s), 3.74 (6H, s), 4.63 (1H, d,  $J = 8.0$  Hz), 5.77 (1H, d,  $J = 8.0$  Hz), 6.35 (1H, t,  $J = 2.3$  Hz), 6.42 (2H, d,  $J = 2.2$  Hz), 6.45 (1H, t,  $J = 2.2$  Hz), 6.72 (2H, d,  $J = 2.3$  Hz), 6.96 (1H, d,  $J = 16.3$  Hz), 6.98 (1H, d,  $J = 8.3$  Hz), 7.15 (2H, d,  $J = 8.7$  Hz), 7.22 (1H, d,  $J = 1.7$  Hz), 7.22 (1H, d,  $J = 16.3$  Hz), 7.41 (2H, d,  $J = 8.7$  Hz), 7.48 (1H, dd,  $J = 8.3$ ); HR-ESI/MS analysis:  $m/z$  553.2211 [M+H]<sup>+</sup>, (calcd for C<sub>34</sub>H<sub>33</sub>O<sub>7</sub><sup>+</sup>, 553.2221,  $\Delta = 1.8$  ppm).

**4-Ac-Ox**:  $^1\text{H}$  NMR (DMSO- $d_6$ , 600 MHz)  $\delta$  2.28 (3H, s), 3.76 (6H, s), 3.77 (6H, s), 6.39 (1H, t,  $J = 2.3$  Hz), 6.63 (3H, m), 6.81 (2H, d,  $J = 2.3$  Hz), 7.15 (1H, d,  $J = 16.4$  Hz), 7.21 (2H, d,  $J = 8.6$  Hz), 7.44 (1H, d,  $J = 16.4$  Hz), 7.61 (1H, d,  $J = 1.7$  Hz), 7.65 (2H, d,  $J = 8.6$  Hz), 7.69 (1H, d,  $J = 8.6$  Hz),

7.72 (1H, dd,  $J = 8.6, 1.7$  Hz); HR-ESI/MS analysis:  $m/z$  551.2056  $[M+H]^+$ , (calcd for  $C_{34}H_{31}O_7^+$ , 551.2064,  $\Delta = 1.5$  ppm).

11,11',13,13'-tetra-*O*-methyl-dehydro-*trans*- $\delta$ -viniferin (**19**): UV (MeOH)  $\lambda_{max}$  (log  $\epsilon$ ) 307 (4.51) nm;  $^1H$  NMR (DMSO- $d_6$ , 600 MHz)  $\delta$  3.76 (6H, s, CH<sub>3</sub>O-11', CH<sub>3</sub>O-13'), 3.77 (6H, s, CH<sub>3</sub>O-11, CH<sub>3</sub>O-13), 6.38 (1H, t,  $J = 2.3$  Hz, H-12), 6.60 (3H, m, H-10', H-12', H-14'), 6.79 (2H, d,  $J = 8.7$  Hz, H-3', H-5'), 6.80 (2H, d,  $J = 2.3$  Hz, H-10, H-14), 7.13 (1H, d,  $J = 16.4$  Hz, H-8), 7.42 (1H, d,  $J = 16.4$  Hz, H-7), 7.45 (2H, d,  $J = 8.7$  Hz, H-2', H-6'), 7.57 (1H, d,  $J = 1.6$  Hz, H-2), 7.63 (1H, d,  $J = 8.6$  Hz, H-5), 7.66 (1H, dd,  $J = 8.6, 1.6$  Hz, H-6), 9.88 (1H, s, 4'OH);  $^{13}C$  NMR (DMSO- $d_6$ , 151 MHz)  $\delta$  55.2 (CH<sub>3</sub>O-11, CH<sub>3</sub>O-13), 55.3 (CH<sub>3</sub>O-11', CH<sub>3</sub>O-13'), 99.7 (C-12'), 99.8 (C-12), 104.3 (C-10, C-14), 107.5 (C-10', C-14'), 111.3 (C-5), 115.0 (C-8'), 115.6 (C-3', C-5'), 117.9 (C-2), 120.5 (C-1'), 122.7 (C-6), 127.3 (C-8), 128.3 (C-2', C-6'), 129.3 (C-7), 130.2 (C-3), 132.6 (C-1), 134.1 (C-9'), 139.4 (C-9), 151.3 (C-7'), 152.8 (C-4), 158.2 (C-4'), 160.6 (C-11, C-13), 161.0 (C-11', C-13'); HR-ESI/MS analysis:  $m/z$  509.1921  $[M + H]^+$ , (calcd for  $C_{32}H_{29}O_6^+$ , 509.1959,  $\Delta = 7.2$  ppm). MS/MS spectrum: CCMSLIB00010129250.

SMILES:

OC1=CC=C(C(O2)=C(C3=CC(OC)=CC(OC)=C3)C4=C2C=CC(/C=C/C5=CC(OC)=CC(OC)=C5)=C4)C=C1.

### Bromination reactions (scale-up and isolation, compounds **20**, **21**, **26**, **27**, **33**, **40** and **41**)

10 mg **1**, **2**, **3** or **4** were solubilized in 2.6 mL of a MeCN:H<sub>2</sub>O 50:50 mixture in a 10 mL round-bottom flask. The mixture was placed at 40 °C and stirred. 1 eq. of NaBr was added, followed by 2 mL of CH<sub>3</sub>COOH and 21 eq. of H<sub>2</sub>O<sub>2</sub> added dropwise. After 4h, 8 mL of EtOAc and 8 mL of H<sub>2</sub>O were added. The organic phase was recovered and the aqueous was extracted with 2 x 3 mL of EtOAc. The combined organic layers were dried and analyzed by UHPLC-PDA-ELSD-MS. The crude reaction mixtures obtained after the bromination reactions were fractionated using semi-preparative reverse-phase chromatography. Two different stationary phases were used: C<sub>18</sub> and phenyl. The same procedure was applied to every reaction crude mixture: the separation was first optimized at the analytical level on a HP 1260 Agilent High-Performance liquid chromatography equipped with a photodiode array detector (HPLC-PDA) (Agilent technologies, Santa Clara, CA, USA). The injections were performed on a XBridge C<sub>18</sub> column (250 × 4.6 mm i.d., 5  $\mu$ m; Waters, Milford, MA, USA) or a Zorbax XDB-Phenyl column (250 × 4.6 mm i.d., 5  $\mu$ m; Agilent, Santa-Clara, CA, USA) at 1 mL/min, with H<sub>2</sub>O (A) and MeCN (B) both containing 0.1% formic acid as solvents. Once a good separation was achieved, the optimized conditions were geometrically transferred to the semi-preparative scale by using the same stationary phase (see Table S3, for each chromatographic condition). The semi-preparative injections were performed on a Shimadzu system equipped with an LC-20 A module pumps, an SPD-20 A UV/VIS, a 7725I Rheodyne® valve, and an FRC-40 fraction collector (Shimadzu, Kyoto, Japan). The injections were performed on a XBridge C<sub>18</sub> column (250 mm × 10 mm i.d., 5  $\mu$ m; Waters, Milford, MA, USA) or an Eclipse XDB-Phenyl column (250 × 9.4 mm i.d., 5  $\mu$ m; Agilent technologies, Santa Clara, CA, USA) at 4.7 mL/min (C<sub>18</sub>) and 4 mL/min (phenyl), with H<sub>2</sub>O (A) and MeCN (B) both containing 0.1% formic acid as solvents. The UV detection was set at 320 nm. The mixtures were injected on the semi-preparative HPLC column using a dry load (Queiroz et al., 2019). Fractions were collected, analyzed by UHPLC-PDA-ELSD-MS and combined according to their composition, affording compounds **20** (1.8 mg, 16% yield  $t_R = 19.0$  min), **21** (0.6 mg, 5% yield,

$t_R = 28.5$  min), **26** (2.6 mg, 24% yield,  $t_R = 25$  min), **27** (0.2 mg, 2% yield,  $t_R = 32$  min), **33** (0.4 mg, 3% yield,  $t_R = 40$  min), **40** (0.3 mg, 2% yield,  $t_R = 17.5$  min), and **41** (2.7 mg, 21% yield,  $t_R = 19$  min).

#### **Chlorination reactions (scale-up and isolation, compounds 22, 23, 28-30, 34-37 and 42)**

10 mg of **1**, **2**, **3** or **4** were solubilized in 2.6 mL of a MeCN:H<sub>2</sub>O 50:50 mixture in a 10 mL round-bottom flask. The mixture was placed at 40 °C and stirred. 100 eq. of NaCl were added, followed by 2 mL of CH<sub>3</sub>COOH and 21 eq. of H<sub>2</sub>O<sub>2</sub> added dropwise. After 6h30, 8 mL of EtOAc and 8 mL of H<sub>2</sub>O were added. The organic phase was recovered and the aqueous was extracted with 2 x 3 mL of EtOAc. The combined organic layers were dried and analyzed by UHPLC-PDA-ELSD-MS. The crude reaction mixtures obtained after the chlorination reactions were fractionated using semi-preparative reverse-phase chromatography on phenyl phase. The same procedure was applied to every reaction crude mixture: the separation was first optimized at the analytical level on a HP 1260 Agilent High-Performance liquid chromatography equipped with a photodiode array detector (HPLC-PDA) (Agilent technologies, Santa Clara, CA, USA). The injections were performed on a Zorbax XDB-Phenyl column (250 × 4.6 mm i.d., 5 μm; Agilent, Santa-Clara, CA, USA) at 1 mL/min, with H<sub>2</sub>O (A) and MeCN (B) both containing 0.1% formic acid as solvents. Once a good separation was achieved, the optimized conditions were geometrically transferred to the semi-preparative scale by using the same stationary phase (see Table S3, for each chromatographic condition). The semi-preparative injections were performed on a Shimadzu system equipped with an LC-20 A module pumps, an SPD-20 A UV/VIS, a 7725I Rheodyne® valve, and an FRC-40 fraction collector (Shimadzu, Kyoto, Japan). The injections were performed on an Eclipse XDB-Phenyl column (250 × 9.4 mm i.d., 5 μm; Agilent technologies, Santa Clara, CA, USA) at 4 mL/min, with H<sub>2</sub>O (A) and MeCN (B) both containing 0.1% formic acid as solvents. The UV detection was set at 320 nm. The mixtures were injected on the semi-preparative HPLC column using a dry load (Queiroz et al., 2019). Fractions were collected, analyzed by UHPLC-PDA-ELSD-MS and combined according to their composition, affording compounds **22** (3.1 mg, 28% yield,  $t_R = 39$  min), **23** (0.6 mg, 5% yield,  $t_R = 55$  min), **28** (3.7 mg, 34% yield,  $t_R = 36$  min), **29** (0.5 mg, 5% yield,  $t_R = 39.5$  min), **30** (0.7 mg, 6% yield,  $t_R = 47$  min), **36** (0.2 mg, 2% yield,  $t_R = 29.5$  min), **37** (1.1 mg, 8% yield,  $t_R = 33$  min), and **42** (2.4 mg, 27% yield,  $t_R = 33.5$  min).

In the case of compound **3** chlorination, the region between 25 and 28 min was collected together because the peaks were not sufficiently separated. Optimization on C<sub>18</sub> or phenyl stationary phases did not allow their separation. A pentafluorophenyl (PFP) HPLC column (ACE C<sub>18</sub>-PFP 250 x 4.6 mm i.d., 5 μm, Avantor, Radnor Township, PA, USA) was also tested, but gave similar results (data not shown). This fraction was further purified using a FCV-12AH Shimadzu recycling valve on the Shimadzu system described above. Isocratic conditions at 50% MeCN were used on an Eclipse XDB-Phenyl column (250 × 9.4 mm i.d., 5 μm; Agilent technologies, Santa Clara, CA, USA) at 4 mL/min. Peaks were collected after 14 rounds in the column allowing the isolation of **34** (0.8 mg, 6% yield,  $t_R = 267$  min) and **35** (0.8 mg, 6% yield,  $t_R = 274$  min).

#### **Iodination reactions (scale-up and isolation, compounds 24, 25, 31, 32, 38, 39, 43, 44)**

10 mg of **1**, **2**, **3** or **4** were solubilized in 2.6 mL of a MeCN:H<sub>2</sub>O 50:50 mixture in a 10 mL round-bottom flask. The mixture was placed at 40 °C and stirred. 0.5 eq. of NaI were added, followed by 2

mL of CH<sub>3</sub>COOH and 21 eq. of H<sub>2</sub>O<sub>2</sub> added dropwise. After 2h30, 8 mL of EtOAc and 8 mL of H<sub>2</sub>O were added. The organic phase was recovered and the aqueous was extracted with 2 x 3 mL of EtOAc. The combined organic layers were dried and analyzed by UHPLC-PDA-ELSD-MS. The crude reaction mixtures obtained after the iodination reactions were fractionated using semi-preparative reverse-phase chromatography on phenyl phase. The same procedure was applied to every reaction crude mixture: the separation was first optimized at the analytical level on a HP 1260 Agilent High-Performance liquid chromatography equipped with a photodiode array detector (HPLC-PDA) (Agilent technologies, Santa Clara, CA, USA). The injections were performed on a Zorbax XDB-Phenyl column (250 × 4.6 mm i.d., 5 μm; Agilent, Santa-Clara, CA, USA) at 1 mL/min, with H<sub>2</sub>O (A) and MeCN (B) both containing 0.1% formic acid as solvents. Once a good separation was achieved, the optimized conditions were geometrically transferred to the semi-preparative scale by using the same stationary phase (see Table S3, for each chromatographic condition). The semi-preparative injections were performed on a Shimadzu system equipped with an LC-20 A module pumps, an SPD-20 A UV/VIS, a 7725I Rheodyne® valve, and an FRC-40 fraction collector (Shimadzu, Kyoto, Japan). The injections were performed on an Eclipse XDB-Phenyl column (250 × 9.4 mm i.d., 5 μm; Agilent technologies, Santa Clara, CA, USA) at 4 mL/min, with H<sub>2</sub>O (A) and MeCN (B) both containing 0.1% formic acid as solvents. The UV detection was set at 320 nm. The mixtures were injected on the semi-preparative HPLC column using a dry load (Queiroz et al., 2019). Fractions were collected, analyzed by UHPLC-PDA-ELSD-MS and combined according to their composition, affording compounds **24** (0.1 mg, 1% yield, *t<sub>R</sub>* = 30 min), **25** (2.2 mg, 14% yield, *t<sub>R</sub>* = 32.5 min), **31** (0.4 mg, 3% yield, *t<sub>R</sub>* = 28.5 min), **32** (3.5 mg, 24% yield, *t<sub>R</sub>* = 33 min), **38** (0.3 mg, 2% yield, *t<sub>R</sub>* = 32 min), **39** (3.5 mg, 21% yield, *t<sub>R</sub>* = 39.5 min), **43** (1.5 mg, 15% yield, *t<sub>R</sub>* = 23 min), and **44** (1.1 mg, 11% yield, *t<sub>R</sub>* = 26 min).

## Supplementary Figures and Tables

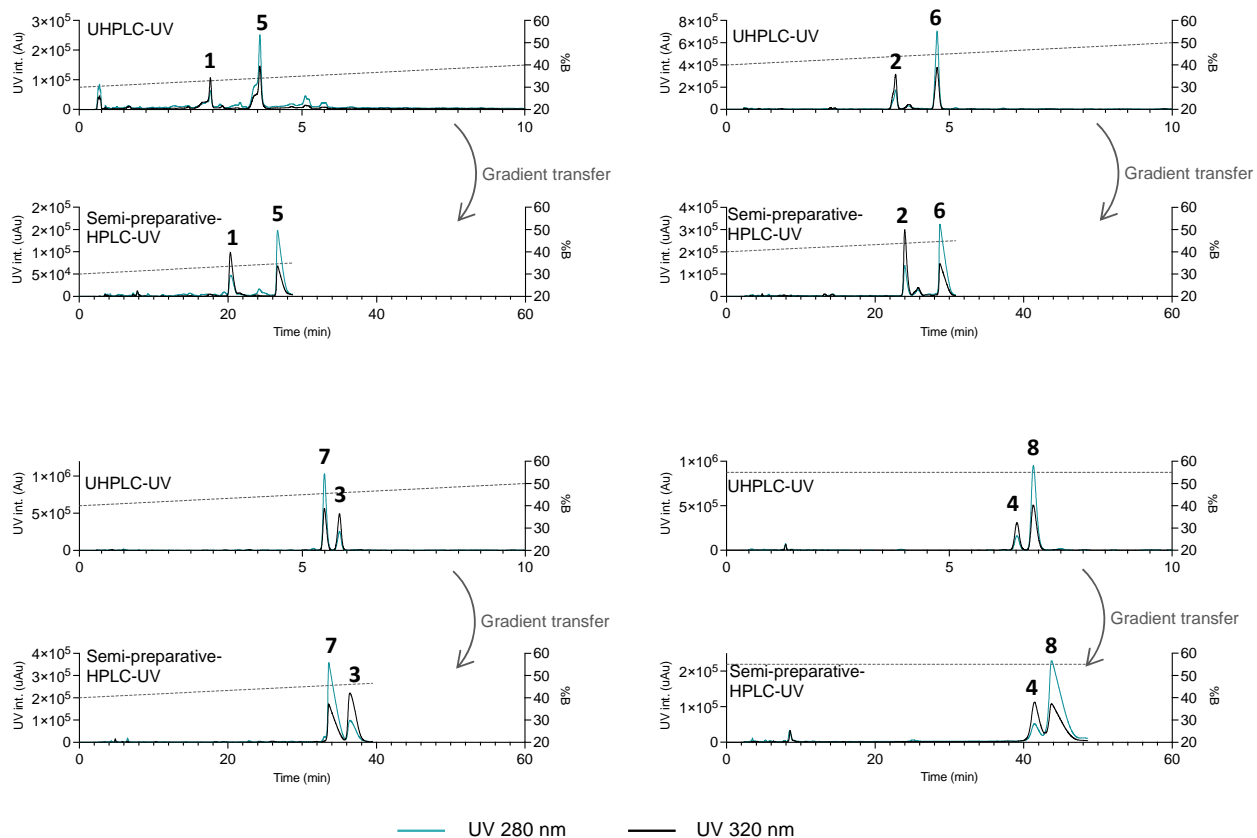

**Figure S1. Isolation of *cis* isomers of *trans*- $\delta$ -viniferin derivatives.** UHPLC-UV optimization ( $C_{18}$  100 x 2.1 mm i.d., 1.7  $\mu$ m) and transfer to semi-preparative HPLC-UV ( $C_{18}$  250 x 19 mm i.d., 5  $\mu$ m) for mixtures of compounds **1** and **5**; **2** and **6**; **3** and **7**; **4** and **8**. Differences in absorption between 280 and 320 nm allow the identification of *cis* and *trans* isomers.

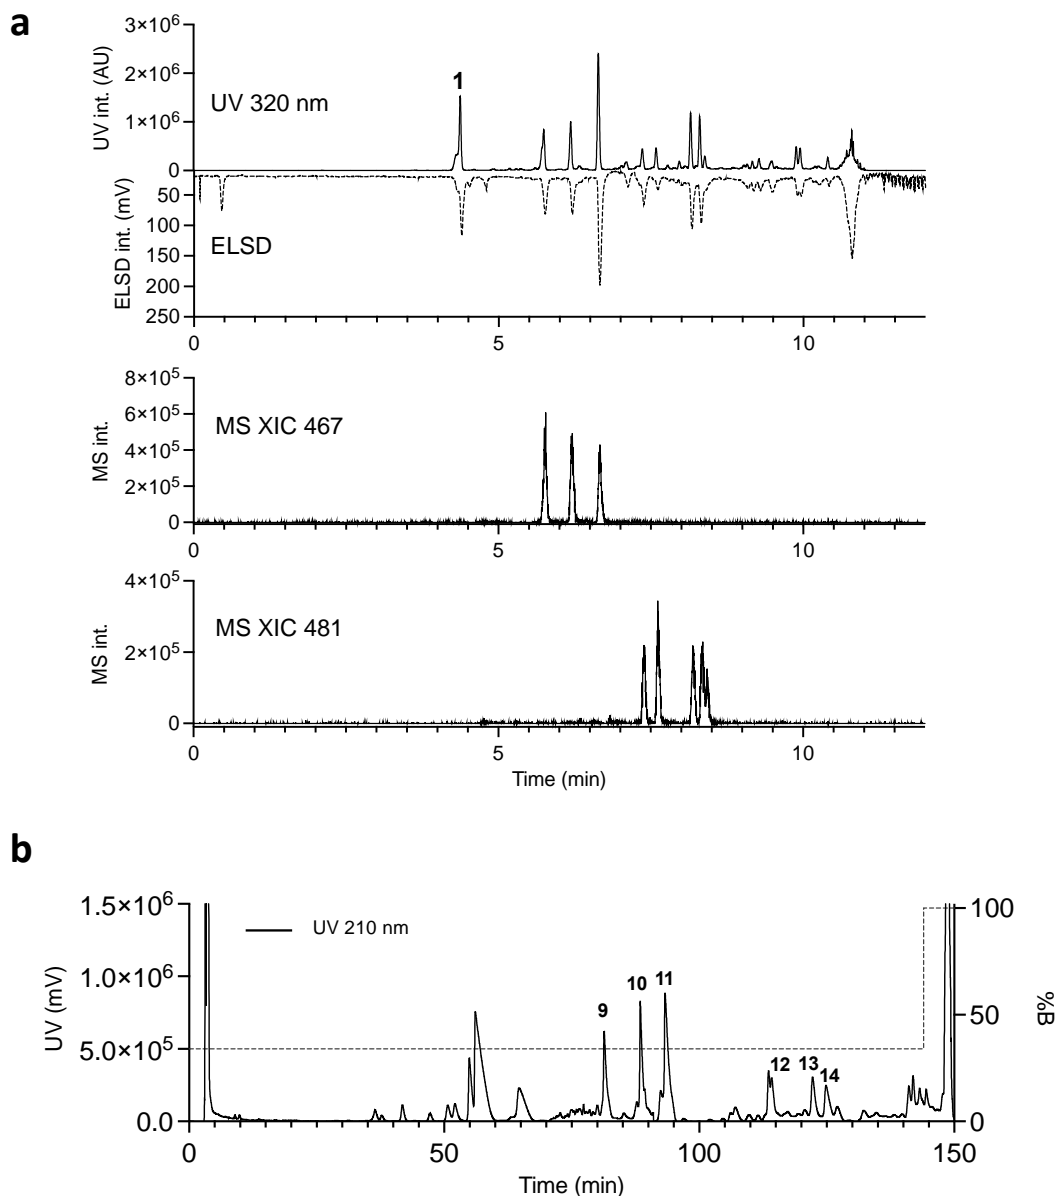

**Figure S2. Synthesis and isolation of *O*-methylated derivatives of *trans*- $\delta$ -viniferin.** (a) Reaction monitoring on UHPLC-PDA-ELSD-MS ( $C_{18}$  100 x 2.1 mm i.d., 1.7  $\mu$ m, gradient from 20 to 100% MeCN in 10 min). Extracted ion chromatograms (XIC) allow easy localisation of mono- ( $m/z$  467) and di- ( $m/z$  481) *O*-methylated derivatives. (b) Semi-preparative HPLC-UV separation ( $C_{18}$  250 x 19 mm i.d., 5  $\mu$ m) using isocratic conditions (34% MeCN).

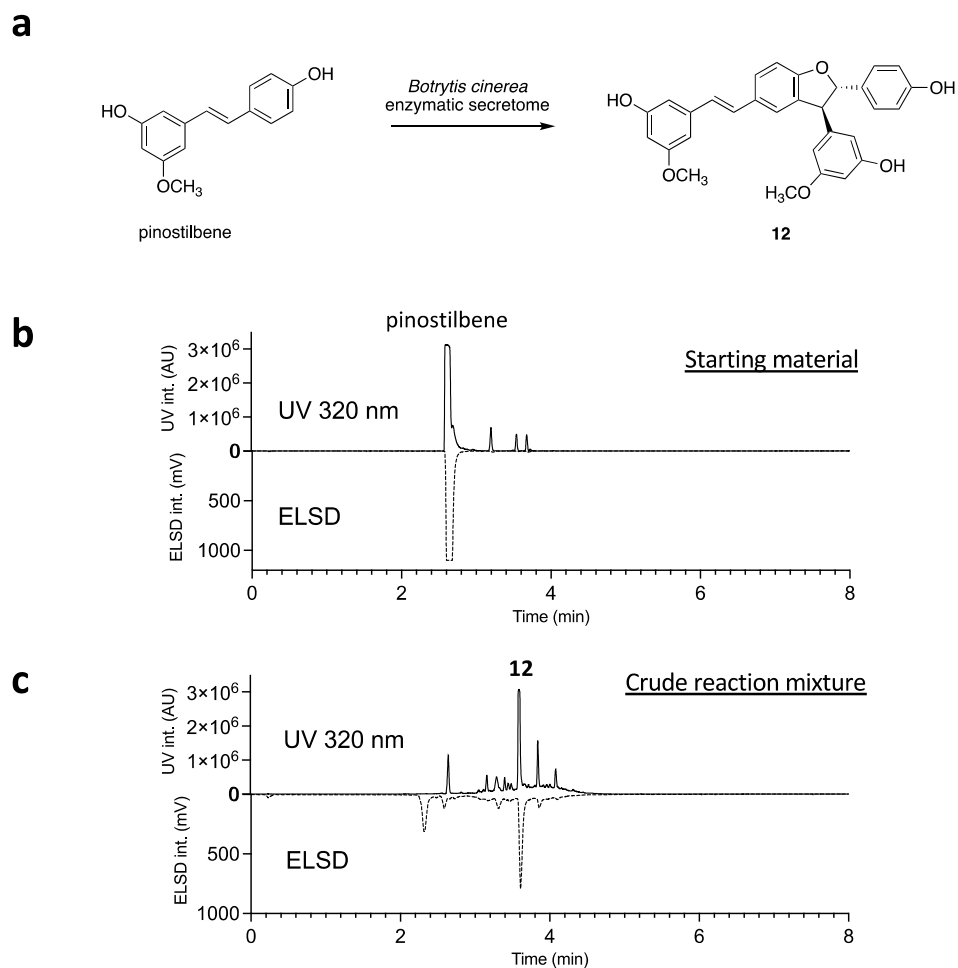

**Figure S3. Synthesis of compound 12 using a chemoenzymatic approach. (a)** Reaction scheme. **(b)** UHPLC-PDA-ELSD (C<sub>18</sub> 50 x 2.1 mm i.d., 1.7 μm) analysis of the starting material pinostilbene. **(c)** Analysis of the crude reaction mixture using the same instrument. Compound **12** is the main product, as shown by the ELSD analysis.

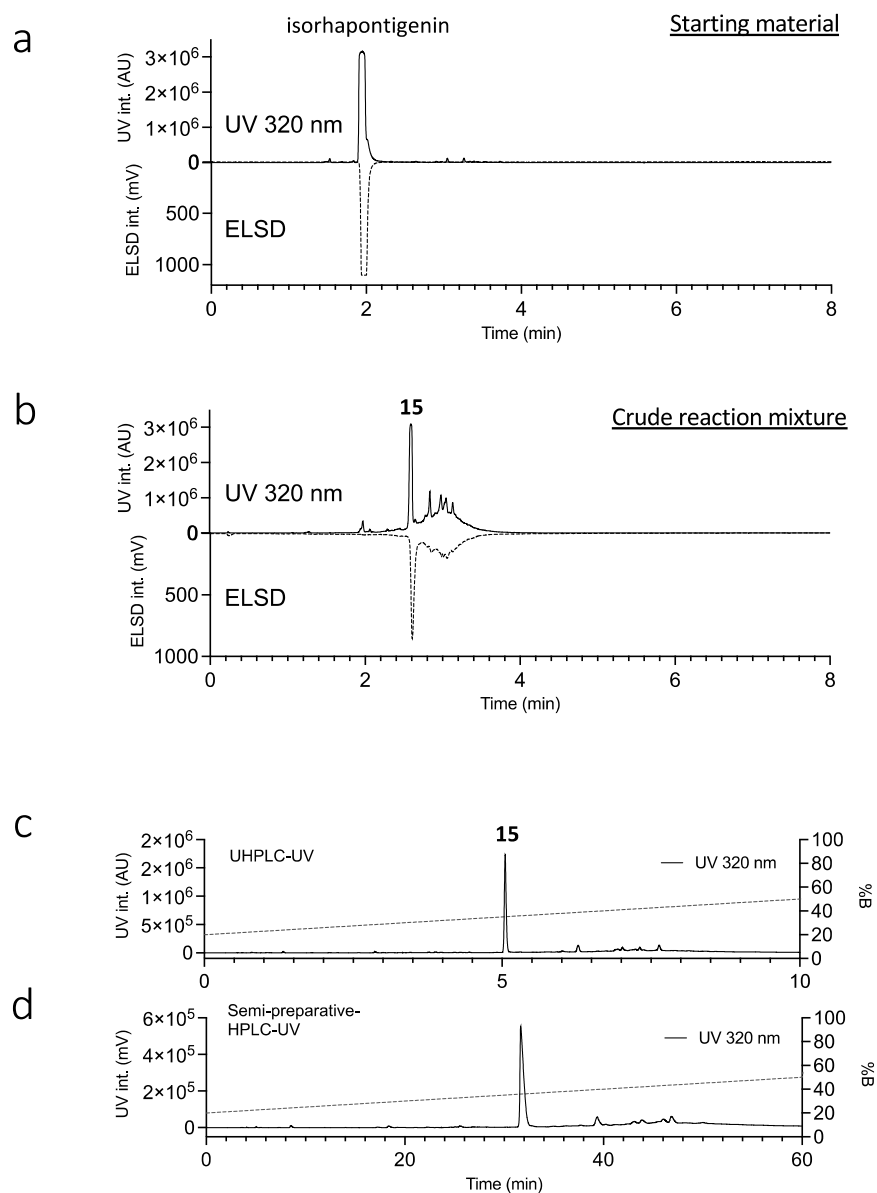

**Figure S4. Synthesis of compound 15 by a chemoenzymatic approach.** (a) UHPLC-PDA-ELSD ( $C_{18}$  50 x 2.1 mm i.d., 1.7  $\mu$ m) analysis of the starting material isorhapontigenin. (b) Analysis of the crude reaction mixture using the same instrument. Compound **15** is the main product, as shown by the ELSD analysis. (c) UHPLC-UV optimization ( $C_{18}$  100 x 2.1 mm i.d., 1.7  $\mu$ m) and (d) Semi-preparative HPLC-UV run ( $C_{18}$  250 x 19 mm i.d., 5  $\mu$ m).



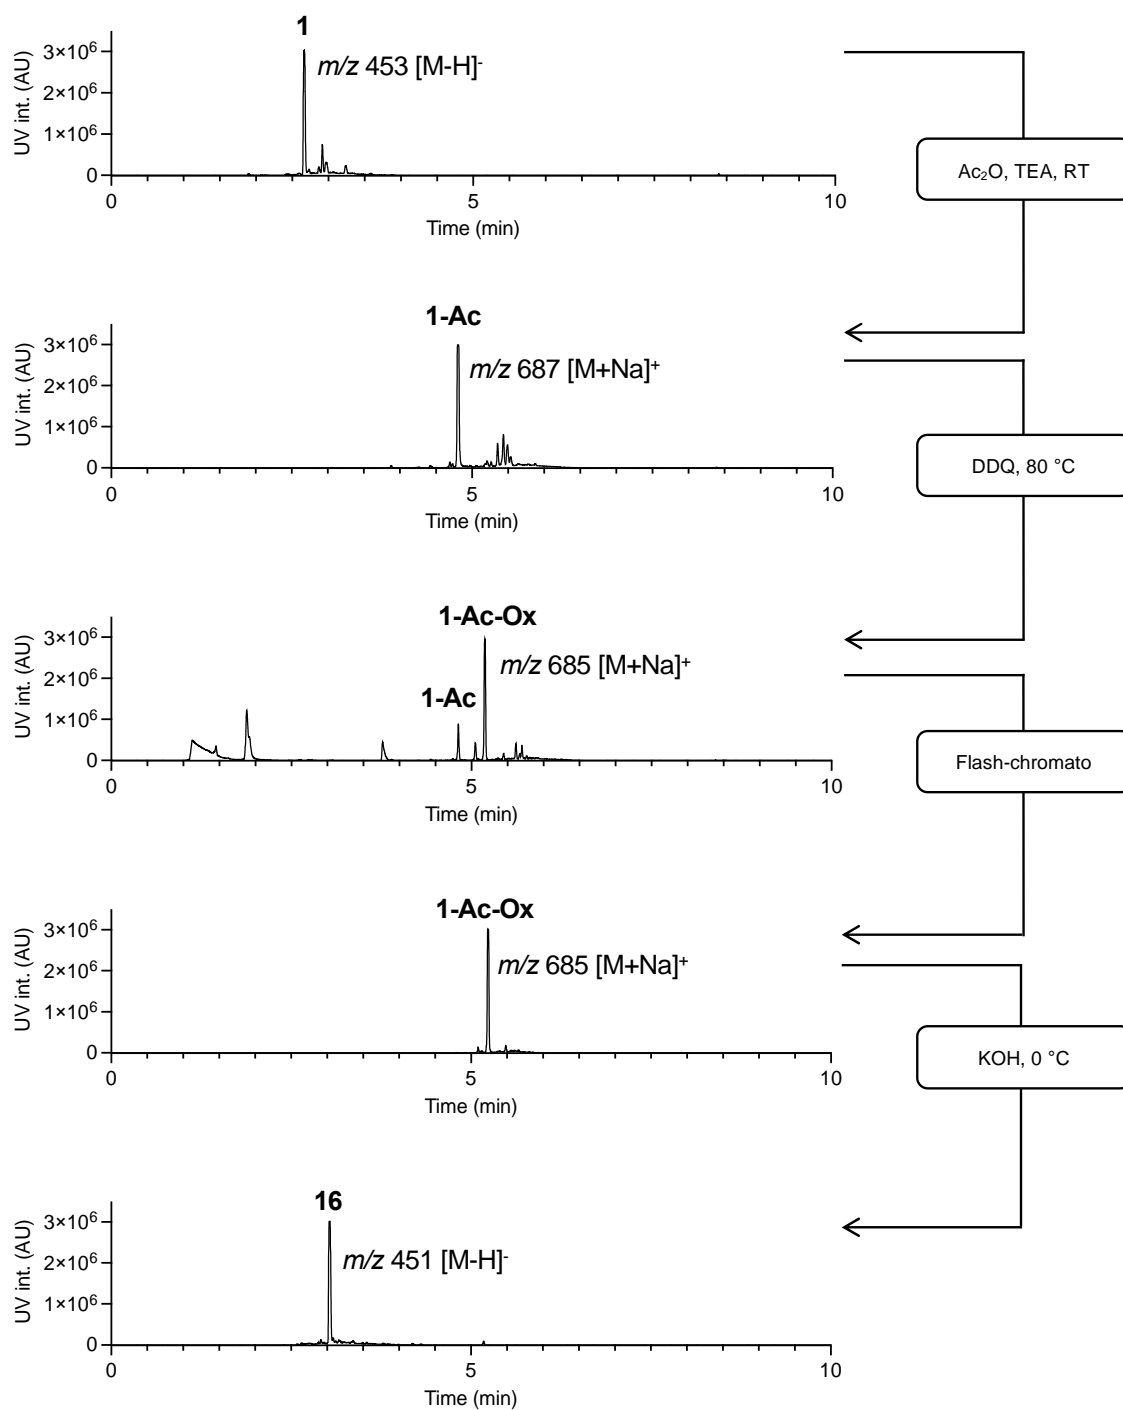

**Figure S5.** UHPLC (C<sub>18</sub> 50 x 2.1 mm i.d., 1.7 μm) monitoring of the different steps in the synthesis of compound **16**. Detailed reaction conditions are given in the material and methods section.

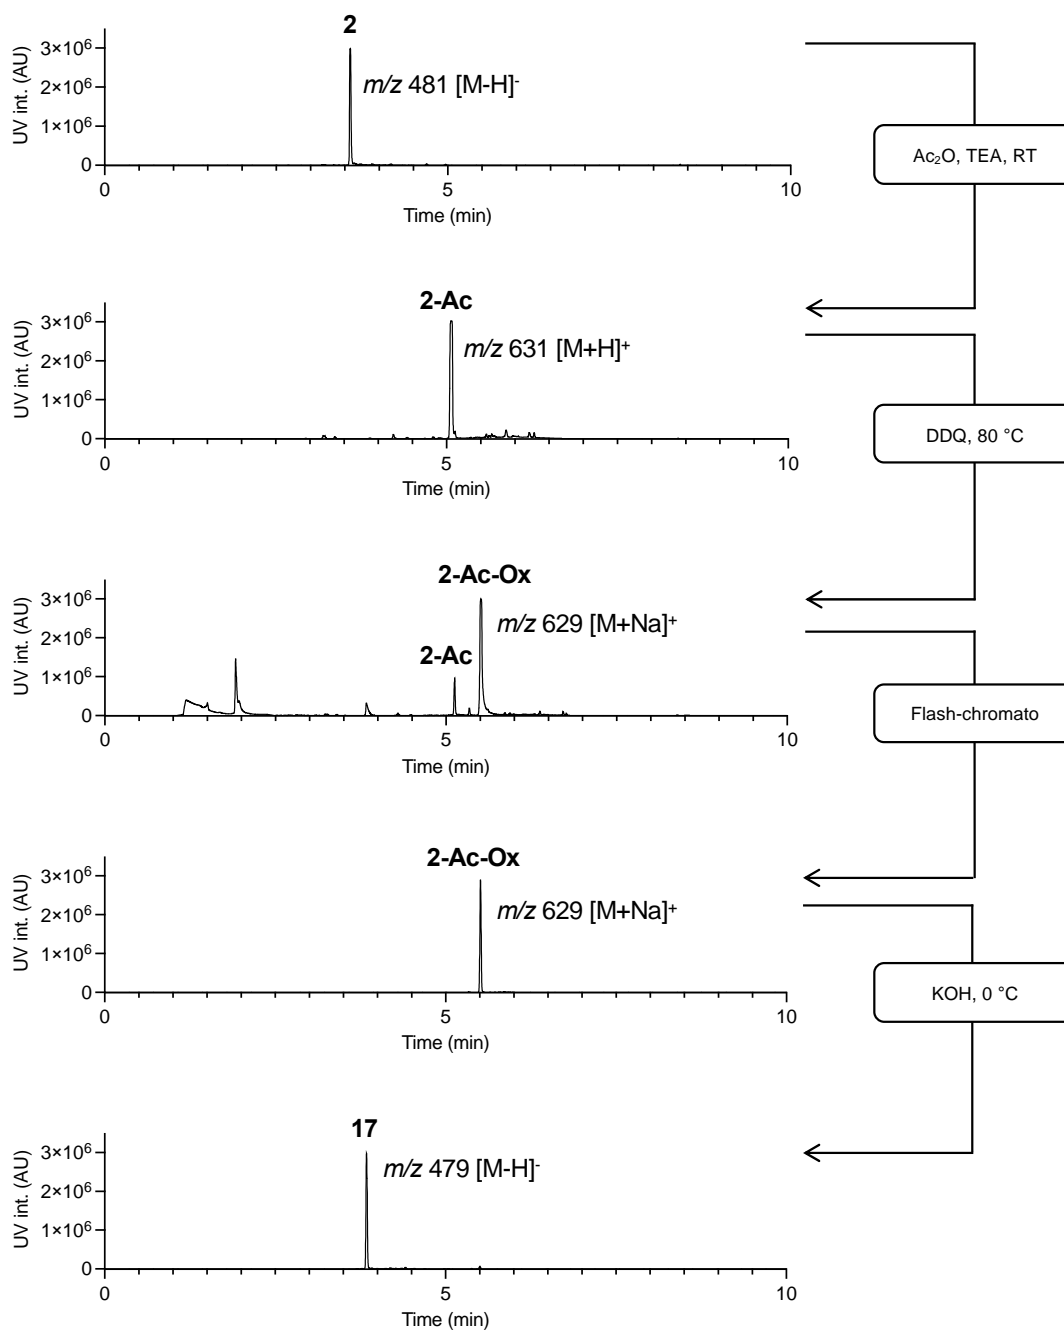

**Figure S6.** UHPLC (C<sub>18</sub> 50 x 2.1 mm i.d., 1.7 μm) monitoring of the different steps in the synthesis of compound **17**. Detailed reaction conditions are given in the material and methods section.

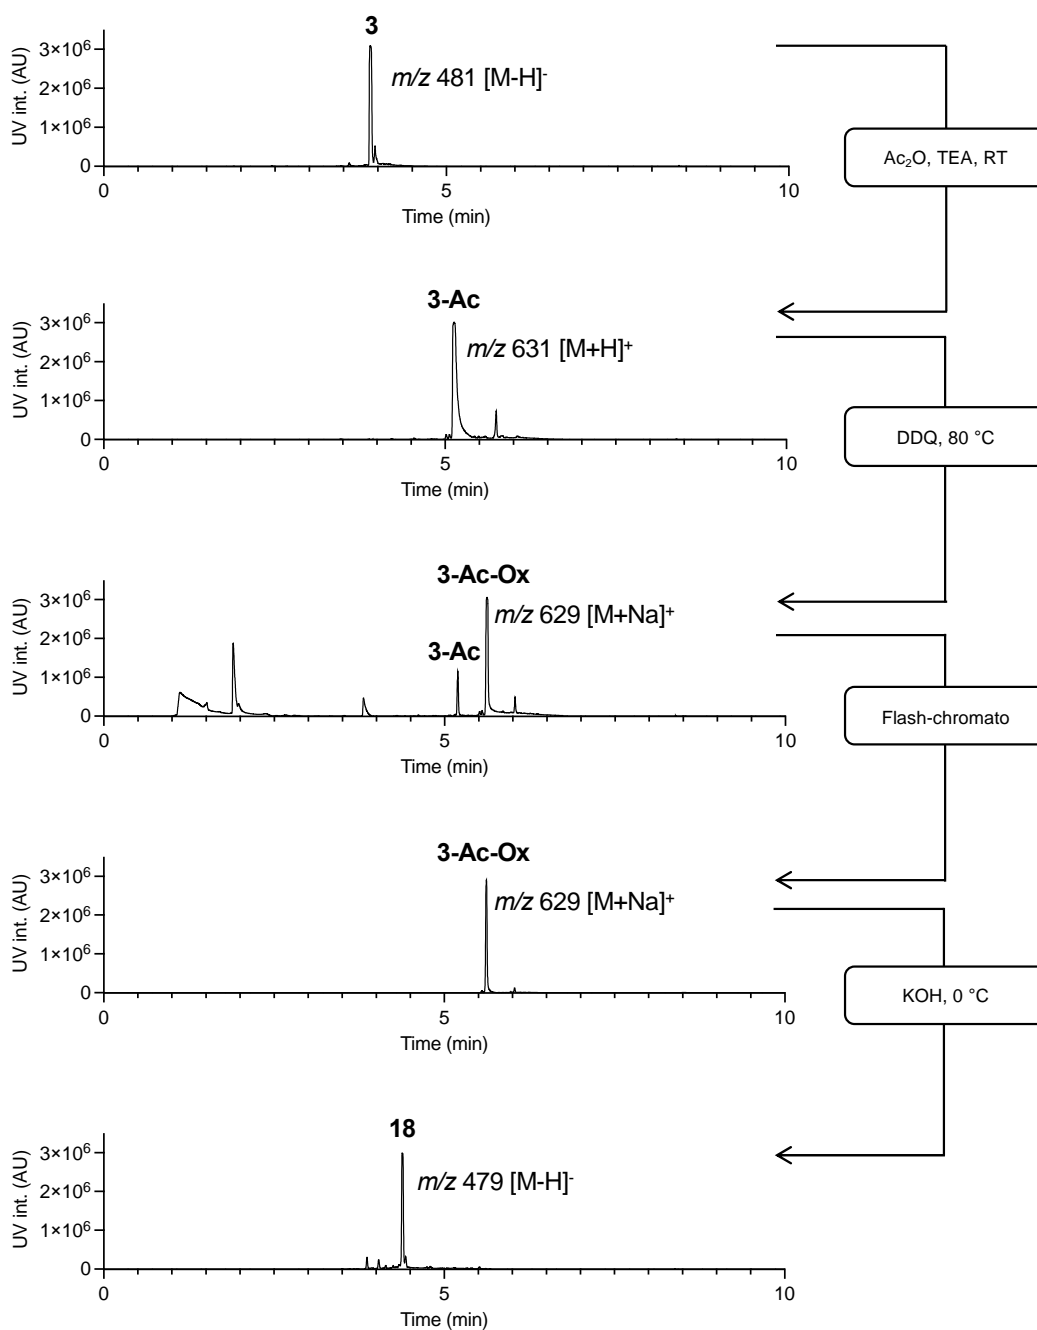

**Figure S7.** UHPLC (C<sub>18</sub> 50 x 2.1 mm i.d., 1.7 μm) monitoring of the different steps in the synthesis of compound **18**. Detailed reaction conditions are given in the material and methods section.

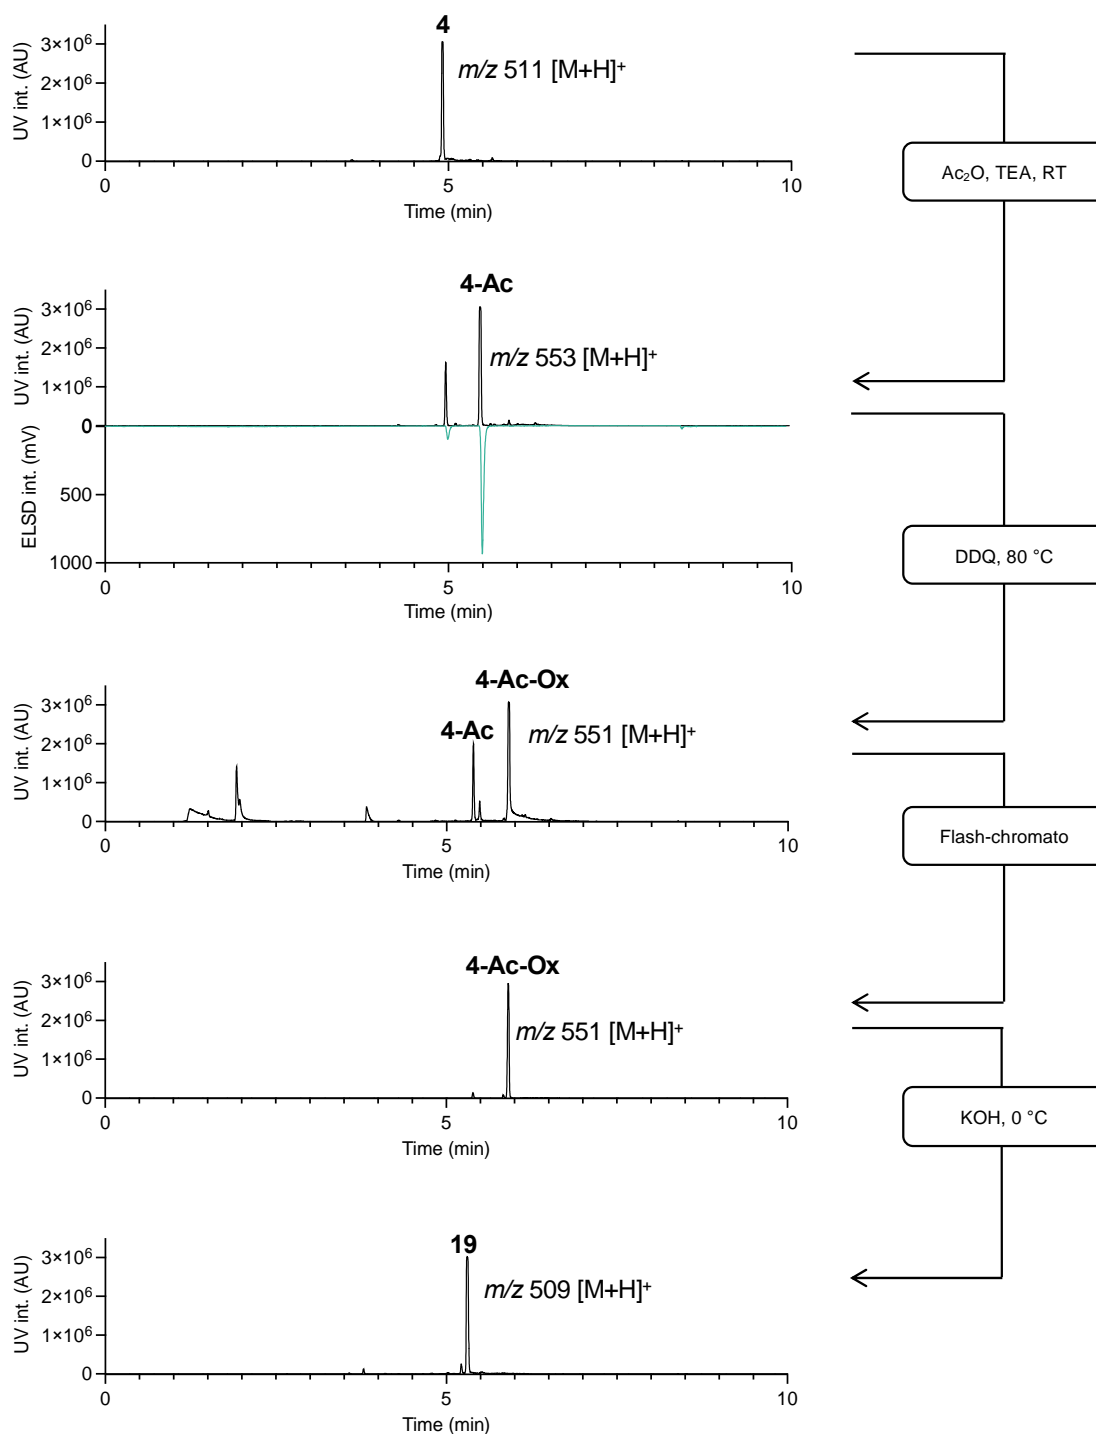

**Figure S8.** UHPLC (C<sub>18</sub> 50 x 2.1 mm i.d., 1.7 μm) monitoring of the different steps in the synthesis of compound **19**. Detailed reaction conditions are given in the material and methods section. ELSD detection is shown for the acetylated compound **4-Ac** to highlight that it is the main product, as the UV absorption at 320 nm appears to show an almost 2:3 ratio with the starting compound **4**.

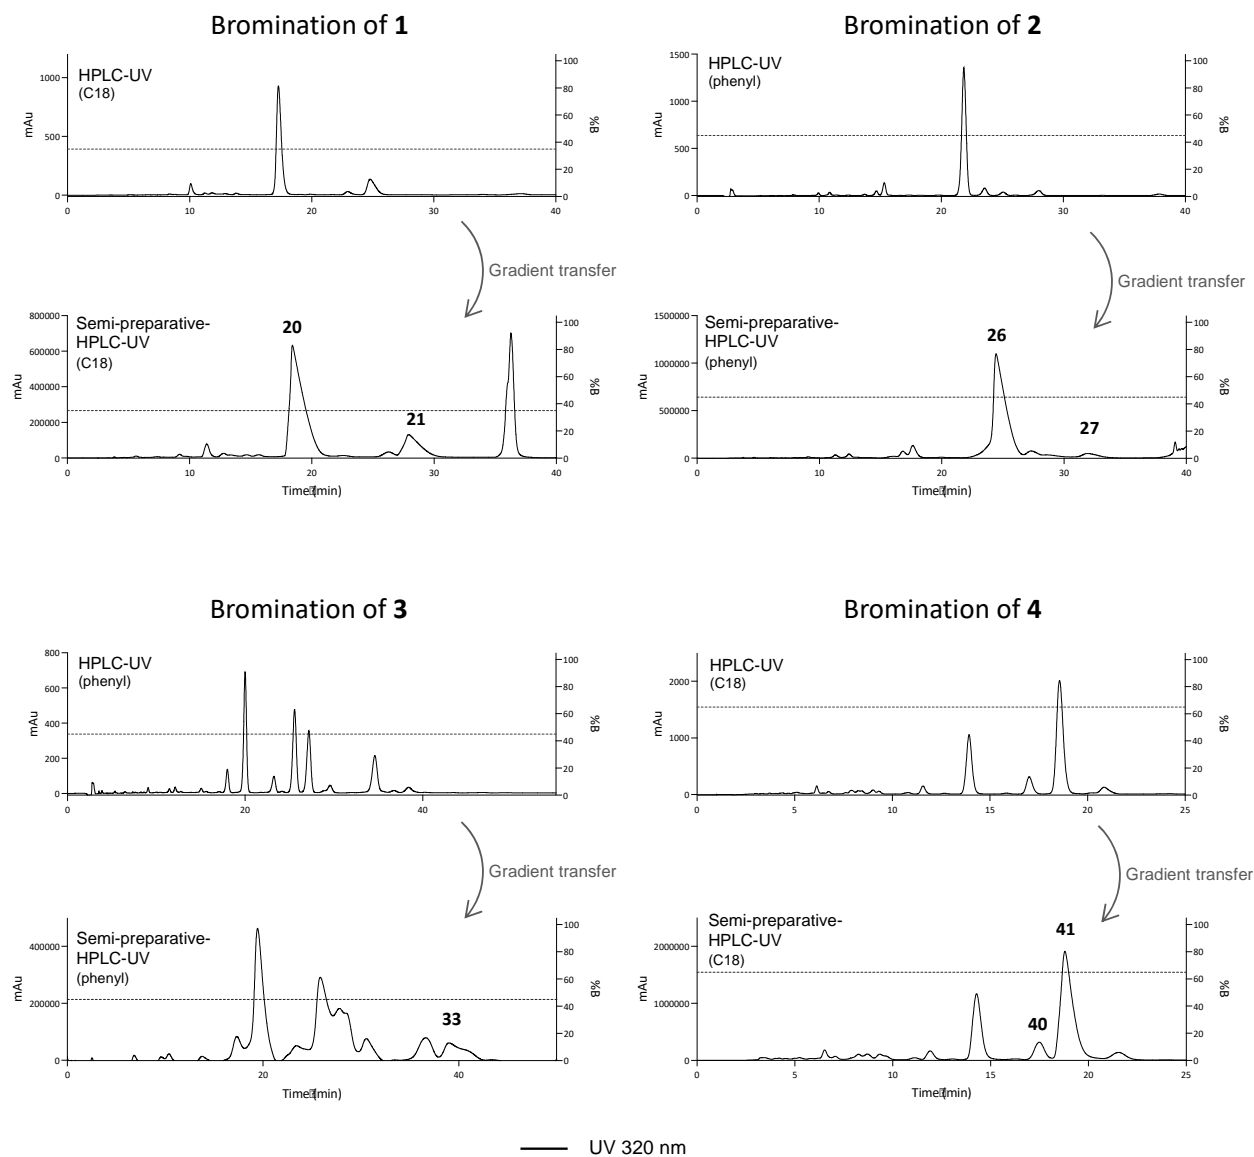

**Figure S9. Isolation of brominated derivatives of *trans*- $\delta$ -viniferin derivatives 1-4.** For each starting compound, the top chromatogram corresponds to HPLC-UV optimization (C<sub>18</sub> or phenyl, 250 x 4.6 mm i.d., 5  $\mu$ m) and the bottom chromatogram is the transfer to semi-preparative HPLC-UV (C<sub>18</sub> or phenyl, ~250 x 10 mm i.d., 5  $\mu$ m).

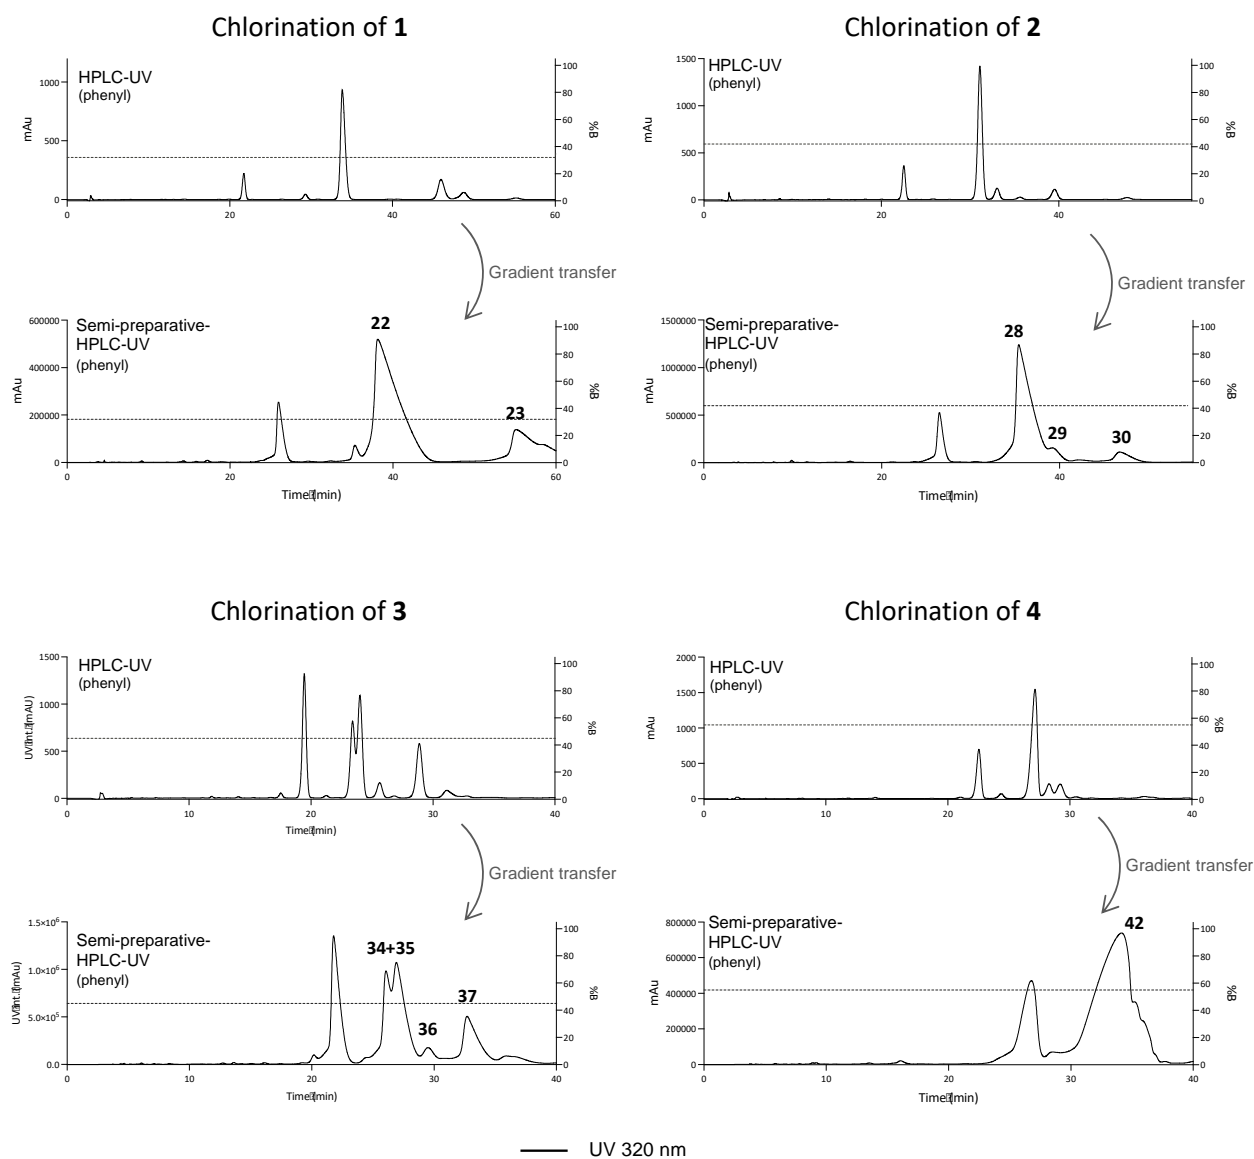

**Figure S10. Isolation of chlorinated derivatives of *trans*- $\delta$ -viniferin derivatives 1-4.** For each starting compound, the top chromatogram corresponds to HPLC-UV optimization (Phenyl 250 x 4.6 mm i.d., 5 μm) and the bottom chromatogram is the transfer to semi-preparative HPLC-UV (Phenyl, 250 x 9.4 mm i.d., 5 μm). Separation of compounds **34** and **35** is shown in Figure 6.

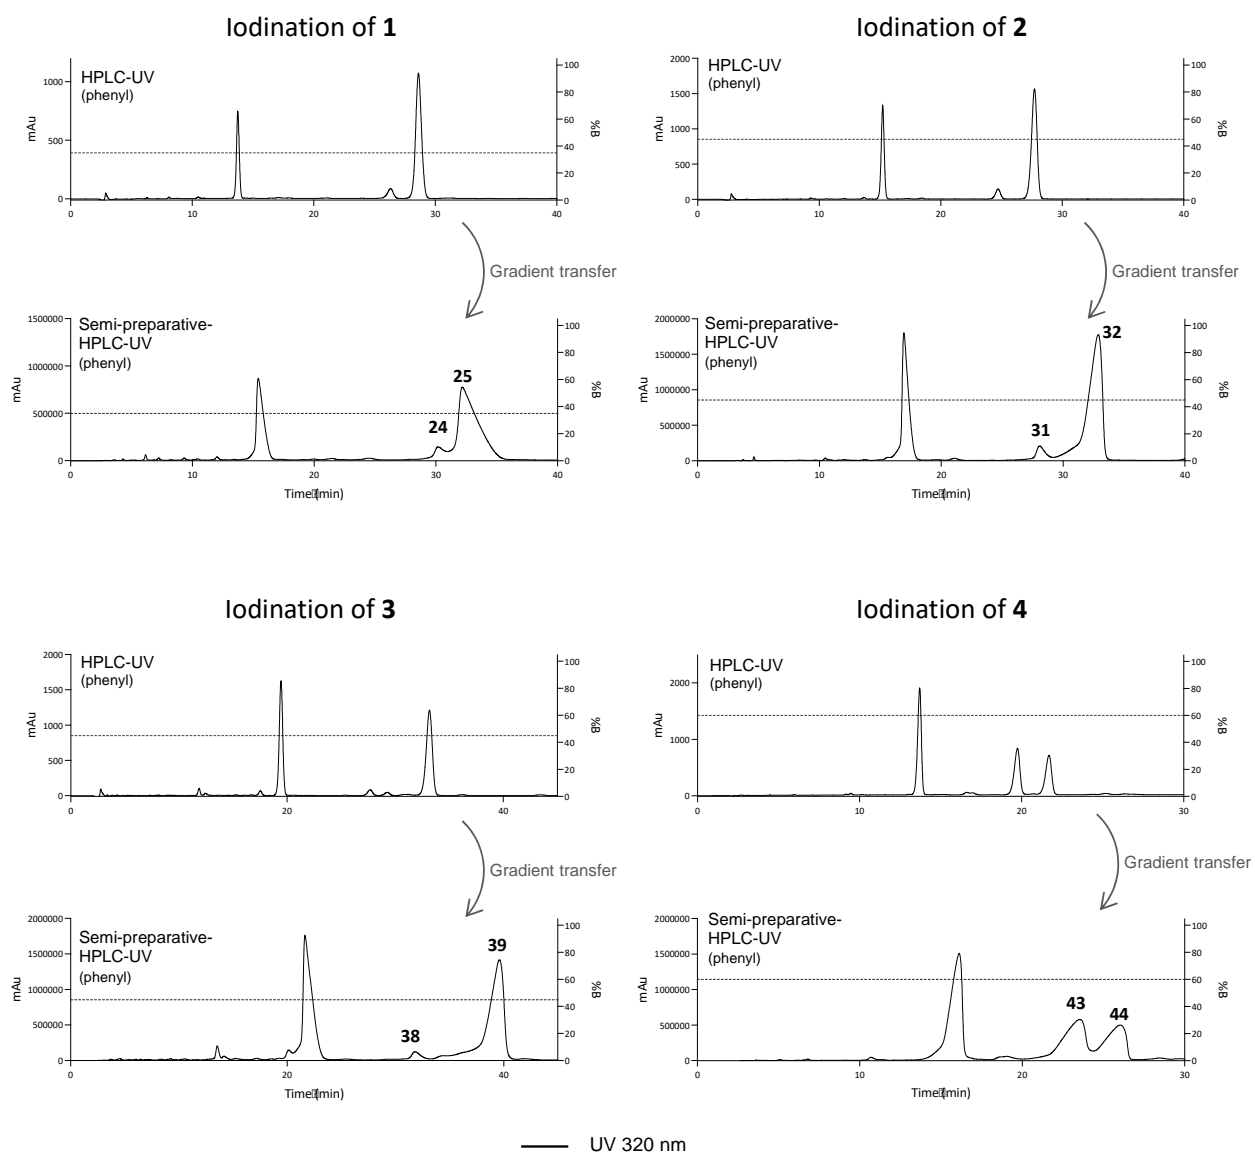

**Figure S11. Isolation of iodinated derivatives of *trans*- $\delta$ -viniferin derivatives 1-4.** For each starting compound, the top chromatogram corresponds to HPLC-UV optimization (Phenyl 250 x 4.6 mm i.d., 5  $\mu$ m) and the bottom chromatogram is the transfer to semi-preparative HPLC-UV (Phenyl, 250 x 9.4 mm i.d., 5  $\mu$ m).

**Table S1.** Details of the linear model.

| Variable                                                                 | Estimated coefficient | Standard error | p-value  | Significance |
|--------------------------------------------------------------------------|-----------------------|----------------|----------|--------------|
| Intercept                                                                | 2.29                  | 0.10           | < 2e-16  | ***          |
| A OCH <sub>3</sub> /CH <sub>3</sub>                                      | -1.13                 | 0.22           | 3.66E-06 | ***          |
| R <sub>6,7</sub> OCH <sub>3</sub>                                        | 1.53                  | 0.35           | 6.96E-05 | ***          |
| A Cl/Cl                                                                  | 0.49                  | 0.35           | 0.174844 |              |
| A H/Br                                                                   | 0.69                  | 0.19           | 0.000688 | ***          |
| A H/I                                                                    | 0.42                  | 0.22           | 0.060158 | .            |
| R <sub>10</sub> Cl                                                       | 0.83                  | 0.35           | 0.022283 | *            |
| A OCH <sub>3</sub> /CH <sub>3</sub> :C OCH <sub>3</sub> /CH <sub>3</sub> | 2.73                  | 0.25           | 4.29E-15 | ***          |
| C OCH <sub>3</sub> /CH <sub>3</sub> :R <sub>10</sub> I                   | 0.56                  | 0.26           | 0.038294 | *            |
| A OCH <sub>3</sub> /CH <sub>3</sub> :R <sub>9</sub> Br                   | 2.31                  | 0.44           | 2.47E-06 | ***          |
| A OCH <sub>3</sub> /CH <sub>3</sub> :R <sub>9</sub> Cl                   | -0.86                 | 0.34           | 0.015543 | *            |
| A H/Cl:R <sub>9</sub> Cl                                                 | 0.79                  | 0.29           | 0.007996 | **           |

The symbols \*\*\*, \*\*, \* and · correspond to p-values in the following intervals [0, 0.1%), [0.1%, 1%), [1%, 5%) and [5%, 10%), respectively

**Table S2.** Chromatographic conditions for the separation of the mixtures of *trans/cis* isomers of *trans*- $\delta$ -viniferin derivatives.

| Mixture               | UHPLC (100 x 2.1 mm i.d., 1.7 $\mu$ m) |    |     |            | Semi-preparative HPLC (250 x 19 mm i.d., 5 $\mu$ m) |    |     |            |
|-----------------------|----------------------------------------|----|-----|------------|-----------------------------------------------------|----|-----|------------|
|                       | Flow-rate (mL/min)                     | %A | %B  | Time (min) | Flow-rate (mL/min)                                  | %A | %B  | Time (min) |
| 1 + 5                 | 0.5                                    | 70 | 30  | 0          | 17                                                  | 70 | 30  | 0          |
|                       |                                        | 60 | 40  | 10         |                                                     | 60 | 40  | 60         |
|                       |                                        | 0  | 100 | 10.2       |                                                     | 0  | 100 | 61         |
|                       |                                        | 0  | 100 | 11.7       |                                                     | 0  | 100 | 70         |
| 2 + 6<br>and<br>3 + 7 | 0.5                                    | 60 | 40  | 0          | 17                                                  | 60 | 40  | 0          |
|                       |                                        | 50 | 50  | 10         |                                                     | 50 | 50  | 60         |
|                       |                                        | 0  | 100 | 10.2       |                                                     | 0  | 100 | 61         |
|                       |                                        | 0  | 100 | 11.7       |                                                     | 0  | 100 | 70         |
| 4 + 8                 | 0.5                                    | 45 | 55  | 0.0        | 17                                                  | 45 | 55  | 0          |
|                       |                                        | 45 | 55  | 10.0       |                                                     | 45 | 55  | 60         |
|                       |                                        | 0  | 100 | 10.2       |                                                     | 0  | 100 | 61         |
|                       |                                        | 0  | 100 | 11.7       |                                                     | 0  | 100 | 70         |



**Table S3.** Chromatographic conditions (stationary phase, percentage of MeCN) for each separation of halogenation reactions.

| Starting material /<br>halogenation reaction | Br                             | Cl                   | I                    |
|----------------------------------------------|--------------------------------|----------------------|----------------------|
| <b>1</b>                                     | C <sub>18</sub> , ISO 35% MeCN | Phenyl, ISO 32% MeCN | Phenyl, ISO 35% MeCN |
| <b>2</b>                                     | Phenyl, ISO 45% MeCN           | Phenyl, ISO 42% MeCN | Phenyl, ISO 45% MeCN |
| <b>3</b>                                     | Phenyl, ISO 45% MeCN           | Phenyl, ISO 45% MeCN | Phenyl, ISO 45% MeCN |
| <b>4</b>                                     | C <sub>18</sub> , ISO 65% MeCN | Phenyl, ISO 55% MeCN | Phenyl, ISO 60% MeCN |

**Table S4.** Complete table with every compound generated and associated data (name, SMILE, molecular weight, MIC).

| Number | Name                                                   | SMILES                                                                                                     | MW (g/mol) | Type                   | MIC <i>S. aureus</i> NEWMAN (MSSA) (μM) |
|--------|--------------------------------------------------------|------------------------------------------------------------------------------------------------------------|------------|------------------------|-----------------------------------------|
| 1      | trans-δ-viniferin                                      | <chem>OC1=CC=C([C@H](O2)[C@H](C3=CC(O)=CC(O)=C3)C4=C2C=CC(/C=C/C5=CC(O)=CC(O)=C5)=C4)C=C1</chem>           | 454        | Viniferin              | 16-32                                   |
| 2      | 11',13'-di-O-methyl-trans-δ-viniferin                  | <chem>OC1=CC=C([C@H](O2)[C@H](C3=CC(OC)=CC(OC)=C3)C4=C2C=CC(/C=C/C5=CC(O)=CC(O)=C5)=C4)C=C1</chem>         | 482        | Viniferin              | 4                                       |
| 3      | 11,13-di-O-methyl-trans-δ-viniferin                    | <chem>OC(C=C1)=CC=C1[C@@H](O2)[C@@H](C3=CC(O)=CC(O)=C3)C4=C2C=CC(/C=C/C5=CC(OC)=CC(OC)=C5)=C4</chem>       | 482        | Viniferin              | 4                                       |
| 4      | 11,11',13,13'-tetra-O-methyl-trans-δ-viniferin         | <chem>OC(C=C1)=CC=C1[C@@H](O2)[C@@H](C3=CC(OC)=CC(OC)=C3)C4=C2C=CC(/C=C/C5=CC(OC)=CC(OC)=C5)=C4</chem>     | 510        | Viniferin              | >64                                     |
| 5      | cis-δ-viniferin                                        | <chem>OC(C=C1)=CC=C1[C@@H](O2)[C@@H](C3=CC(O)=CC(O)=C3)C4=C2C=CC(/C=C/C5=CC(O)=CC(O)=C5)=C4</chem>         | 454        | cis form               | 32-64                                   |
| 6      | 11',13'-di-O-methyl-cis-δ-viniferin                    | <chem>OC(C=C1)=CC=C1[C@@H](O2)[C@@H](C3=CC(OC)=CC(OC)=C3)C4=C2C=CC(/C=C/C5=CC(O)=CC(O)=C5)=C4</chem>       | 482        | cis form               | 8-16                                    |
| 7      | 11,13-di-O-methyl-cis-δ-viniferin                      | <chem>OC(C=C1)=CC=C1[C@@H](O2)[C@@H](C3=CC(O)=CC(O)=C3)C4=C2C=CC(/C=C/C5=CC(OC)=CC(OC)=C5)=C4</chem>       | 482        | cis form               | 8-16                                    |
| 8      | 11,11',13,13'-tetra-O-methyl-cis-δ-viniferin           | <chem>OC(C=C1)=CC=C1[C@@H](O2)[C@@H](C3=CC(OC)=CC(OC)=C3)C4=C2C=CC(/C=C/C5=CC(OC)=CC(OC)=C5)=C4</chem>     | 510        | cis form               | >64                                     |
| 9      | 11'-O-methyl-trans-δ-viniferin                         | <chem>OC(C=C1)=CC=C1[C@@H](O2)[C@@H](C3=CC(O)=CC(OC)=C3)C4=C2C=CC(/C=C/C5=CC(O)=CC(O)=C5)=C4</chem>        | 468        | O-methyl derivative    | 8-16                                    |
| 10     | 11-O-methyl-trans-δ-viniferin                          | <chem>OC(C=C1)=CC=C1[C@@H](O2)[C@@H](C3=CC(O)=CC(O)=C3)C4=C2C=CC(/C=C/C5=CC(O)=CC(OC)=C5)=C4</chem>        | 468        | O-methyl derivative    | 8-16                                    |
| 11     | 4'-O-methyl-trans-δ-viniferin                          | <chem>OC1=CC([C@H]([C@@H](C2=CC=C(OC)C=C2)O3)C4=C3C=CC(/C=C/C5=CC(O)=CC(O)=C5)=C4)=CC(O)=C1</chem>         | 468        | O-methyl derivative    | 8                                       |
| 12     | 11,11'-di-O-methyl-trans-δ-viniferin                   | <chem>OC(C=C1)=CC=C1[C@@H](O2)[C@@H](C3=CC(O)=CC(OC)=C3)C4=C2C=CC(/C=C/C5=CC(OC)=CC(O)=C5)=C4</chem>       | 482        | O-methyl derivative    | 8                                       |
| 13     | 4',11'-di-O-methyl-trans-δ-viniferin                   | <chem>OC1=CC(OC)=CC([C@H]([C@@H](C2=CC=C(OC)C=C2)O3)C4=C3C=CC(/C=C/C5=CC(O)=CC(O)=C5)=C4)=C1</chem>        | 482        | O-methyl derivative    | 8                                       |
| 14     | 4',11-di-O-methyl-trans-δ-viniferin                    | <chem>OC1=CC([C@H]([C@@H](C2=CC=C(OC)C=C2)O3)C4=C3C=CC(/C=C/C5=CC(OC)=CC(O)=C5)=C4)=CC(O)=C1</chem>        | 482        | O-methyl derivative    | 8                                       |
| 15     | 5,5'-dimethoxy-trans-δ-viniferin                       | <chem>OC(C=C1)=C(OC)C=C1[C@@H](O2)[C@@H](C3=CC(O)=CC(O)=C3)C4=C2C(OC)=CC(/C=C/C5=CC(O)=CC(O)=C5)=C4</chem> | 514        | Other dimer            | 32-64                                   |
| 16     | dehydro-trans-δ-viniferin                              | <chem>OC1=CC=C(C(O2)=C(C3=CC(O)=CC(O)=C3)C4=C2C=CC(/C=C/C5=CC(O)=CC(O)=C5)=C4)C=C1</chem>                  | 452        | Benzofuran derivative  | 8                                       |
| 17     | 11',13'-di-O-methyl-dehydro-trans-δ-viniferin          | <chem>OC1=CC=C(C(O2)=C(C3=CC(OC)=CC(OC)=C3)C4=C2C=CC(/C=C/C5=CC(O)=CC(O)=C5)=C4)C=C1</chem>                | 480        | Benzofuran derivative  | 4-8                                     |
| 18     | 11,13-di-O-methyl-dehydro-trans-δ-viniferin            | <chem>OC1=CC=C(C(O2)=C(C3=CC(O)=CC(O)=C3)C4=C2C=CC(/C=C/C5=CC(OC)=CC(OC)=C5)=C4)C=C1</chem>                | 480        | Benzofuran derivative  | 8                                       |
| 19     | 11,11',13,13'-tetra-O-methyl-dehydro-trans-δ-viniferin | <chem>OC1=CC=C(C(O2)=C(C3=CC(OC)=CC(OC)=C3)C4=C2C=CC(/C=C/C5=CC(OC)=CC(OC)=C5)=C4)C=C1</chem>              | 508        | Benzofuran derivative  | >64                                     |
| 20     | 14-bromo-trans-δ-viniferin                             | <chem>OC1=CC=C([C@H](O2)[C@H](C3=CC(O)=CC(O)=C3)C4=C2C=CC(/C=C/C5=C(Br)C(O)=CC(O)=C5)=C4)C=C1</chem>       | 533        | Halogenated derivative | 16-32                                   |

|    |                                                                   |                                                                                                 |     |                        |       |
|----|-------------------------------------------------------------------|-------------------------------------------------------------------------------------------------|-----|------------------------|-------|
| 21 | 14,14'-dibromo-trans- $\delta$ -viniferin                         | OC1=CC=C([C@H](O2)[C@H](C3=C(Br)C(O)=CC(O)=C3)C4=C2C=CC(/C=C/C5=C(Br)C(O)=CC(O)=C5)=C4)C=C1     | 612 | Halogenated derivative | 16-32 |
| 22 | 14-chloro-trans- $\delta$ -viniferin                              | OC1=CC=C([C@H](O2)[C@H](C3=CC(O)=CC(O)=C3)C4=C2C=CC(/C=C/C5=C(Cl)C(O)=CC(O)=C5)=C4)C=C1         | 488 | Halogenated derivative | 16-32 |
| 23 | 14,14'-dichloro-trans- $\delta$ -viniferin                        | OC1=CC=C([C@H](O2)[C@H](C3=C(Cl)C(O)=CC(O)=C3)C4=C2C=CC(/C=C/C5=C(Cl)C(O)=CC(O)=C5)=C4)C=C1     | 523 | Halogenated derivative | 16-32 |
| 24 | 14-iodo-trans- $\delta$ -viniferin                                | OC1=CC=C([C@H](O2)[C@H](C3=CC(O)=CC(O)=C3)C4=C2C=CC(/C=C/C5=C(I)C(O)=CC(O)=C5)=C4)C=C1          | 580 | Halogenated derivative | 16-32 |
| 25 | 12-iodo-trans- $\delta$ -viniferin                                | OC1=CC=C([C@H](O2)[C@H](C3=CC(O)=CC(O)=C3)C4=C2C=CC(/C=C/C5=CC(O)=C(I)C(O)=C5)=C4)C=C1          | 580 | Halogenated derivative | 4-8   |
| 26 | 14-bromo-11',13'-di-O-methyl-trans- $\delta$ -viniferin           | OC1=CC=C([C@H](O2)[C@H](C3=CC(OC)=CC(OC)=C3)C4=C2C=CC(/C=C/C5=C(Br)C(O)=CC(O)=C5)=C4)C=C1       | 561 | Halogenated derivative | 16-32 |
| 27 | 10,14-dibromo-11',13'-di-O-methyl-trans- $\delta$ -viniferin      | OC1=CC=C([C@H](O2)[C@H](C3=CC(OC)=CC(OC)=C3)C4=C2C=CC(/C=C/C5=C(Br)C(O)=CC(O)=C5Br)=C4)C=C1     | 640 | Halogenated derivative | NA    |
| 28 | 14-chloro-11',13'-di-O-methyl-trans- $\delta$ -viniferin          | OC1=CC=C([C@H](O2)[C@H](C3=CC(OC)=CC(OC)=C3)C4=C2C=CC(/C=C/C5=C(Cl)C(O)=CC(O)=C5)=C4)C=C1       | 516 | Halogenated derivative | 4-8   |
| 29 | 12-chloro-11',13'-di-O-methyl-trans- $\delta$ -viniferin          | OC1=CC=C([C@H](O2)[C@H](C3=CC(OC)=CC(OC)=C3)C4=C2C=CC(/C=C/C5=CC(O)=C(Cl)C(O)=C5)=C4)C=C1       | 516 | Halogenated derivative | 16-32 |
| 30 | 10,14-dichloro-11',13'-di-O-methyl-trans- $\delta$ -viniferin     | OC1=CC=C([C@H](O2)[C@H](C3=CC(OC)=CC(OC)=C3)C4=C2C=CC(/C=C/C5=C(Cl)C(O)=CC(O)=C5Cl)=C4)C=C1     | 551 | Halogenated derivative | 16    |
| 31 | 14-iodo-11',13'-di-O-methyl-trans- $\delta$ -viniferin            | OC1=CC=C([C@H](O2)[C@H](C3=CC(OC)=CC(OC)=C3)C4=C2C=CC(/C=C/C5=C(I)C(O)=CC(O)=C5)=C4)C=C1        | 608 | Halogenated derivative | 8-16  |
| 32 | 12-iodo-11',13'-di-O-methyl-trans- $\delta$ -viniferin            | OC1=CC=C([C@H](O2)[C@H](C3=CC(OC)=CC(OC)=C3)C4=C2C=CC(/C=C/C5=CC(O)=C(I)C(O)=C5)=C4)C=C1        | 608 | Halogenated derivative | 16-32 |
| 33 | 14,14'-dibromo-11,13-di-O-methyl-trans- $\delta$ -viniferin       | OC(C=C1)=CC=C1[C@@H](O2)[C@@H](C3=C(Br)C(O)=CC(O)=C3)C4=C2C=CC(/C=C/C5=C(Br)C(OC)=CC(OC)=C5)=C4 | 640 | Halogenated derivative | >64   |
| 34 | 14'-chloro-11,13-di-O-methyl-trans- $\delta$ -viniferin           | OC(C=C1)=CC=C1[C@@H](O2)[C@@H](C3=C(Cl)C(O)=CC(O)=C3)C4=C2C=CC(/C=C/C5=CC(OC)=CC(OC)=C5)=C4     | 516 | Halogenated derivative | 1-2   |
| 35 | 14-chloro-11,13-di-O-methyl-trans- $\delta$ -viniferin            | OC(C=C1)=CC=C1[C@@H](O2)[C@@H](C3=CC(O)=CC(O)=C3)C4=C2C=CC(/C=C/C5=C(Cl)C(OC)=CC(OC)=C5)=C4     | 516 | Halogenated derivative | 2     |
| 36 | 12-chloro-11,13-di-O-methyl-trans- $\delta$ -viniferin            | OC(C=C1)=CC=C1[C@@H](O2)[C@@H](C3=CC(O)=CC(O)=C3)C4=C2C=CC(/C=C/C5=CC(OC)=C(Cl)C(OC)=C5)=C4     | 516 | Halogenated derivative | NA    |
| 37 | 14,14'-dichloro-11,13-di-O-methyl-trans- $\delta$ -viniferin      | OC(C=C1)=CC=C1[C@@H](O2)[C@@H](C3=C(Cl)C(O)=CC(O)=C3)C4=C2C=CC(/C=C/C5=C(Cl)C(OC)=CC(OC)=C5)=C4 | 551 | Halogenated derivative | 2-4   |
| 38 | 14'-iodo-11,13-di-O-methyl-trans- $\delta$ -viniferin             | OC(C=C1)=CC=C1[C@@H](O2)[C@@H](C3=C(I)C(O)=CC(O)=C3)C4=C2C=CC(/C=C/C5=CC(OC)=CC(OC)=C5)=C4      | 608 | Halogenated derivative | NA    |
| 39 | 12'-iodo-11,13-di-O-methyl-trans- $\delta$ -viniferin             | OC(C=C1)=CC=C1[C@@H](O2)[C@@H](C3=CC(O)=C(I)C(O)=C3)C4=C2C=CC(/C=C/C5=CC(OC)=CC(OC)=C5)=C4      | 608 | Halogenated derivative | 4     |
| 40 | 12-bromo-11,11',13,13'-tetra-O-methyl-trans- $\delta$ -viniferin  | OC(C=C1)=CC=C1[C@@H](O2)[C@@H](C3=CC(OC)=CC(OC)=C3)C4=C2C=CC(/C=C/C5=CC(OC)=C(Br)C(OC)=C5)=C4   | 589 | Halogenated derivative | >64   |
| 41 | 14-bromo-11,11',13,13'-tetra-O-methyl-trans- $\delta$ -viniferin  | OC(C=C1)=CC=C1[C@@H](O2)[C@@H](C3=CC(OC)=CC(OC)=C3)C4=C2C=CC(/C=C/C5=C(Br)C(OC)=CC(OC)=C5)=C4   | 589 | Halogenated derivative | >64   |
| 42 | 14-chloro-11,11',13,13'-tetra-O-methyl-trans- $\delta$ -viniferin | OC(C=C1)=CC=C1[C@@H](O2)[C@@H](C3=CC(OC)=CC(OC)=C3)C4=C2C=CC(/C=C/C5=C(Cl)C(OC)=CC(OC)=C5)=C4   | 545 | Halogenated derivative | >64   |
| 43 | 14-iodo-11,11',13,13'-tetra-O-methyl-trans- $\delta$ -viniferin   | OC(C=C1)=CC=C1[C@@H](O2)[C@@H](C3=CC(OC)=CC(OC)=C3)C4=C2C=CC(/C=C/C5=C(I)C(OC)=CC(OC)=C5)=C4    | 636 | Halogenated derivative | >64   |
| 44 | 12-iodo-11,11',13,13'-tetra-O-methyl-trans- $\delta$ -viniferin   | OC(C=C1)=CC=C1[C@@H](O2)[C@@H](C3=CC(OC)=CC(OC)=C3)C4=C2C=CC(/C=C/C5=CC(OC)=C(I)C(OC)=C5)=C4    | 636 | Halogenated derivative | >64   |

## **NMR Data**

**Pages 25 to 126:**  $^1\text{H}$ , COSY,  $^{13}\text{C}$ , HSQC, HMBC and ROESY spectra of compounds **5** to **44**

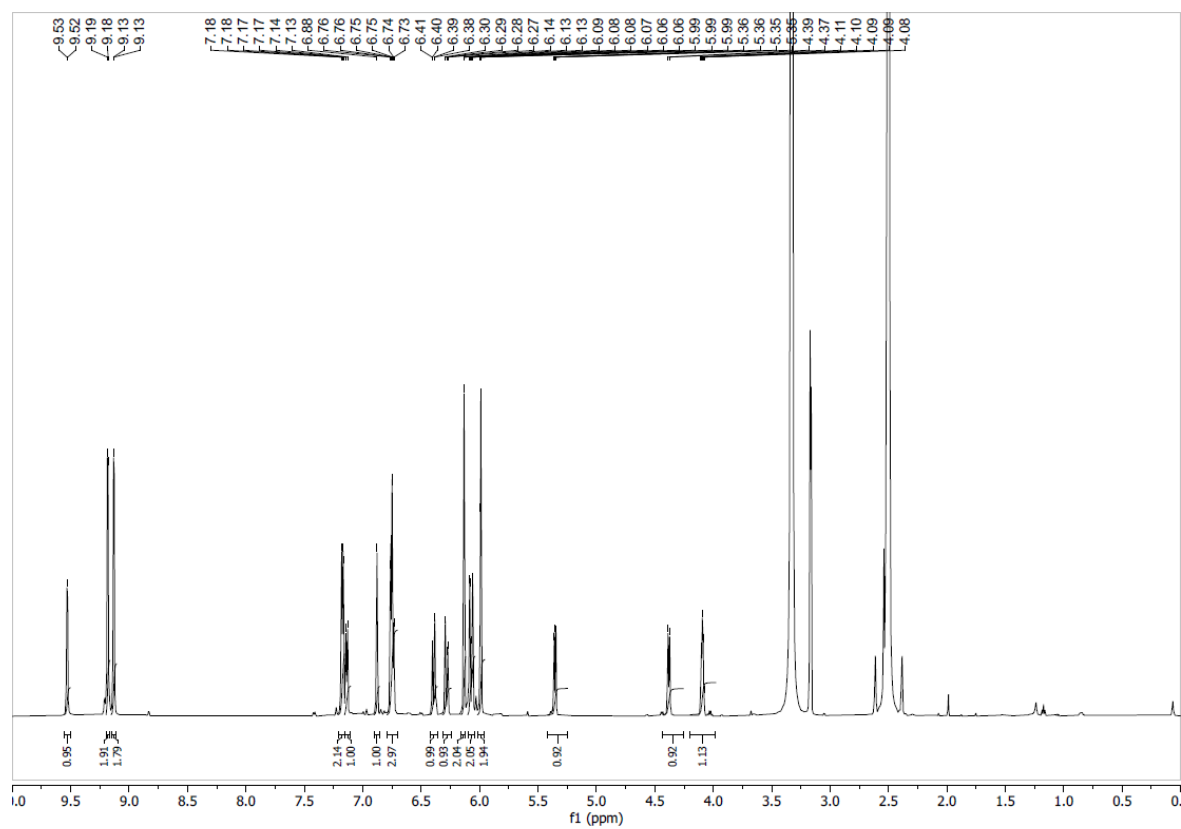

$^1\text{H}$  NMR spectrum of compound **5** in  $\text{DMSO-}d_6$  at 600 MHz

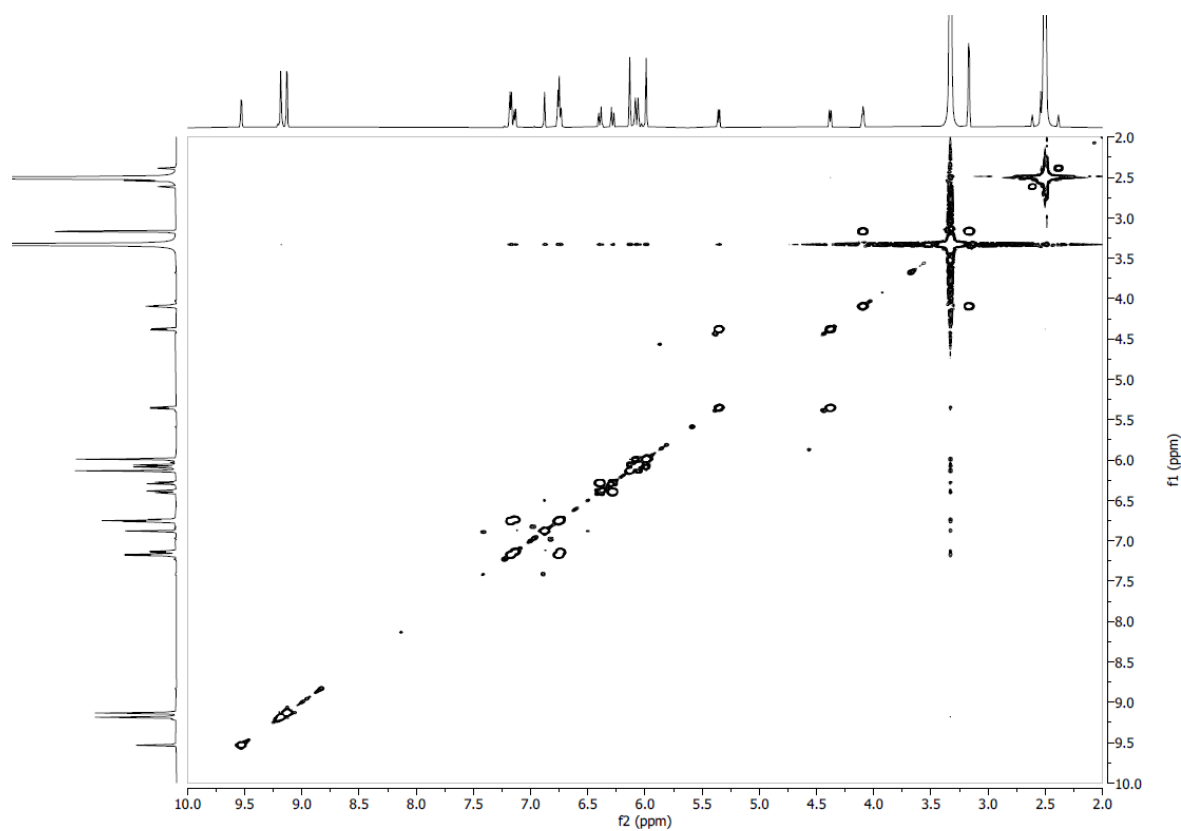

COSY NMR spectrum of compound **5** in  $\text{DMSO-}d_6$

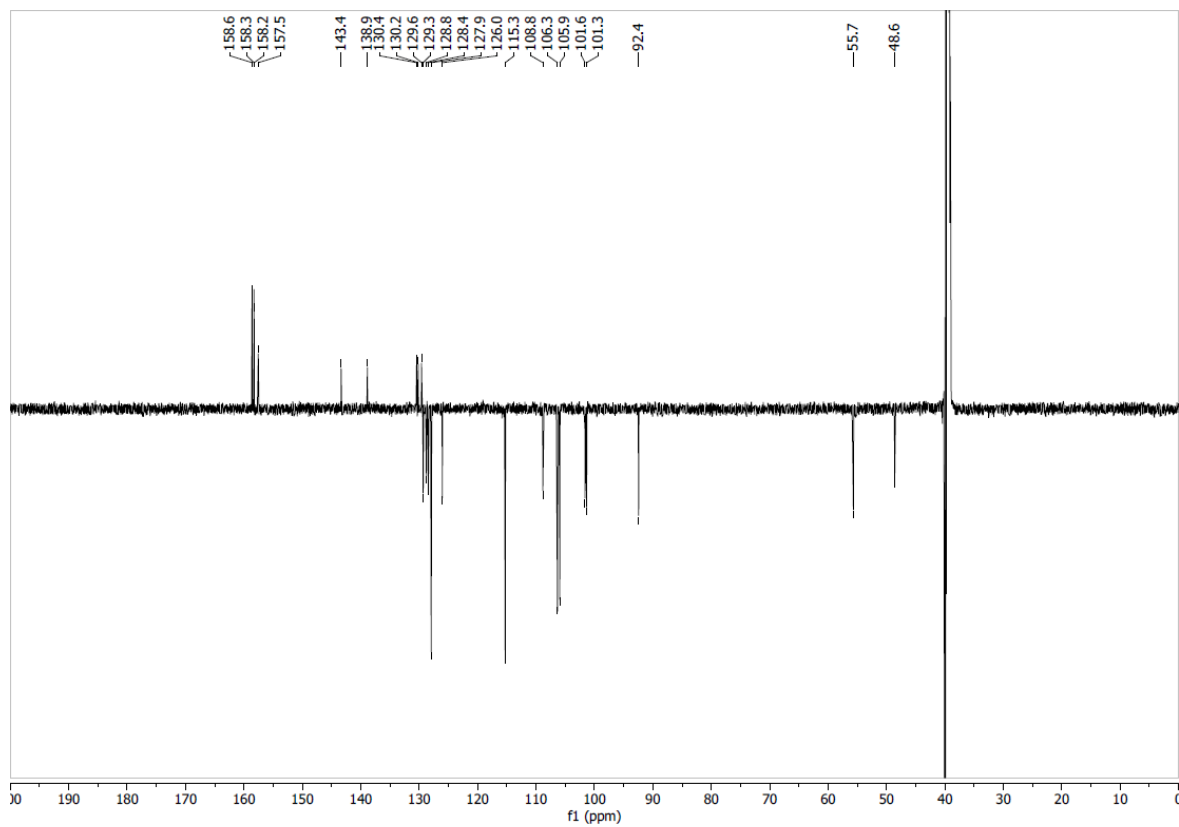

$^{13}\text{C}$ -DEPTQ NMR spectrum of compound **5** in  $\text{DMSO-}d_6$  at 151 MHz

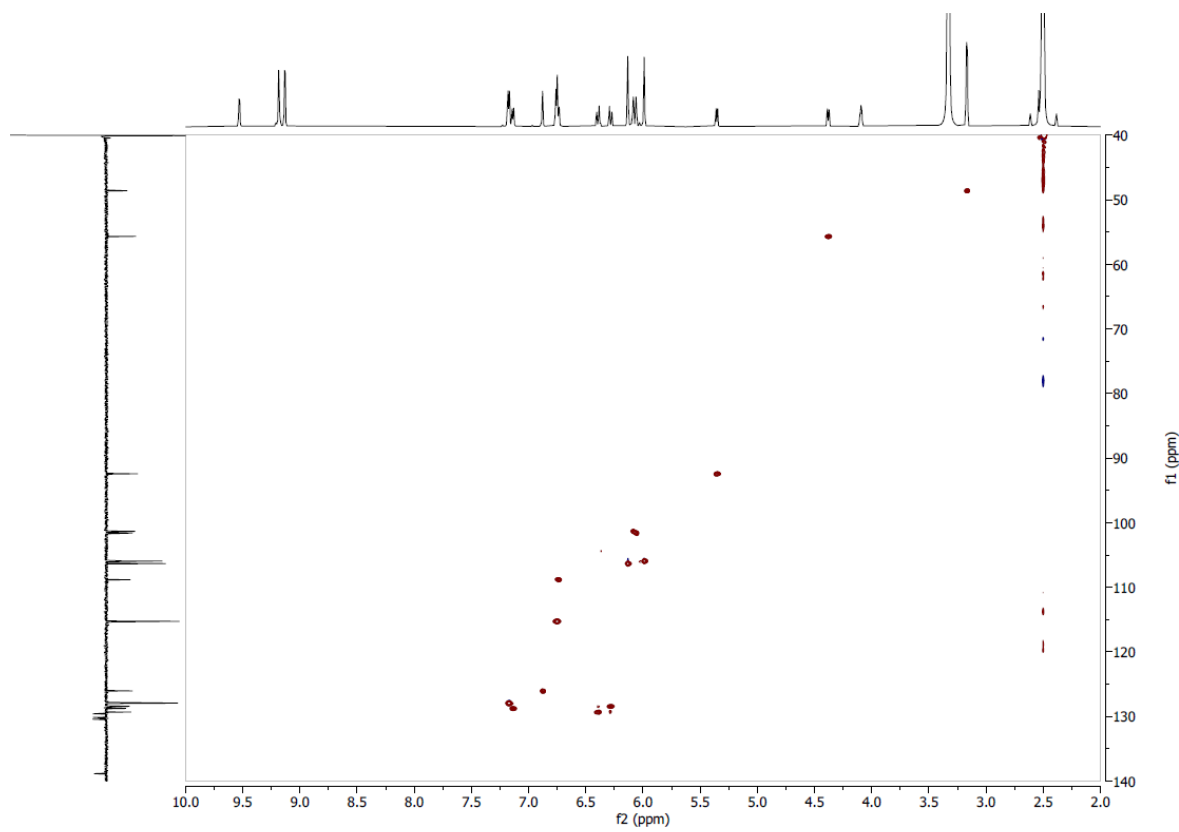

Edited HSQC NMR spectrum of compound **5** in  $\text{DMSO-}d_6$

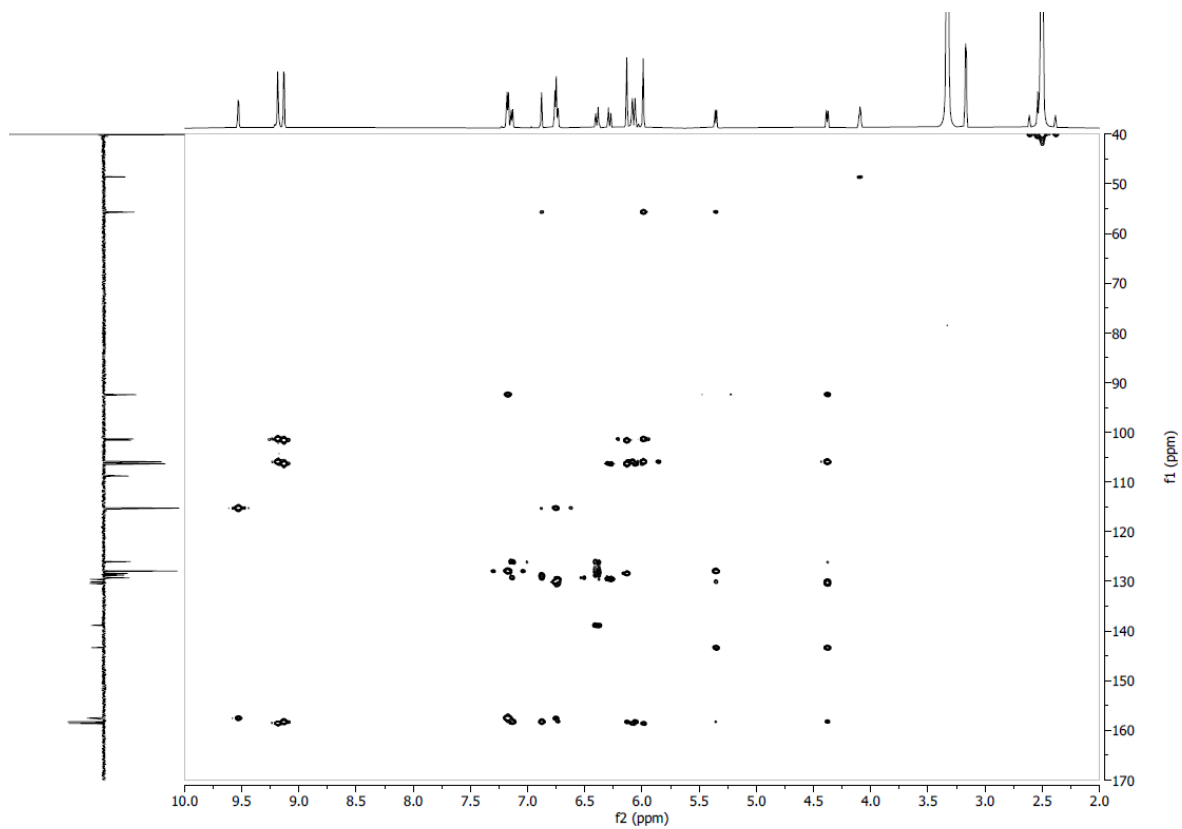

HMBC NMR spectrum of compound **5** in DMSO- $d_6$

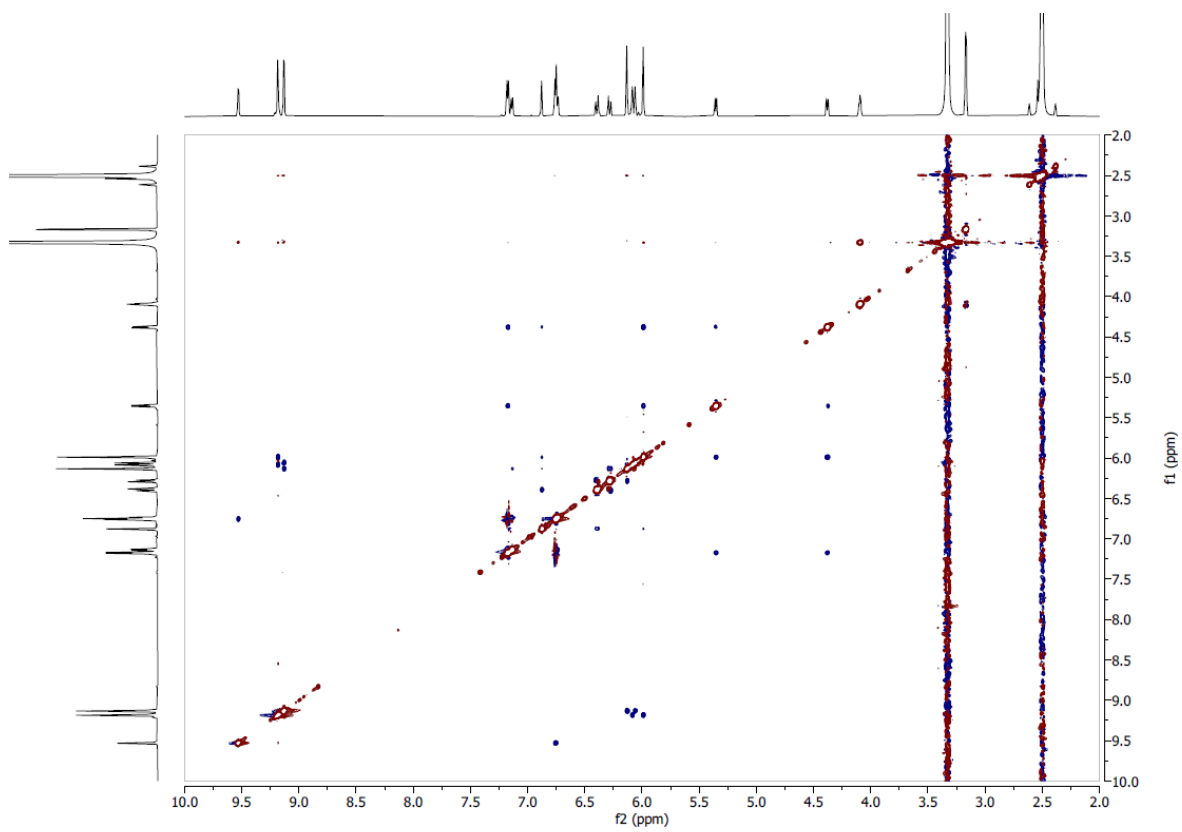

ROESY NMR spectrum of compound **5** in DMSO- $d_6$

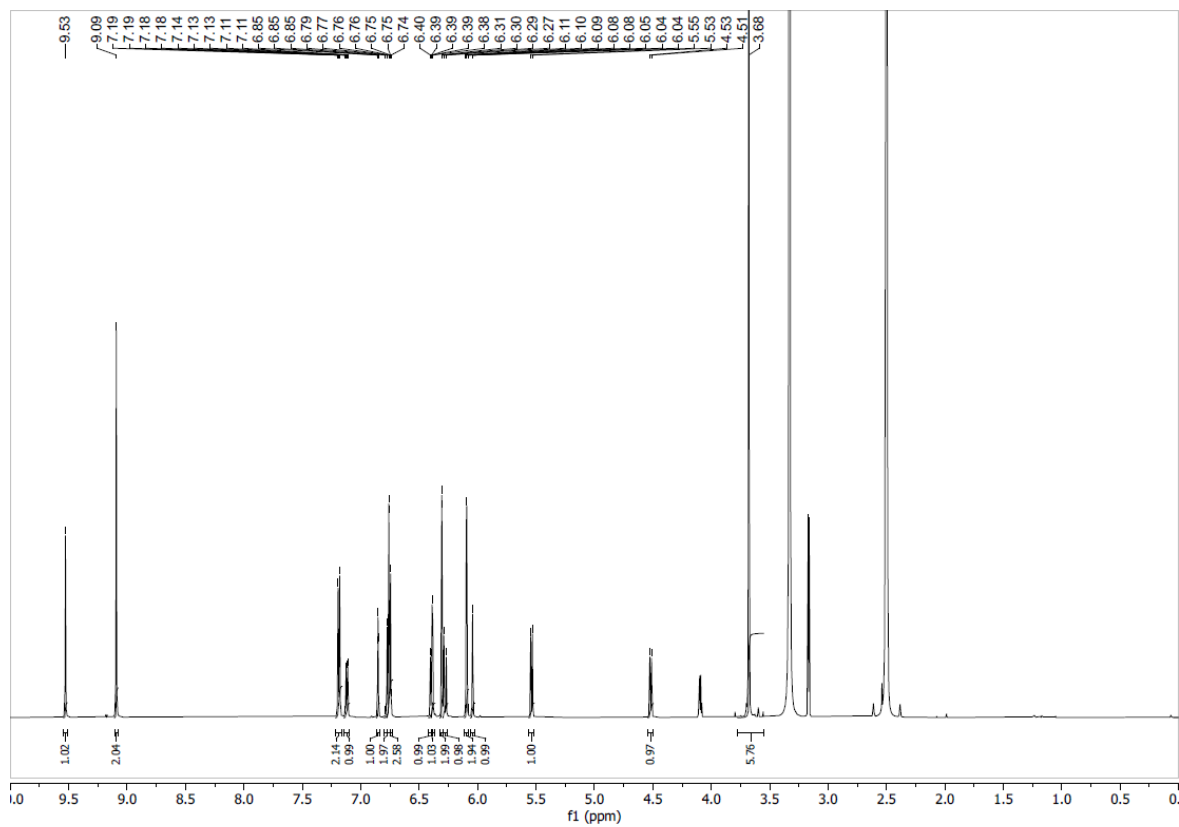

$^1\text{H}$  NMR spectrum of compound **6** in  $\text{DMSO-}d_6$  at 600 MHz

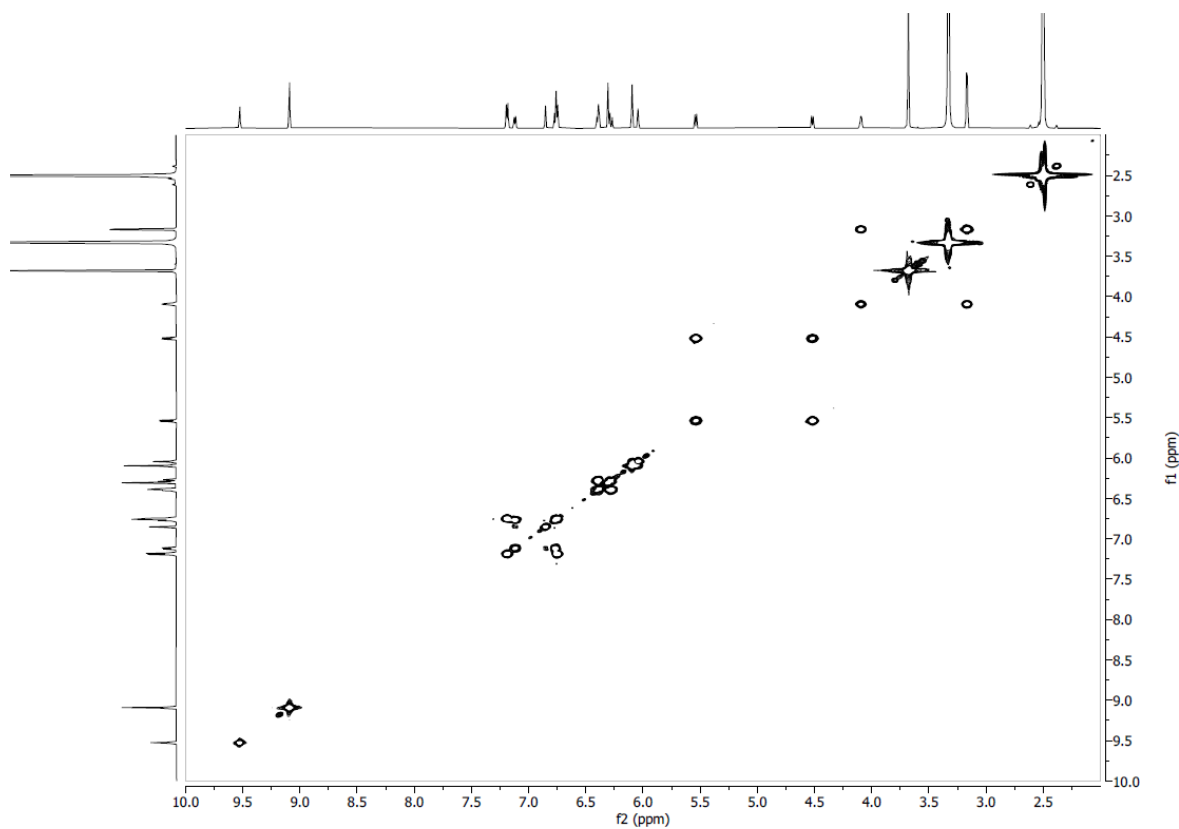

COSY NMR spectrum of compound **6** in  $\text{DMSO-}d_6$



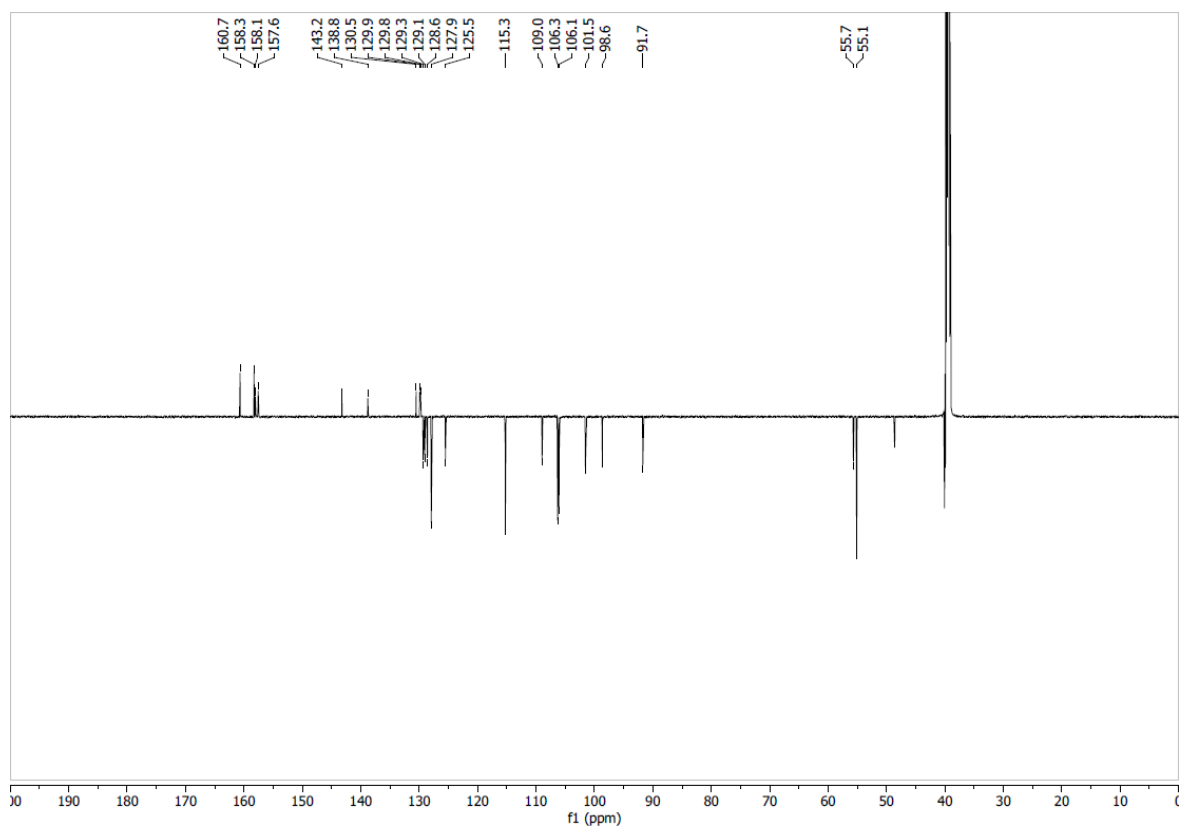

$^{13}\text{C}$ -DEPTQ NMR spectrum of compound **6** in  $\text{DMSO-}d_6$  at 151 MHz

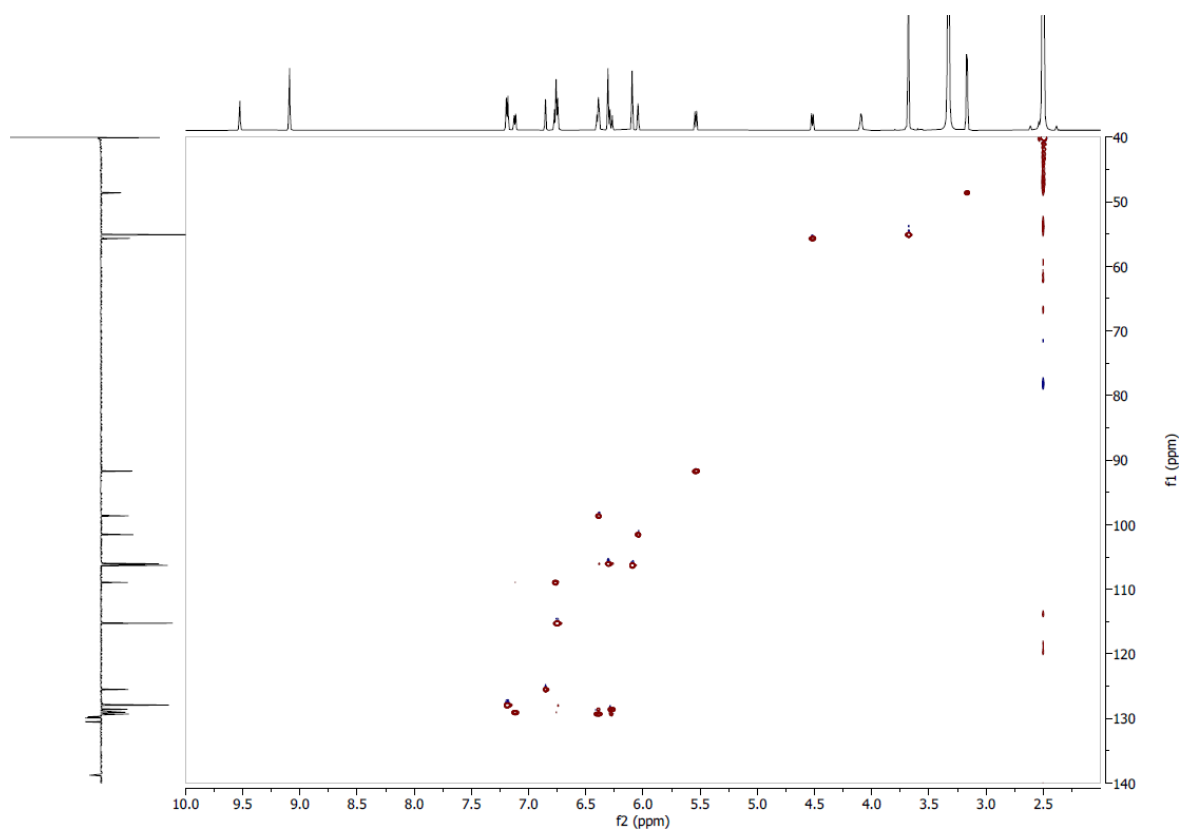

Edited HSQC NMR spectrum of compound **6** in  $\text{DMSO-}d_6$

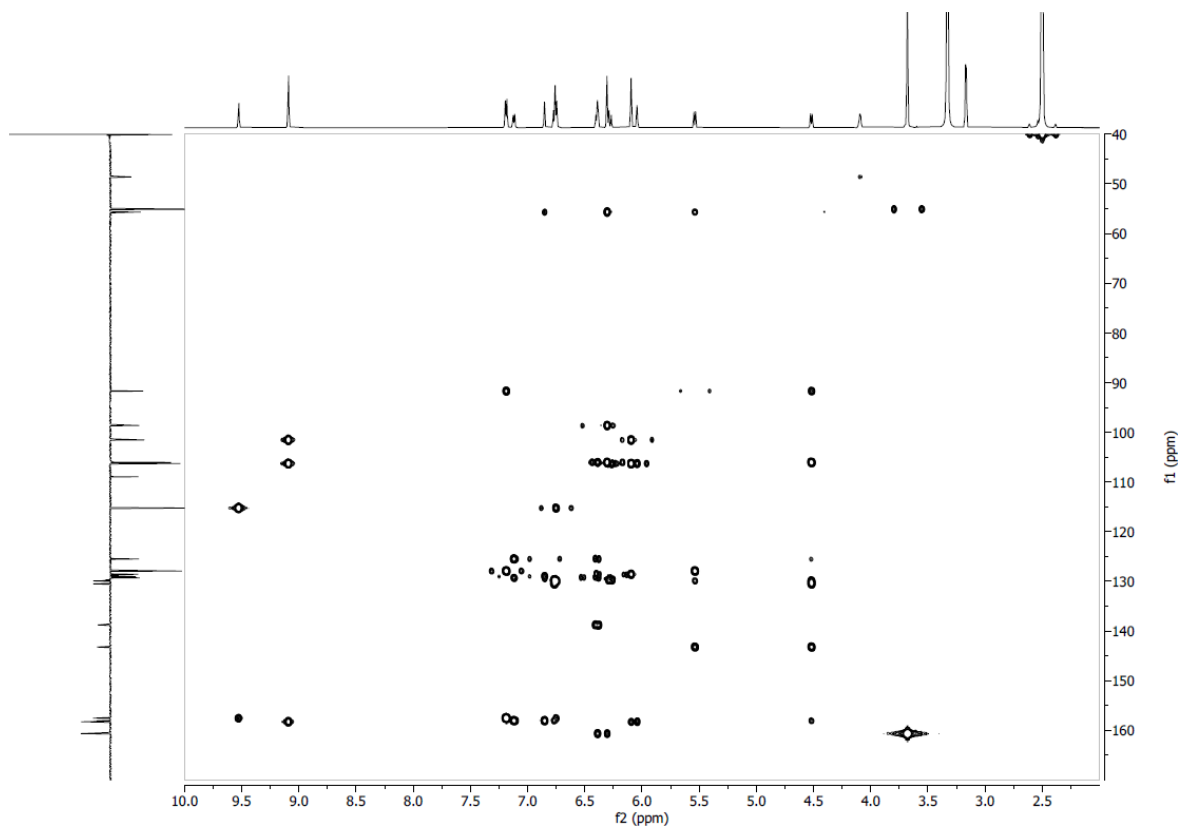

HMBC NMR spectrum of compound **6** in DMSO- $d_6$

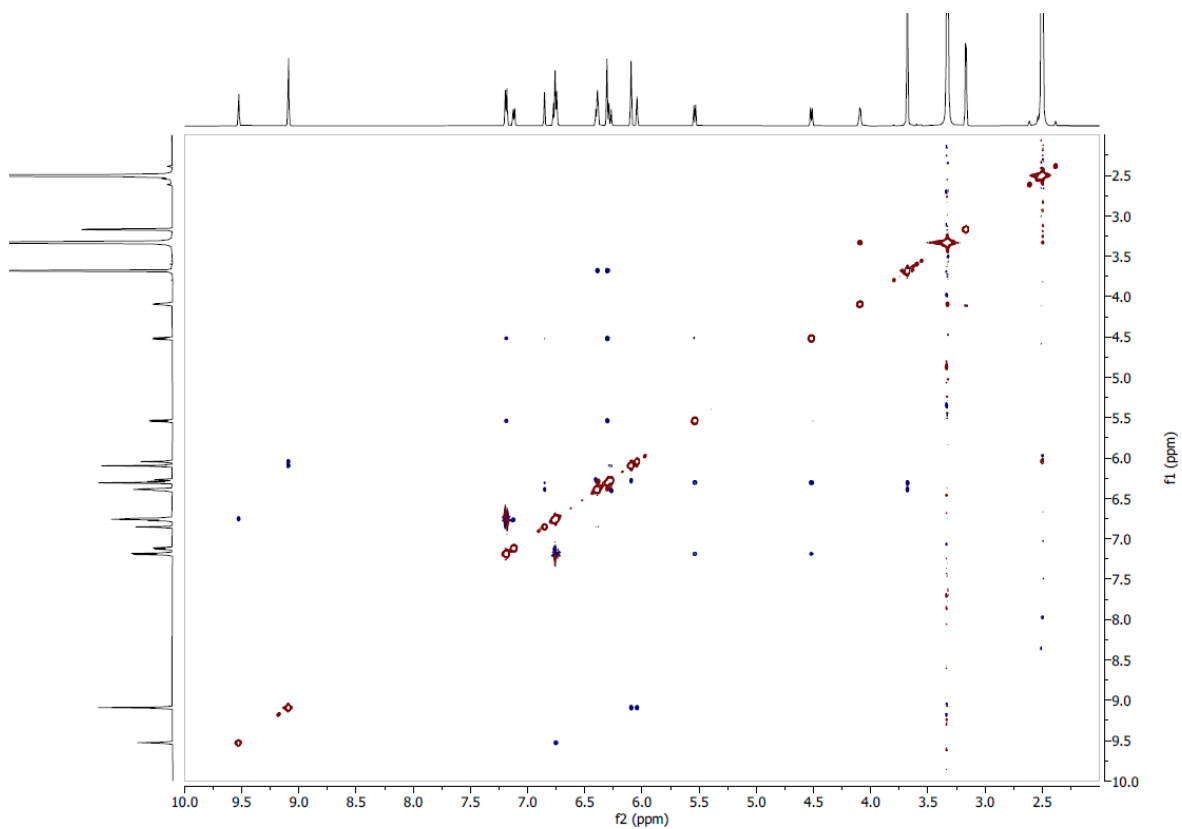

ROESY NMR spectrum of compound **6** in DMSO- $d_6$

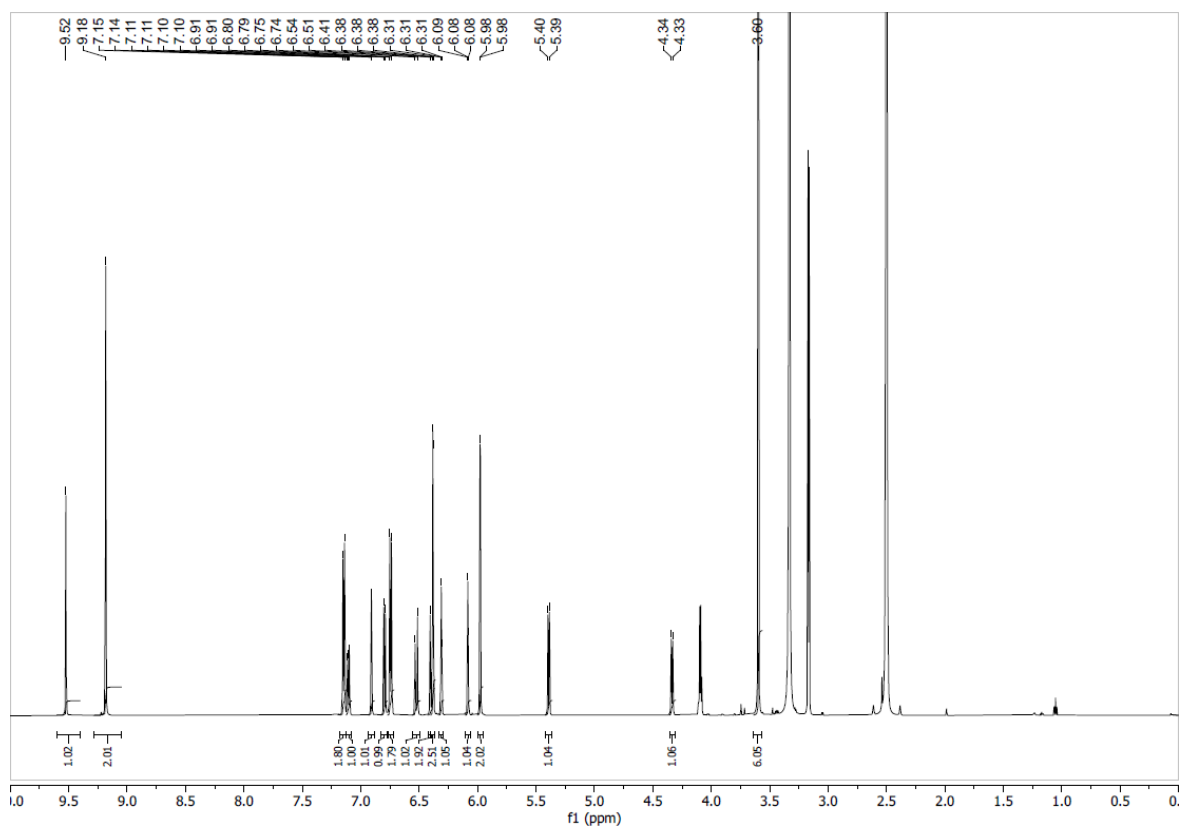

$^1\text{H}$  NMR spectrum of compound **7** in  $\text{DMSO-}d_6$  at 600 MHz

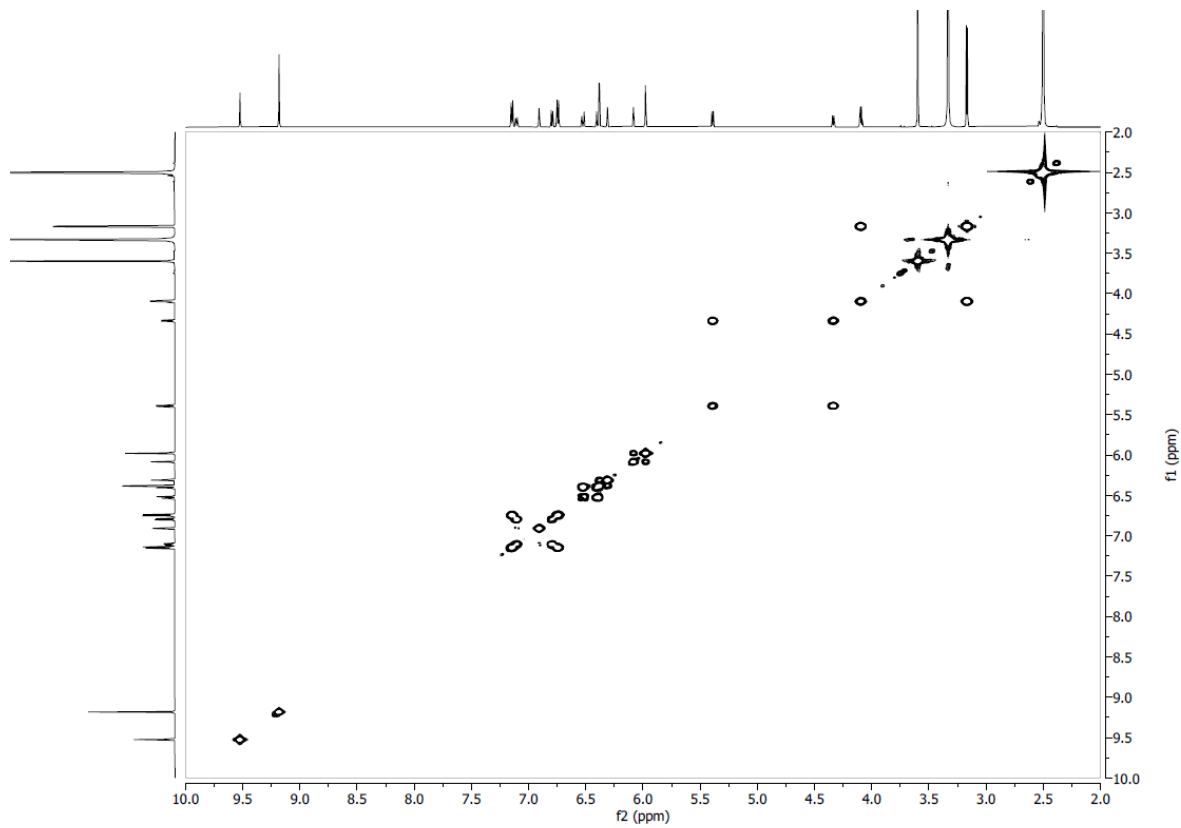

COSY NMR spectrum of compound **7** in  $\text{DMSO-}d_6$

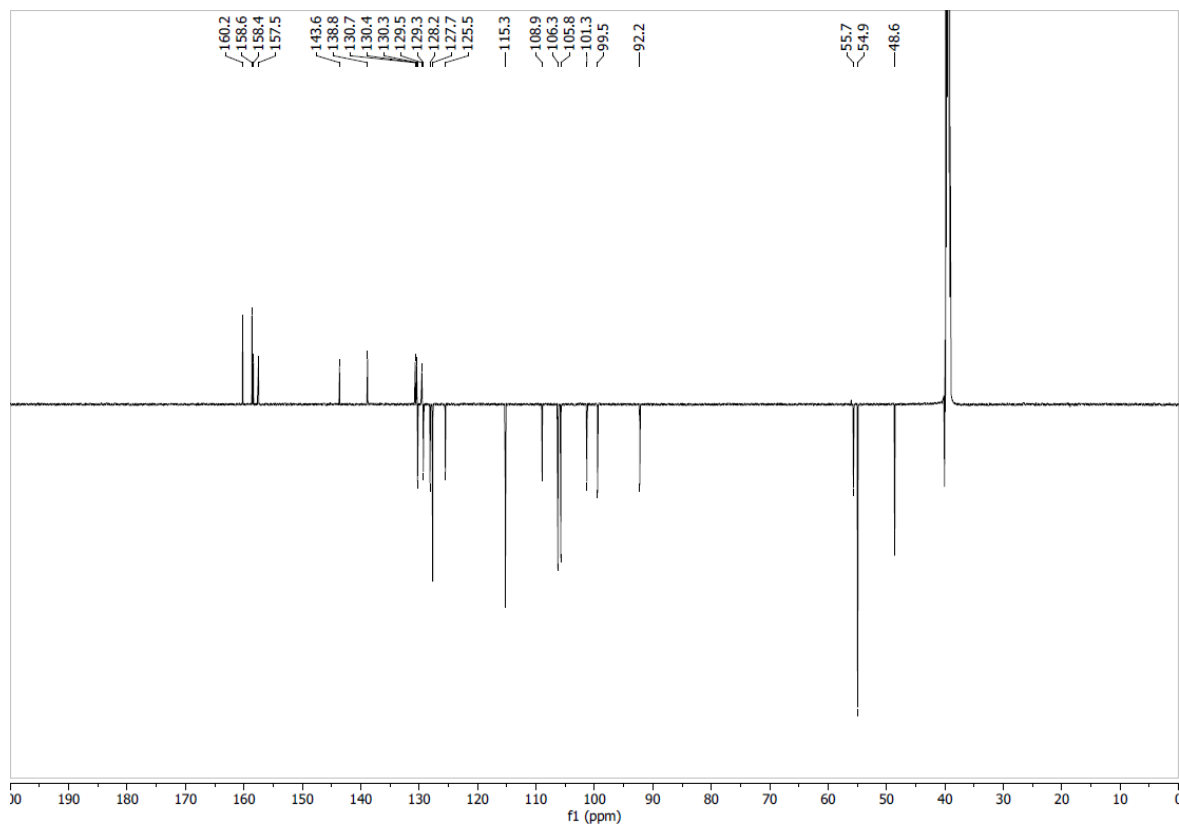

$^{13}\text{C}$ -DEPTQ NMR spectrum of compound **7** in  $\text{DMSO-}d_6$  at 151 MHz

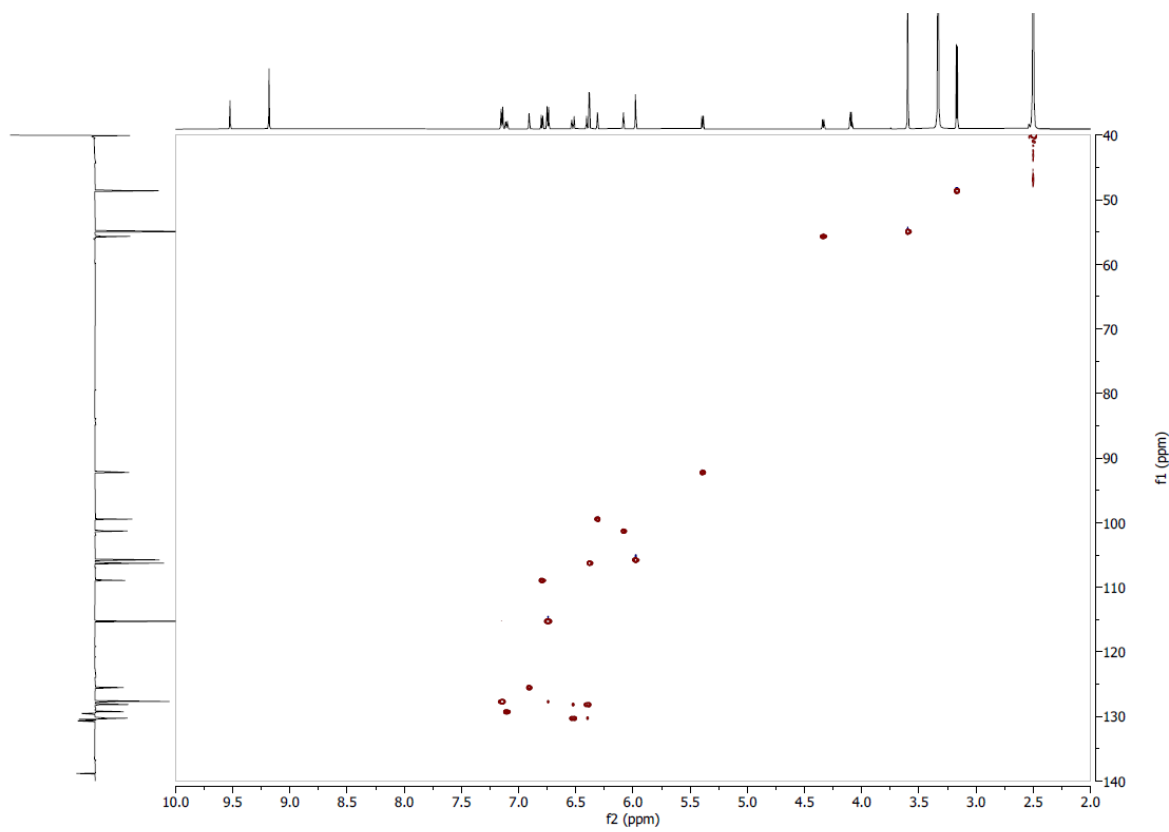

Edited HSQC NMR spectrum of compound **7** in  $\text{DMSO-}d_6$

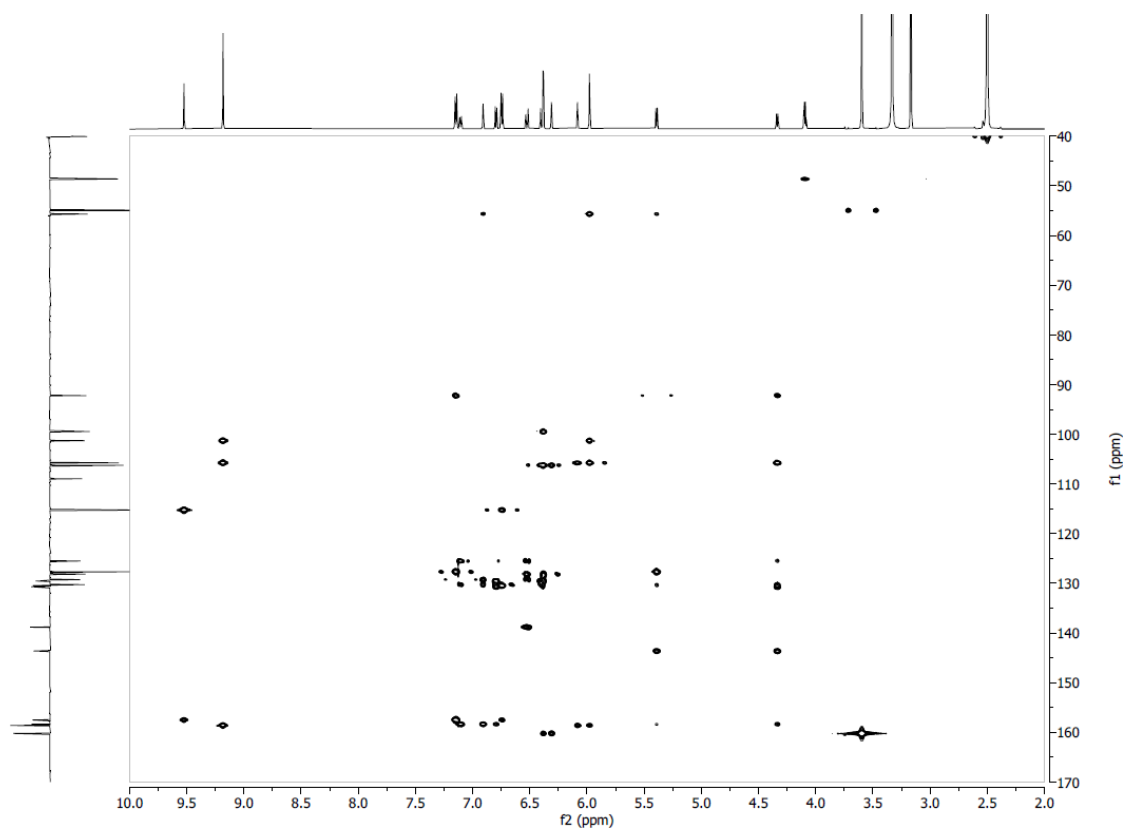

HMBC NMR spectrum of compound **7** in DMSO-*d*<sub>6</sub>

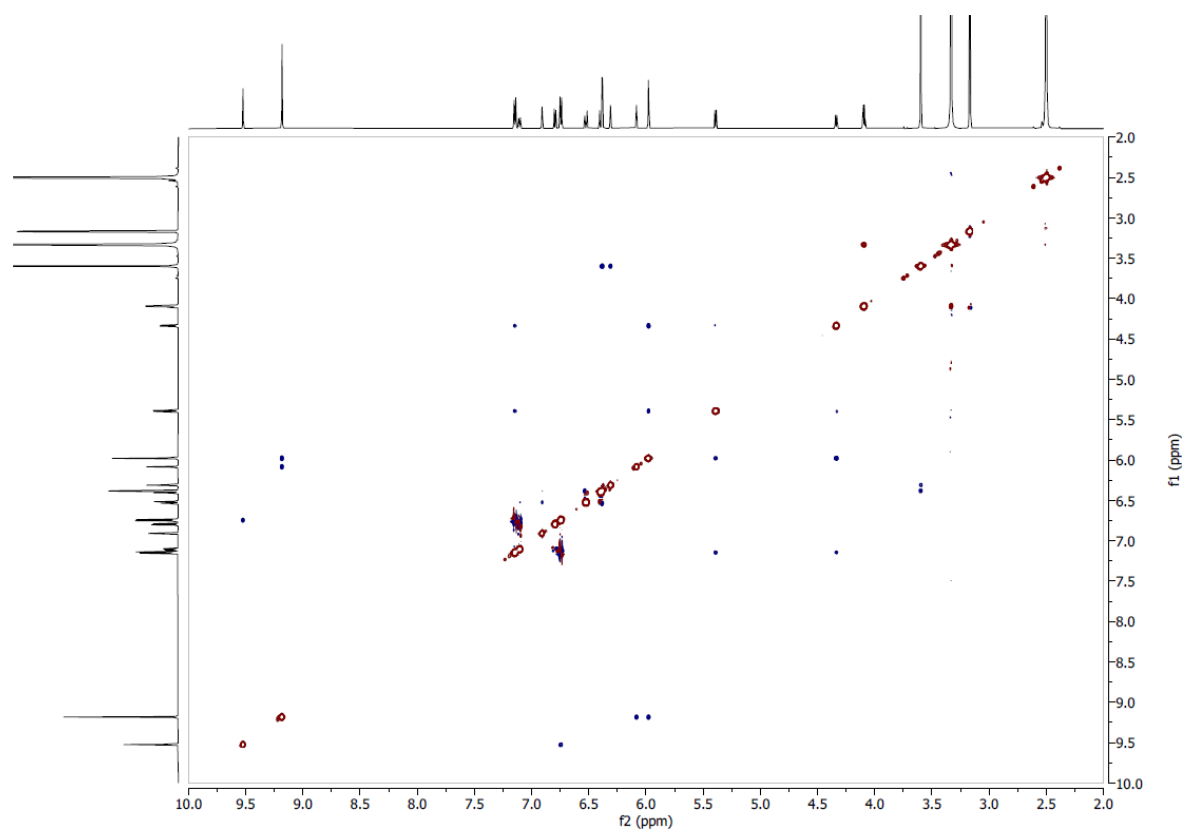

ROESY NMR spectrum of compound **7** in DMSO-*d*<sub>6</sub>

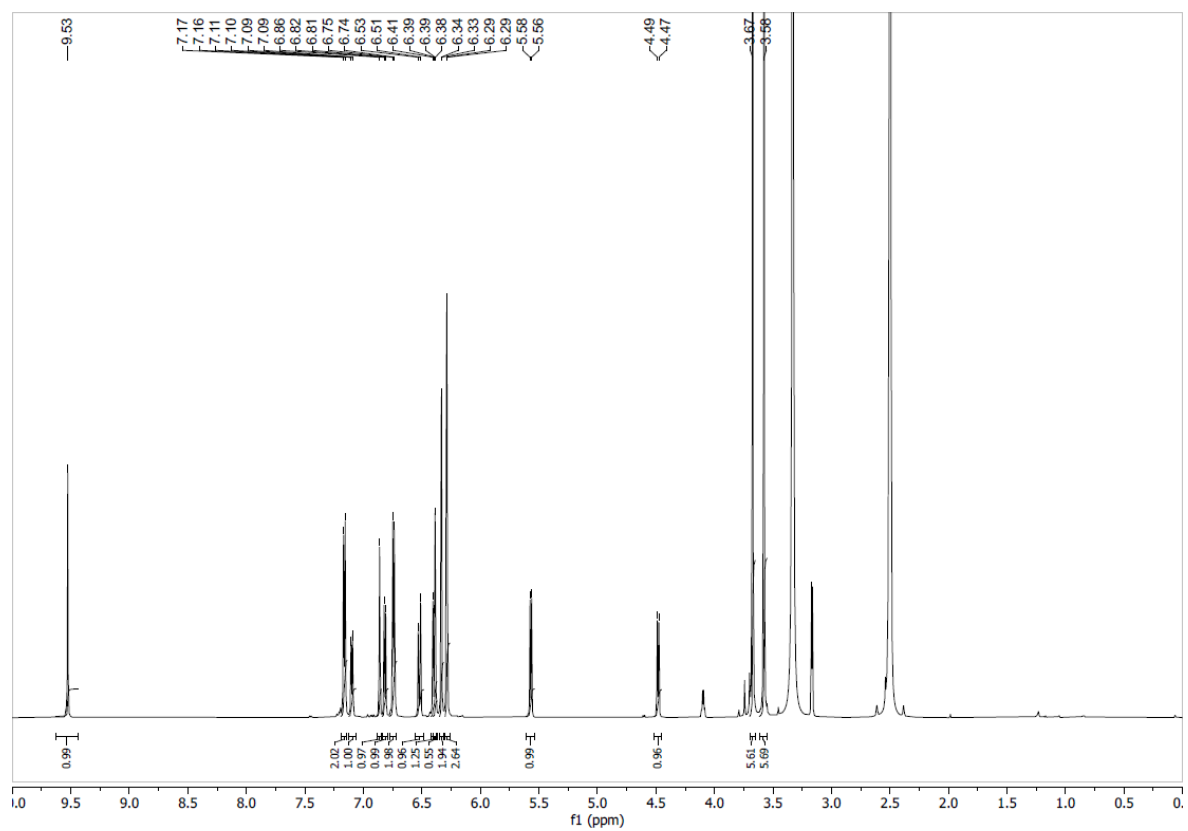

$^1\text{H}$  NMR spectrum of compound **8** in  $\text{DMSO-}d_6$  at 600 MHz

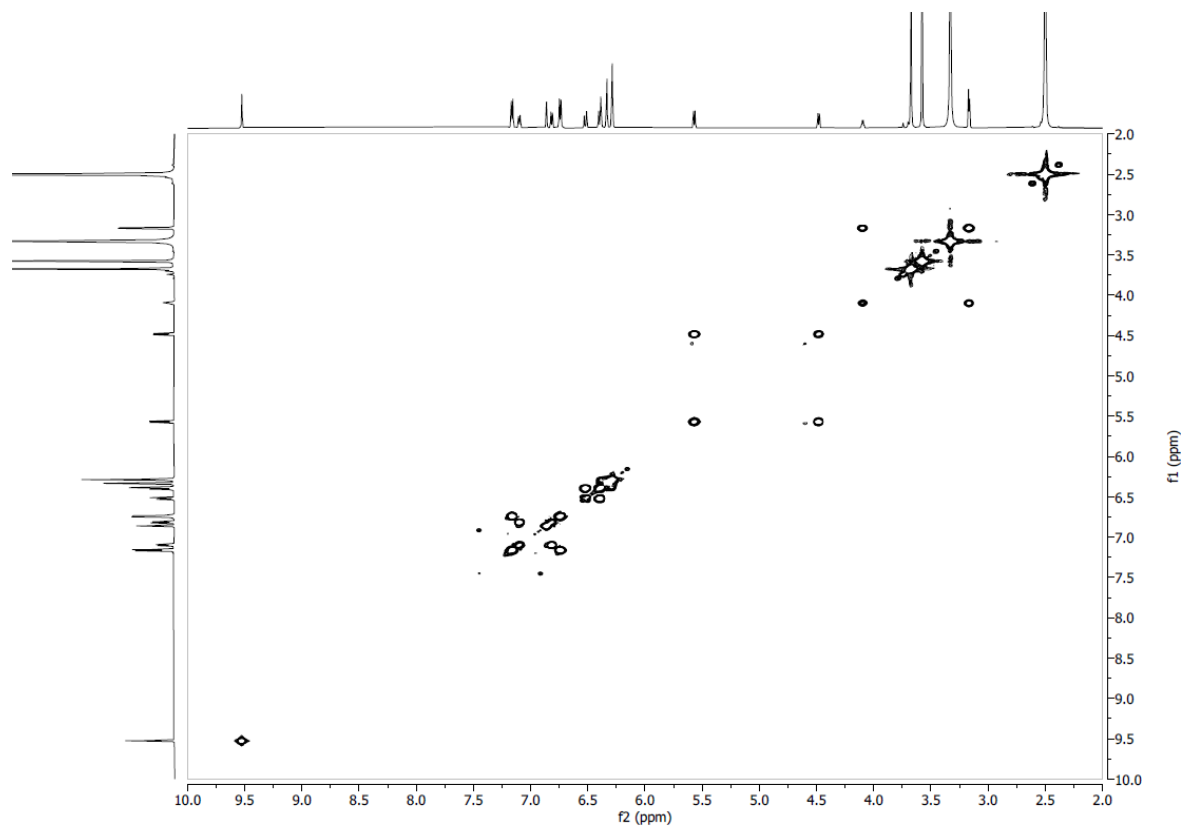

COSY NMR spectrum of compound **8** in  $\text{DMSO-}d_6$

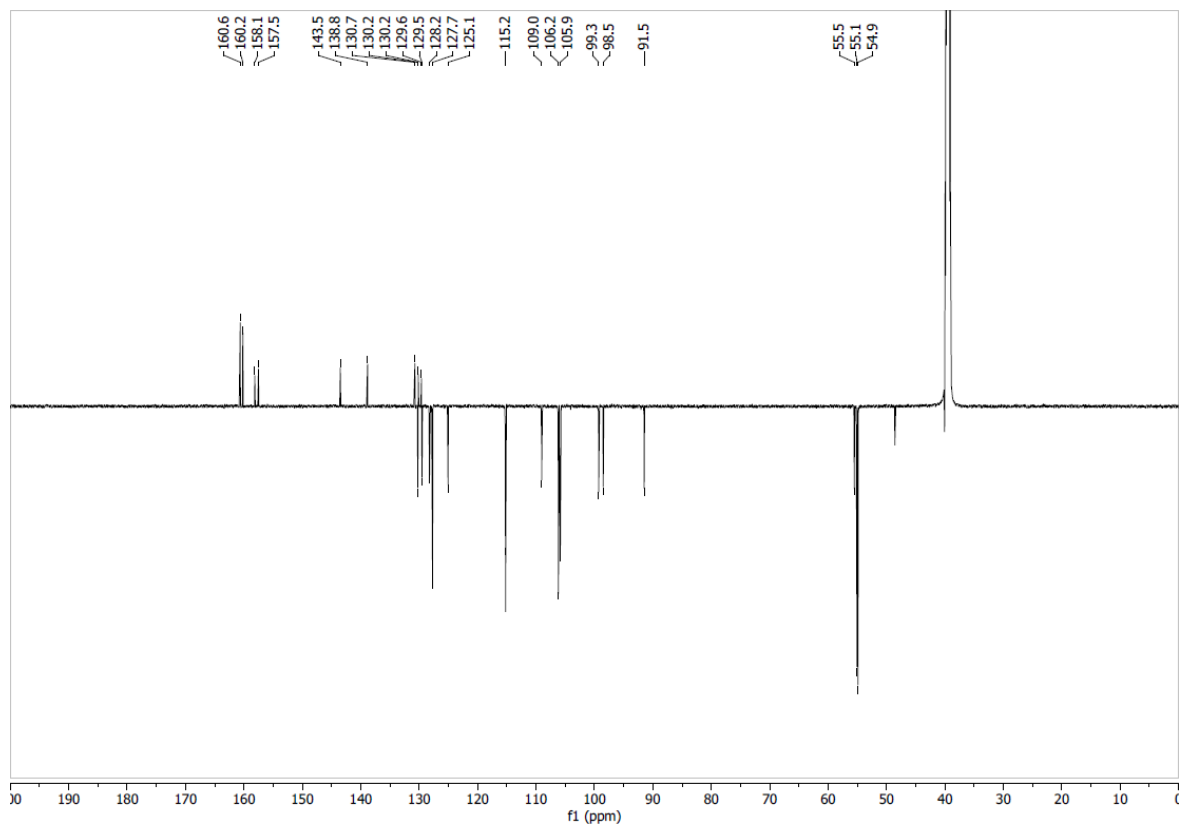

$^{13}\text{C}$ -DEPTQ NMR spectrum of compound **8** in  $\text{DMSO-}d_6$  at 151 MHz

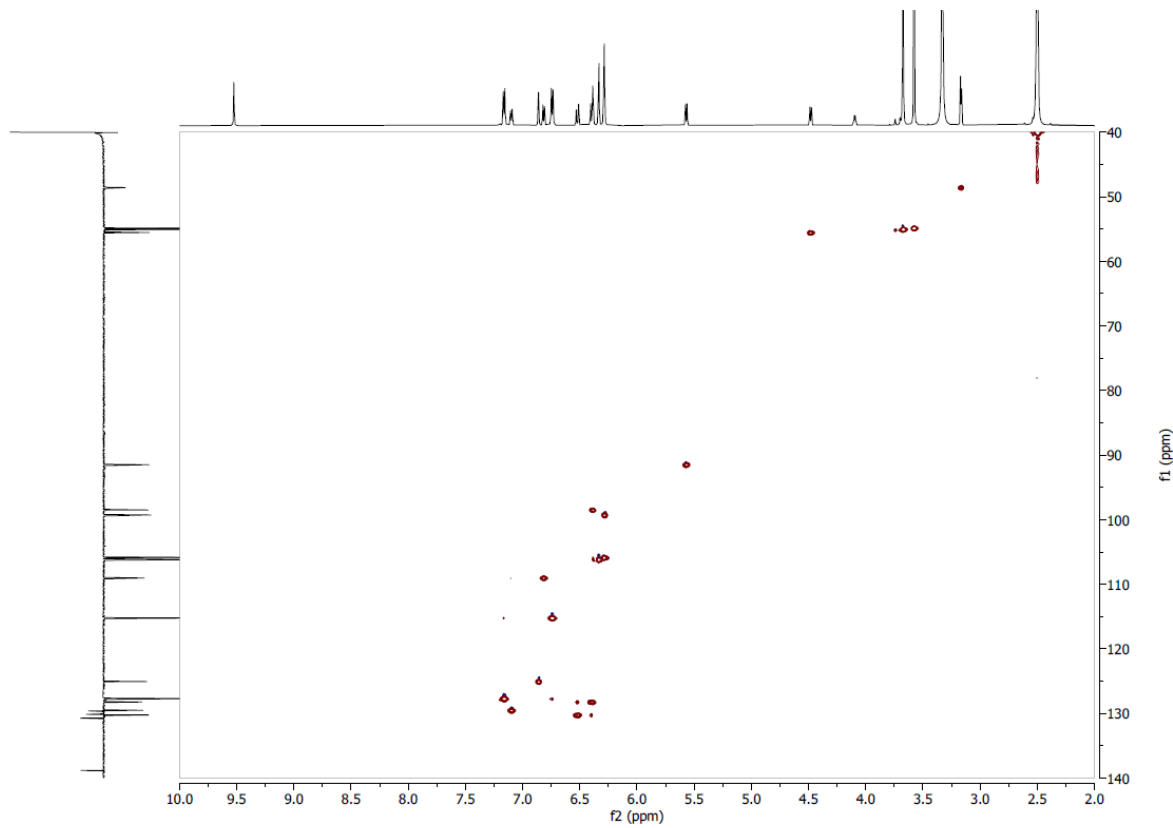

Edited HSQC NMR spectrum of compound **8** in  $\text{DMSO-}d_6$

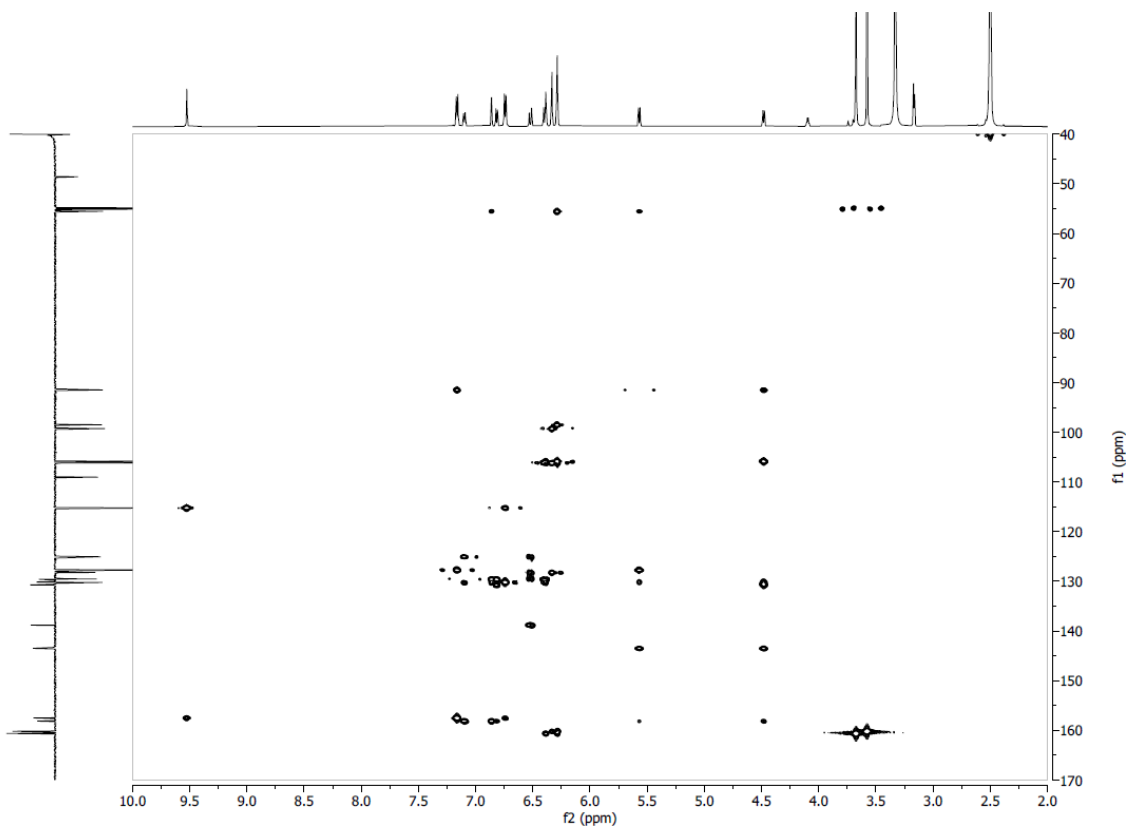

HMBC NMR spectrum of compound **8** in DMSO-*d*<sub>6</sub>

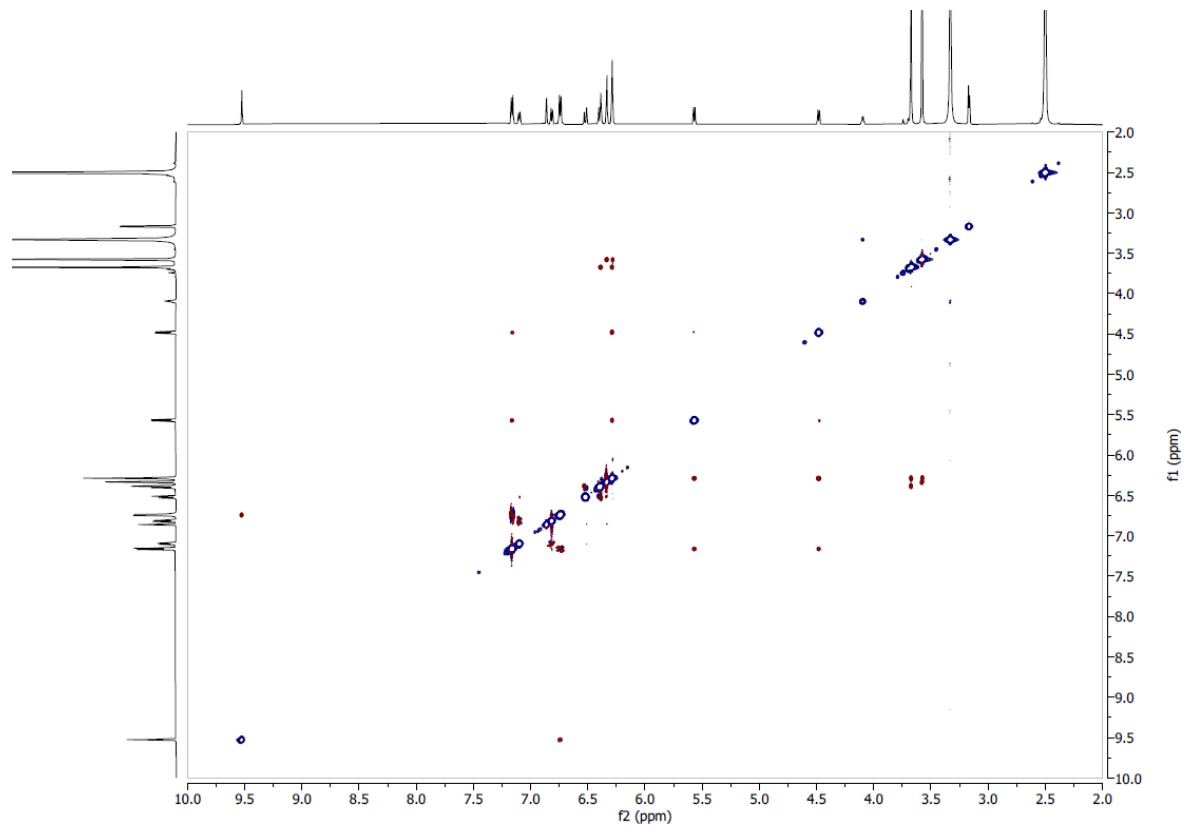

ROESY NMR spectrum of compound **8** in DMSO-*d*<sub>6</sub>



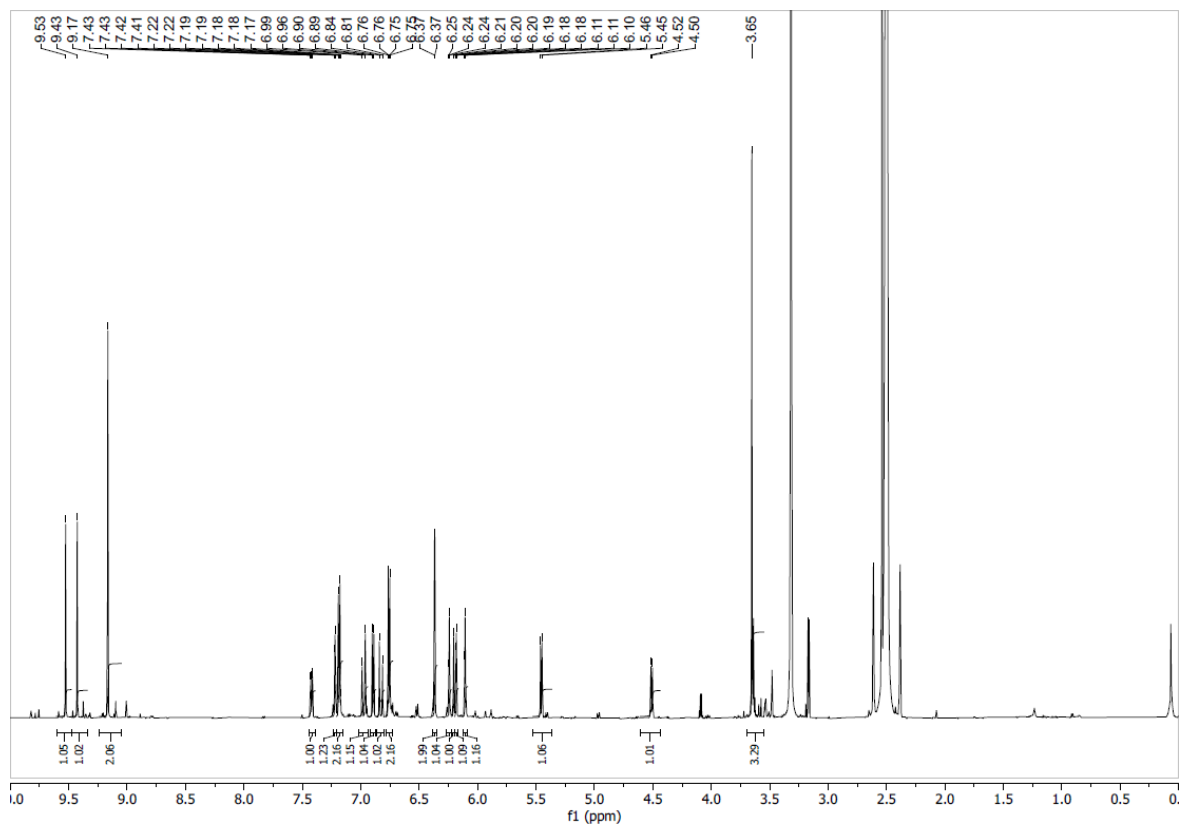

$^1\text{H}$  NMR spectrum of compound **9** in  $\text{DMSO-}d_6$  at 600 MHz

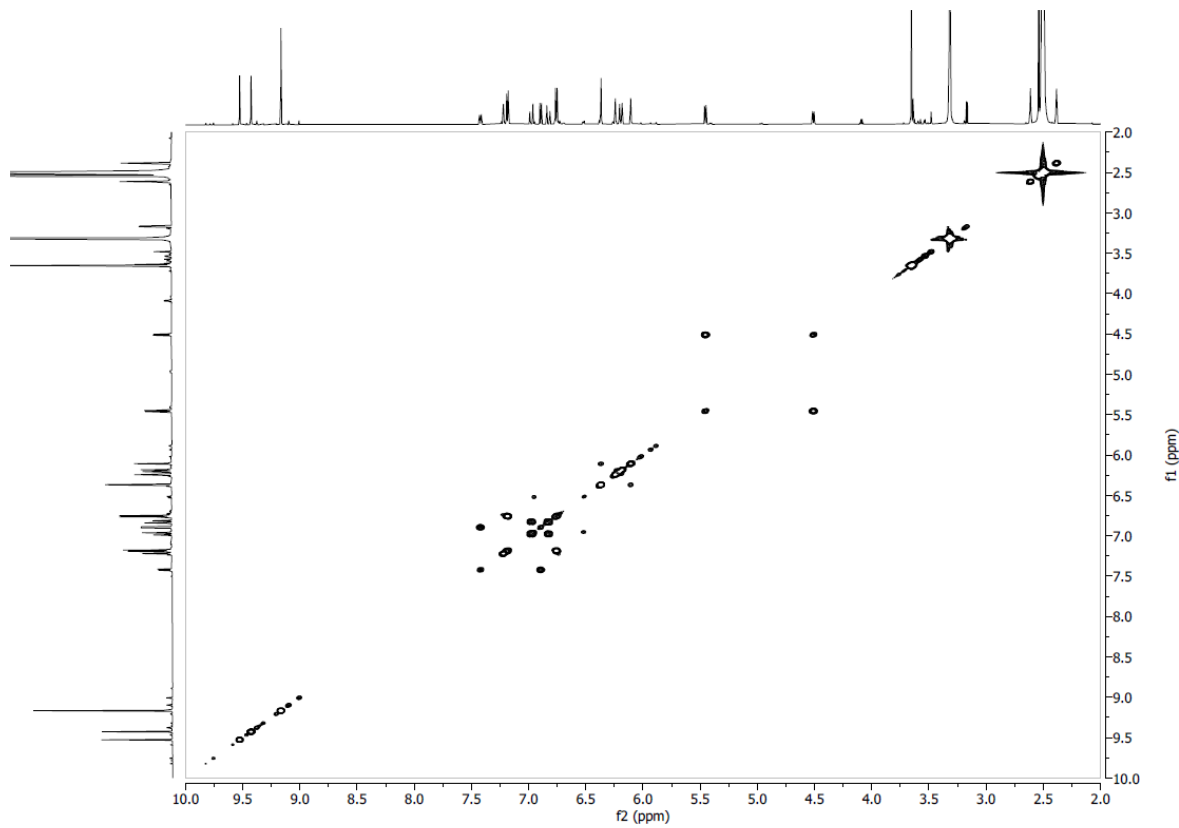

COSY NMR spectrum of compound **9** in  $\text{DMSO-}d_6$

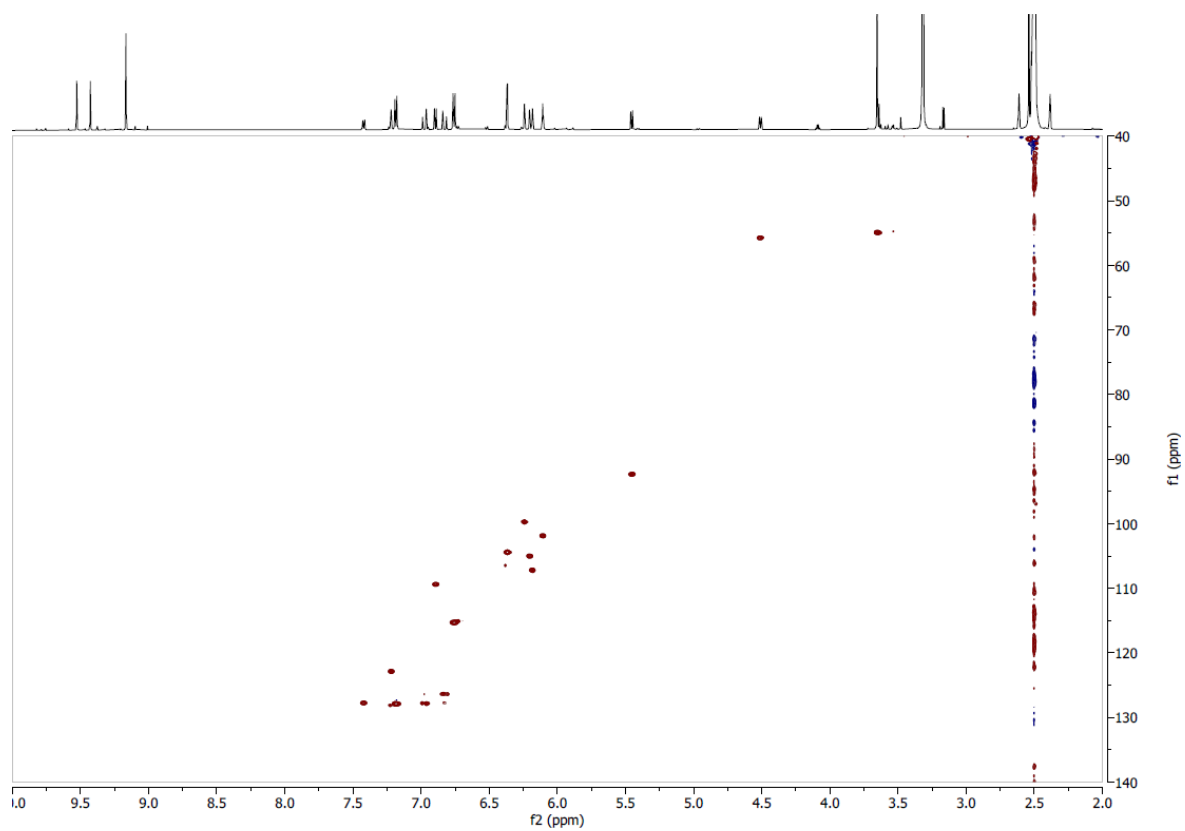

Edited HSQC NMR spectrum of compound **9** in DMSO- $d_6$

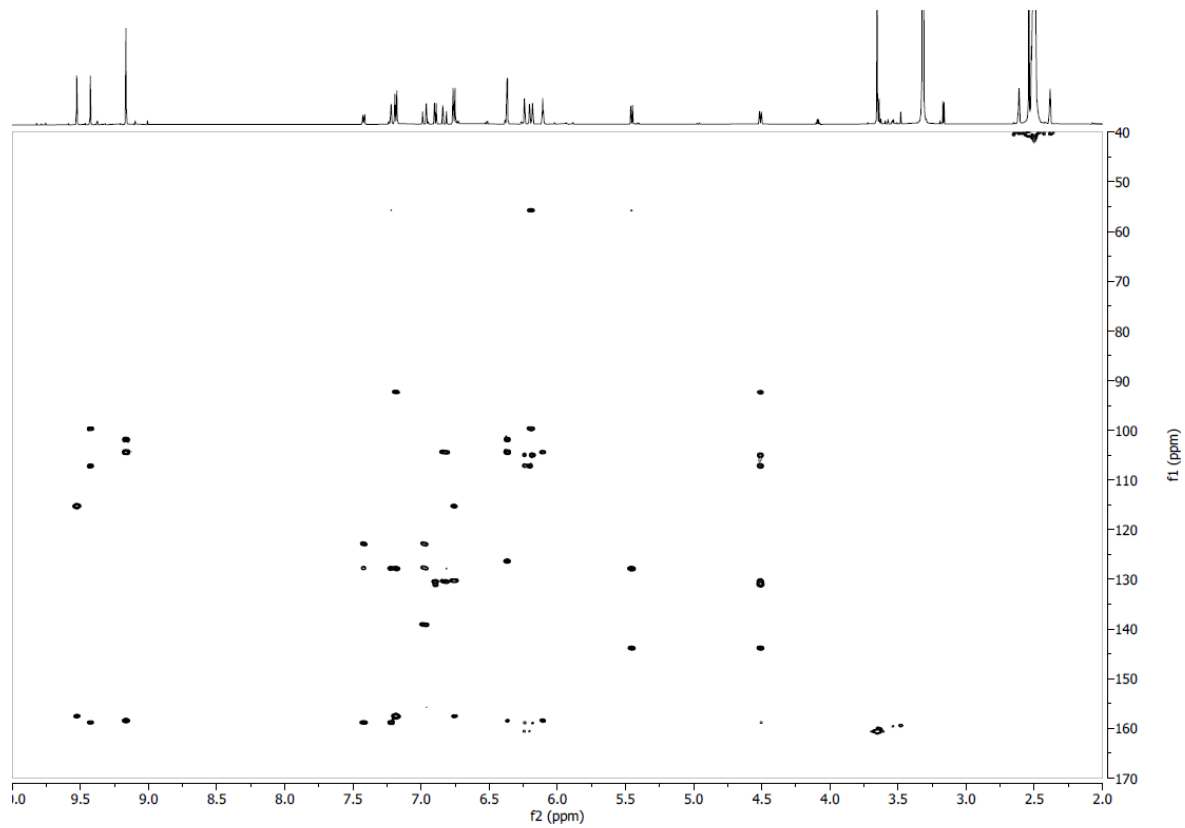

HMBC NMR spectrum of compound **9** in DMSO- $d_6$

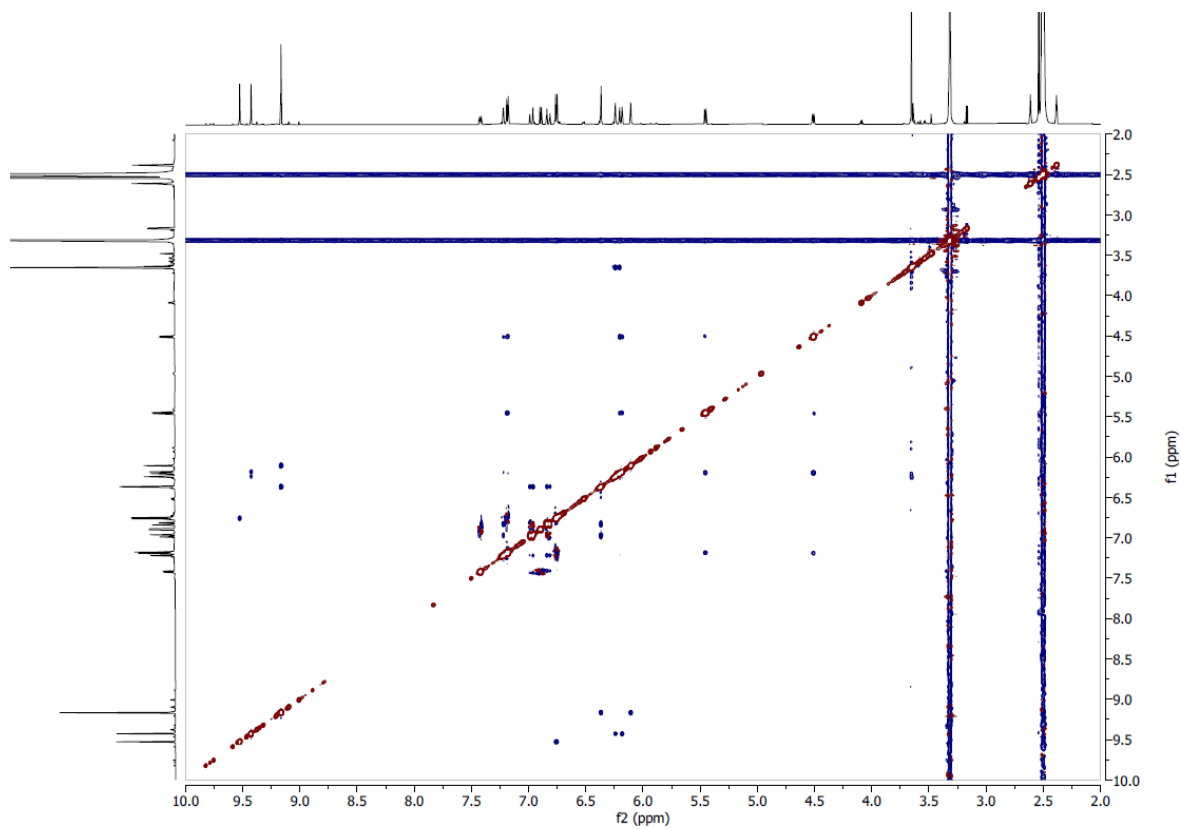

ROESY NMR spectrum of compound **9** in DMSO- $d_6$

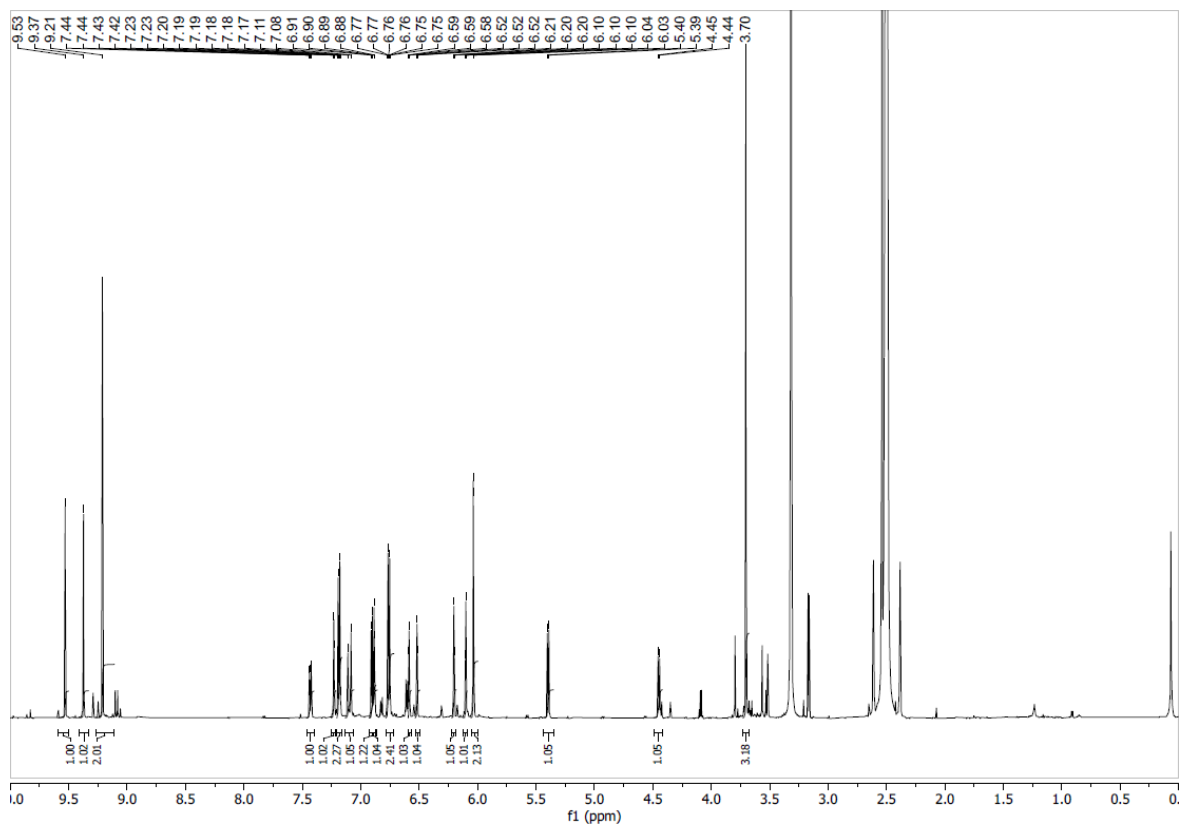

$^1\text{H}$  NMR spectrum of compound **10** in DMSO- $d_6$  at 600 MHz

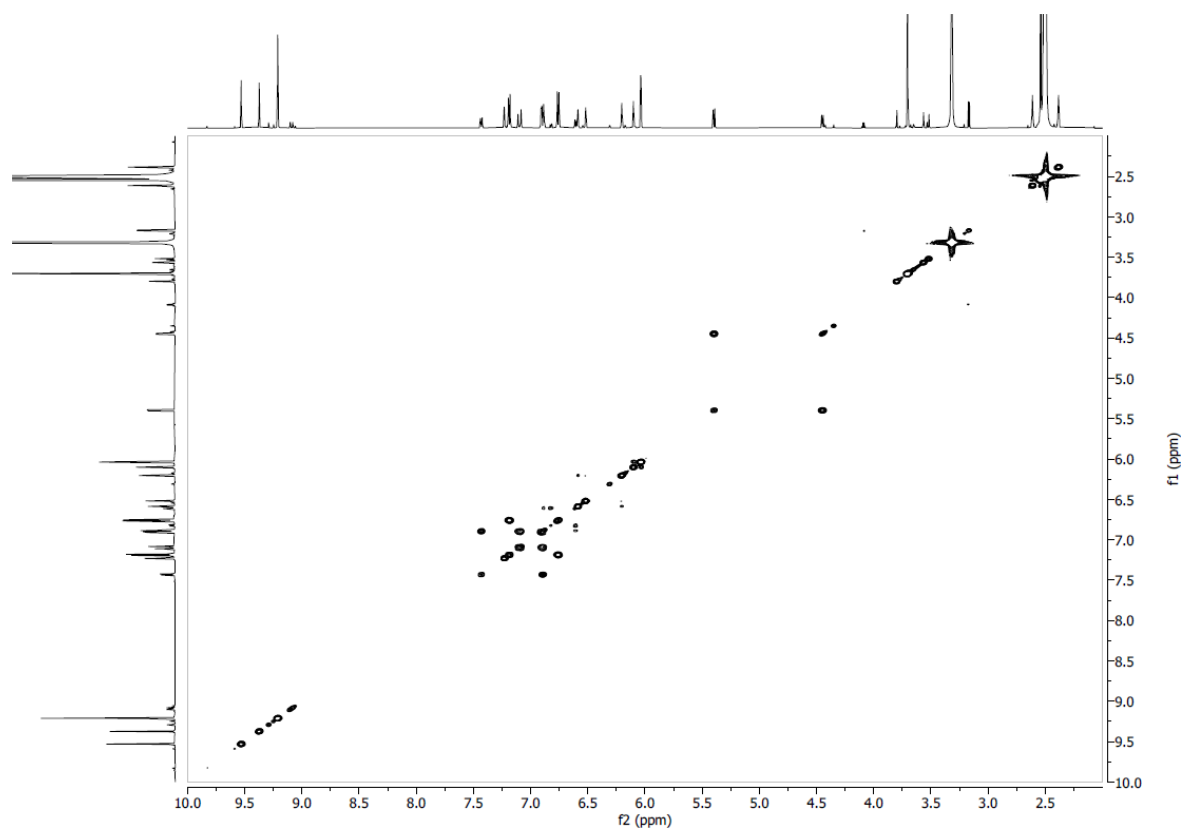

COSY NMR spectrum of compound **10** in DMSO-*d*<sub>6</sub>

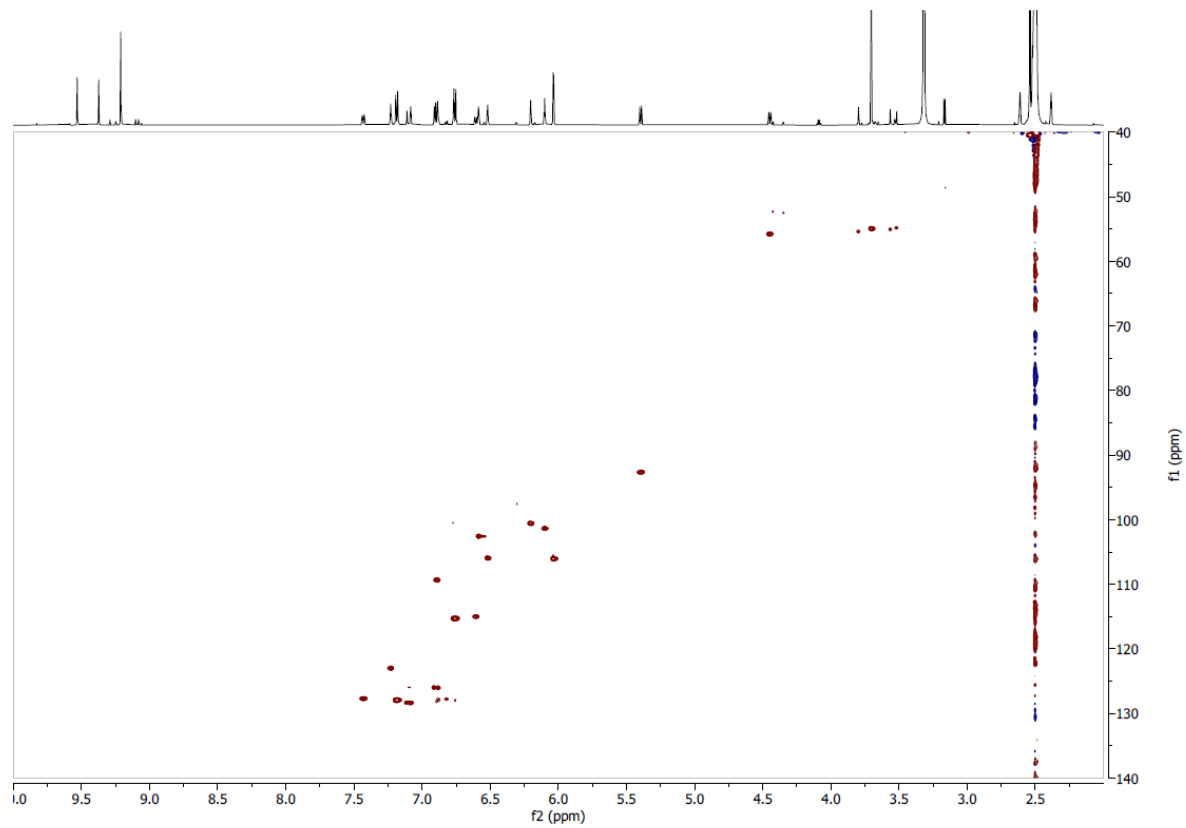

Edited HSQC NMR spectrum of compound **10** in DMSO-*d*<sub>6</sub>

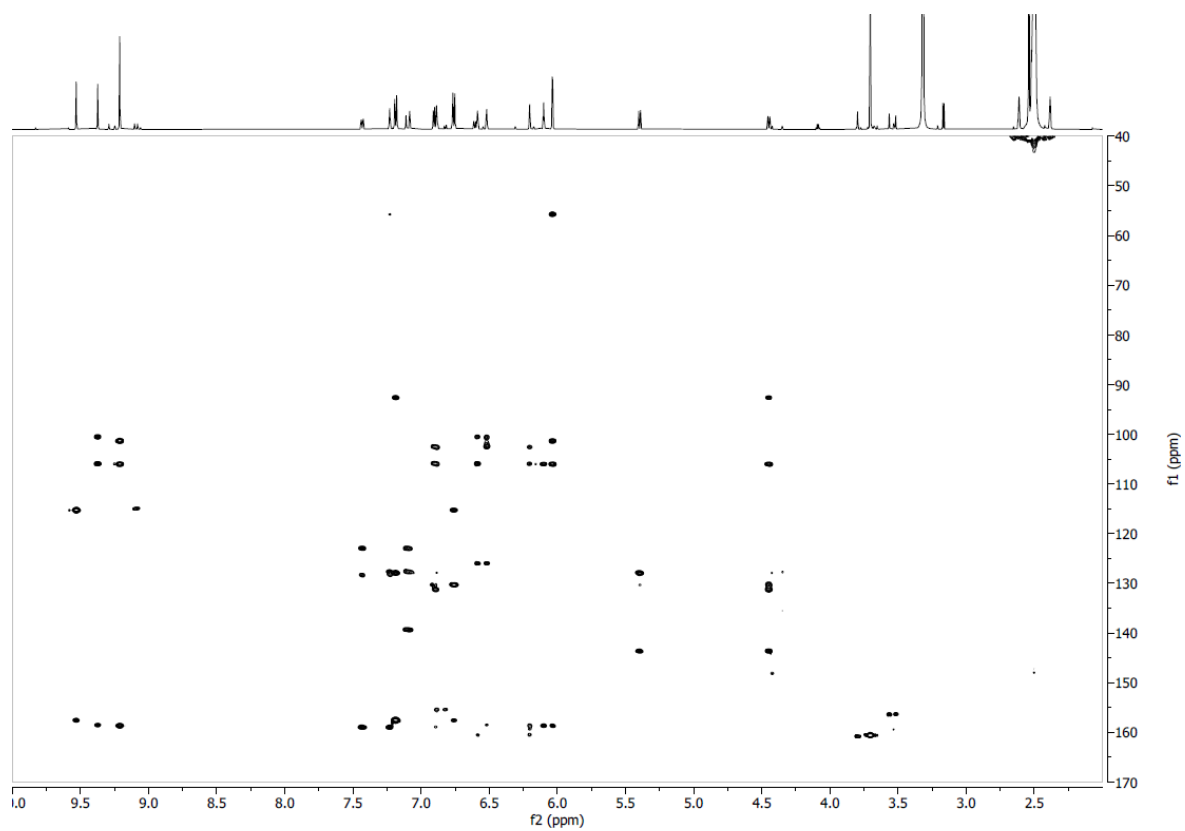

HMBC NMR spectrum of compound **10** in DMSO-*d*<sub>6</sub>

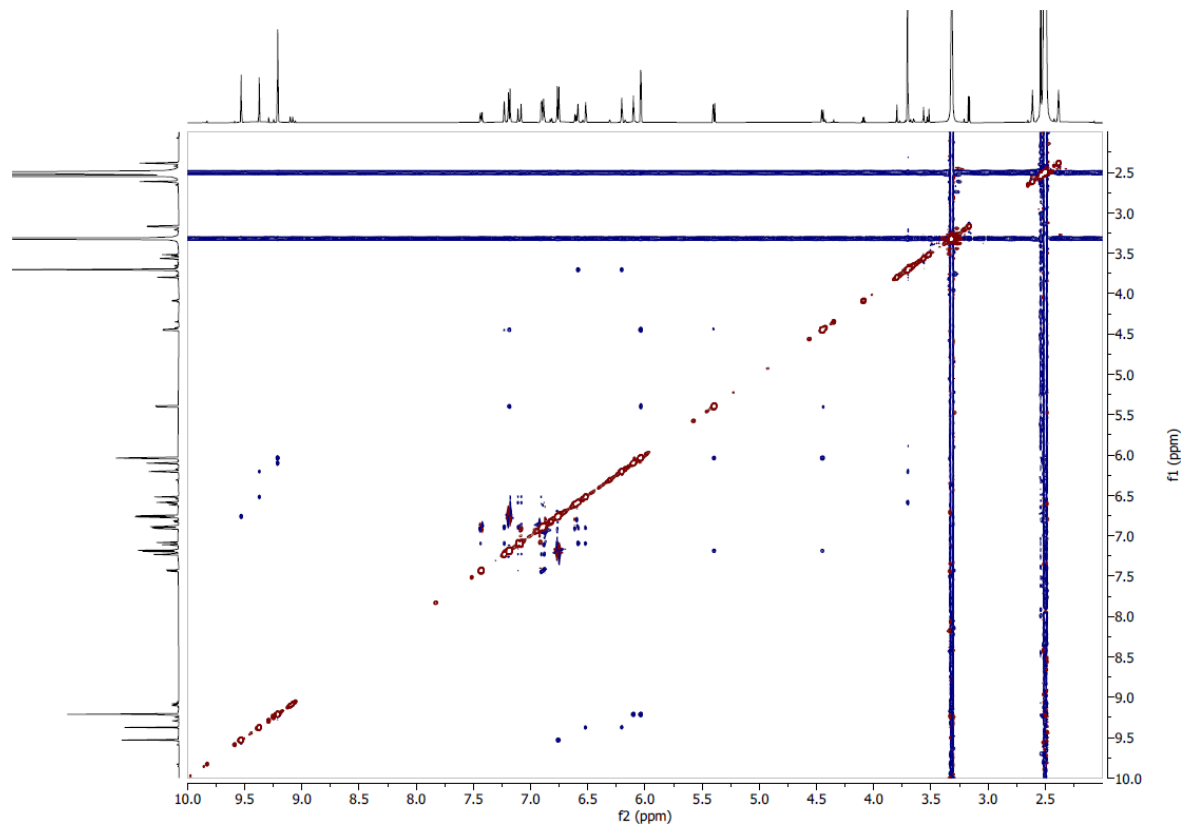

ROESY NMR spectrum of compound **10** in DMSO-*d*<sub>6</sub>

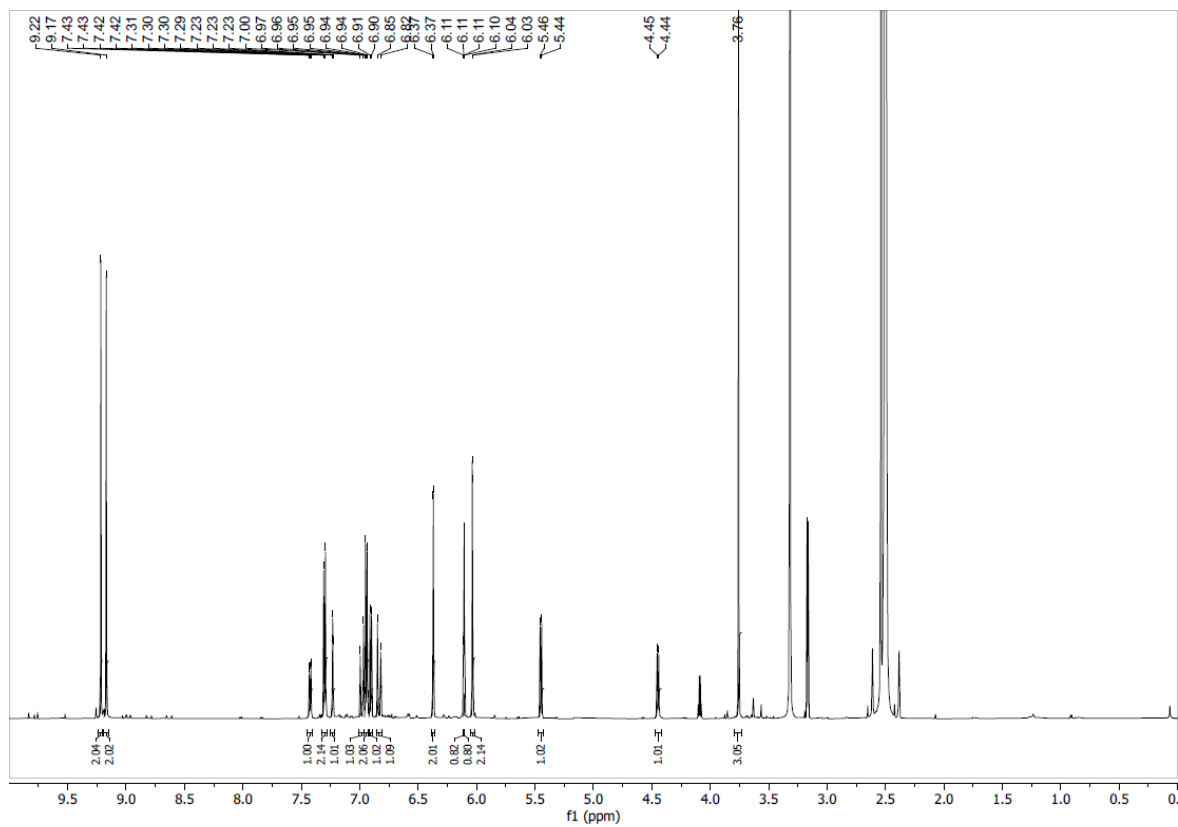

$^1\text{H}$  NMR spectrum of compound **11** in  $\text{DMSO-}d_6$  at 600 MHz

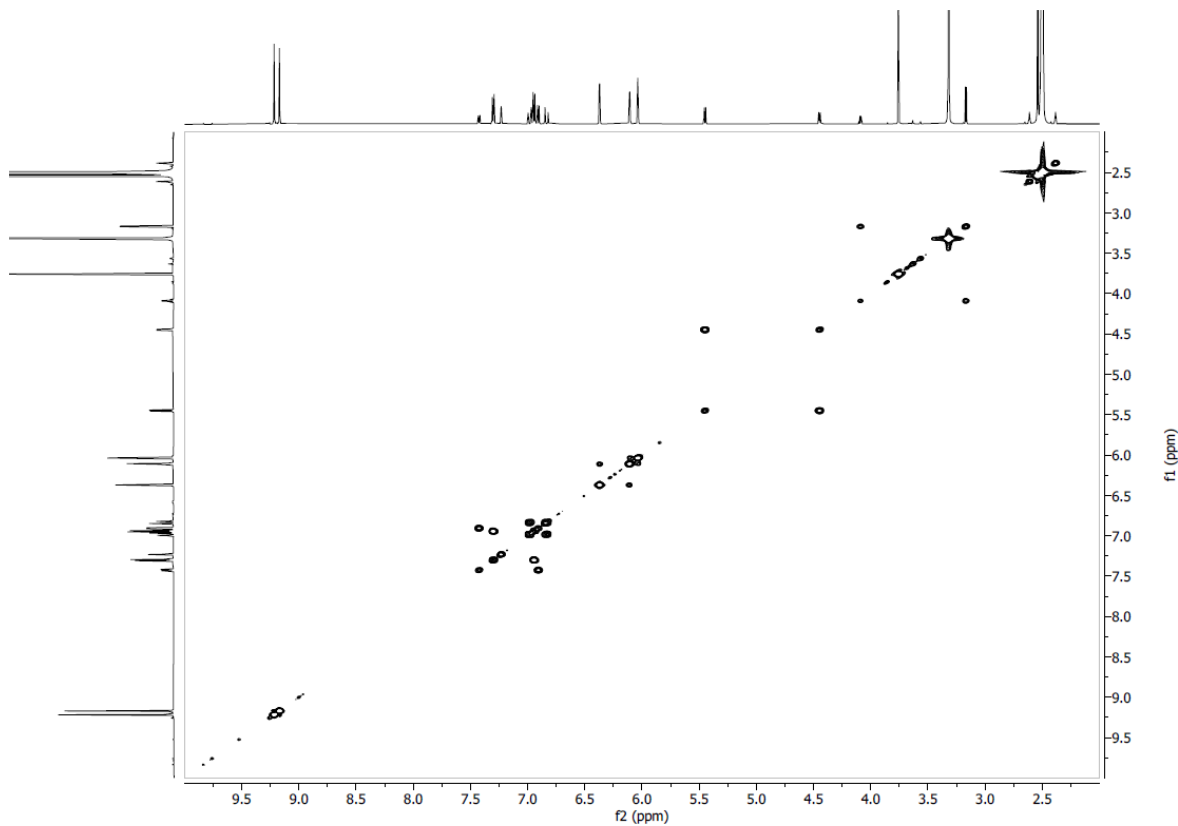

COSY NMR spectrum of compound **11** in  $\text{DMSO-}d_6$

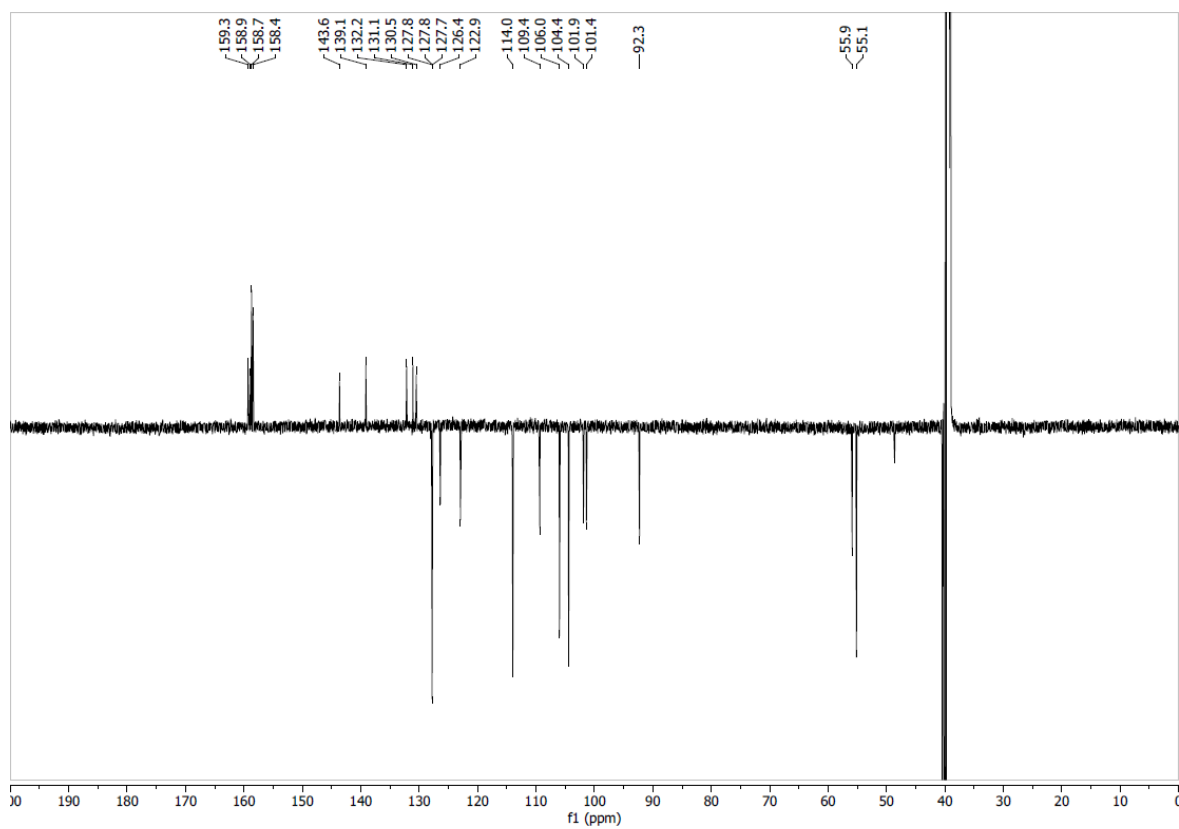

$^{13}\text{C}$ -DEPTQ NMR spectrum of compound **11** in  $\text{DMSO-}d_6$  at 151 MHz

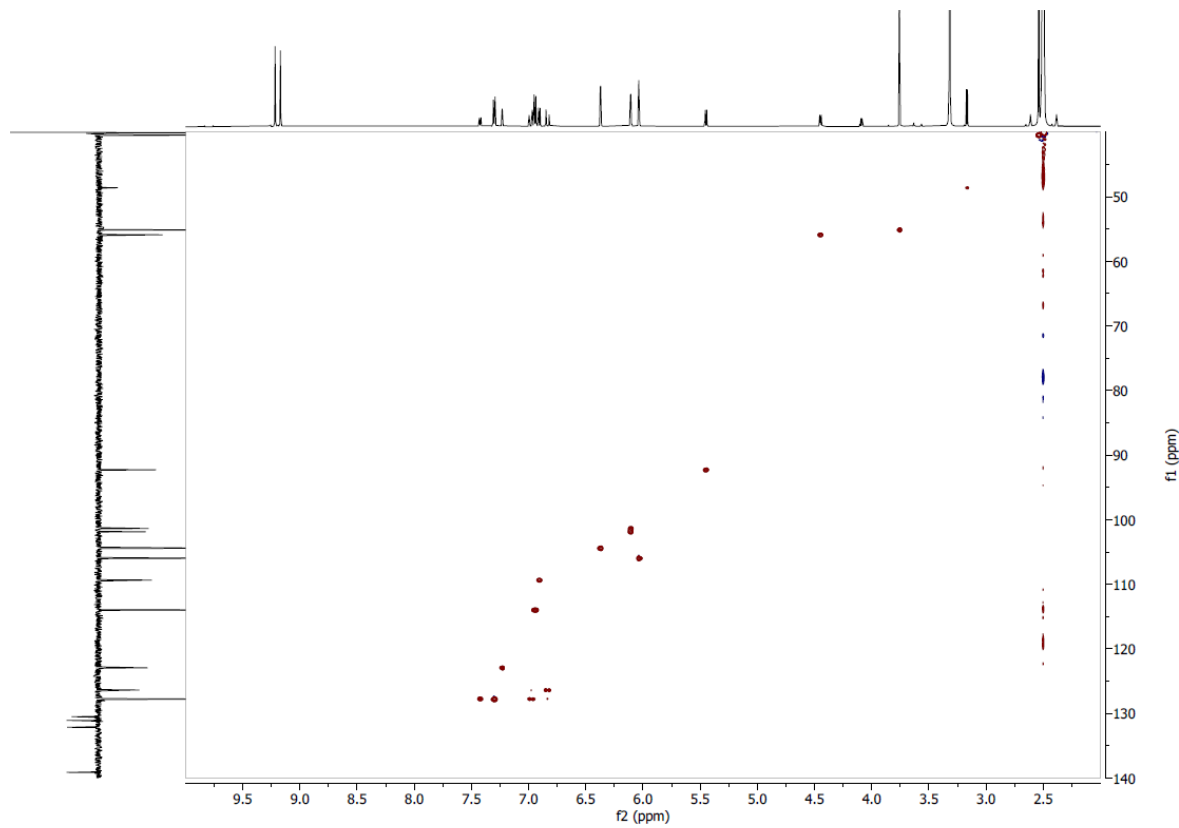

Edited HSQC NMR spectrum of compound **11** in  $\text{DMSO-}d_6$

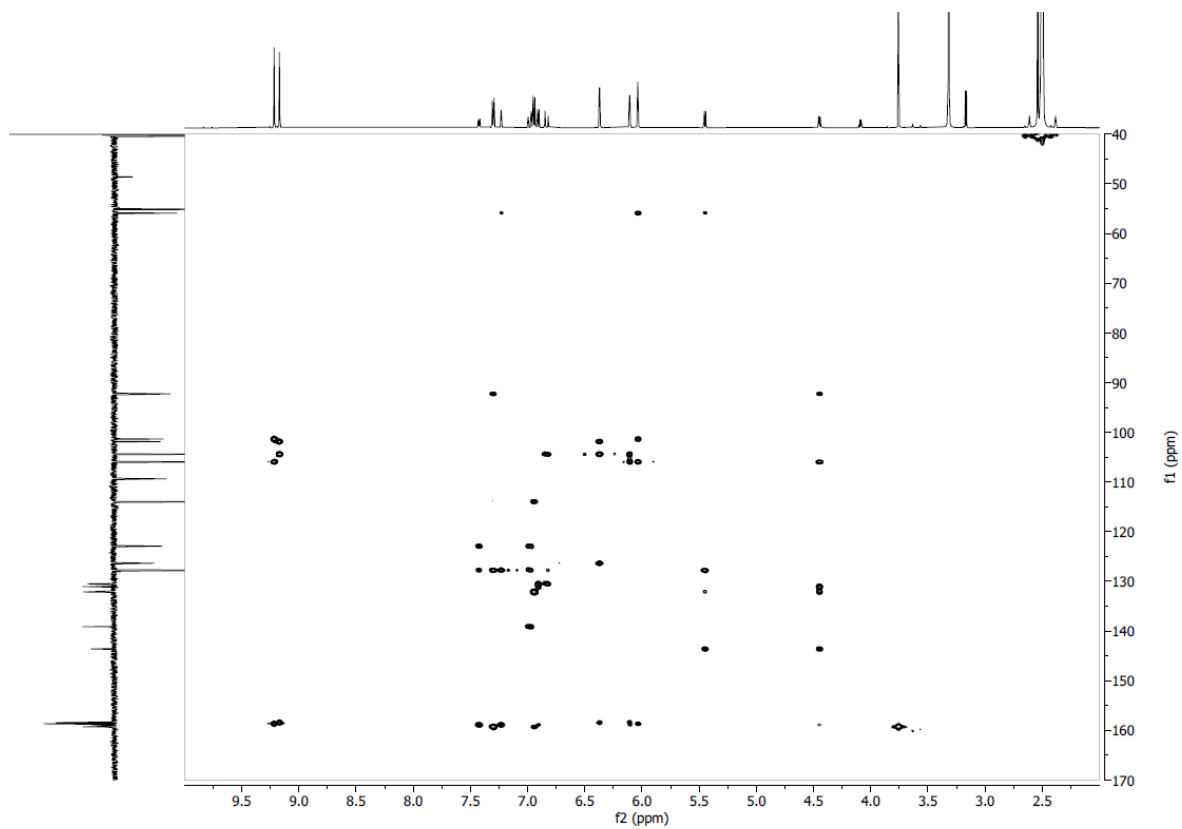

HMBC NMR spectrum of compound **11** in DMSO-*d*<sub>6</sub>

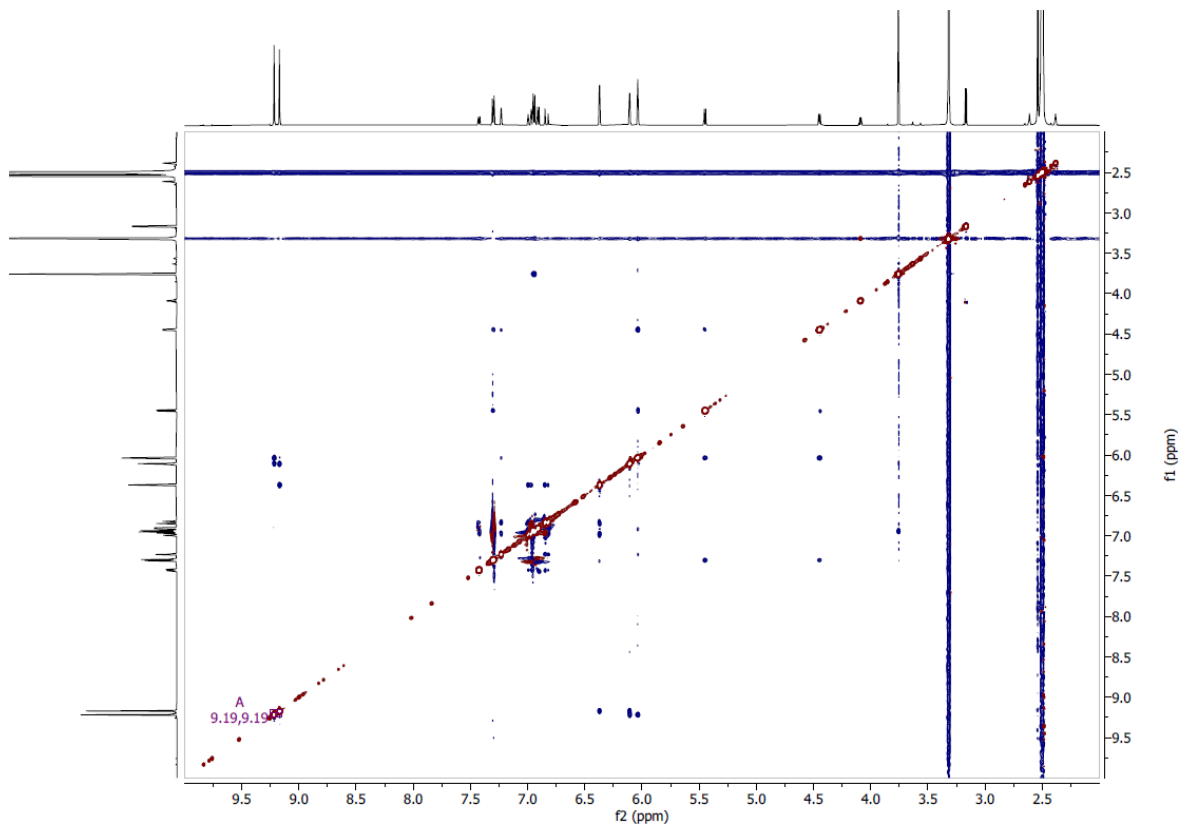

ROESY NMR spectrum of compound **11** in DMSO-*d*<sub>6</sub>



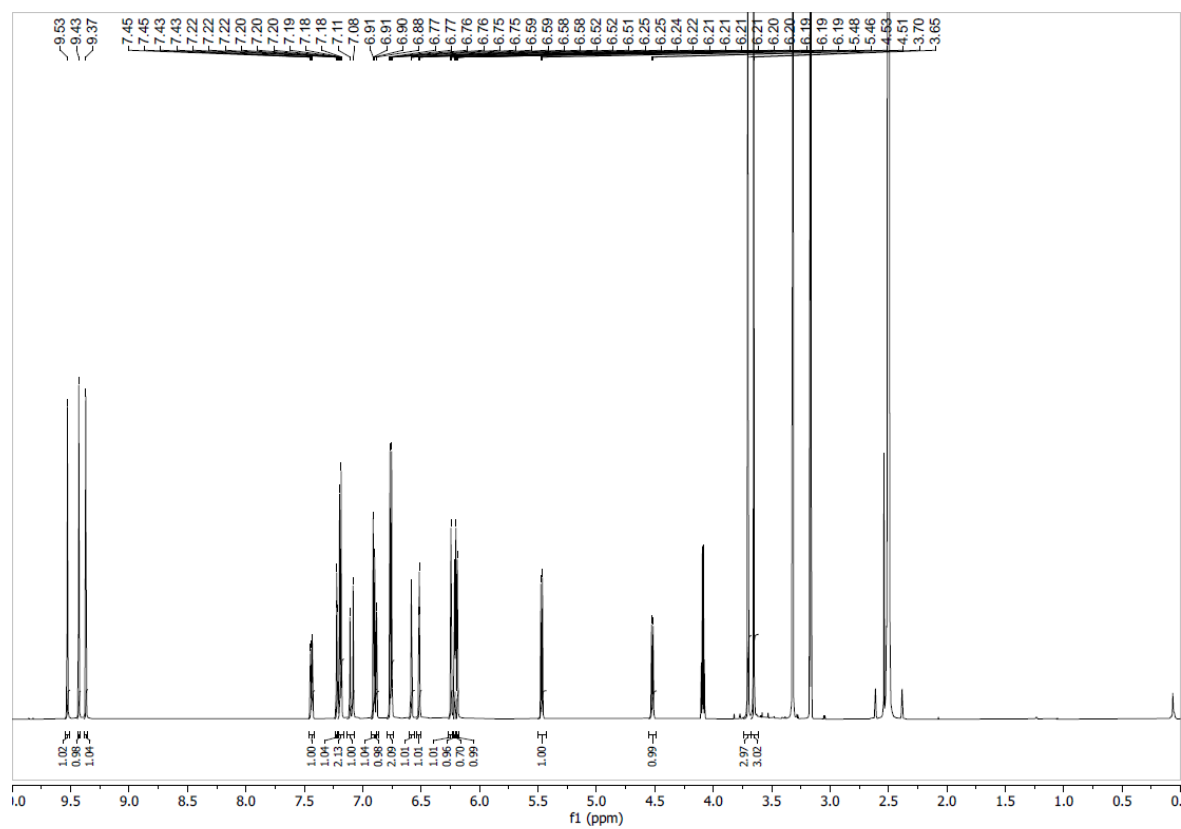

$^1\text{H}$  NMR spectrum of compound **12** in  $\text{DMSO-}d_6$  at 600 MHz

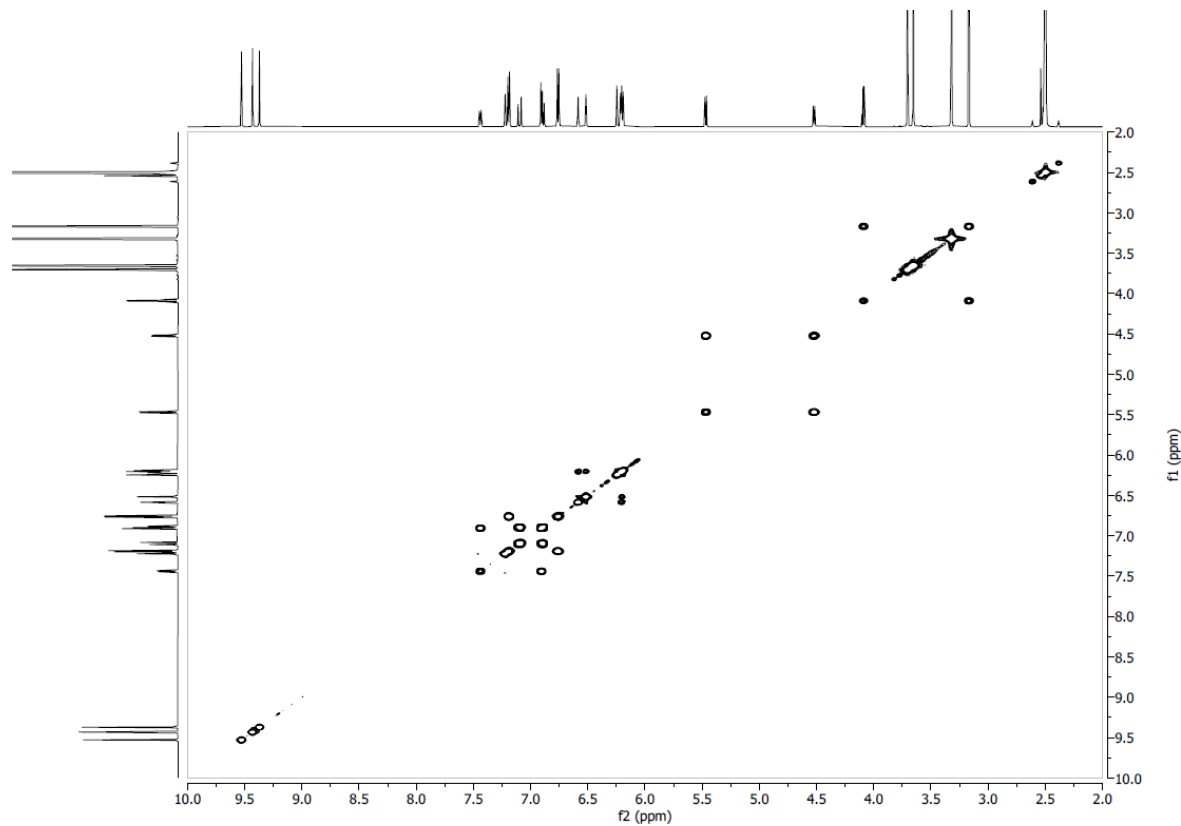

COSY NMR spectrum of compound **12** in  $\text{DMSO-}d_6$

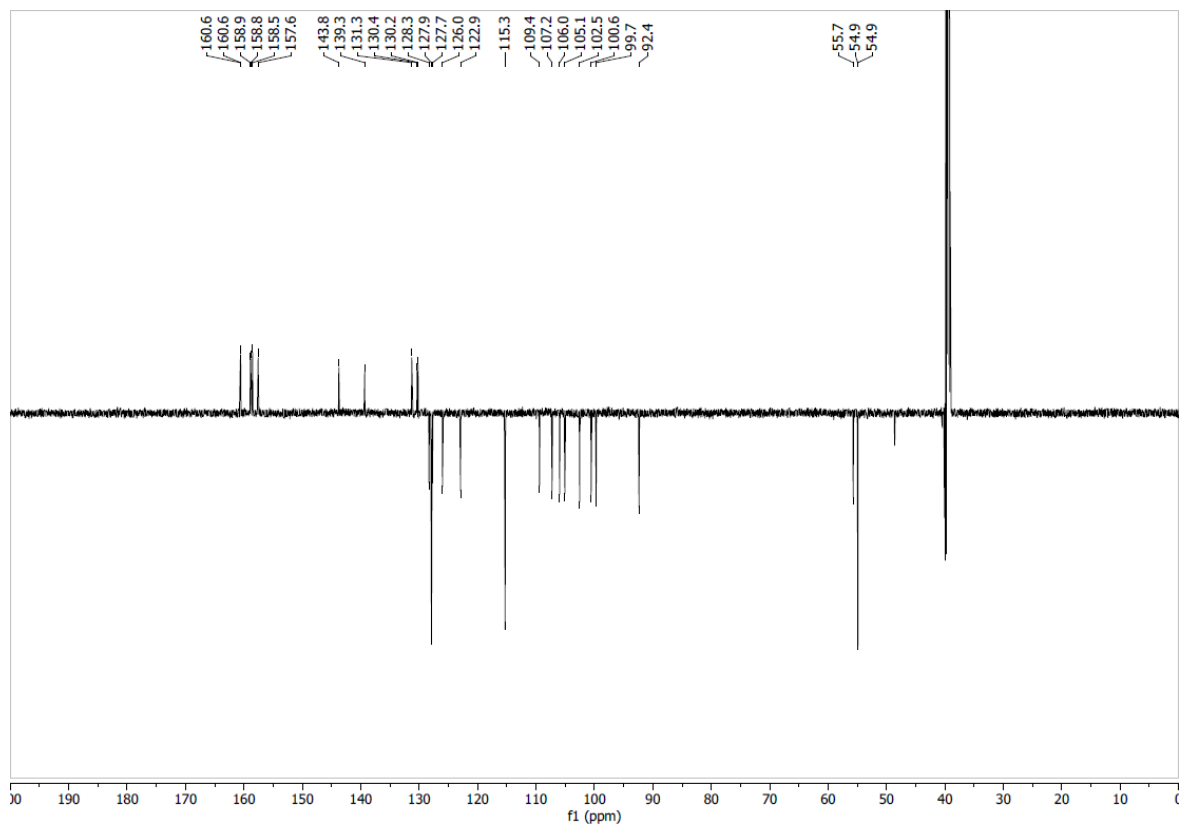

$^{13}\text{C}$ -DEPTQ NMR spectrum of compound **12** in  $\text{DMSO-}d_6$  at 151 MHz

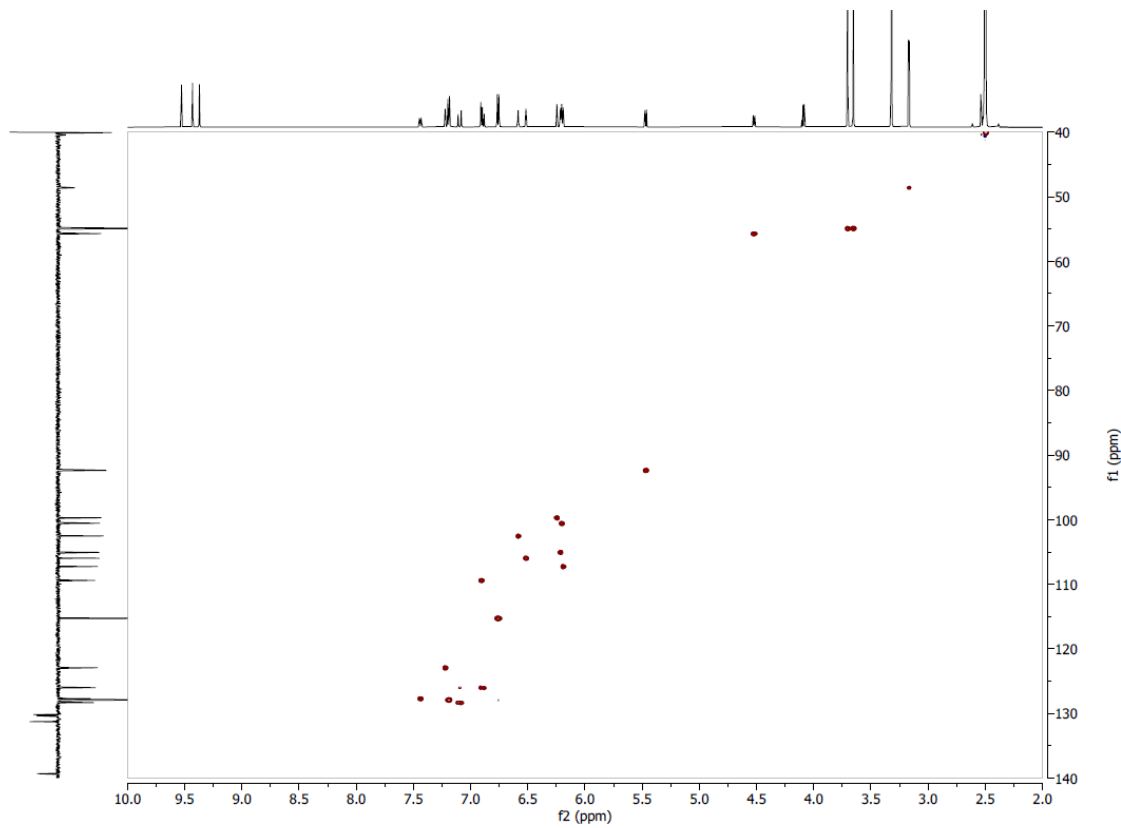

Edited HSQC NMR spectrum of compound **12** in  $\text{DMSO-}d_6$

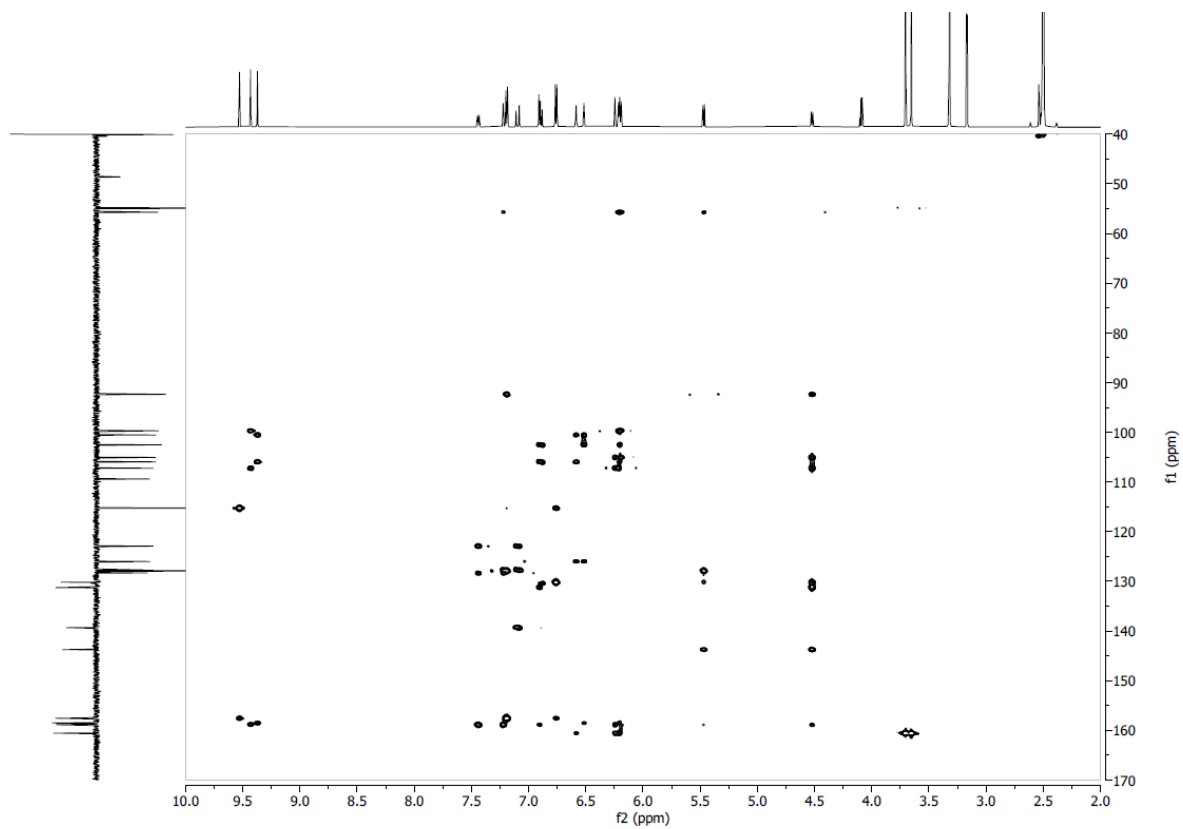

HMBC NMR spectrum of compound **12** in DMSO-*d*<sub>6</sub>

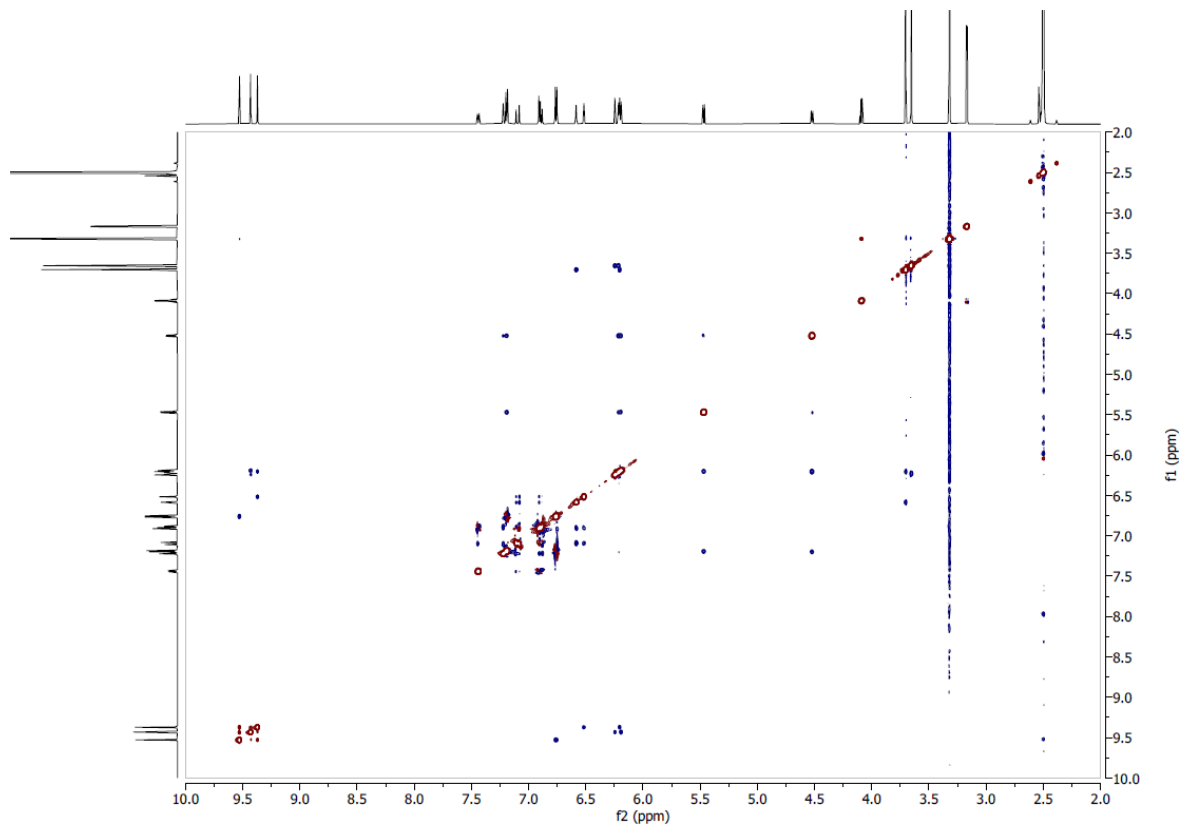

ROESY NMR spectrum of compound **12** in DMSO-*d*<sub>6</sub>

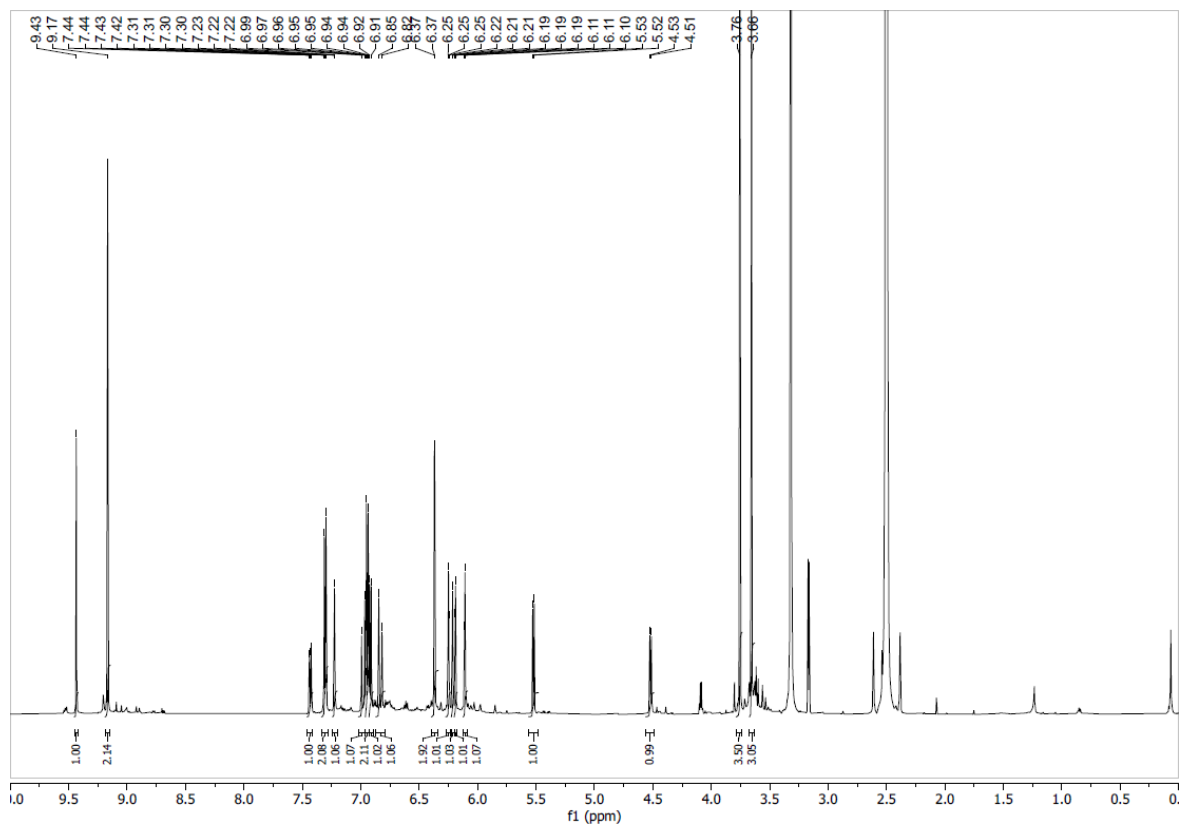

$^1\text{H}$  NMR spectrum of compound **13** in  $\text{DMSO-}d_6$  at 600 MHz

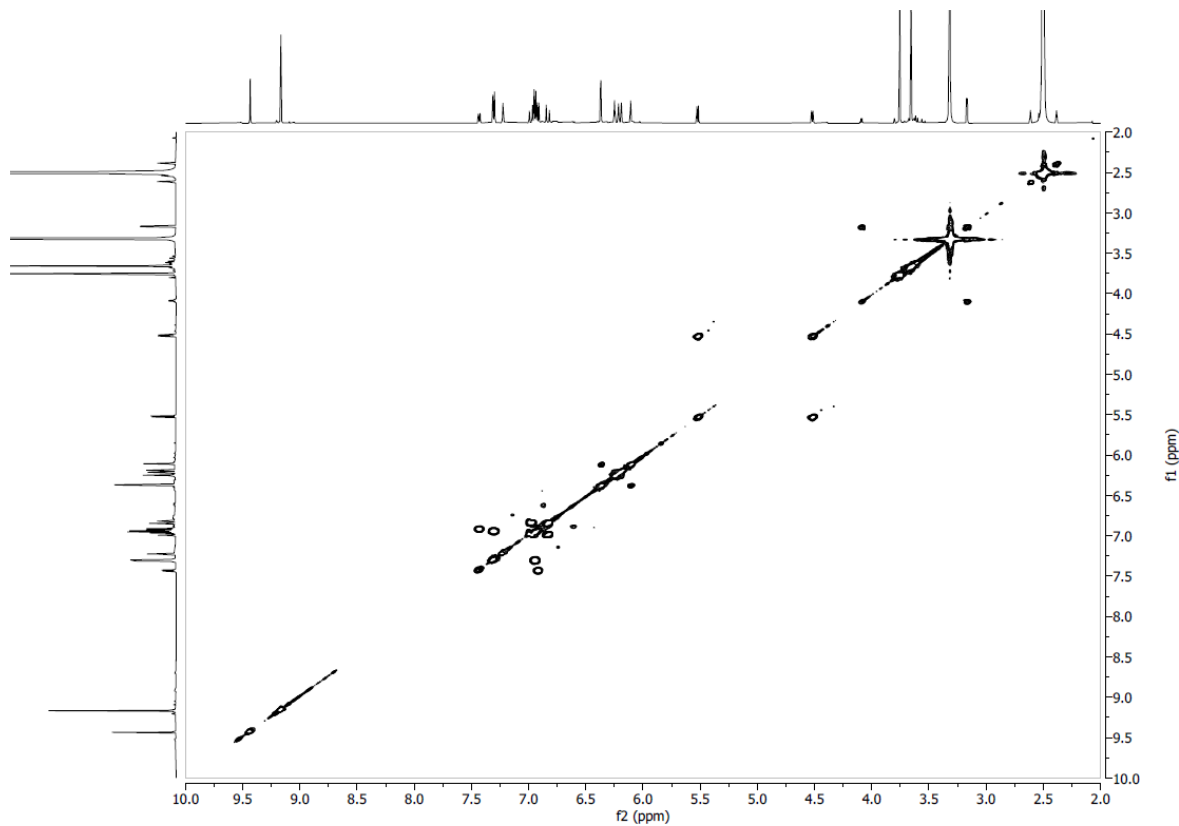

COSY NMR spectrum of compound **13** in  $\text{DMSO-}d_6$

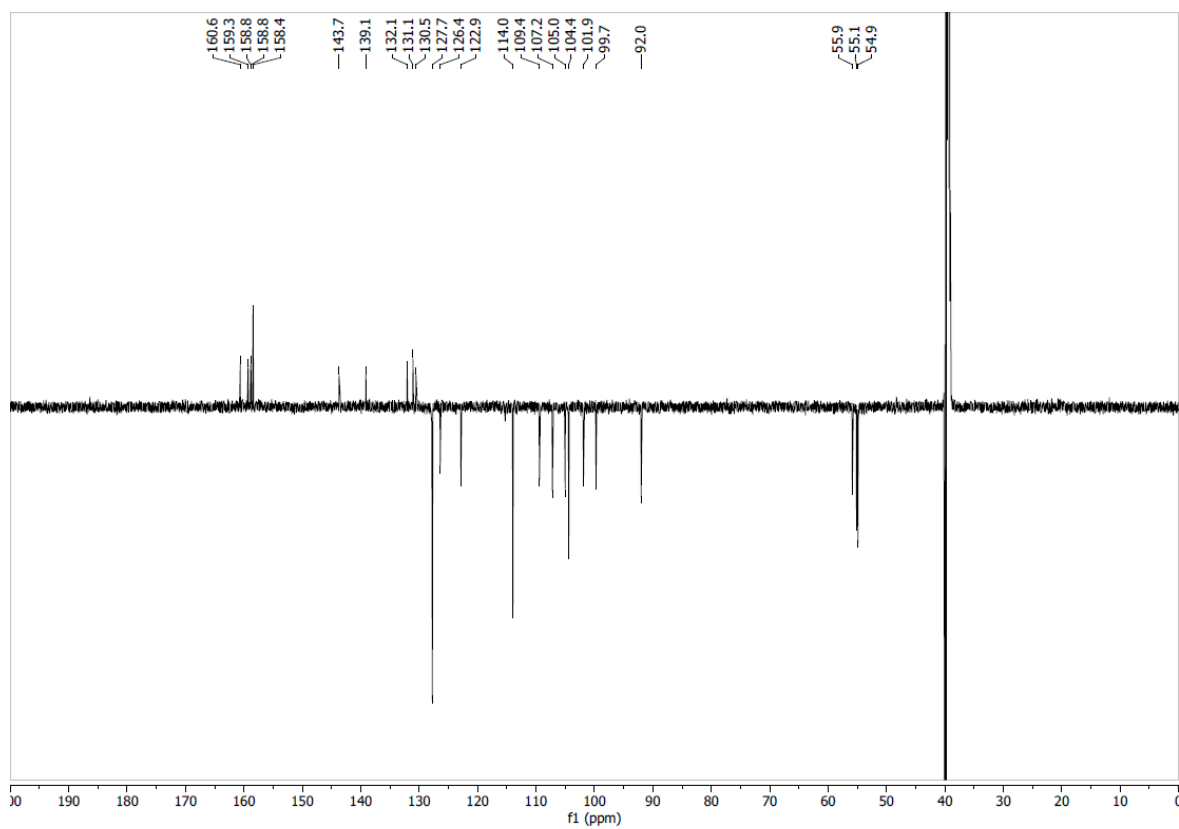

$^{13}\text{C}$ -DEPTQ NMR spectrum of compound **13** in  $\text{DMSO-}d_6$  at 151 MHz

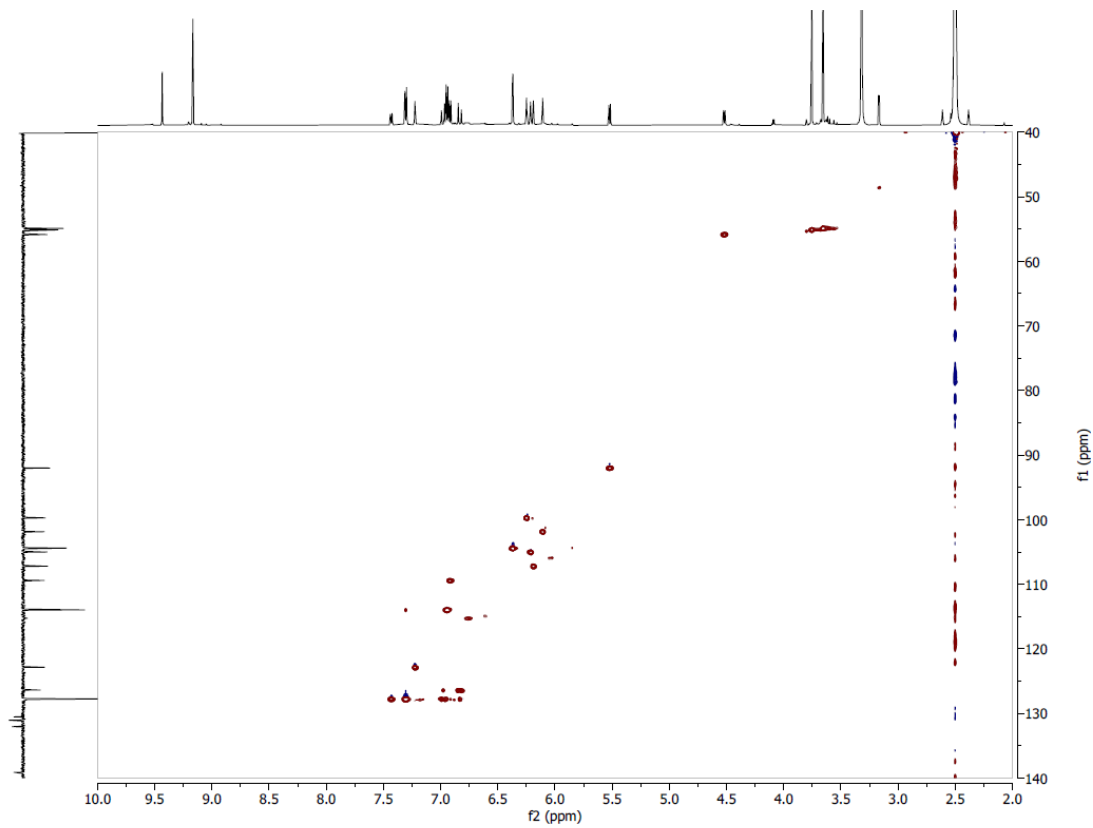

Edited HSQC NMR spectrum of compound **13** in  $\text{DMSO-}d_6$

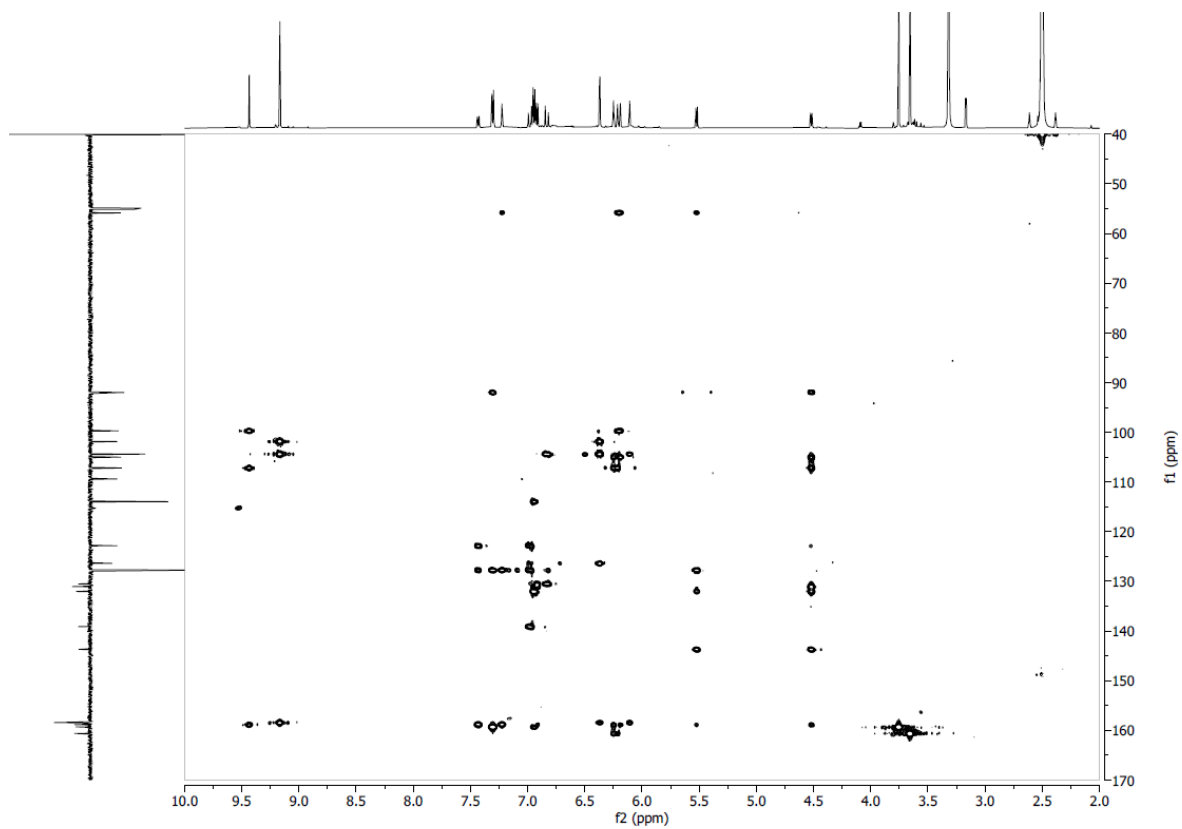

HMBC NMR spectrum of compound **13** in DMSO- $d_6$

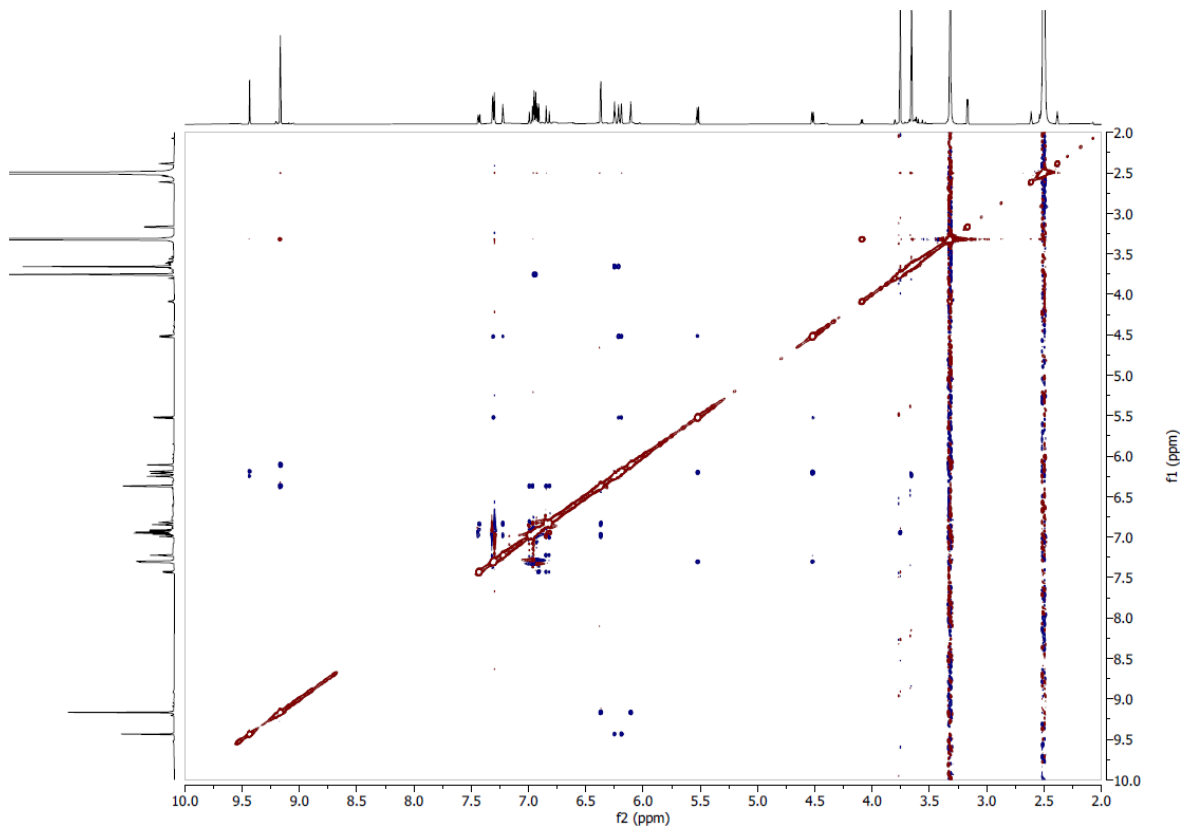

ROESY NMR spectrum of compound **13** in DMSO- $d_6$

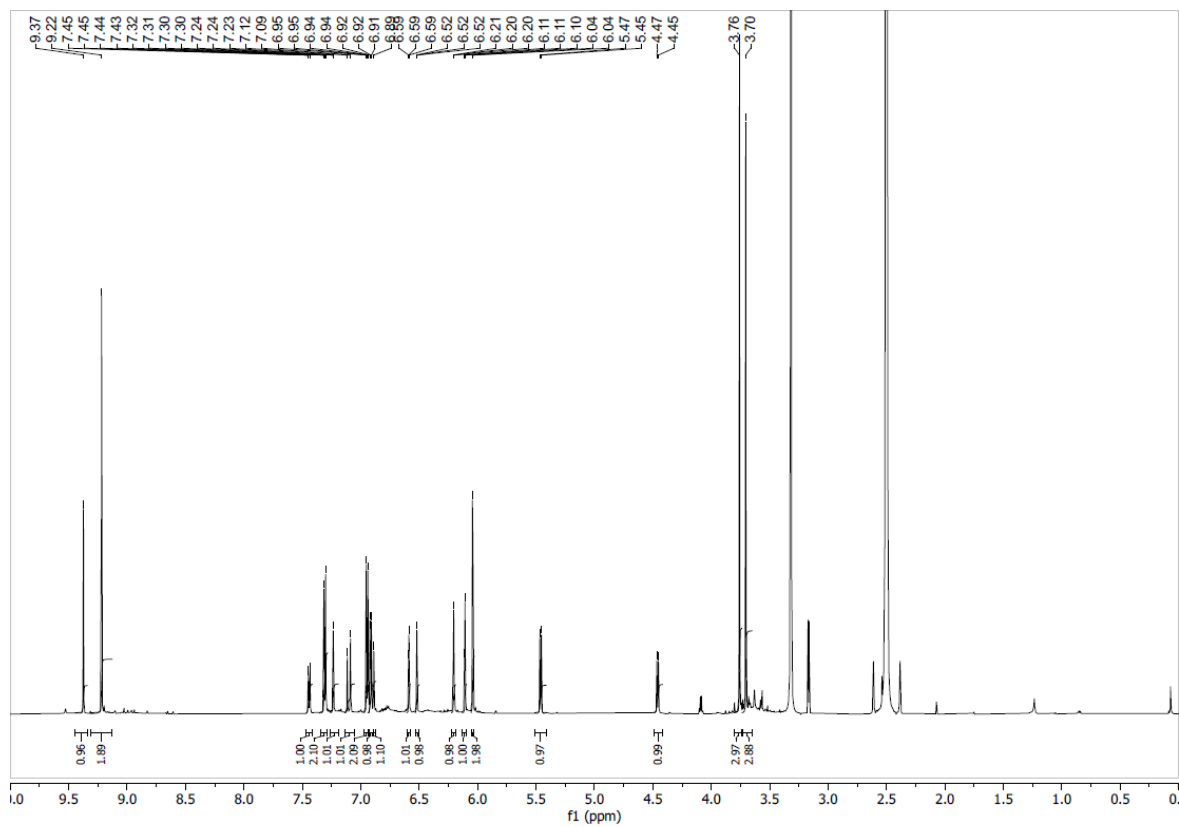

$^1\text{H}$  NMR spectrum of compound **14** in  $\text{DMSO-}d_6$  at 600 MHz

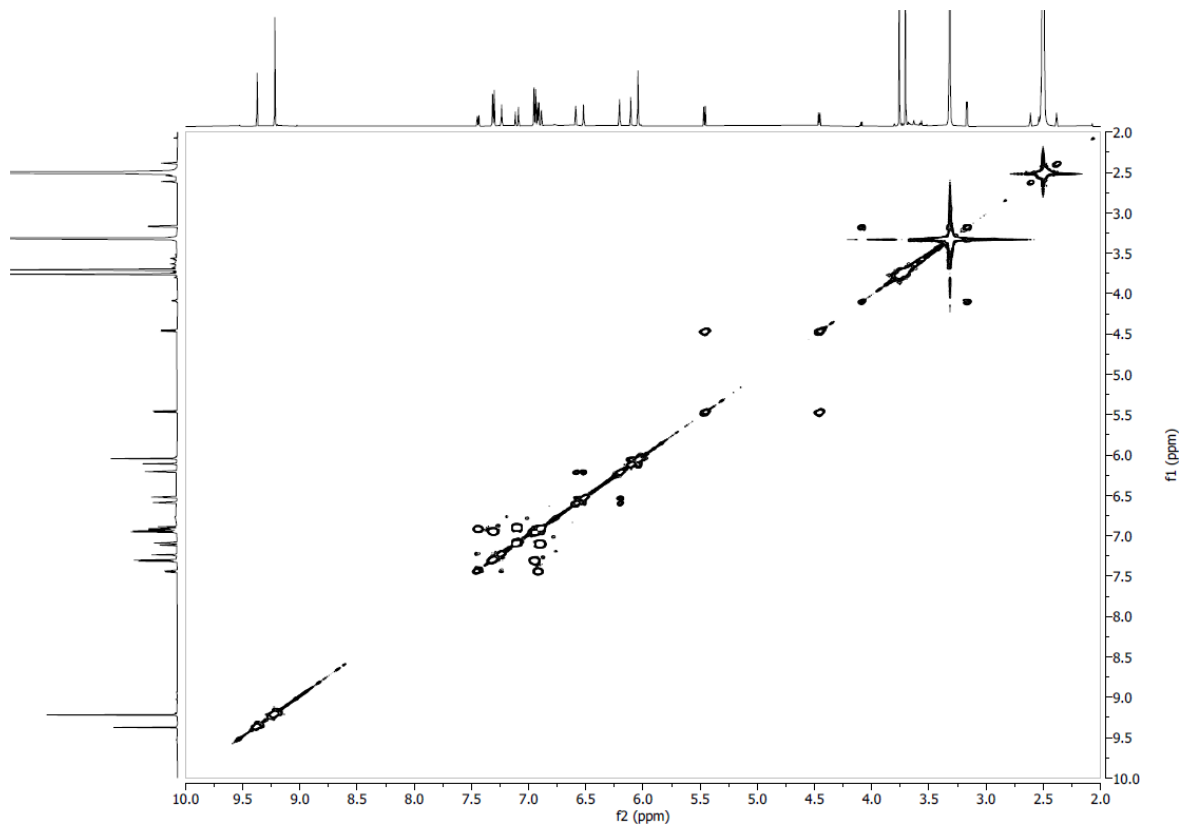

COSY NMR spectrum of compound **14** in  $\text{DMSO-}d_6$

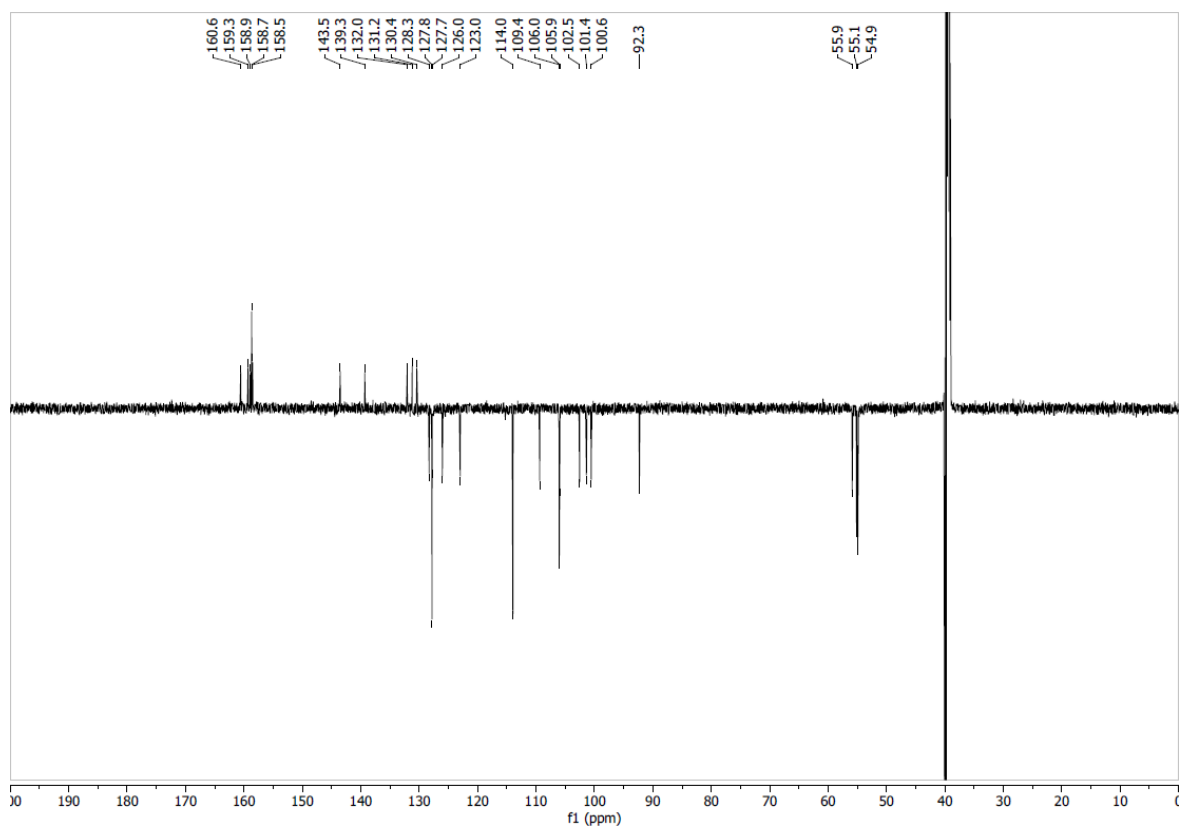

$^{13}\text{C}$ -DEPTQ NMR spectrum of compound **14** in  $\text{DMSO-}d_6$  at 151 MHz

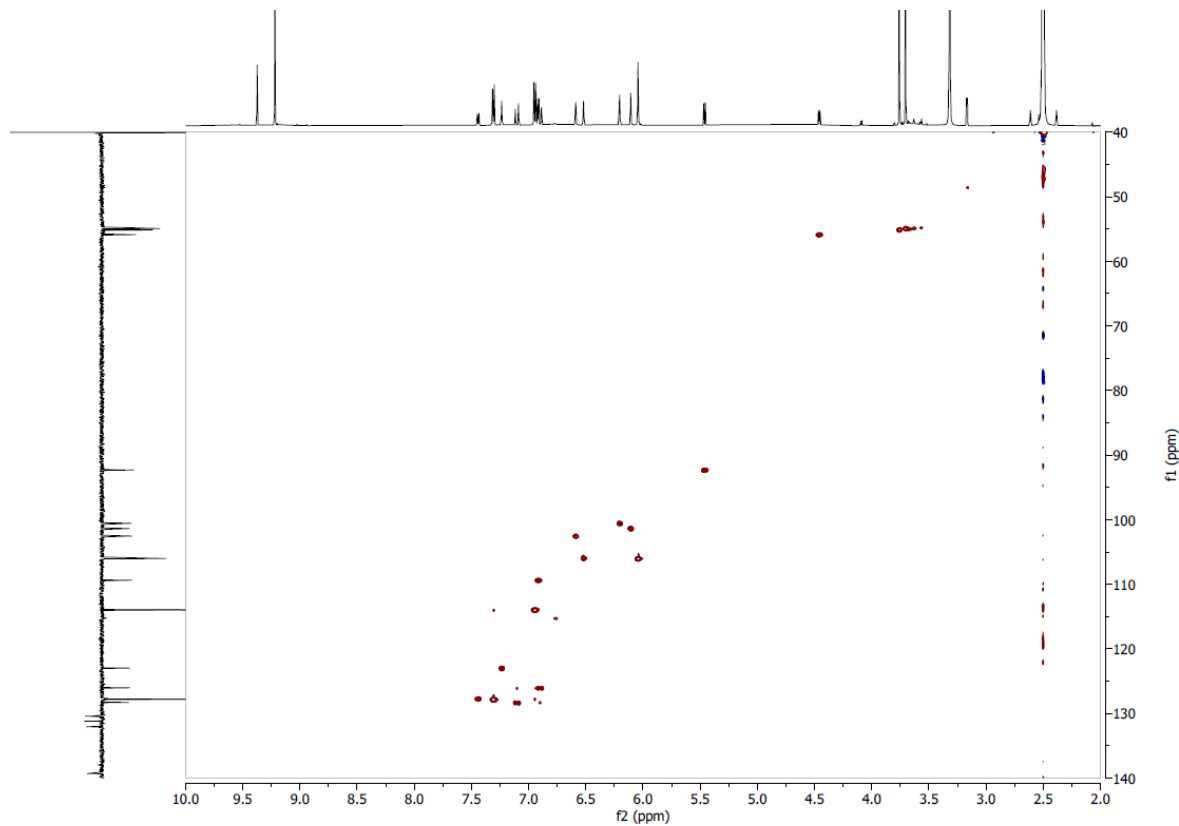

Edited HSQC NMR spectrum of compound **14** in  $\text{DMSO-}d_6$



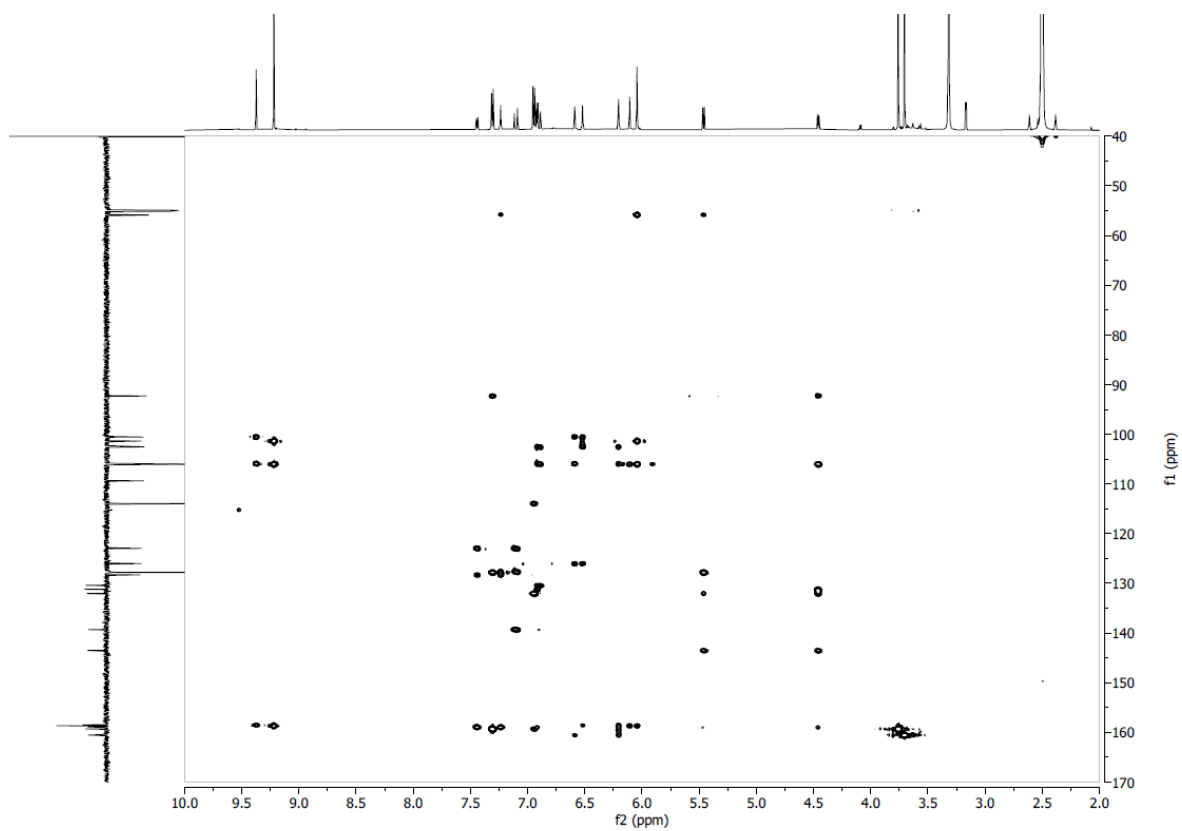

HMBC NMR spectrum of compound **14** in DMSO- $d_6$

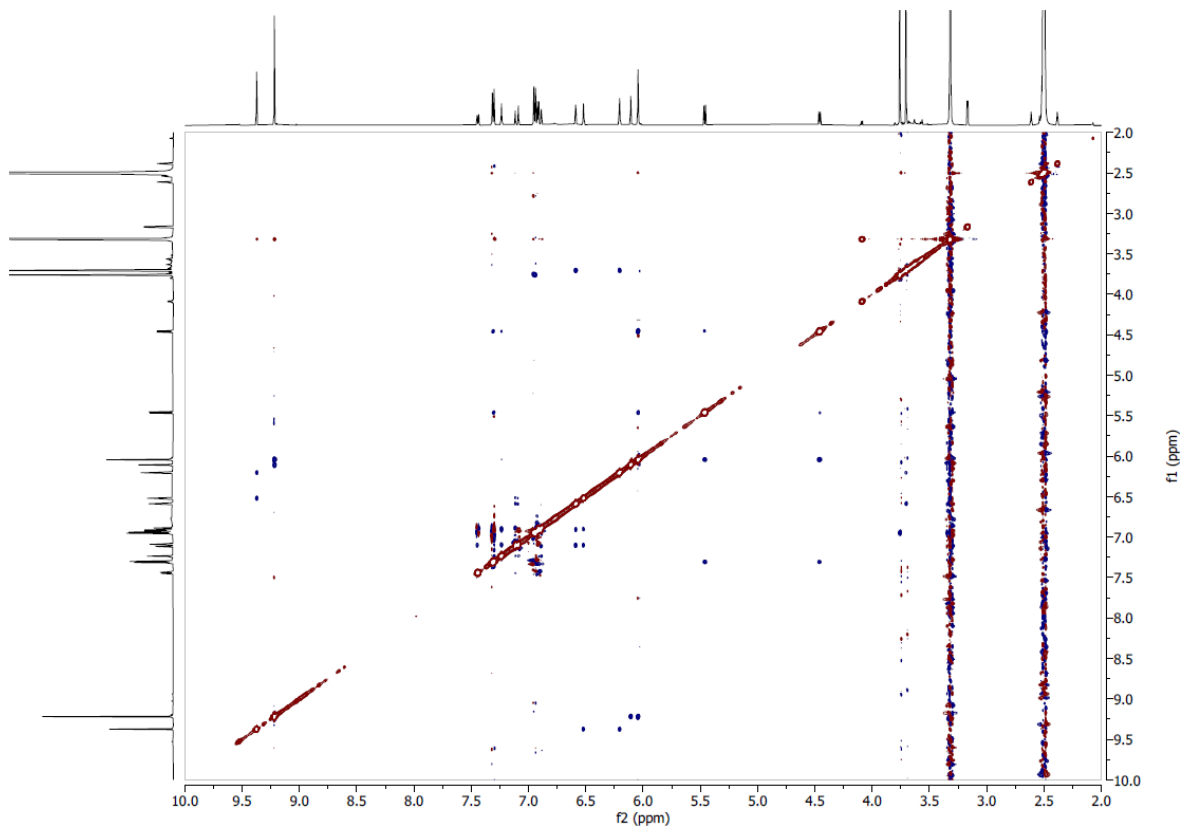

ROESY NMR spectrum of compound **14** in DMSO- $d_6$

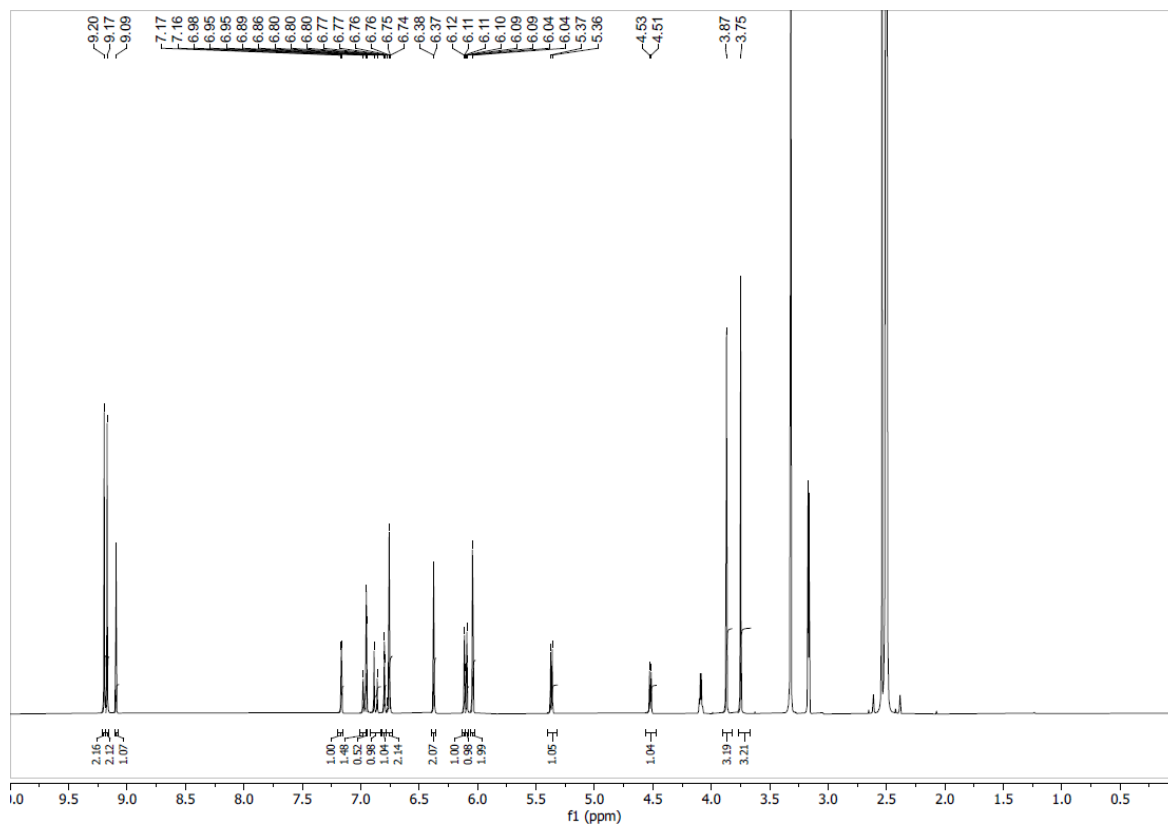

$^1\text{H}$  NMR spectrum of compound **15** in  $\text{DMSO-}d_6$  at 600 MHz

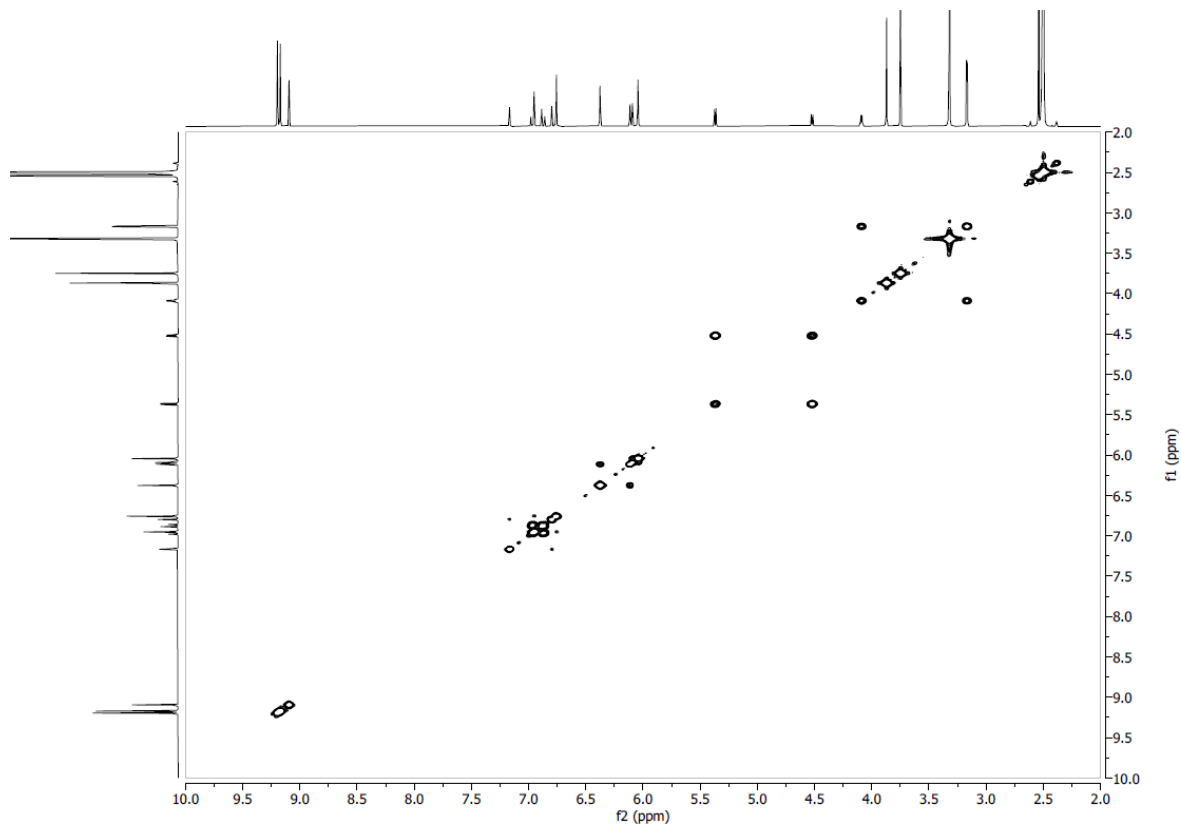

COSY NMR spectrum of compound **15** in  $\text{DMSO-}d_6$

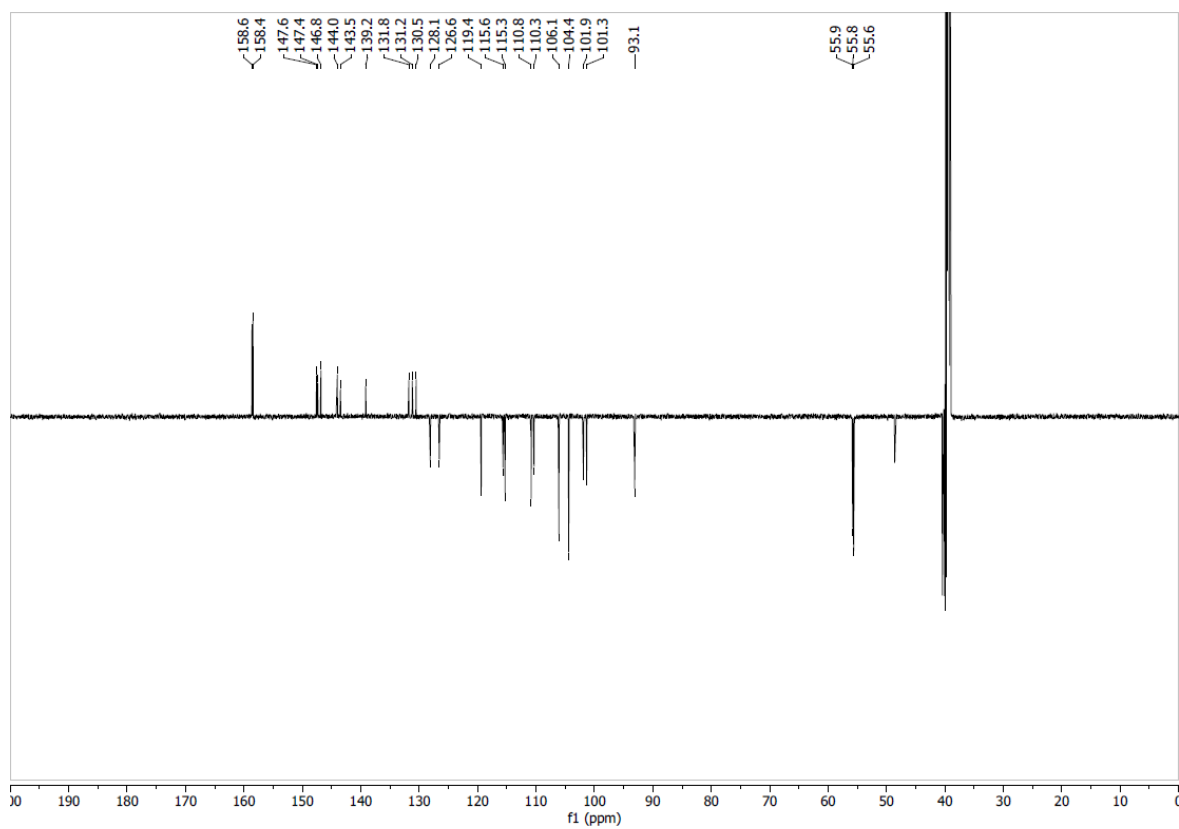

$^{13}\text{C}$ -DEPTQ NMR spectrum of compound **15** in  $\text{DMSO-}d_6$  at 151 MHz

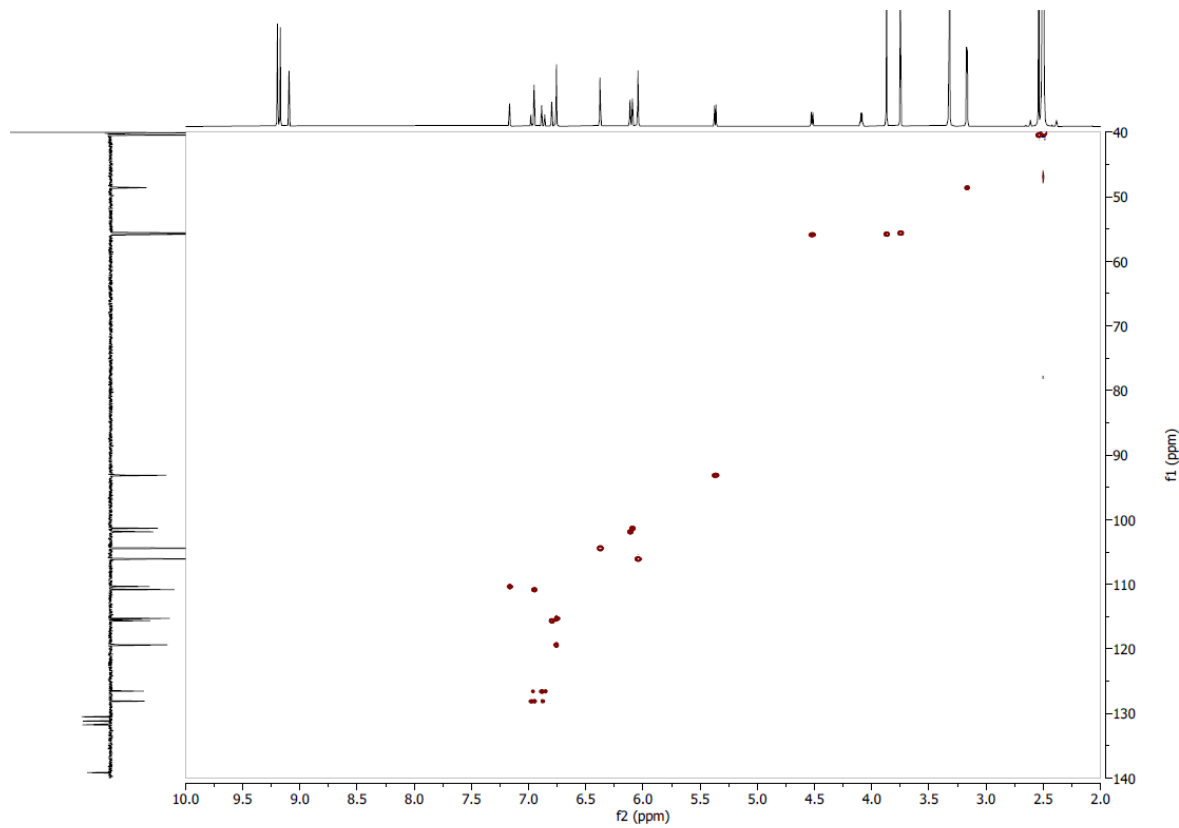

Edited HSQC NMR spectrum of compound **15** in  $\text{DMSO-}d_6$

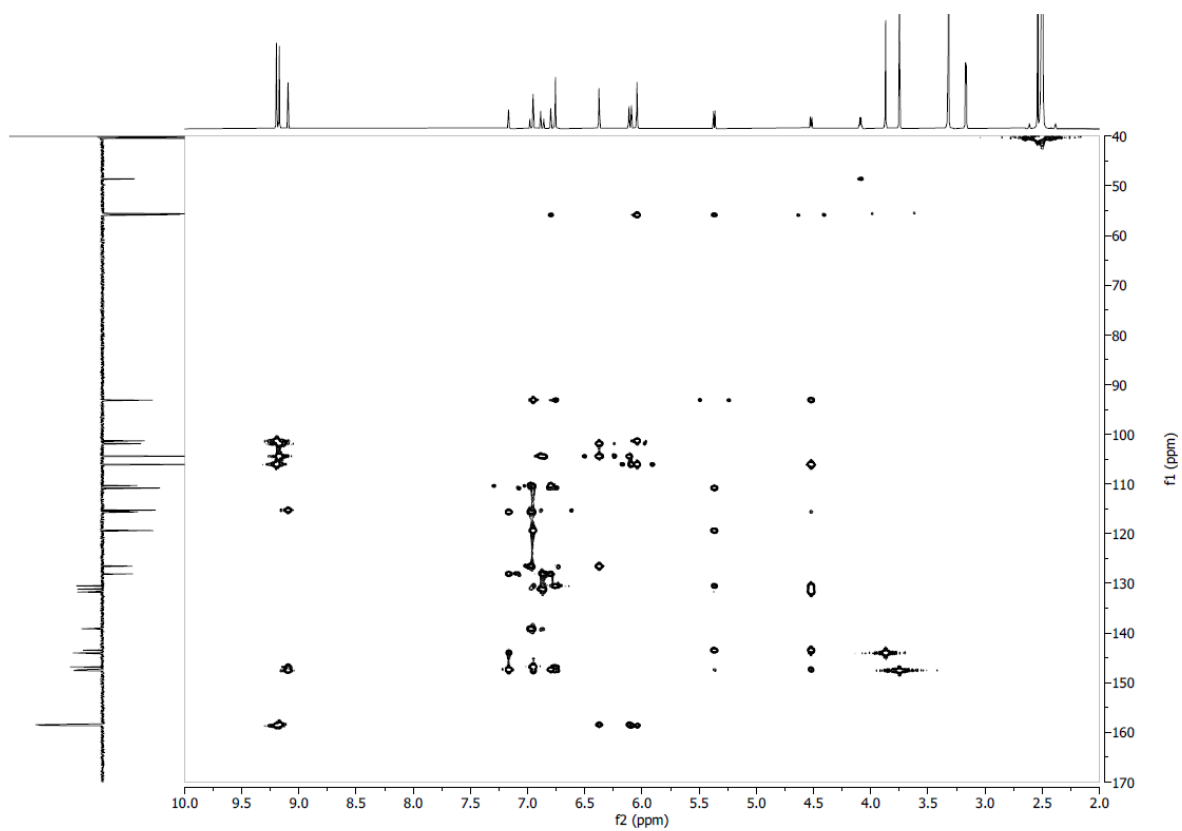

HMBC NMR spectrum of compound **15** in DMSO- $d_6$

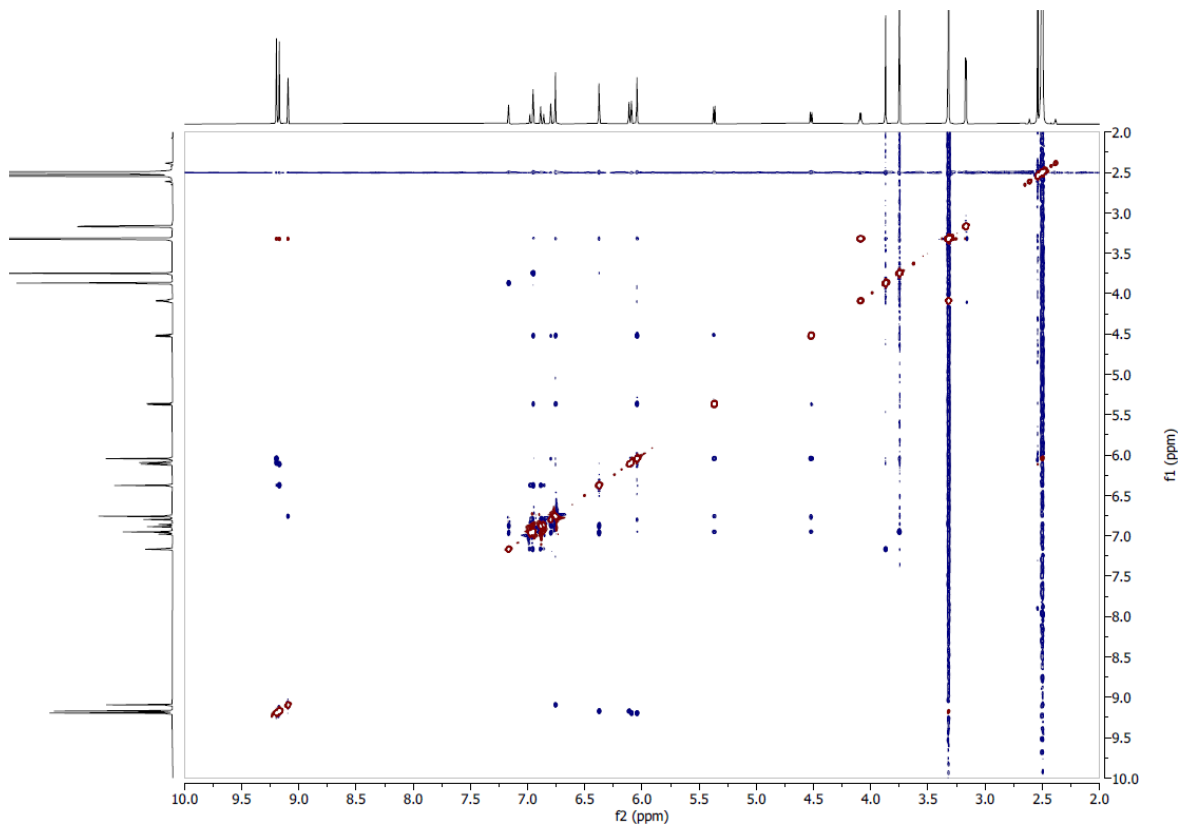

ROESY NMR spectrum of compound **15** in DMSO- $d_6$

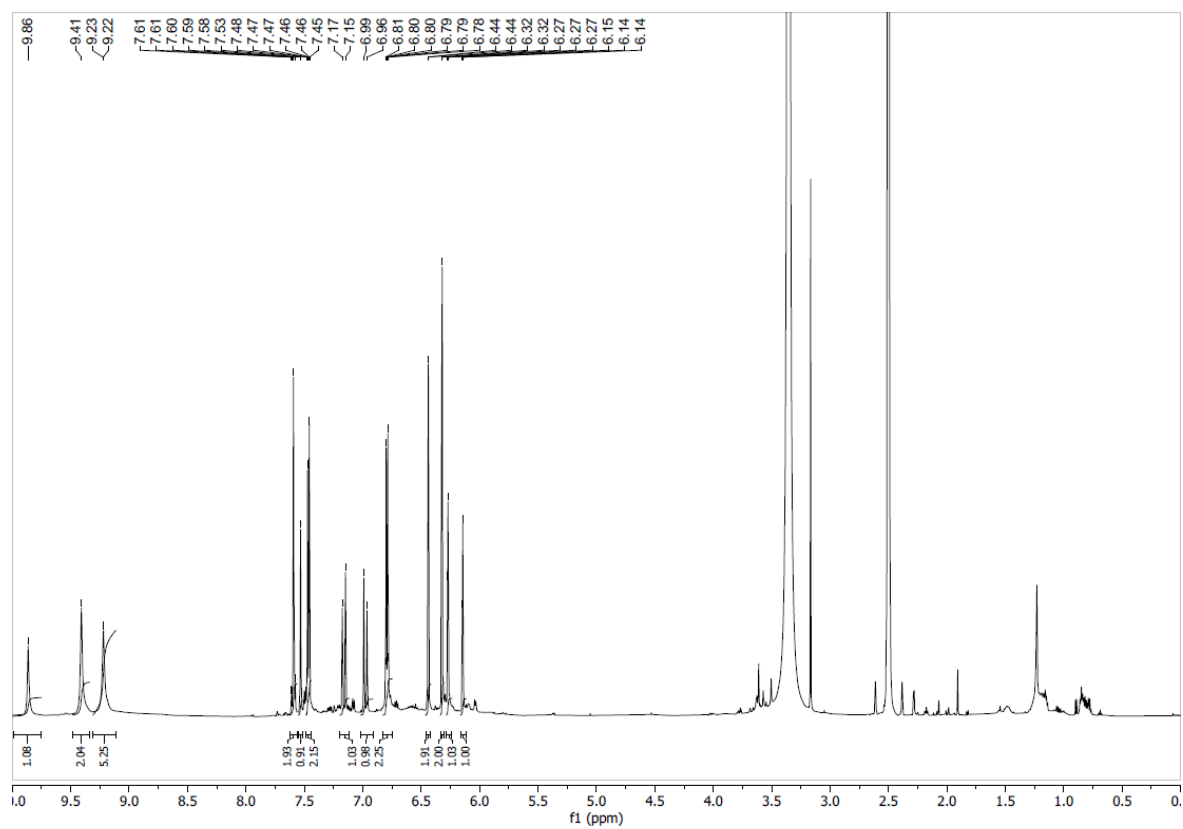

$^1\text{H}$  NMR spectrum of compound **16** in  $\text{DMSO-}d_6$  at 600 MHz

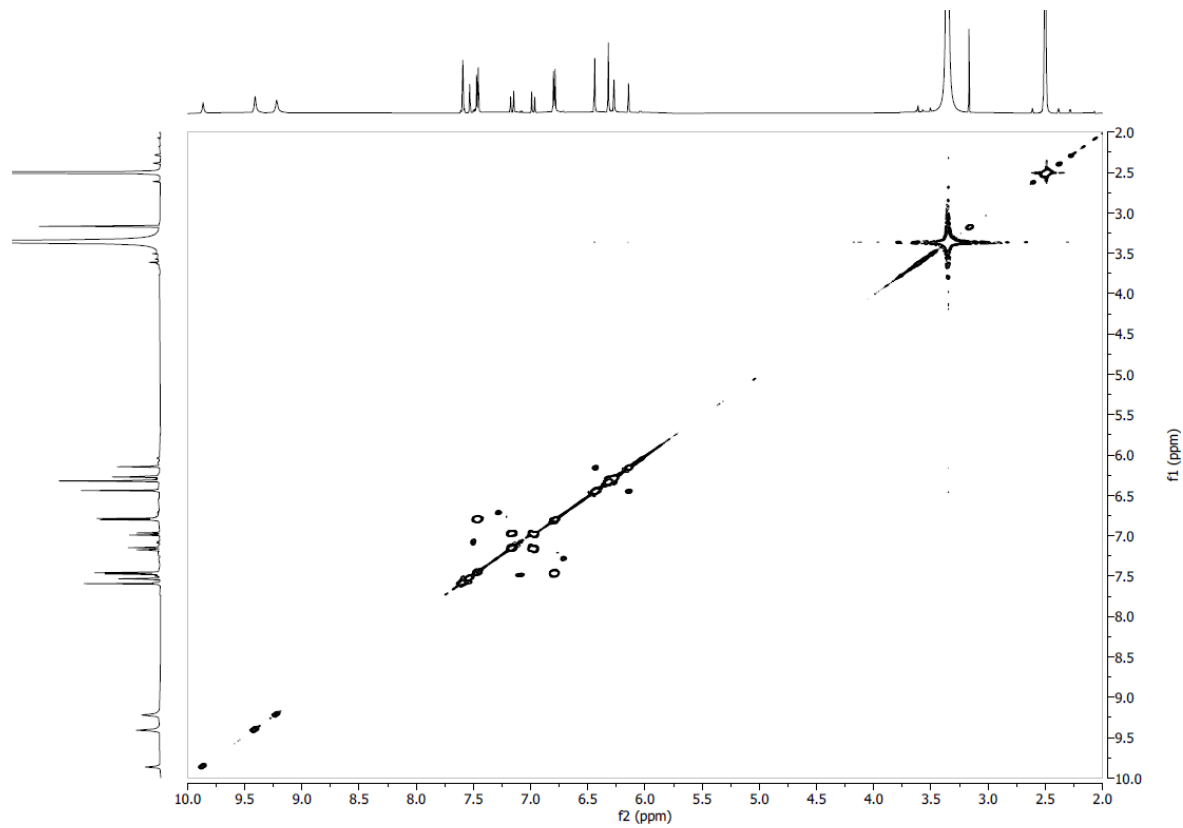

COSY NMR spectrum of compound **16** in  $\text{DMSO-}d_6$

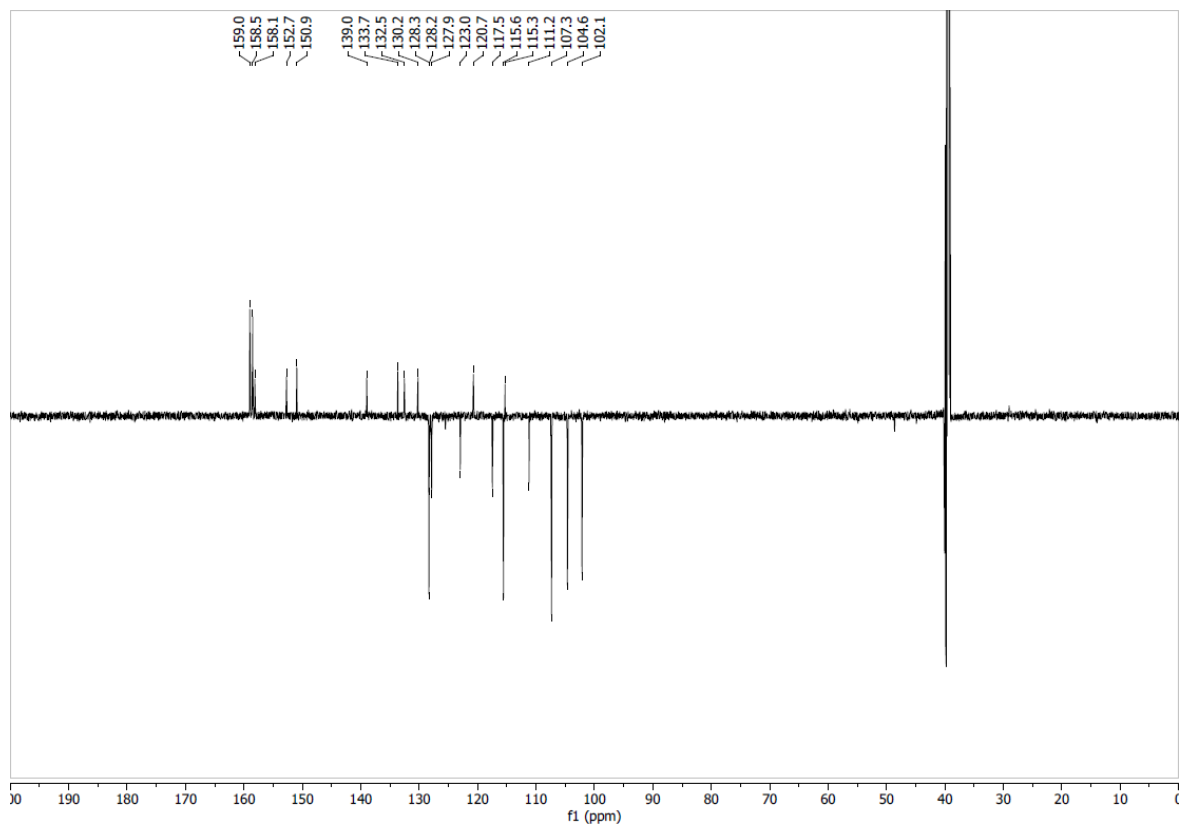

$^{13}\text{C}$ -DEPTQ NMR spectrum of compound **16** in  $\text{DMSO-}d_6$  at 151 MHz

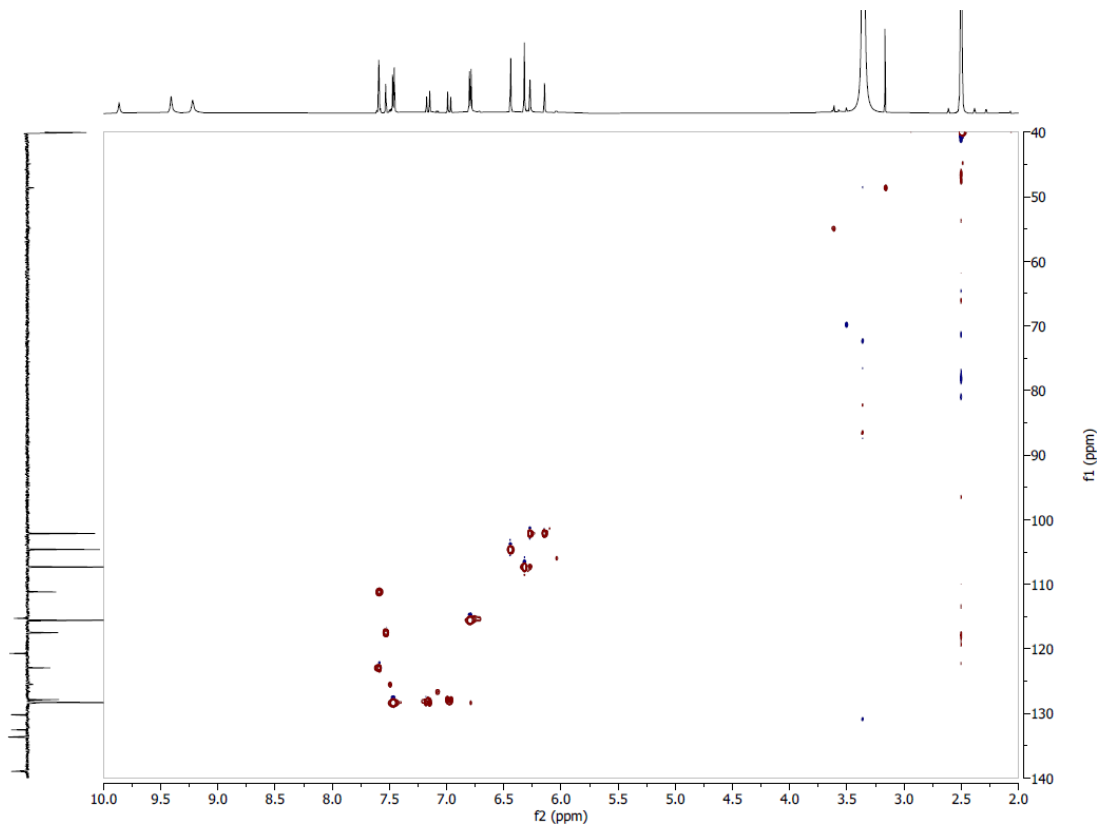

Edited HSQC NMR spectrum of compound **16** in  $\text{DMSO-}d_6$

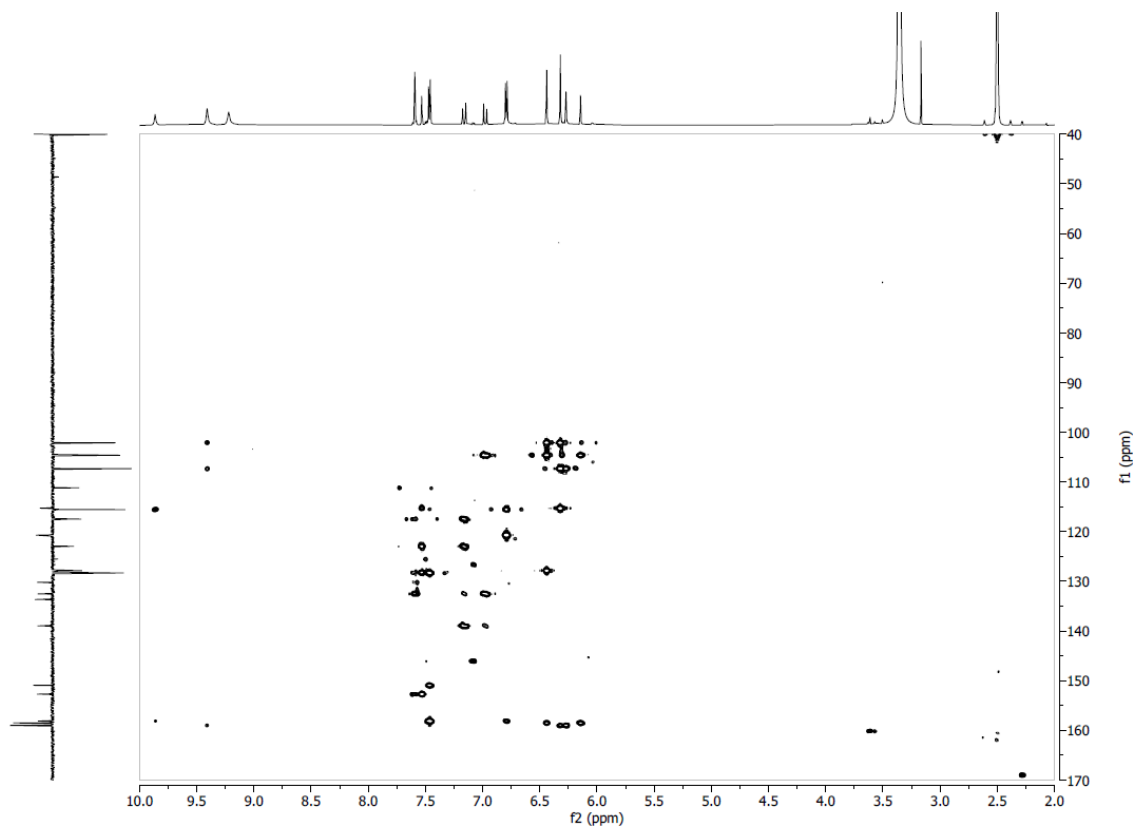

HMBC NMR spectrum of compound **16** in DMSO-*d*<sub>6</sub>

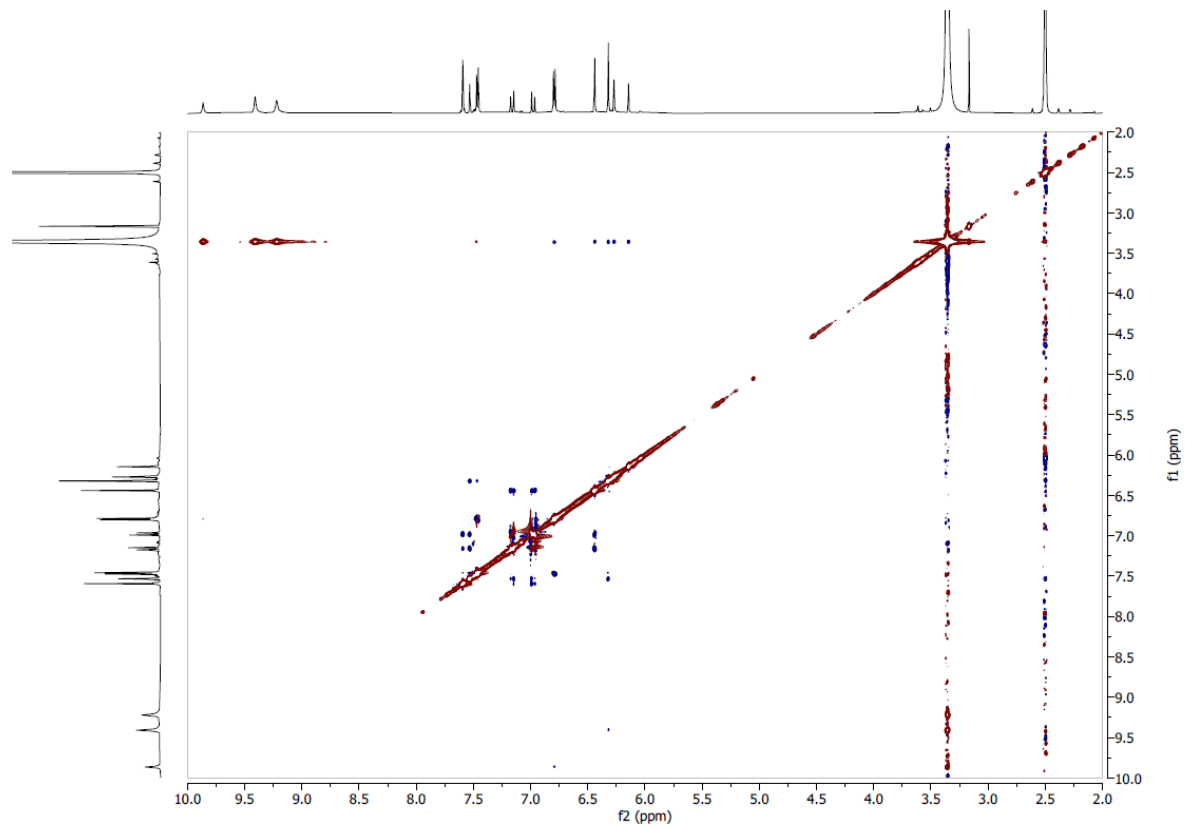

ROESY NMR spectrum of compound **16** in DMSO-*d*<sub>6</sub>

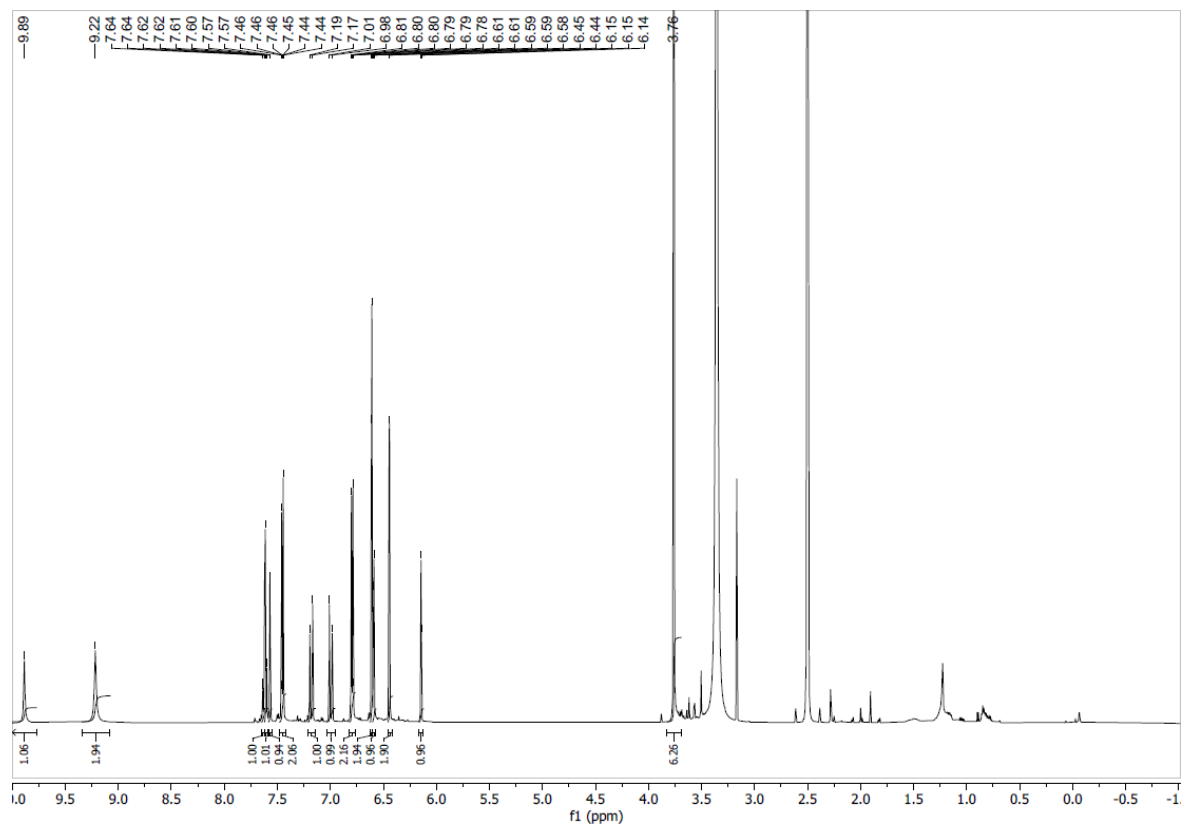

$^1\text{H}$  NMR spectrum of compound **17** in  $\text{DMSO-}d_6$  at 600 MHz

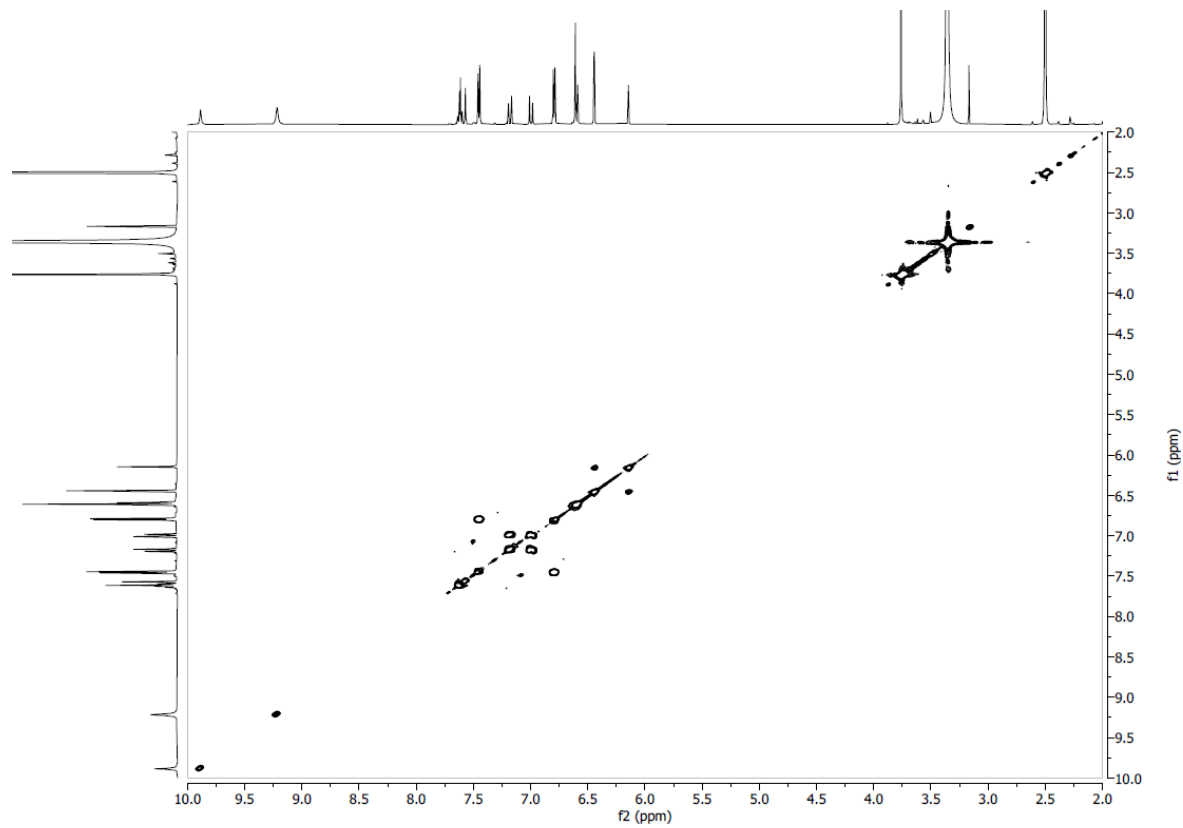

COSY NMR spectrum of compound **17** in  $\text{DMSO-}d_6$



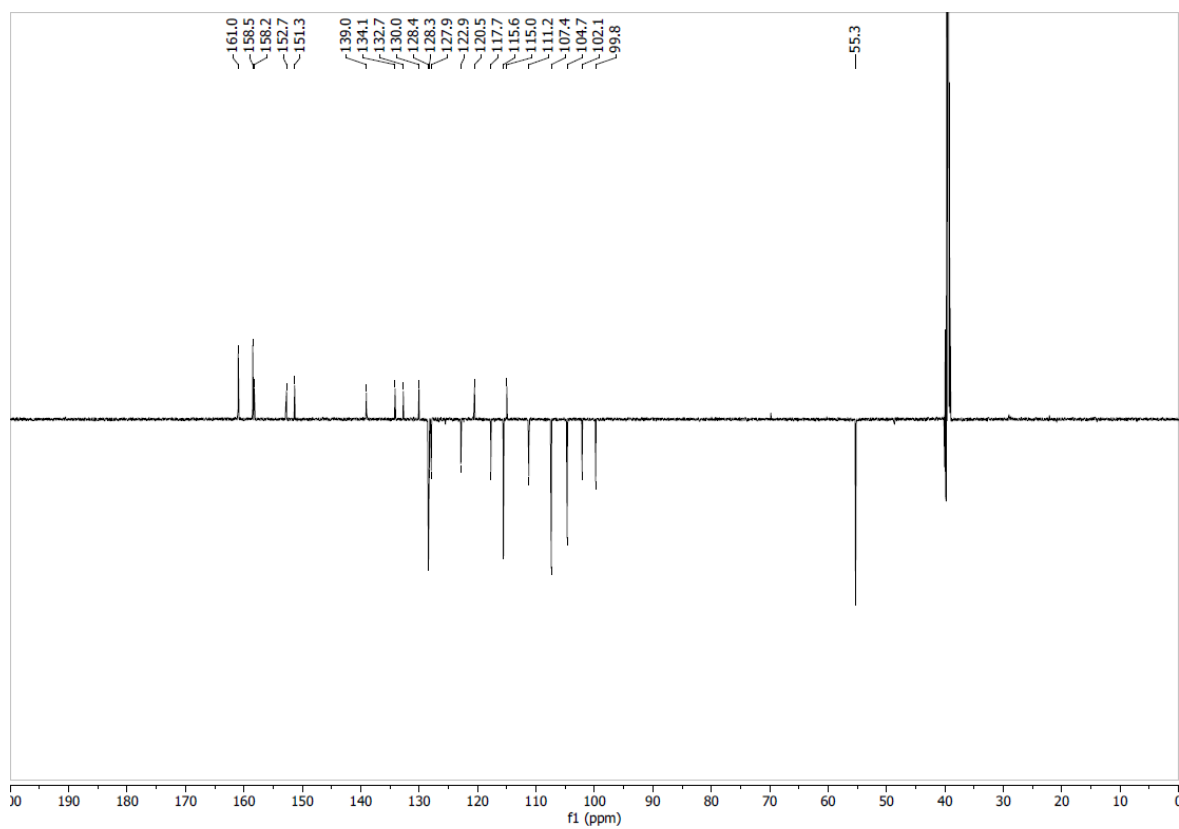

$^{13}\text{C}$ -DEPTQ NMR spectrum of compound **17** in  $\text{DMSO-}d_6$  at 151 MHz

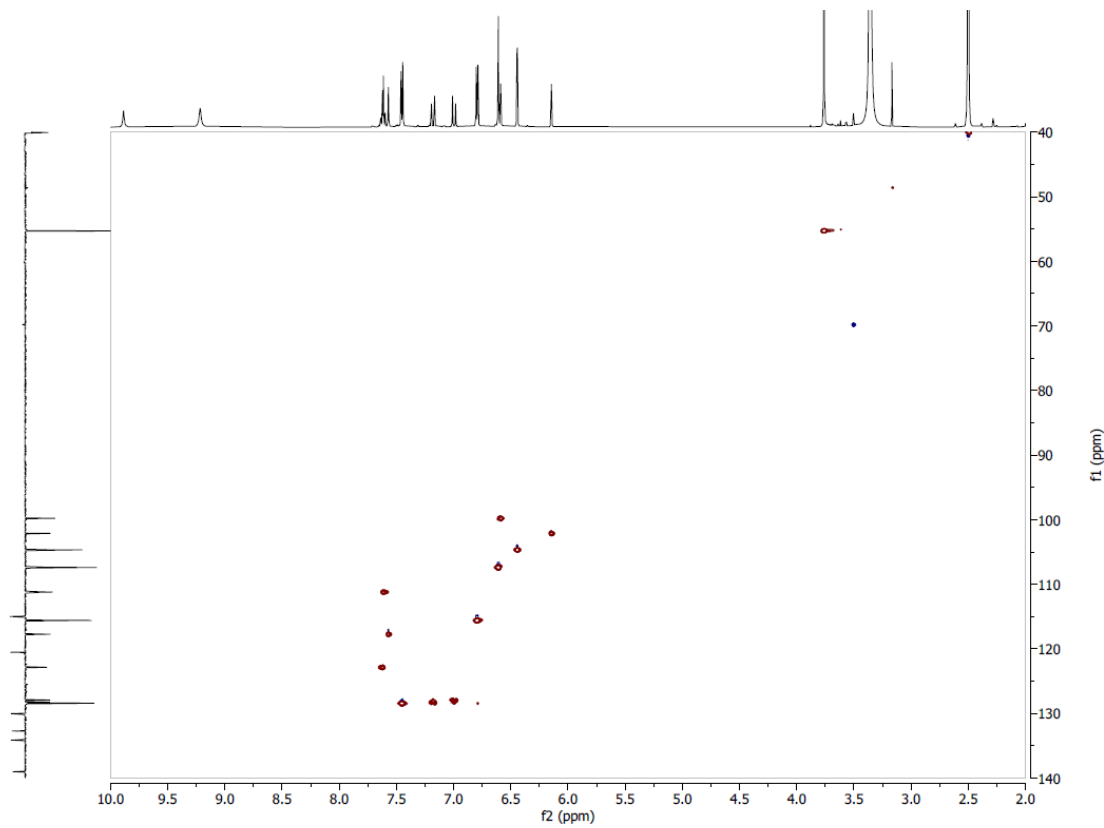

Edited HSQC NMR spectrum of compound **17** in  $\text{DMSO-}d_6$

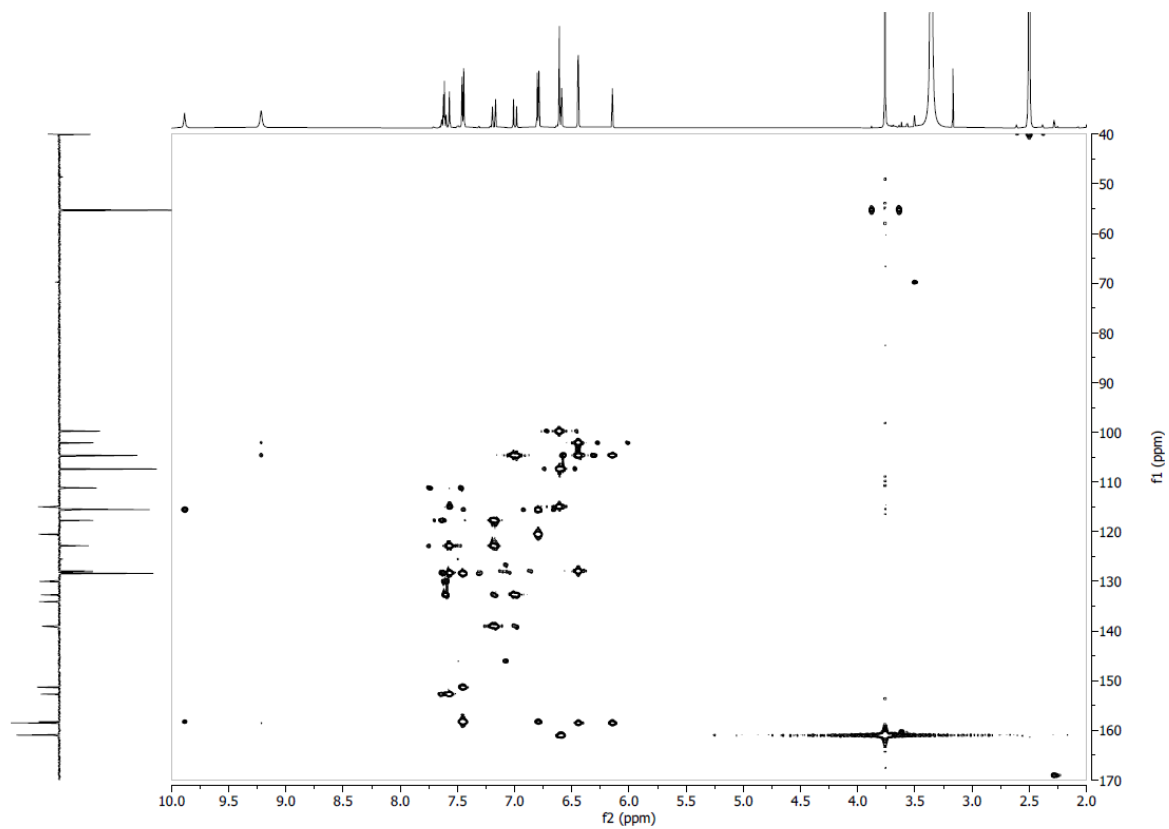

HMBC NMR spectrum of compound **17** in DMSO-*d*<sub>6</sub>

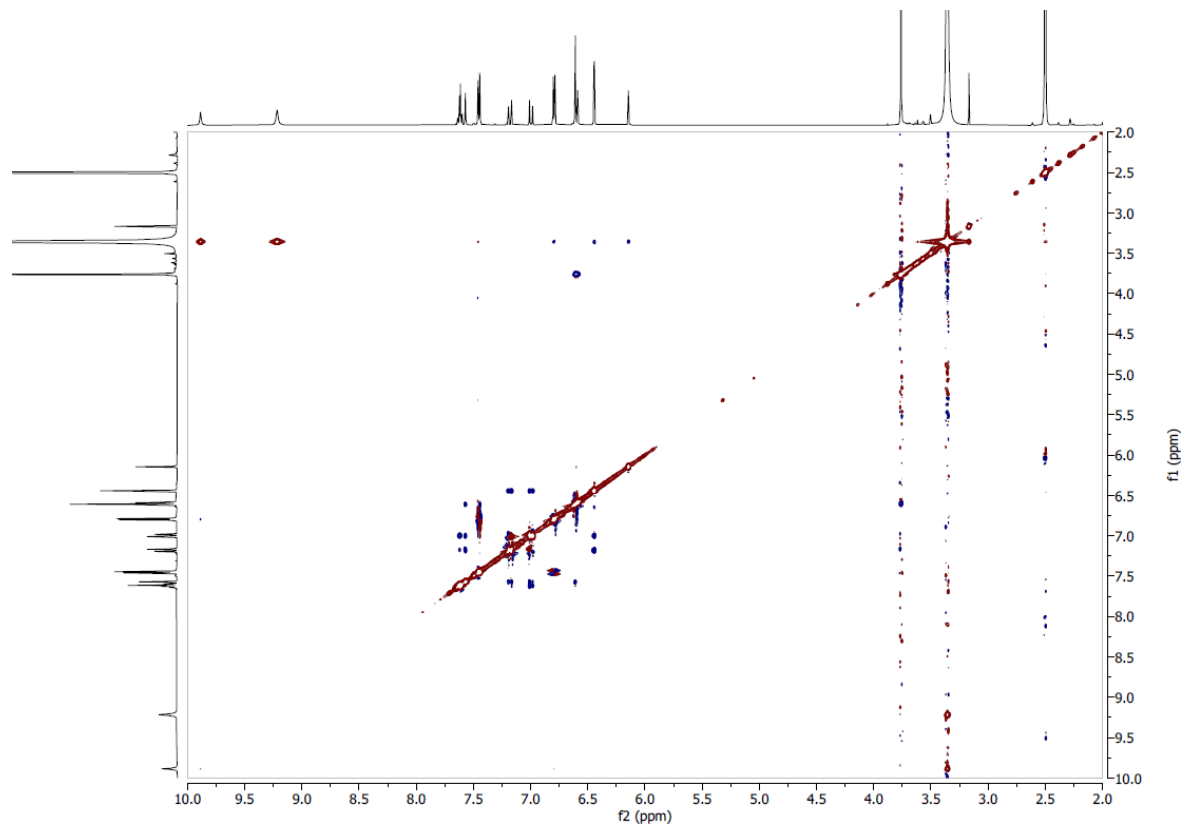

ROESY NMR spectrum of compound **17** in DMSO-*d*<sub>6</sub>

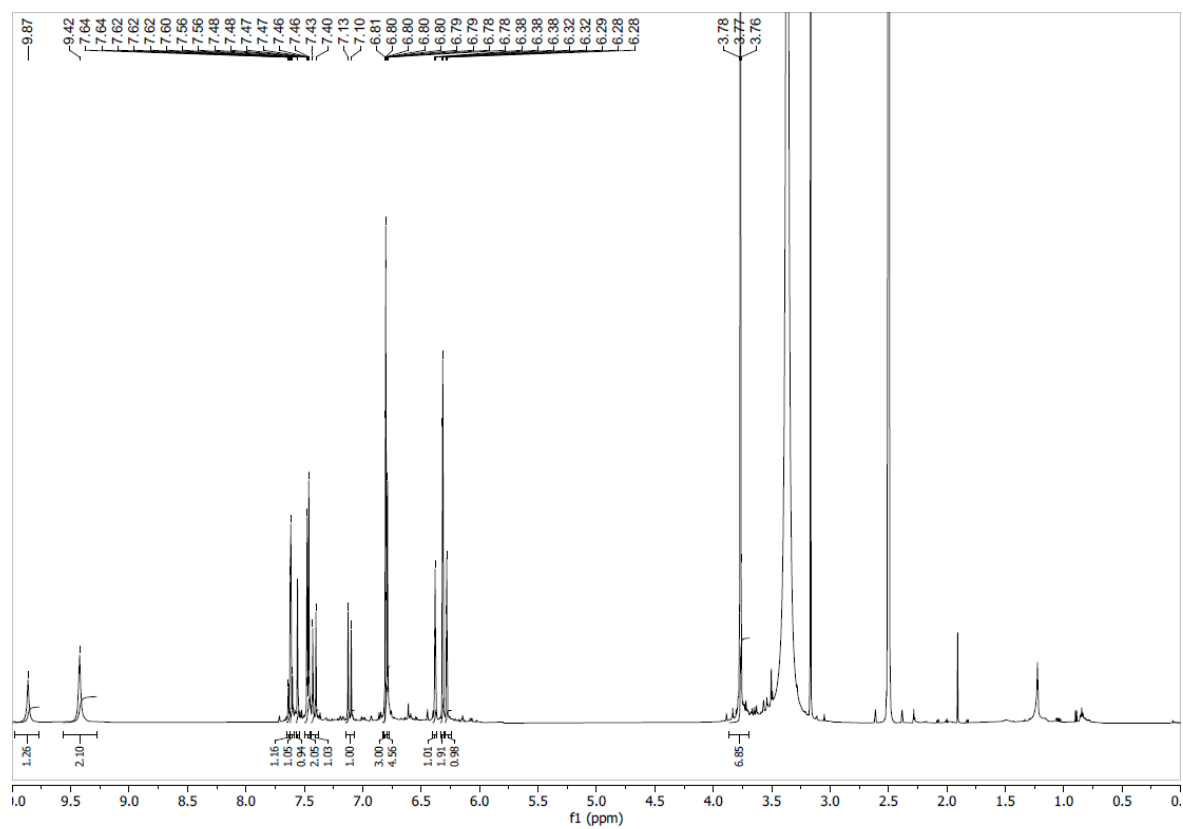

$^1\text{H}$  NMR spectrum of compound **18** in  $\text{DMSO-}d_6$  at 600 MHz

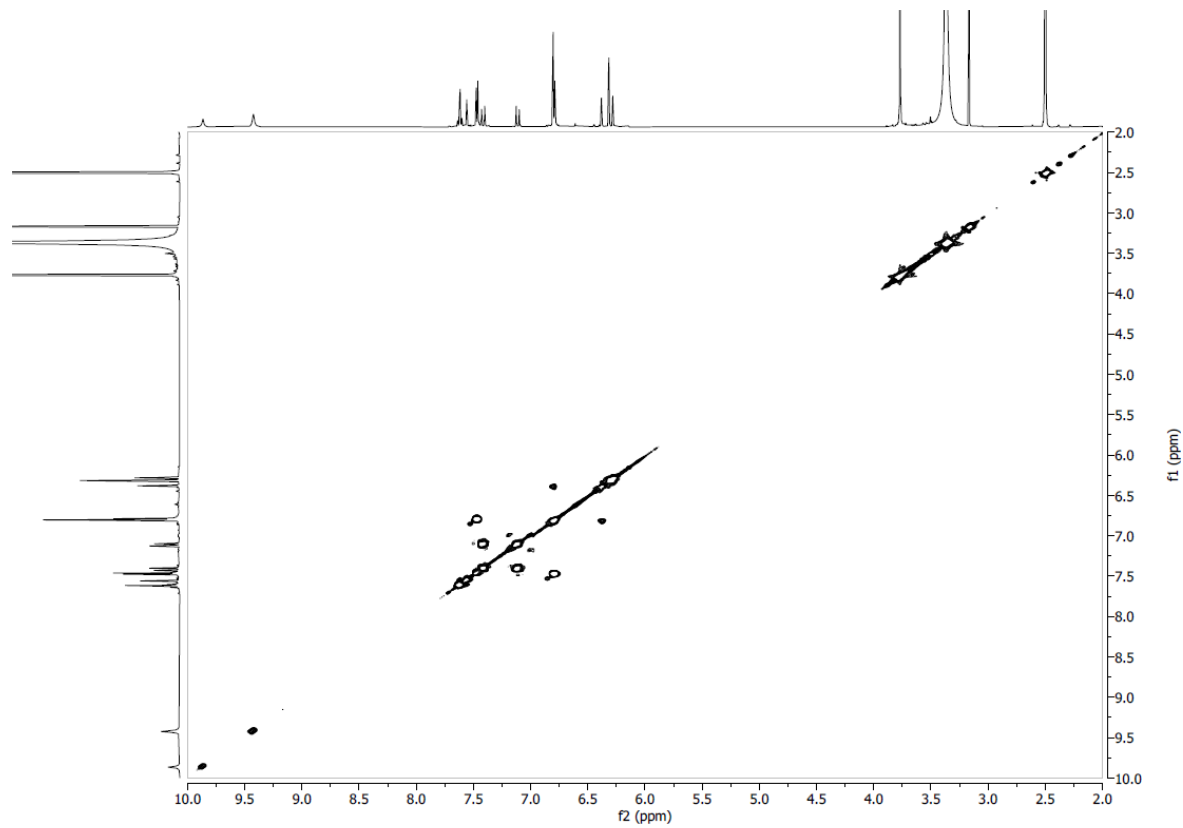

COSY NMR spectrum of compound **18** in  $\text{DMSO-}d_6$

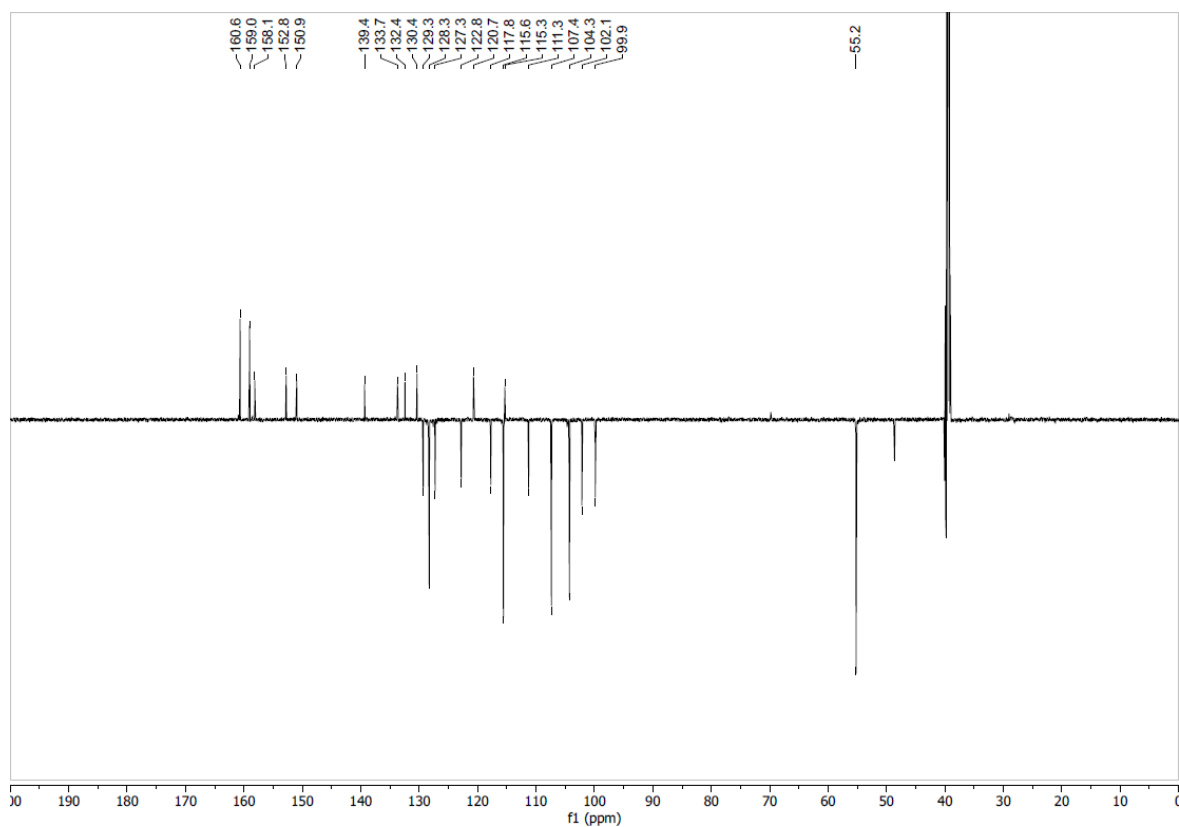

$^{13}\text{C}$ -DEPTQ NMR spectrum of compound **18** in  $\text{DMSO-}d_6$  at 151 MHz

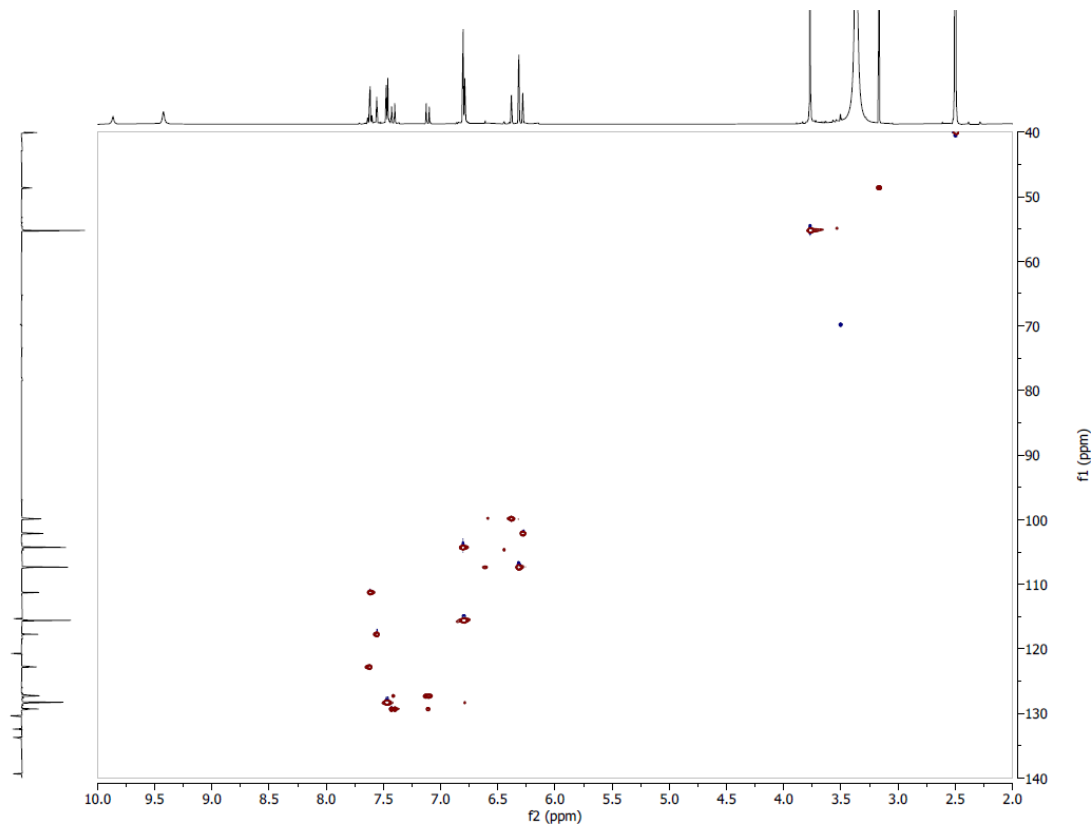

Edited HSQC NMR spectrum of compound **18** in  $\text{DMSO-}d_6$

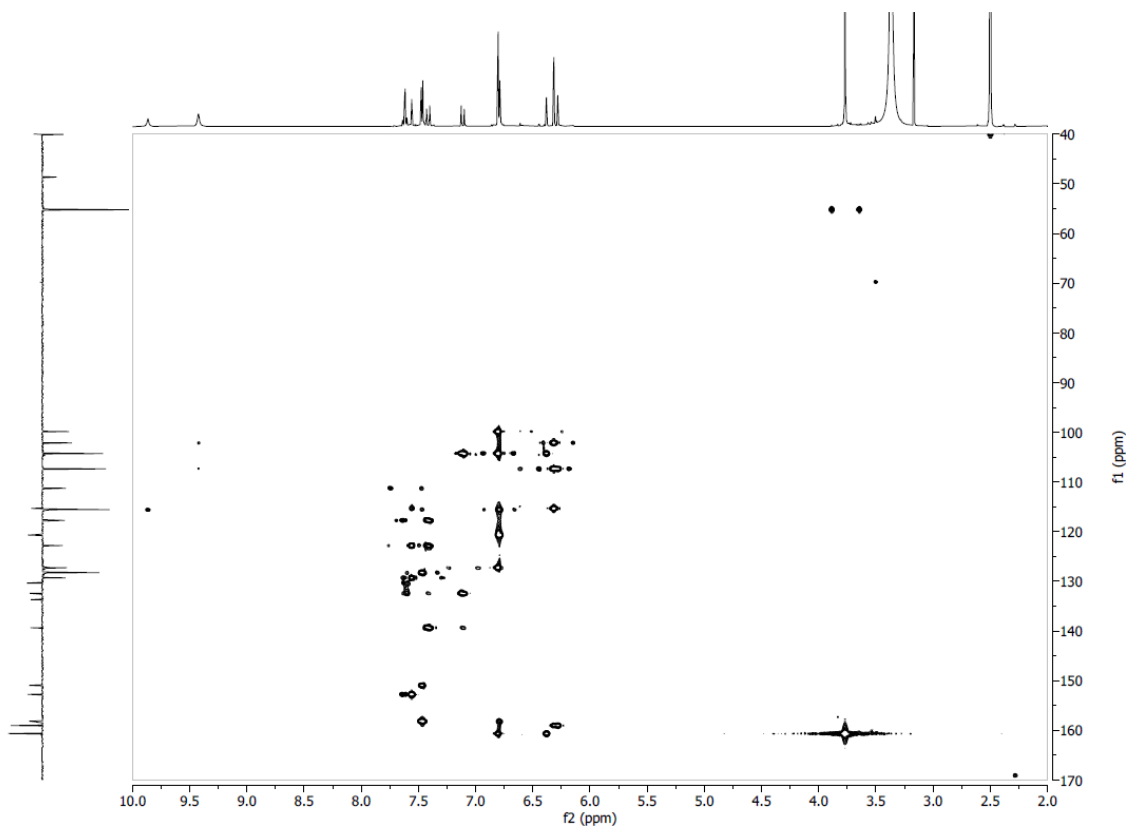

HMBC NMR spectrum of compound **18** in DMSO- $d_6$

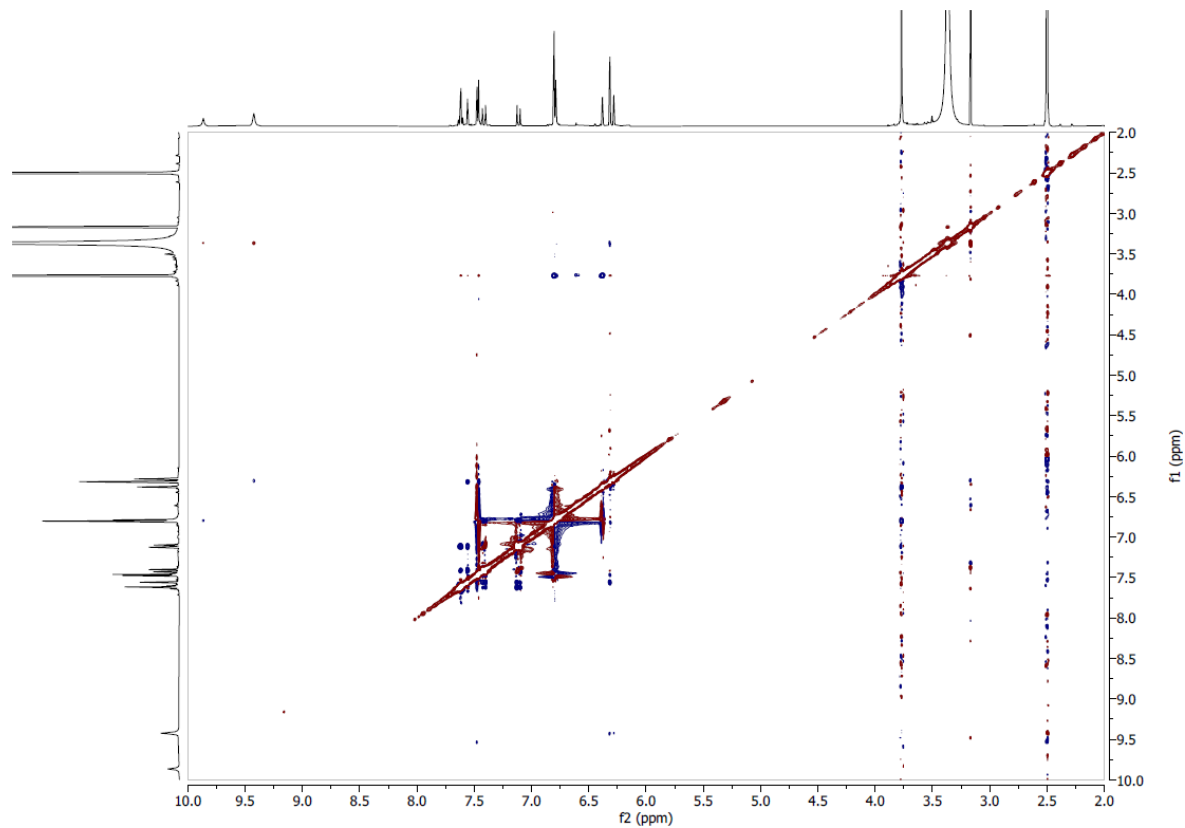

ROESY NMR spectrum of compound **18** in DMSO- $d_6$

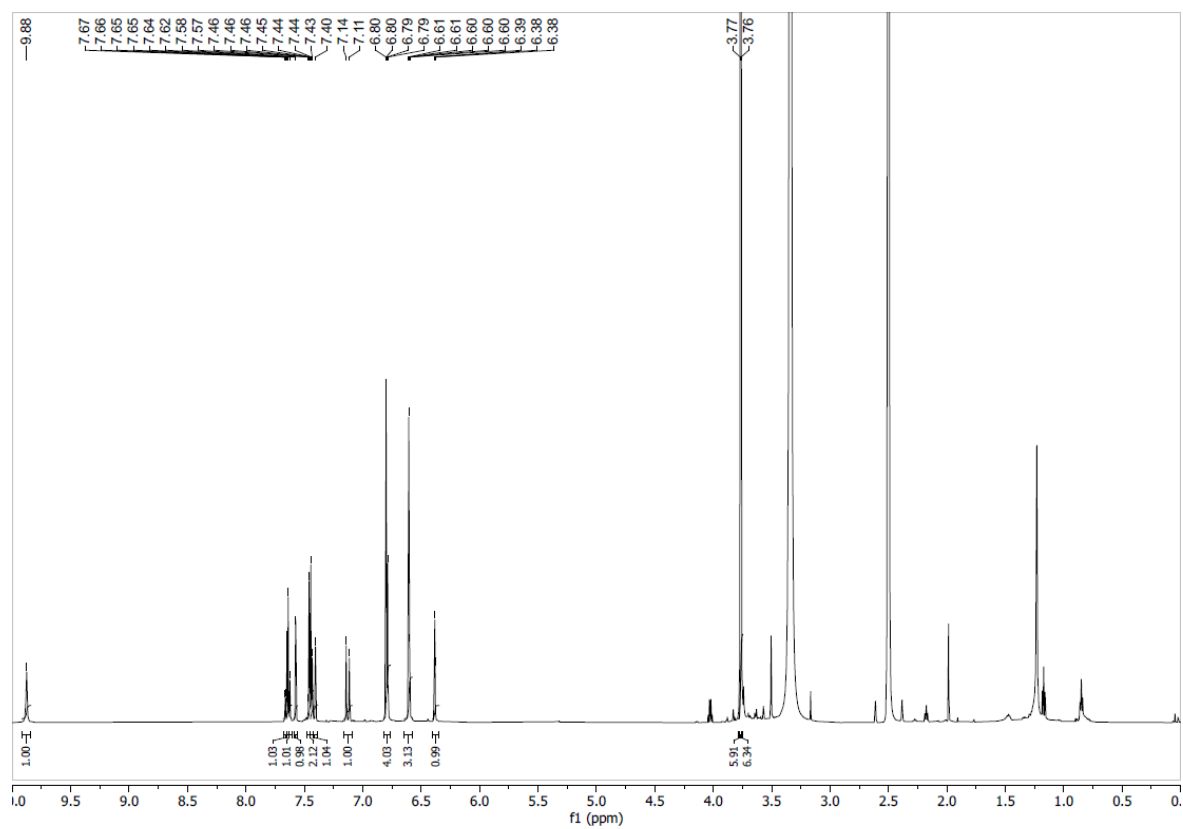

$^1\text{H}$  NMR spectrum of compound **19** in  $\text{DMSO-}d_6$  at 600 MHz

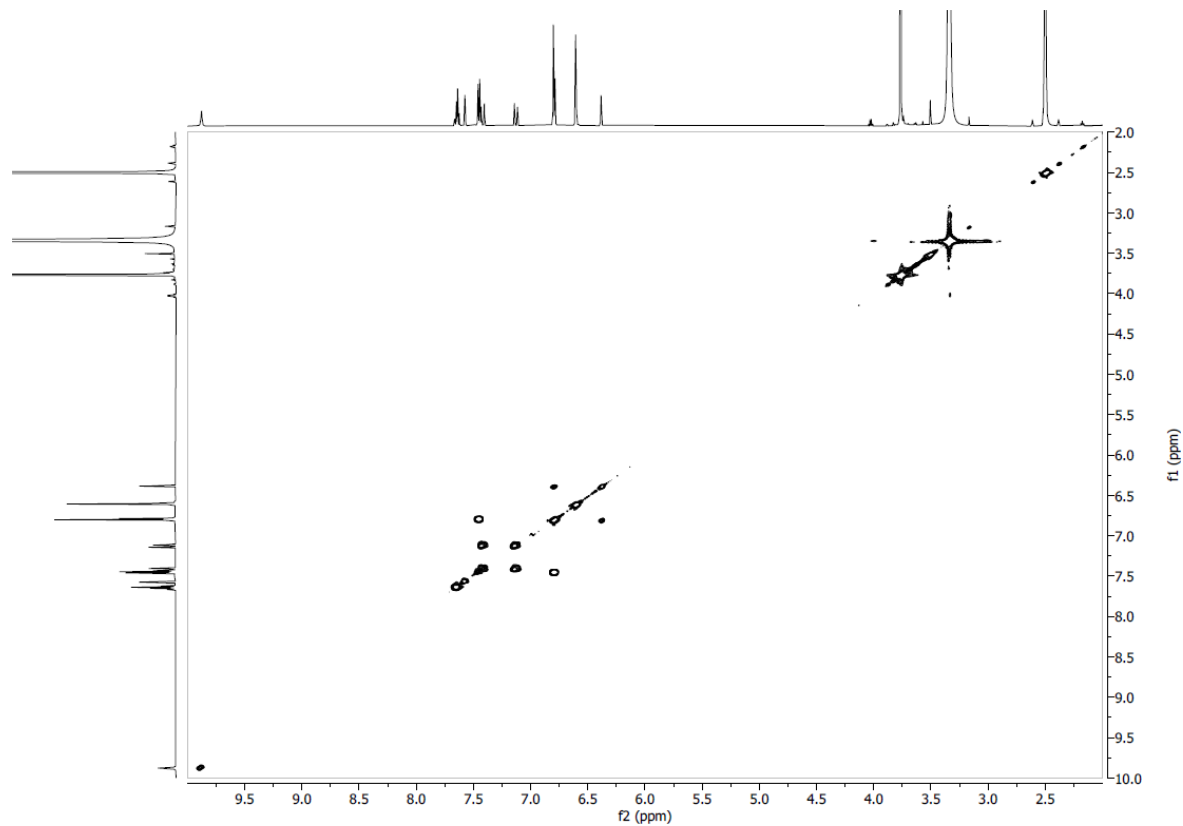

COSY NMR spectrum of compound **19** in  $\text{DMSO-}d_6$

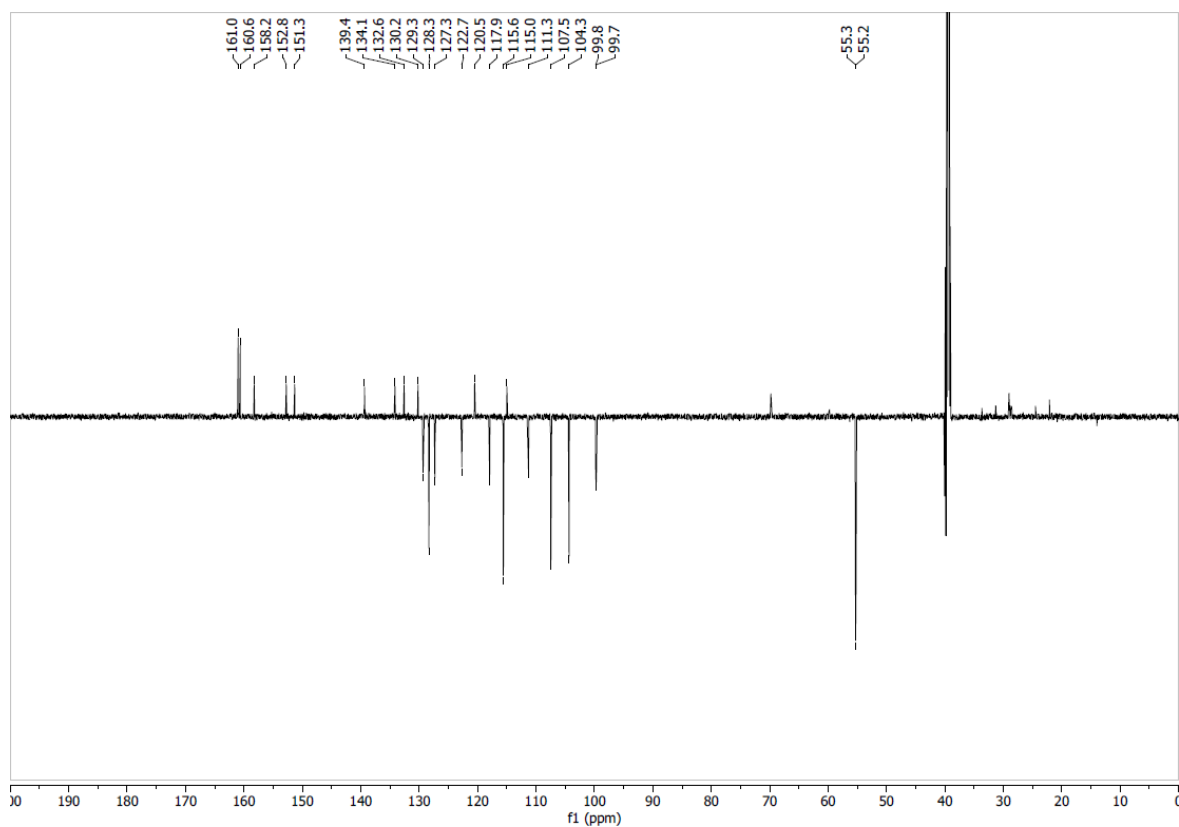

$^{13}\text{C}$ -DEPTQ NMR spectrum of compound **19** in  $\text{DMSO-}d_6$  at 151 MHz

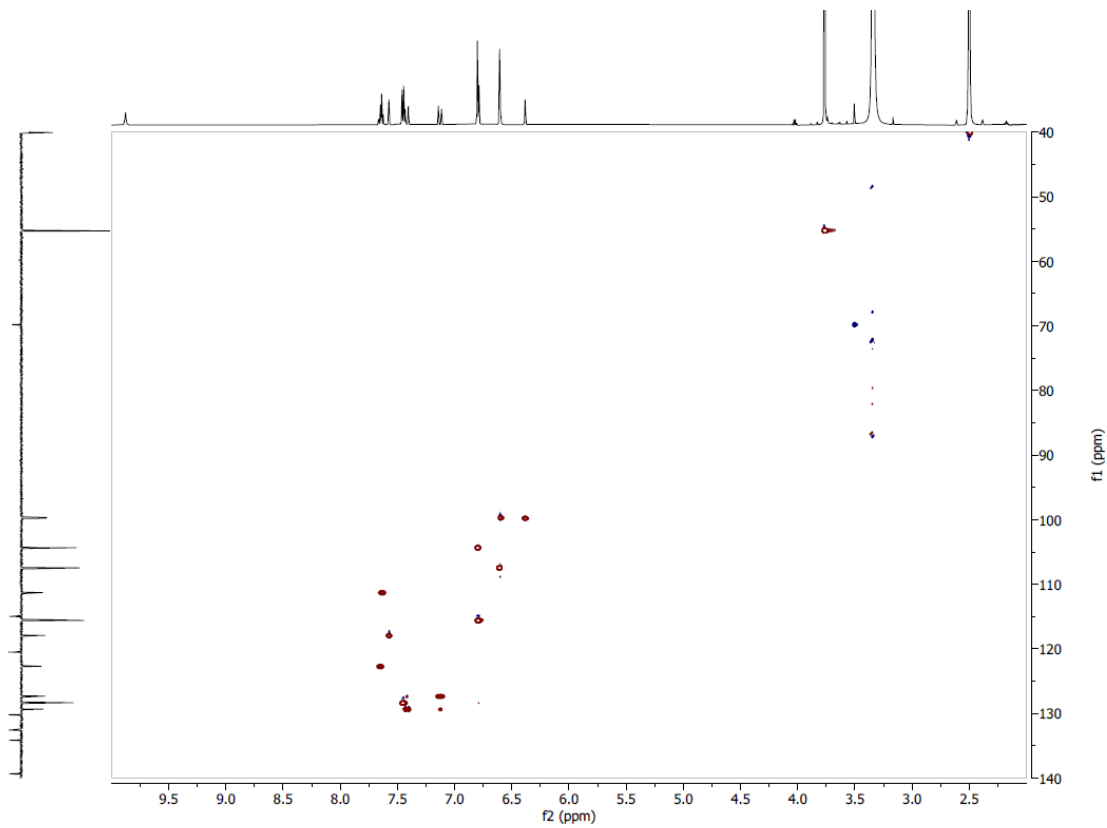

Edited HSQC NMR spectrum of compound **19** in  $\text{DMSO-}d_6$

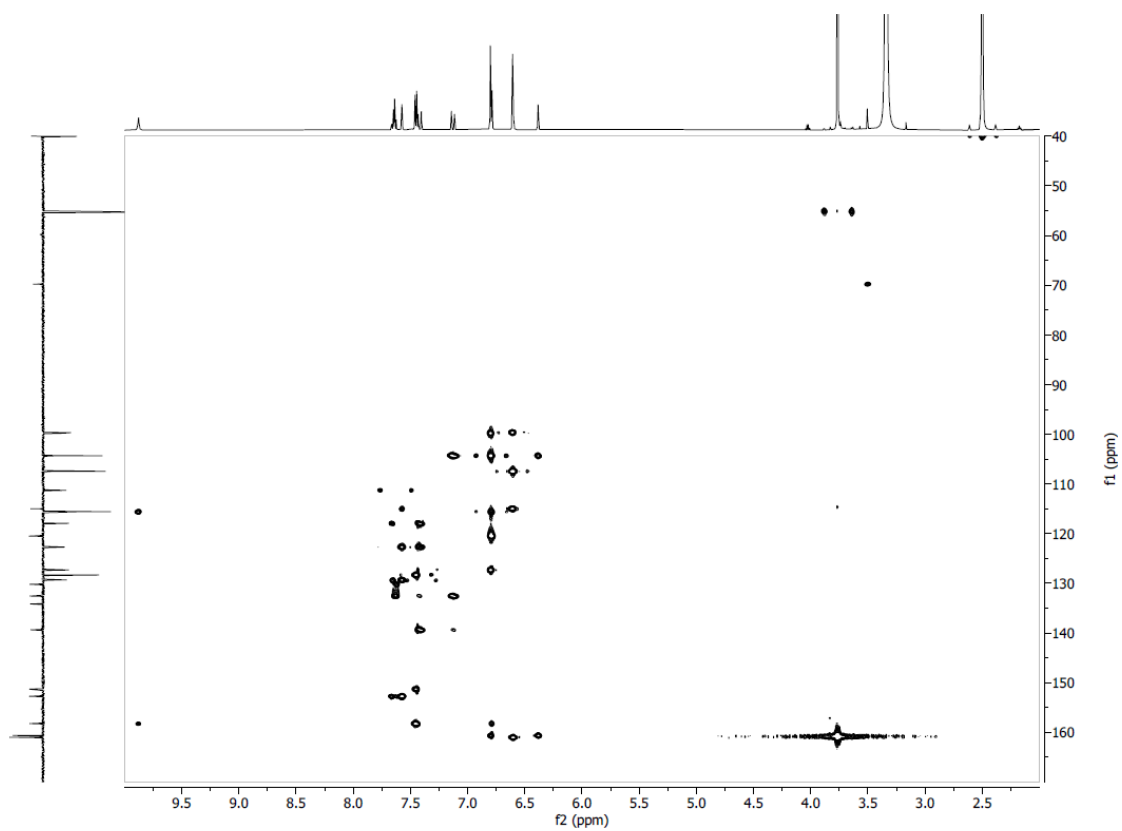

HMBC NMR spectrum of compound **19** in DMSO- $d_6$

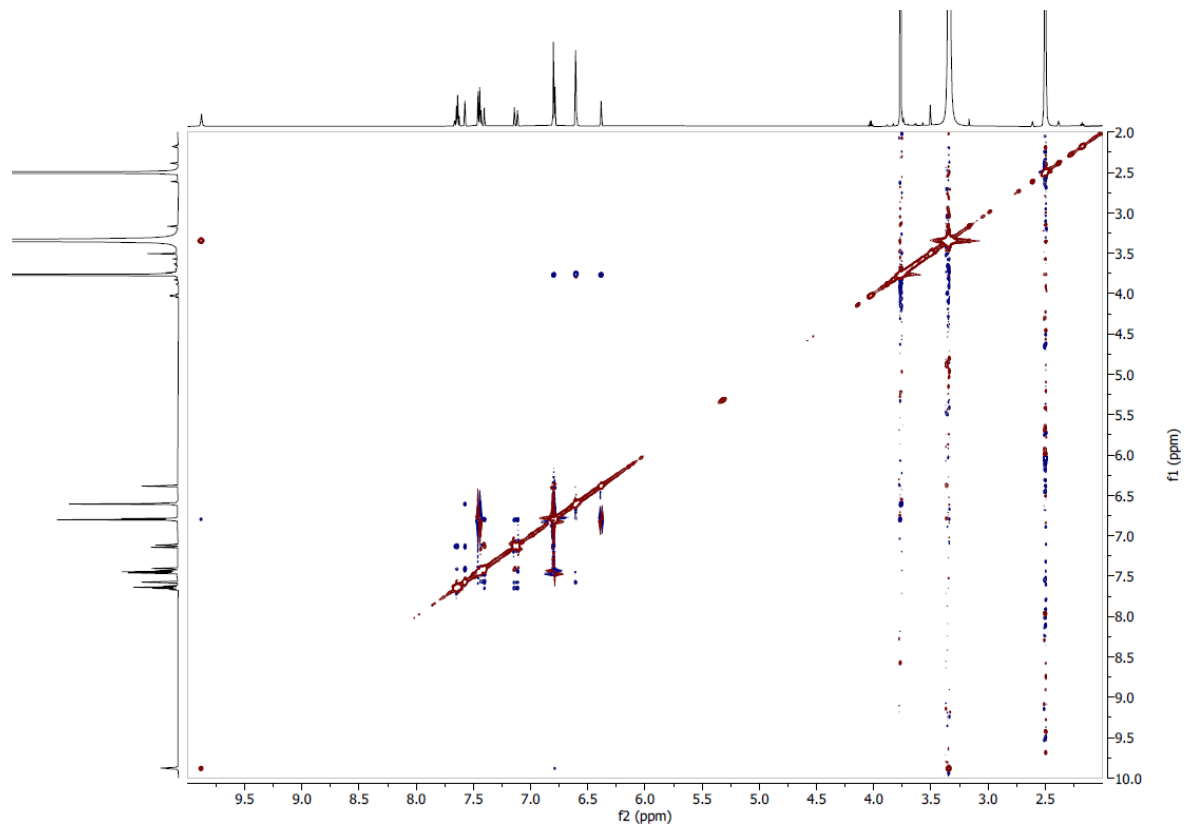

ROESY NMR spectrum of compound **19** in DMSO- $d_6$



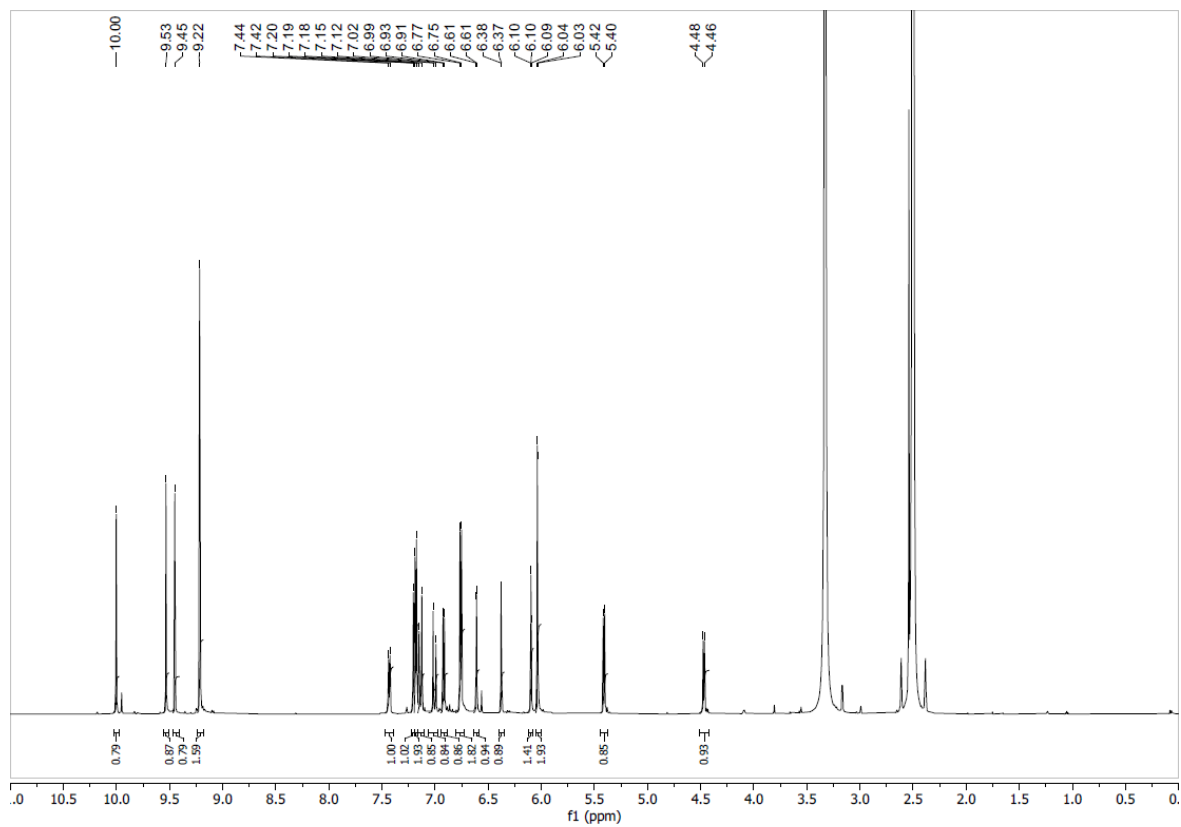

$^1\text{H}$  NMR spectrum of compound **20** in  $\text{DMSO-}d_6$  at 600 MHz

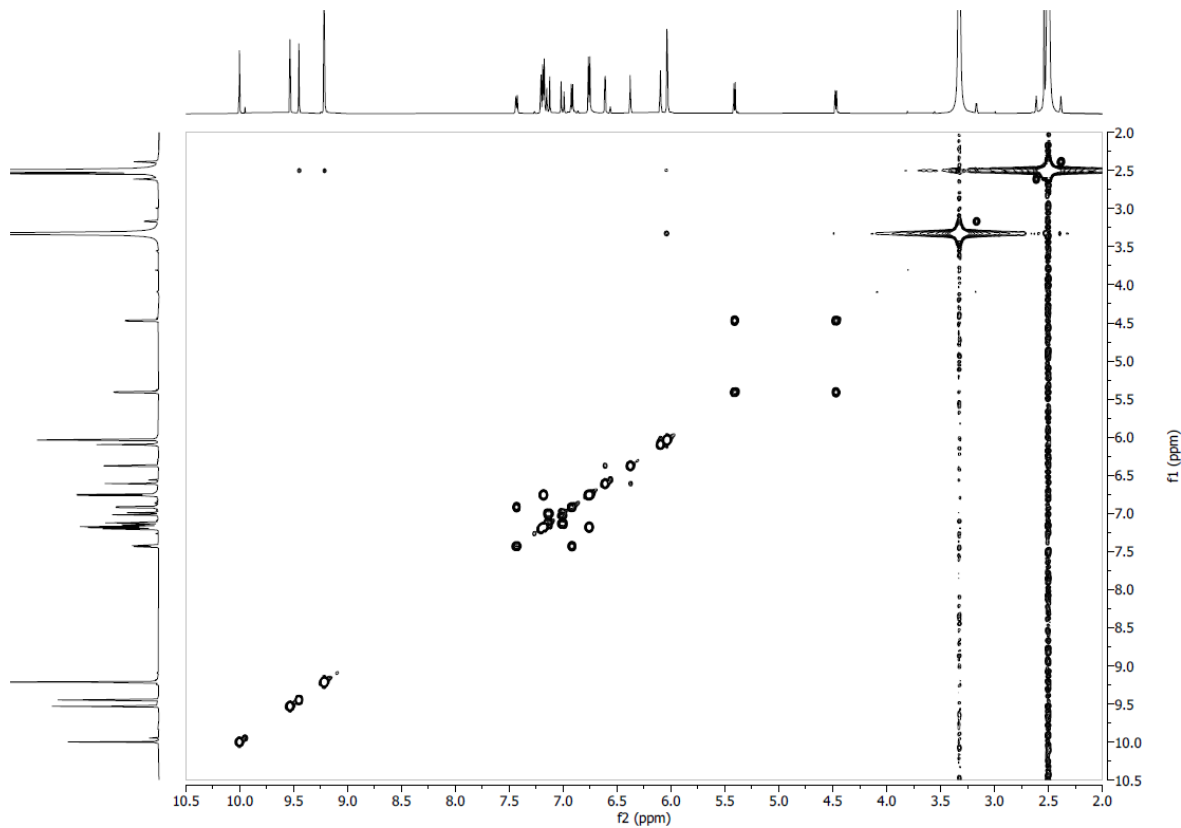

COSY NMR spectrum of compound **20** in  $\text{DMSO-}d_6$

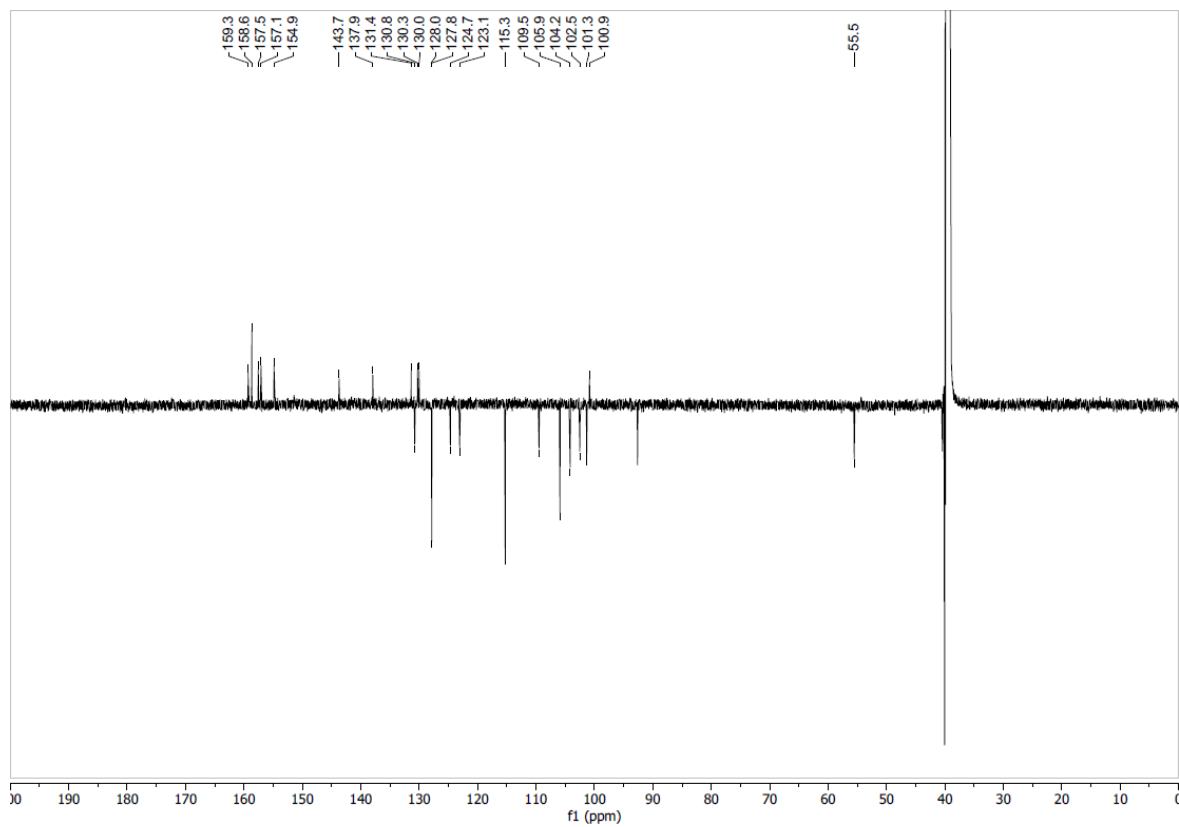

$^{13}\text{C}$ -DEPTQ NMR spectrum of compound **20** in  $\text{DMSO-}d_6$  at 151 MHz

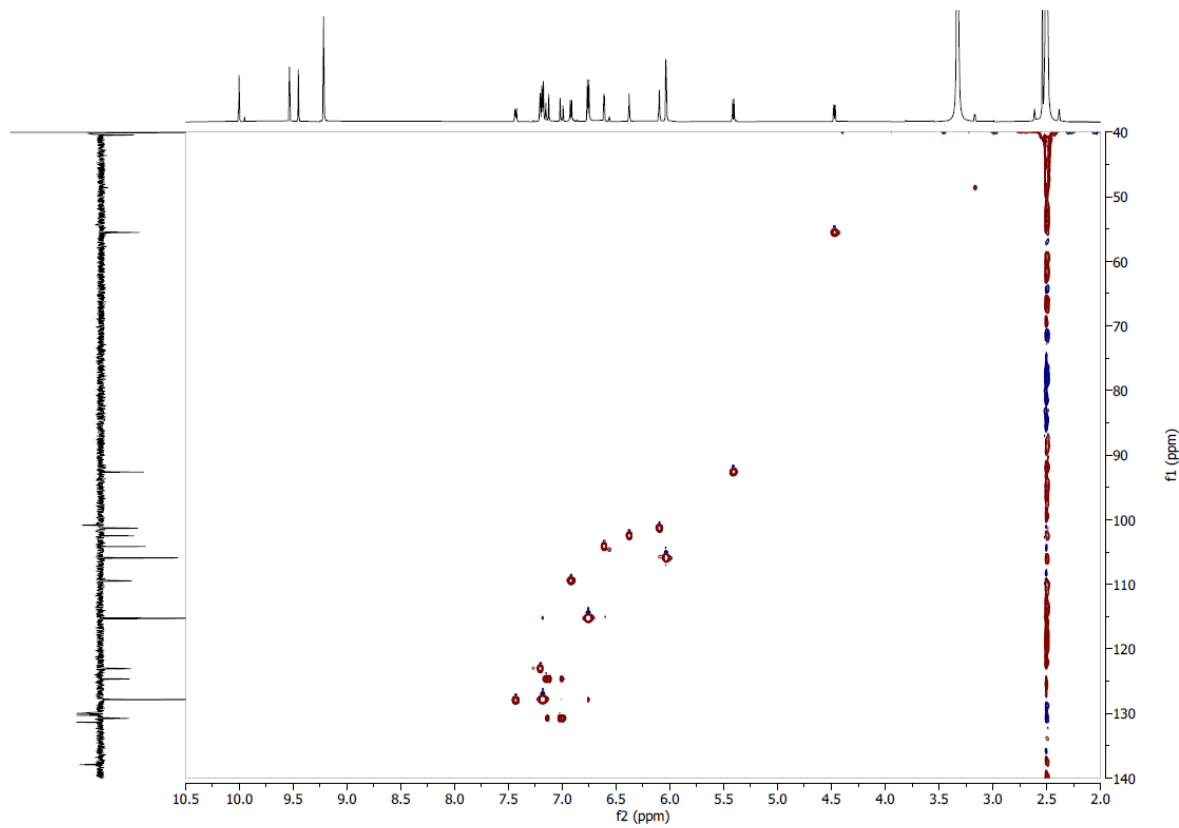

Edited HSQC NMR spectrum of compound **20** in  $\text{DMSO-}d_6$

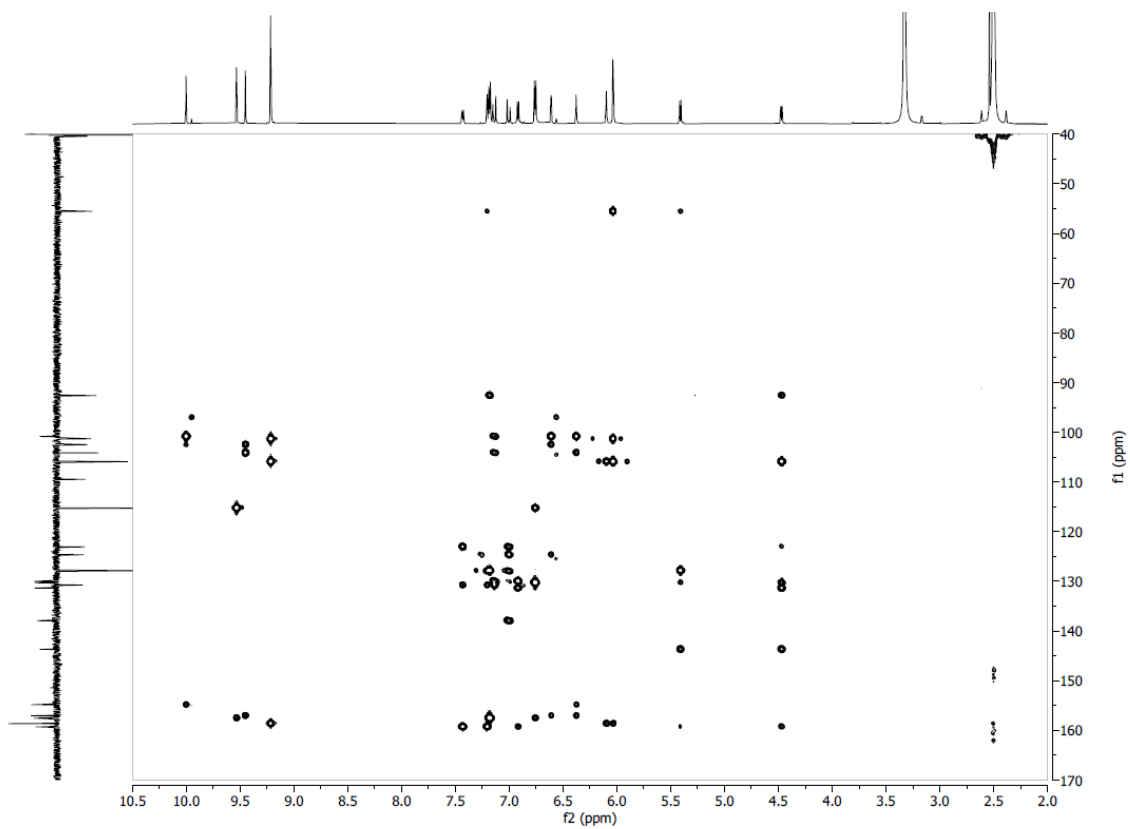

HMBC NMR spectrum of compound **20** in DMSO- $d_6$

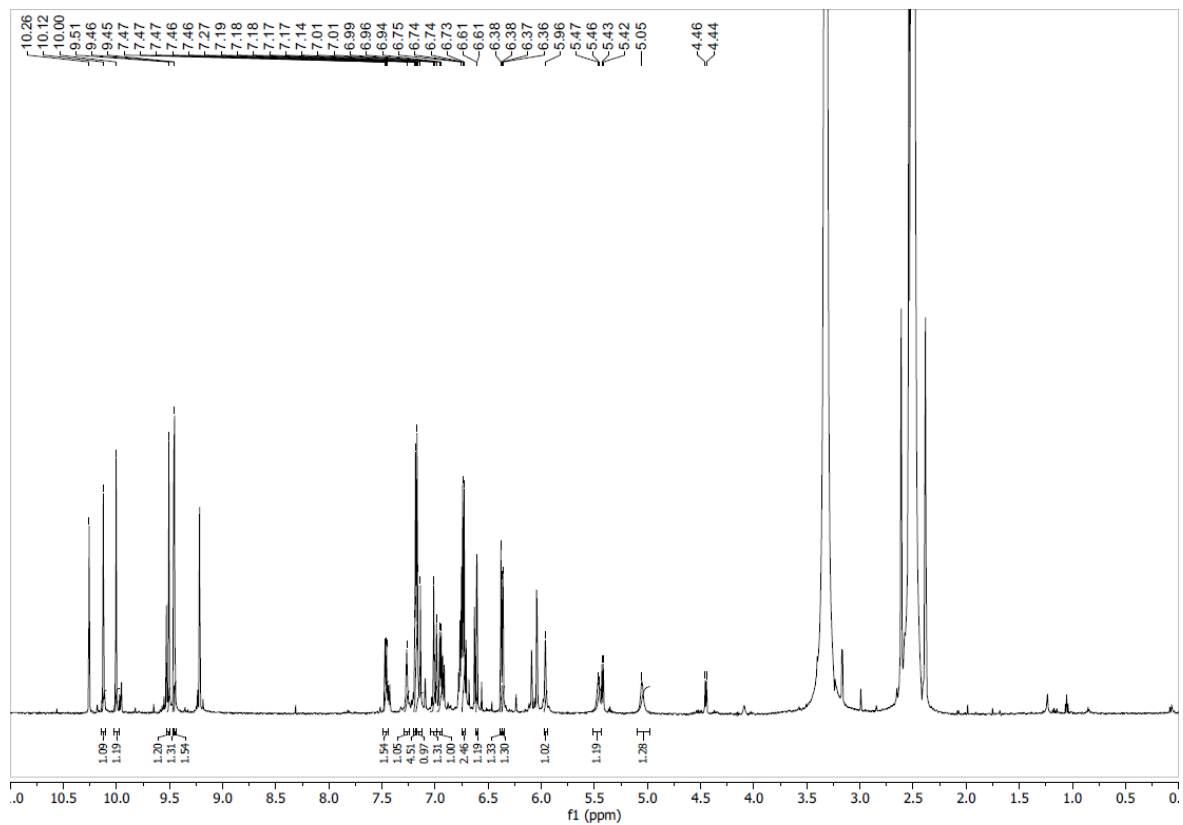

$^1\text{H}$  NMR spectrum of compound **21** in DMSO- $d_6$  at 600 MHz

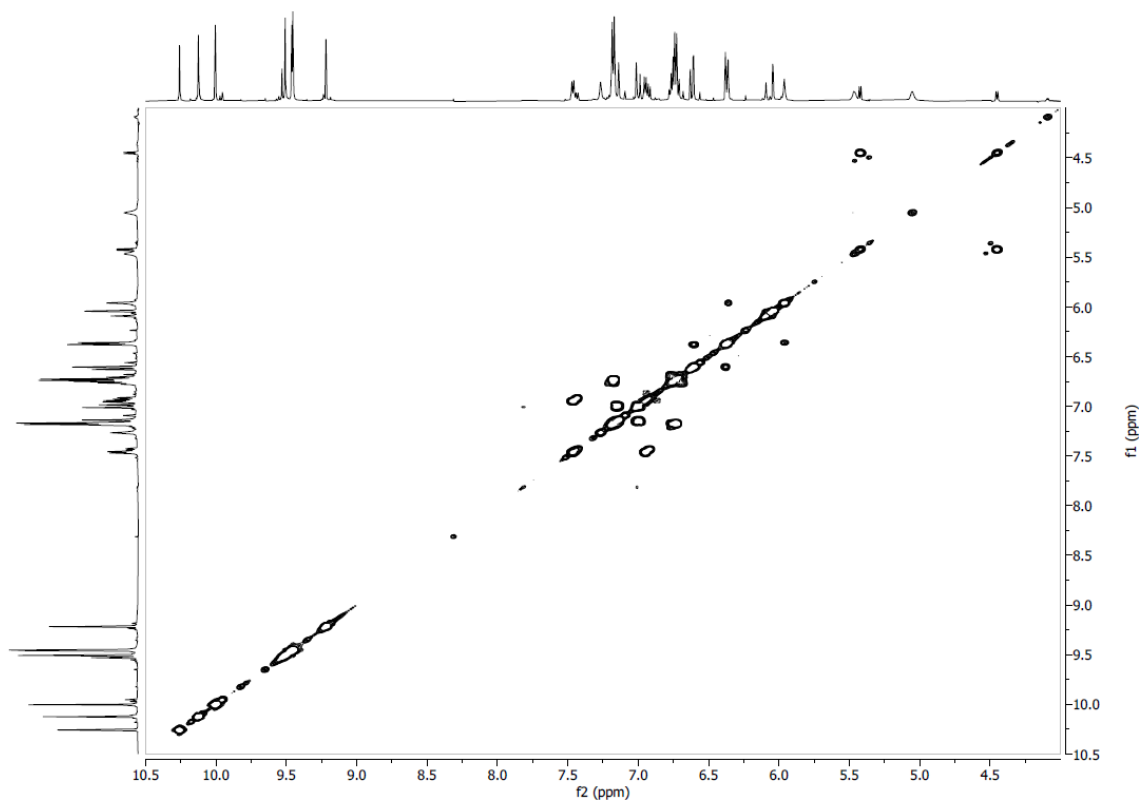

COSY NMR spectrum of compound **21** in DMSO-*d*<sub>6</sub>

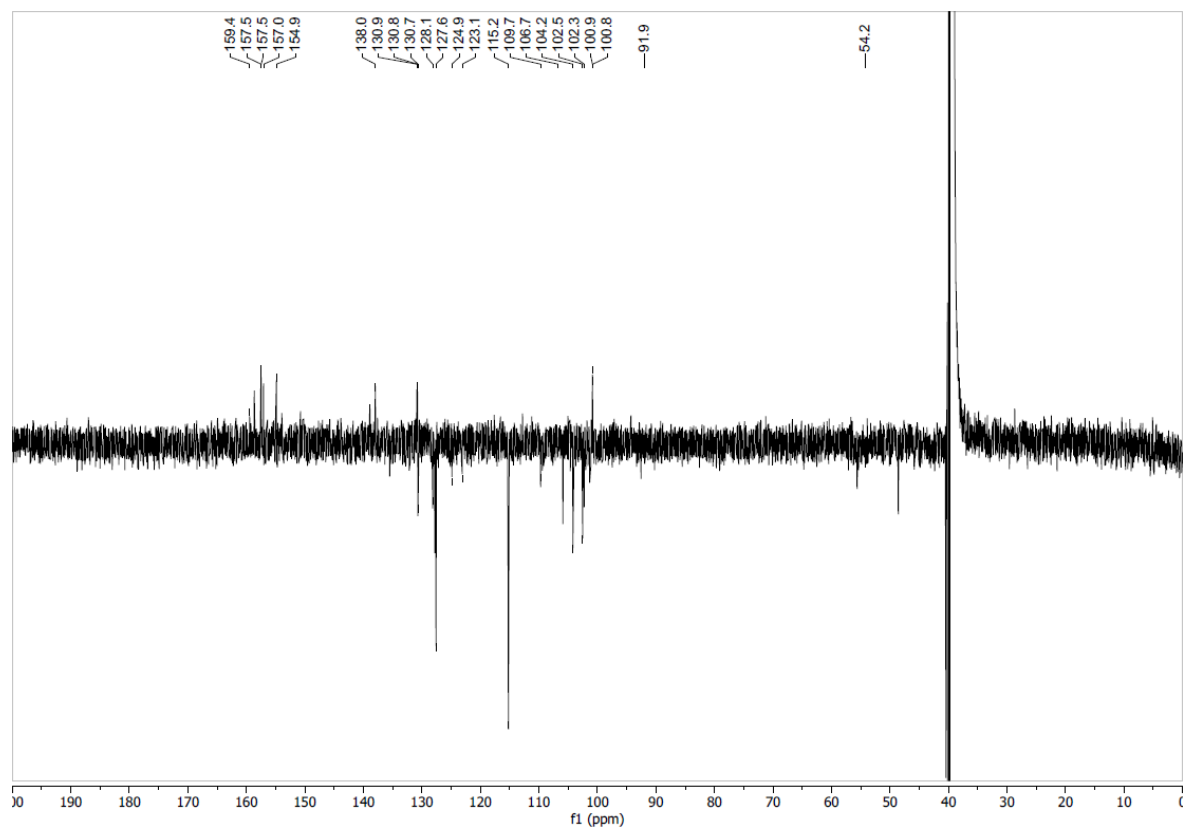

<sup>13</sup>C-DEPTQ NMR spectrum of compound **21** in DMSO-*d*<sub>6</sub> at 151 MHz

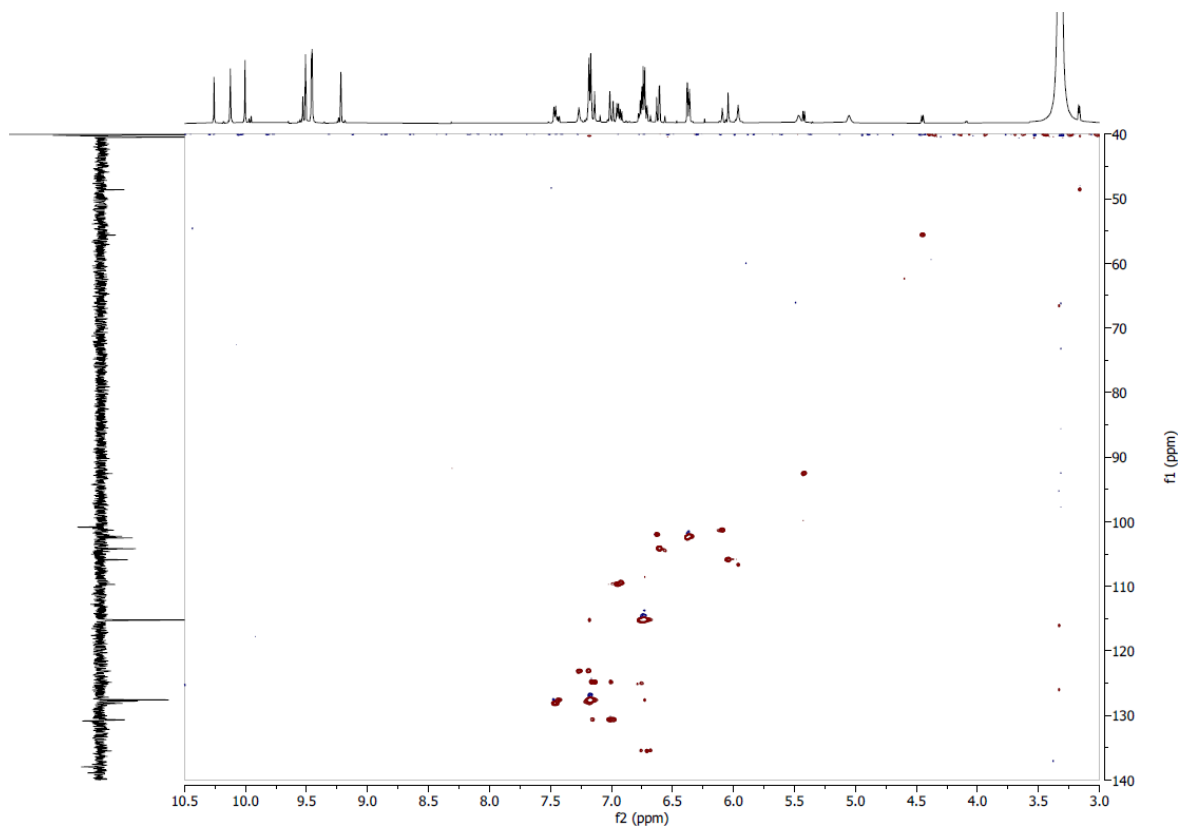

Edited HSQC NMR spectrum of compound **21** in DMSO-*d*<sub>6</sub>

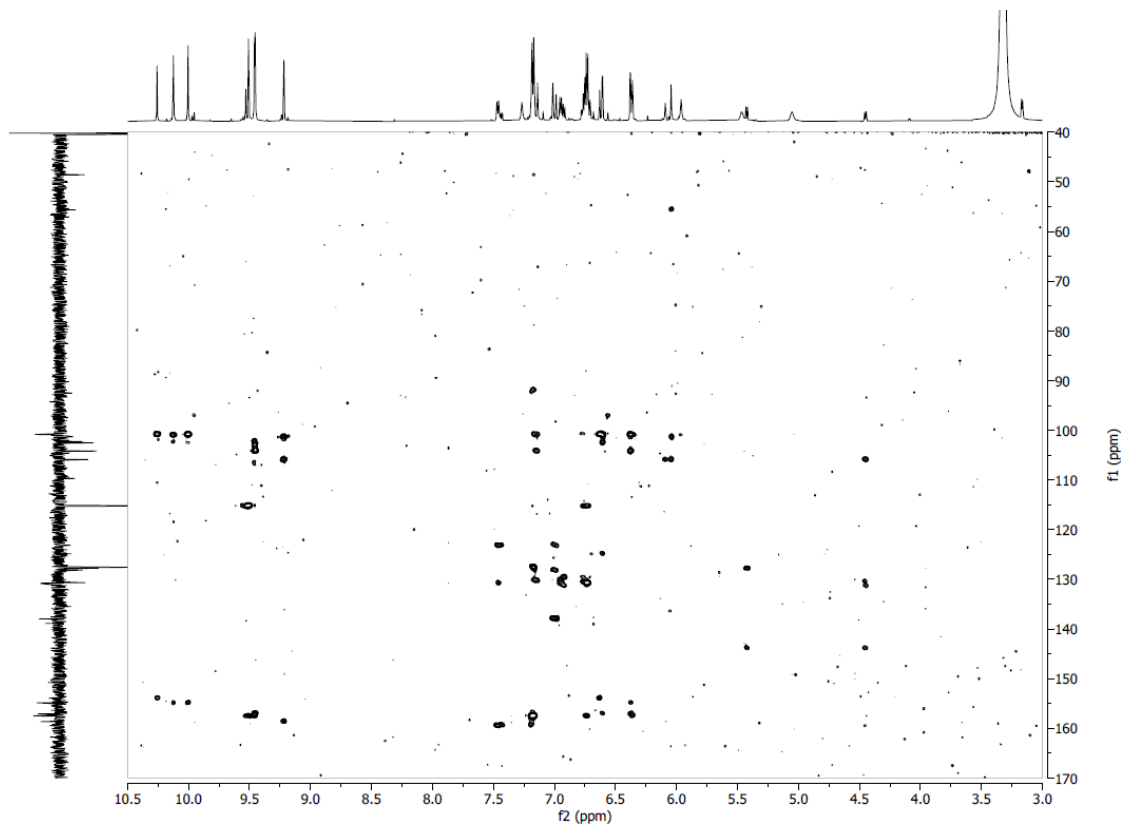

HMBC NMR spectrum of compound **21** in DMSO-*d*<sub>6</sub>

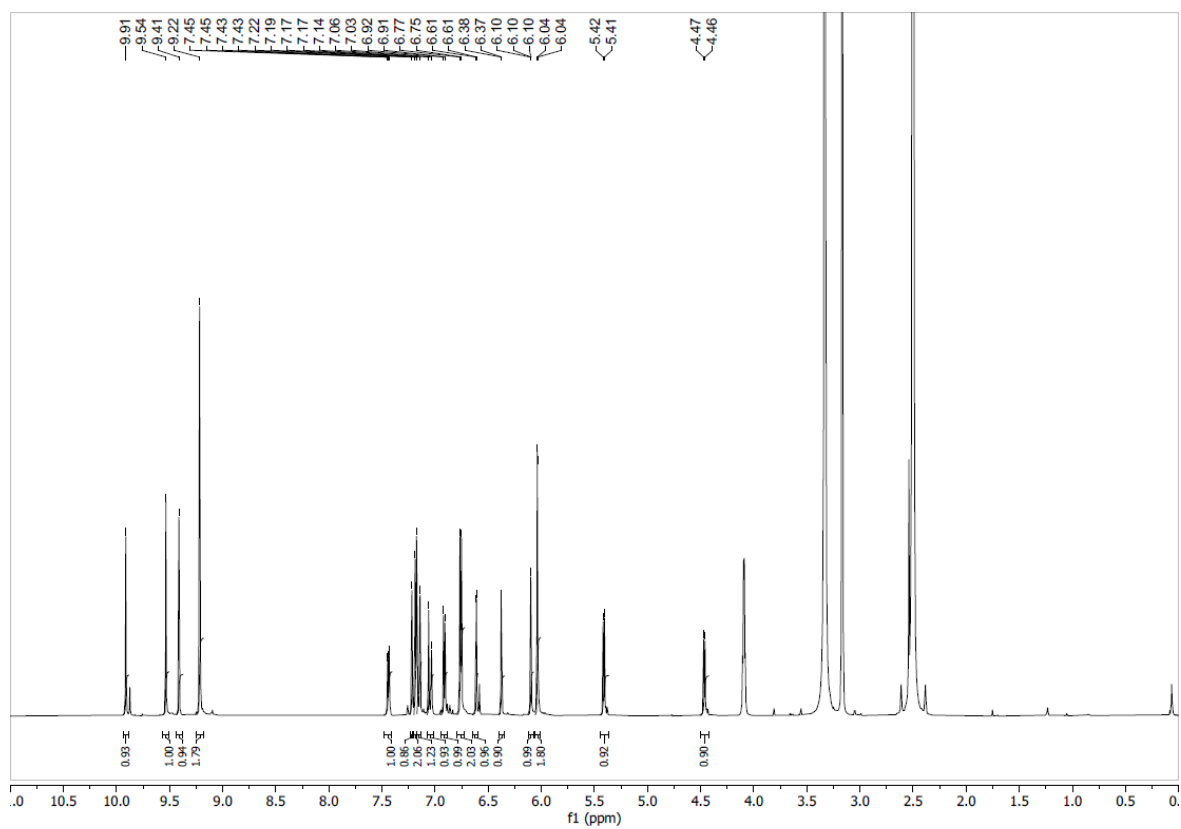

$^1\text{H}$  NMR spectrum of compound **22** in  $\text{DMSO-}d_6$  at 600 MHz

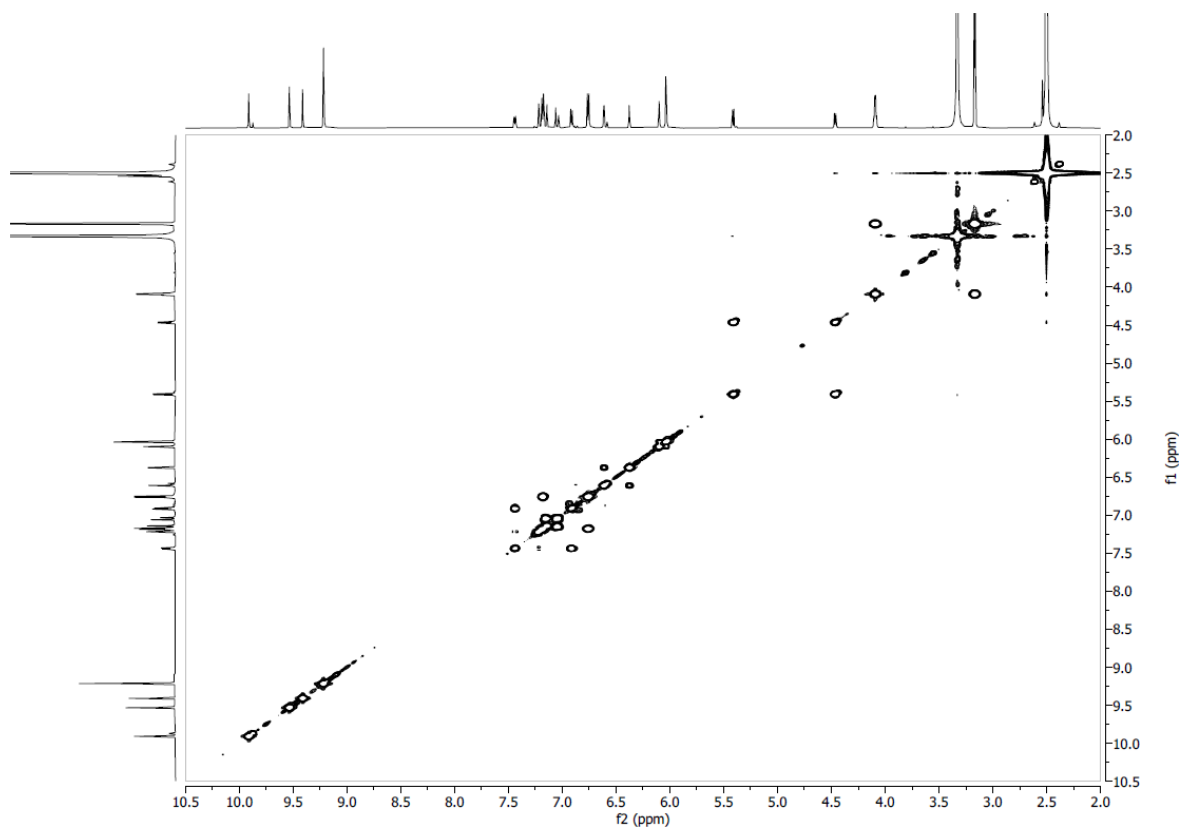

COSY NMR spectrum of compound **22** in  $\text{DMSO-}d_6$

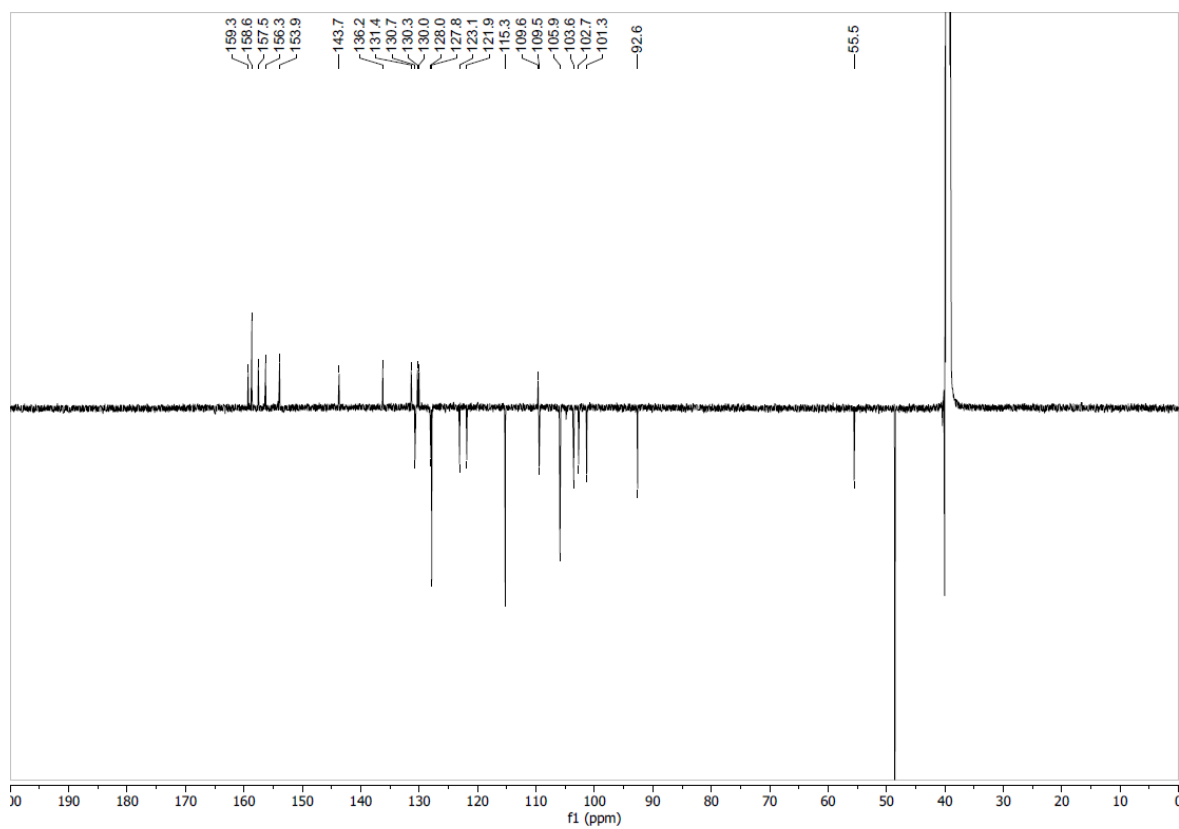

$^{13}\text{C}$ -DEPTQ NMR spectrum of compound **22** in  $\text{DMSO-}d_6$  at 151 MHz

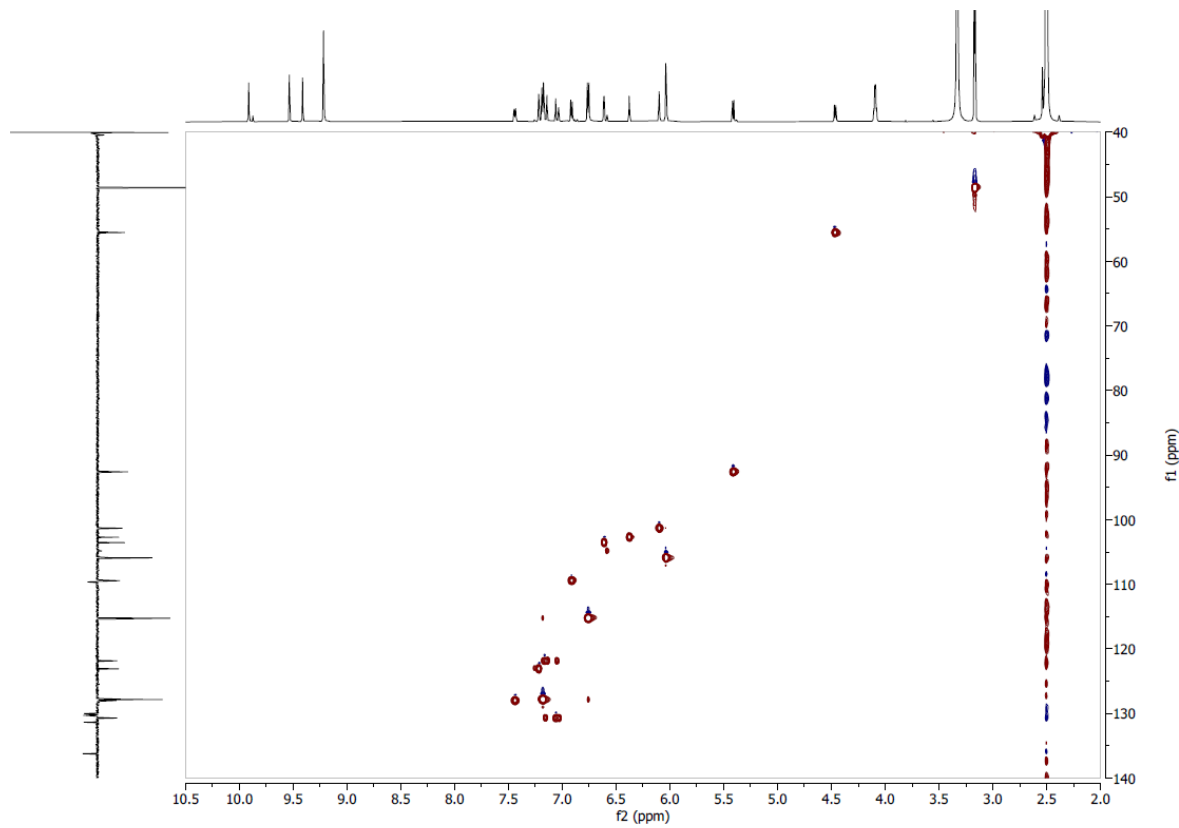

Edited HSQC NMR spectrum of compound **22** in  $\text{DMSO-}d_6$

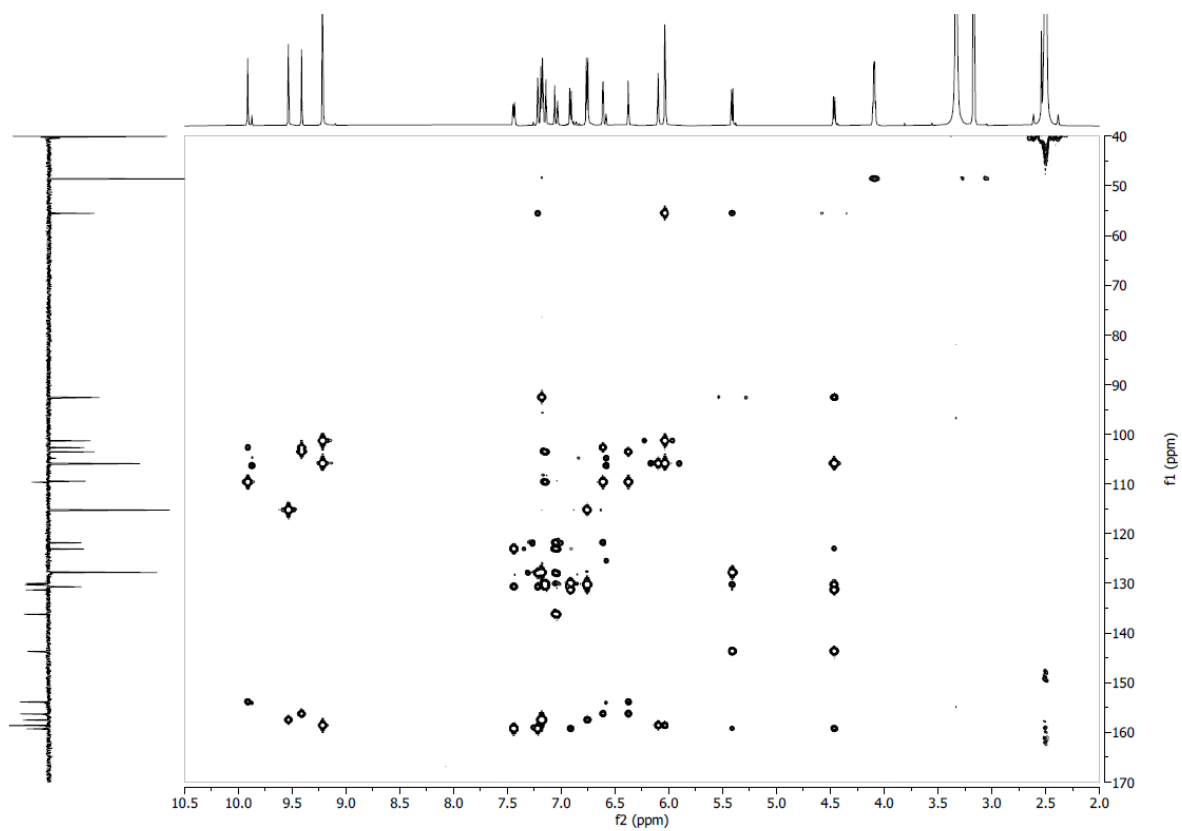

HMBC NMR spectrum of compound **22** in DMSO-*d*<sub>6</sub>

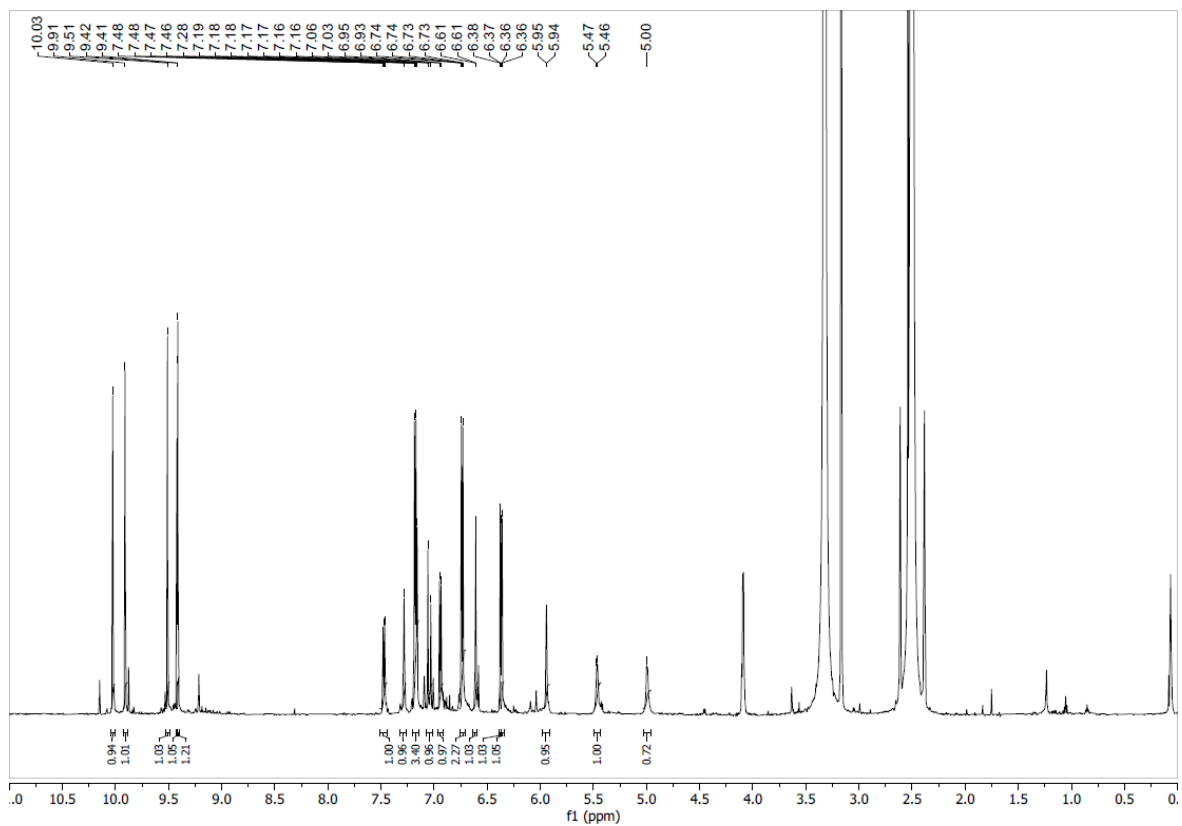

<sup>1</sup>H NMR spectrum of compound **23** in DMSO-*d*<sub>6</sub> at 600 MHz



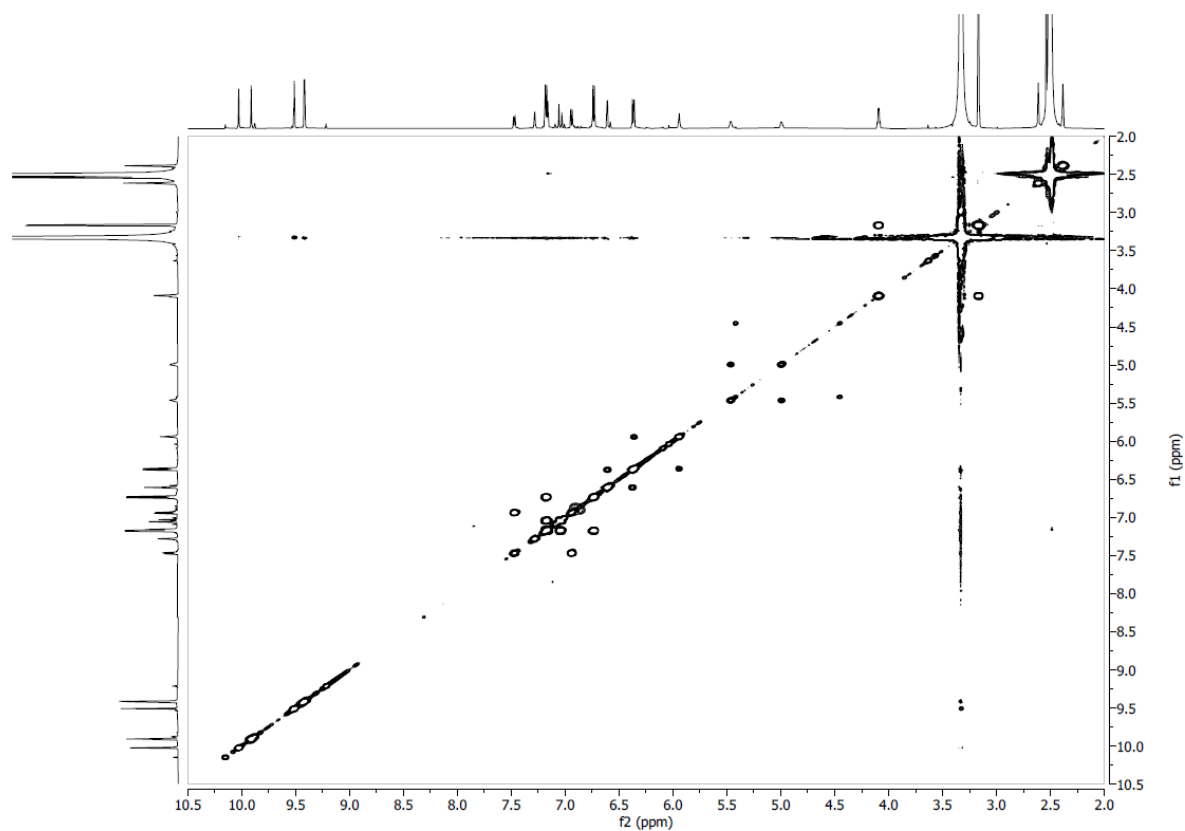

COSY NMR spectrum of compound **23** in DMSO- $d_6$

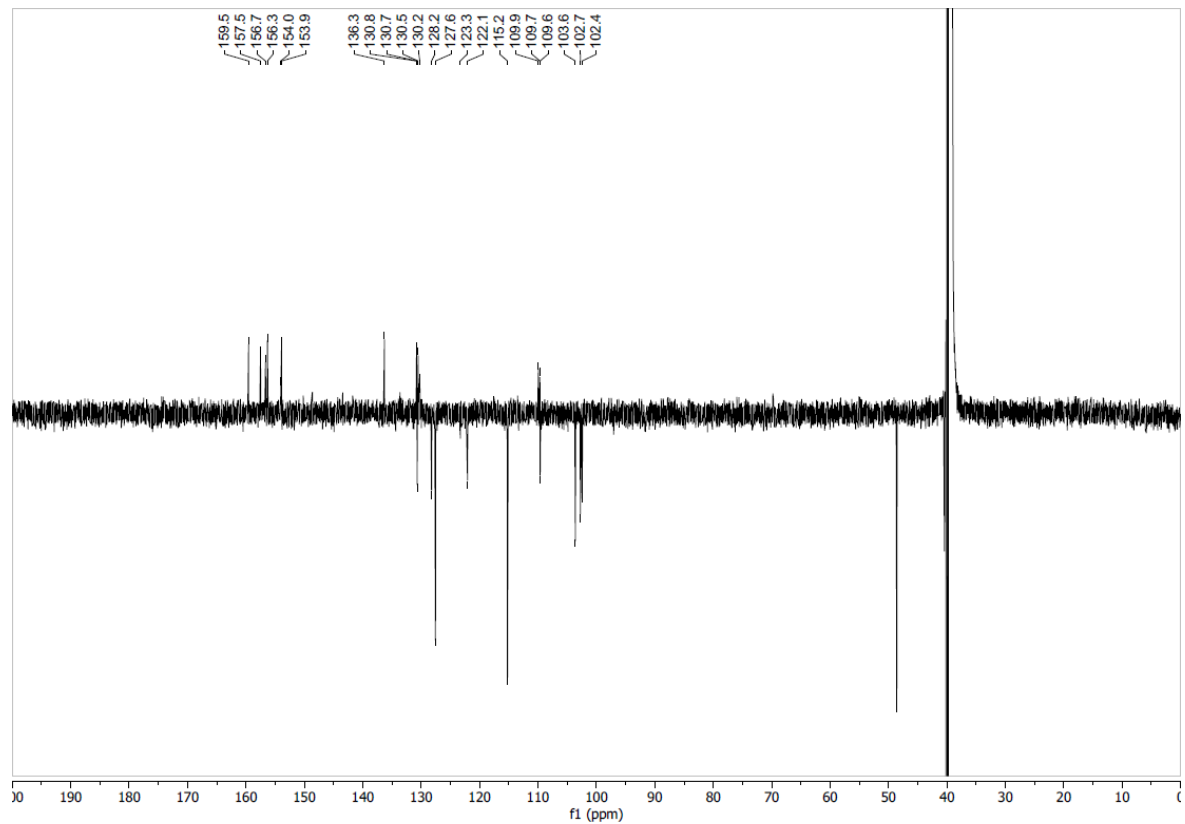

$^{13}\text{C}$ -DEPTQ NMR spectrum of compound **23** in DMSO- $d_6$  at 151 MHz

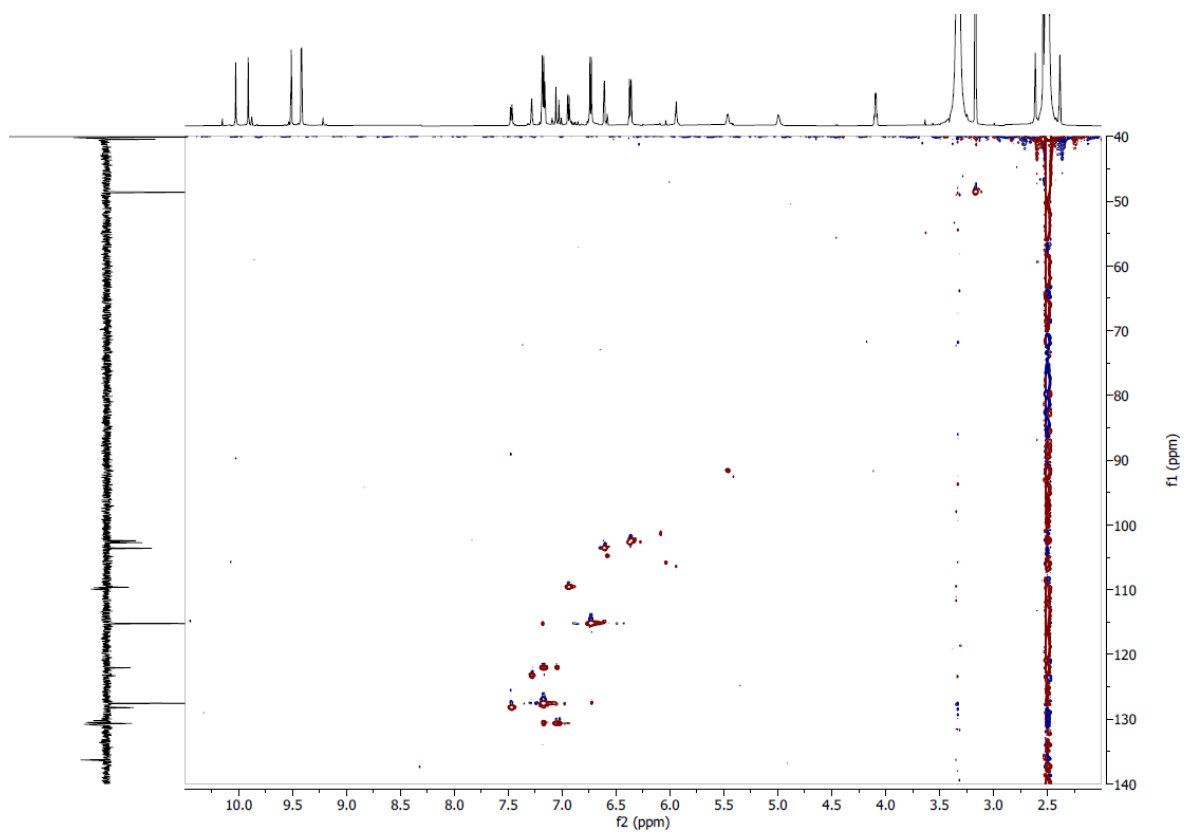

Edited HSQC NMR spectrum of compound **23** in DMSO-*d*<sub>6</sub>

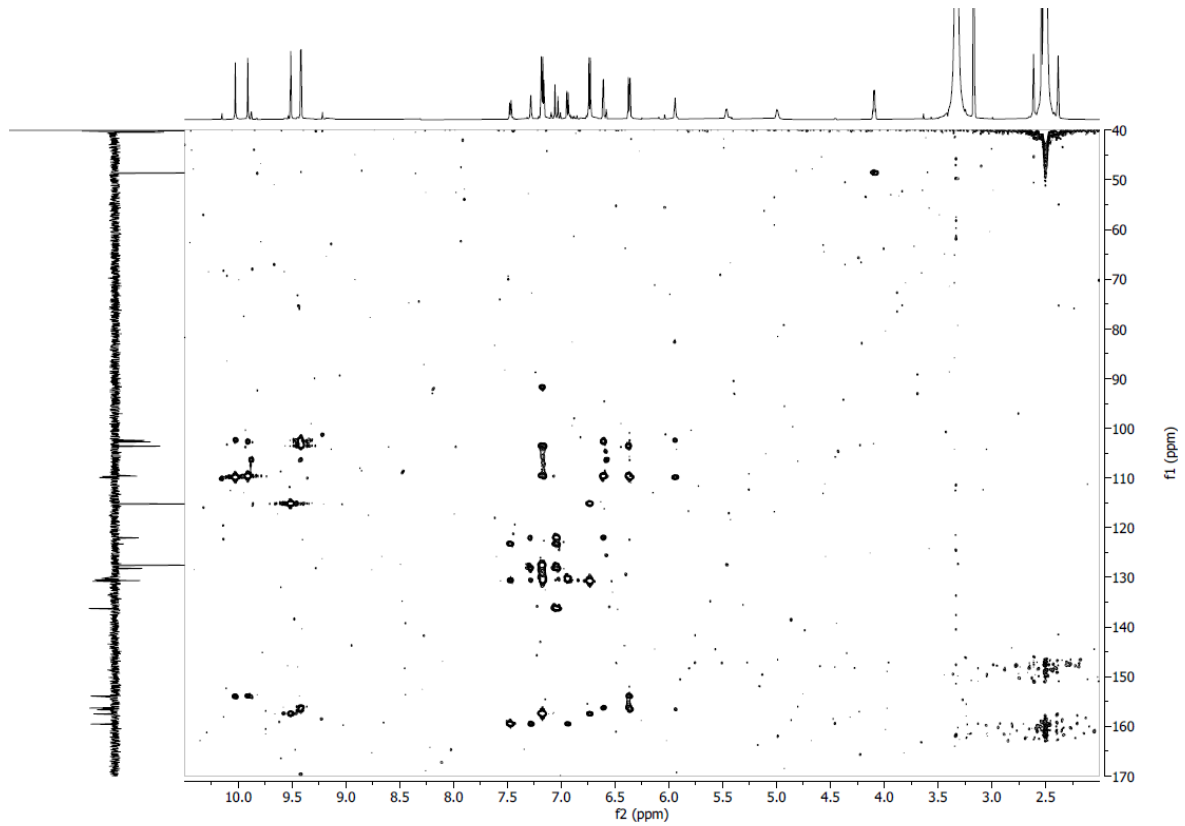

HMBC NMR spectrum of compound **23** in DMSO-*d*<sub>6</sub>

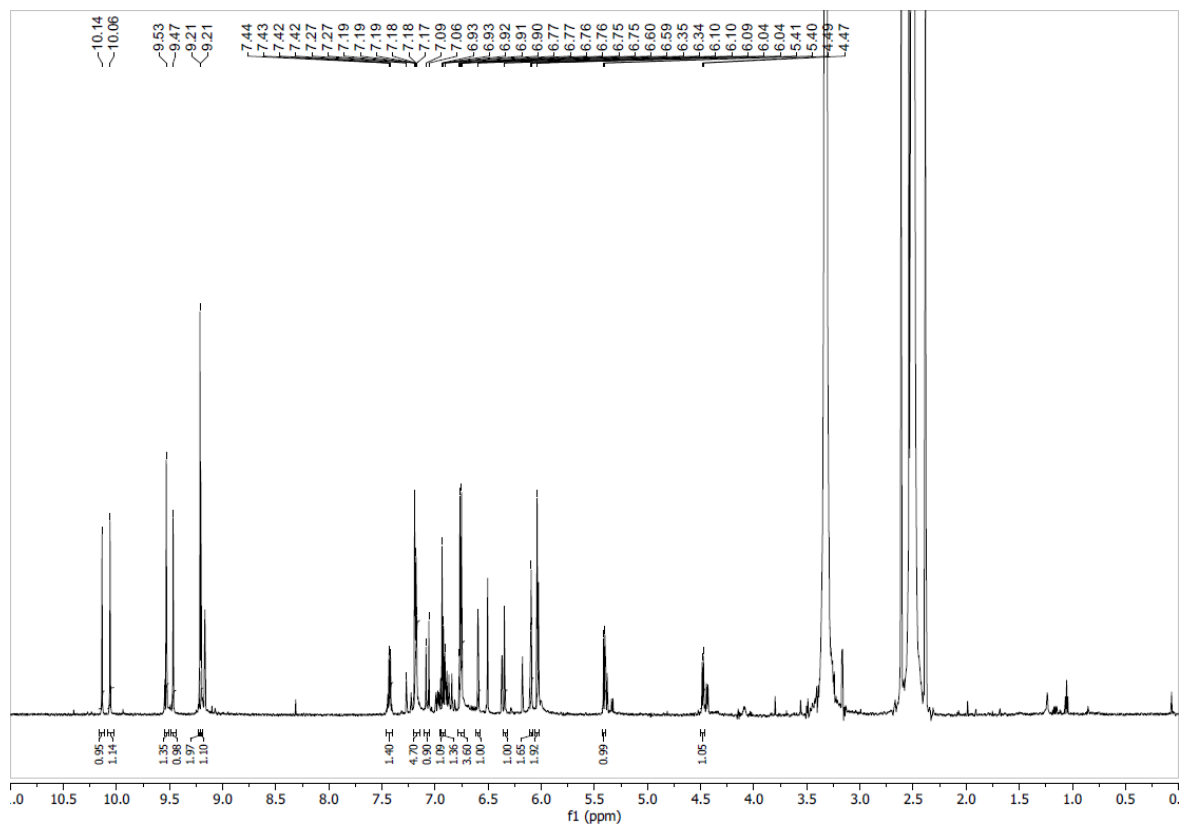

$^1\text{H}$  NMR spectrum of compound **24** in  $\text{DMSO-}d_6$  at 600 MHz

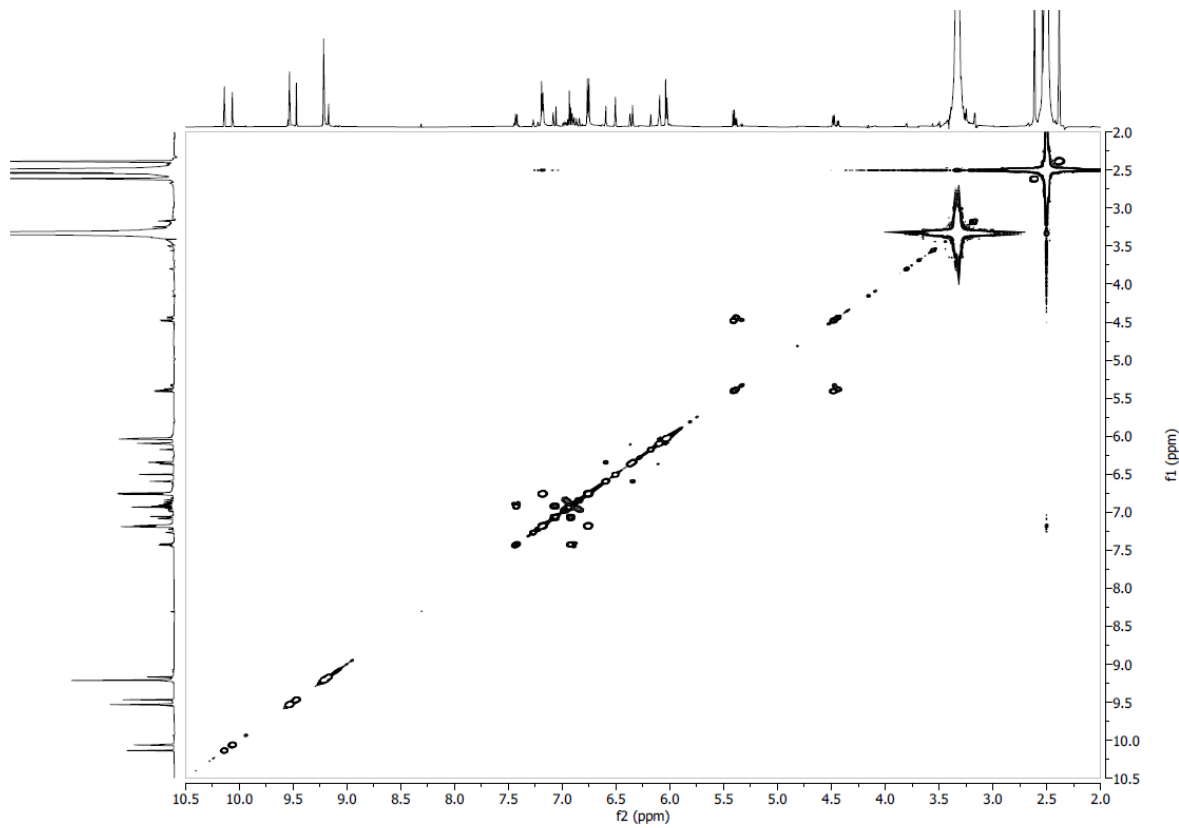

COSY NMR spectrum of compound **24** in  $\text{DMSO-}d_6$

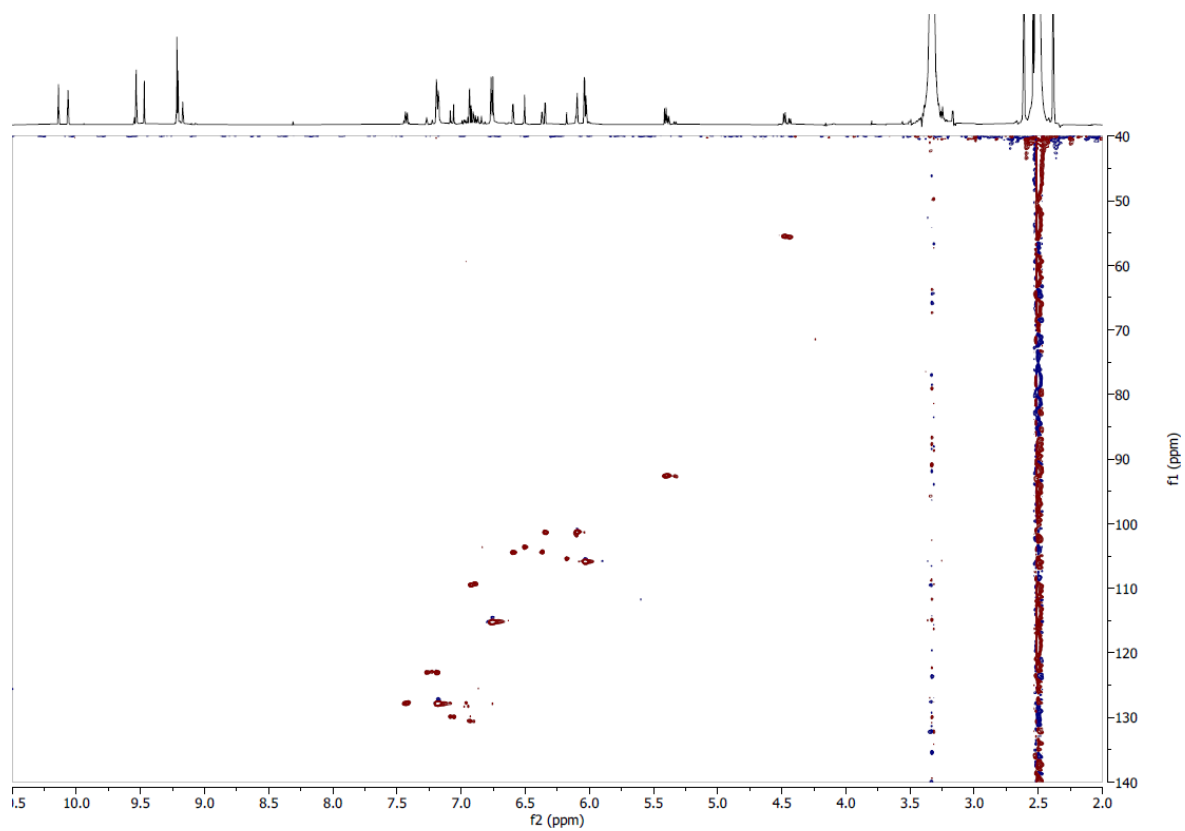

Edited HSQC NMR spectrum of compound **24** in DMSO-*d*<sub>6</sub>

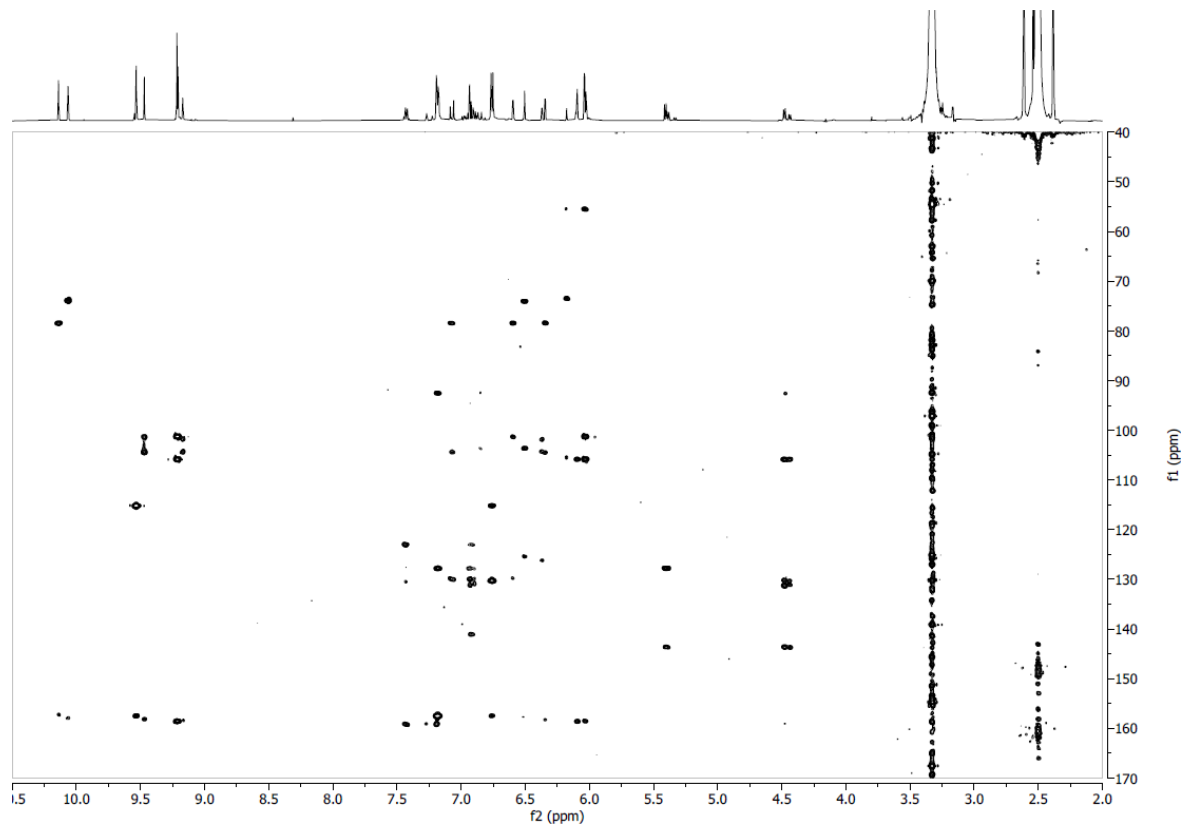

HMBC NMR spectrum of compound **24** in DMSO-*d*<sub>6</sub>

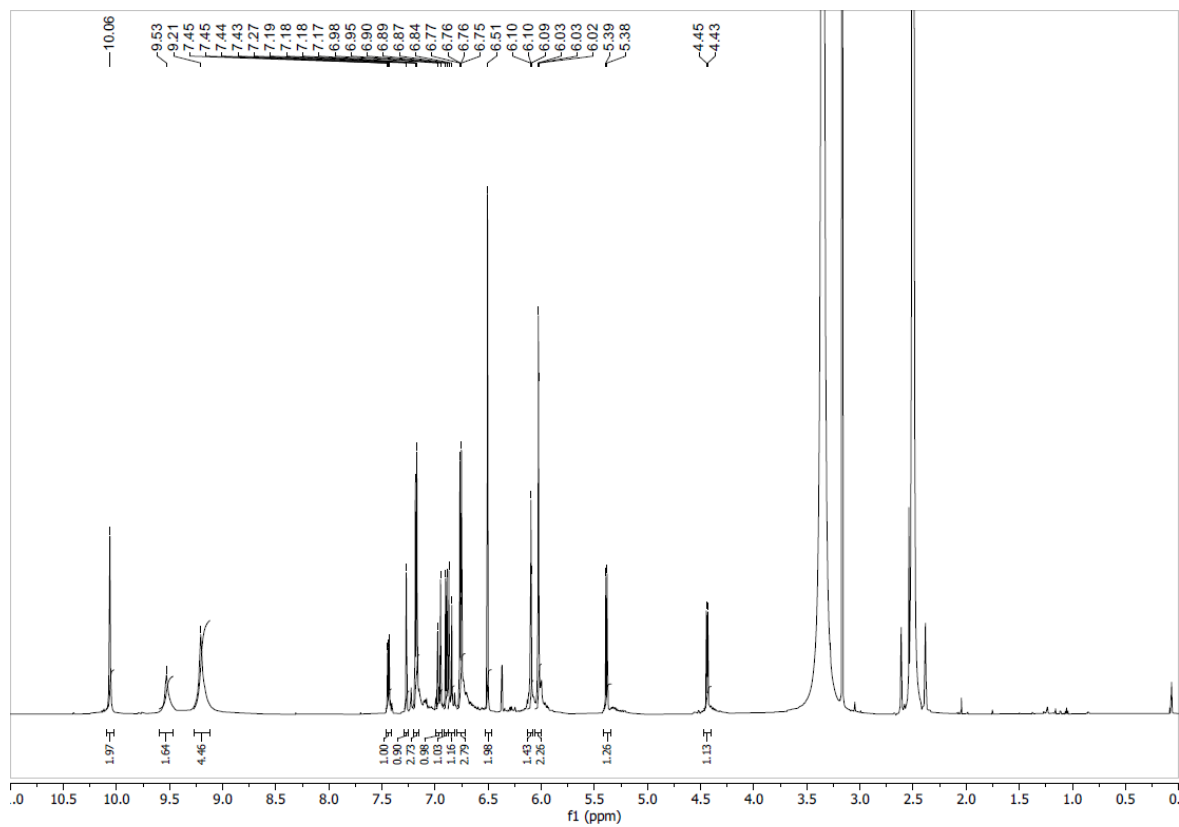

$^1\text{H}$  NMR spectrum of compound **25** in  $\text{DMSO-}d_6$  at 600 MHz

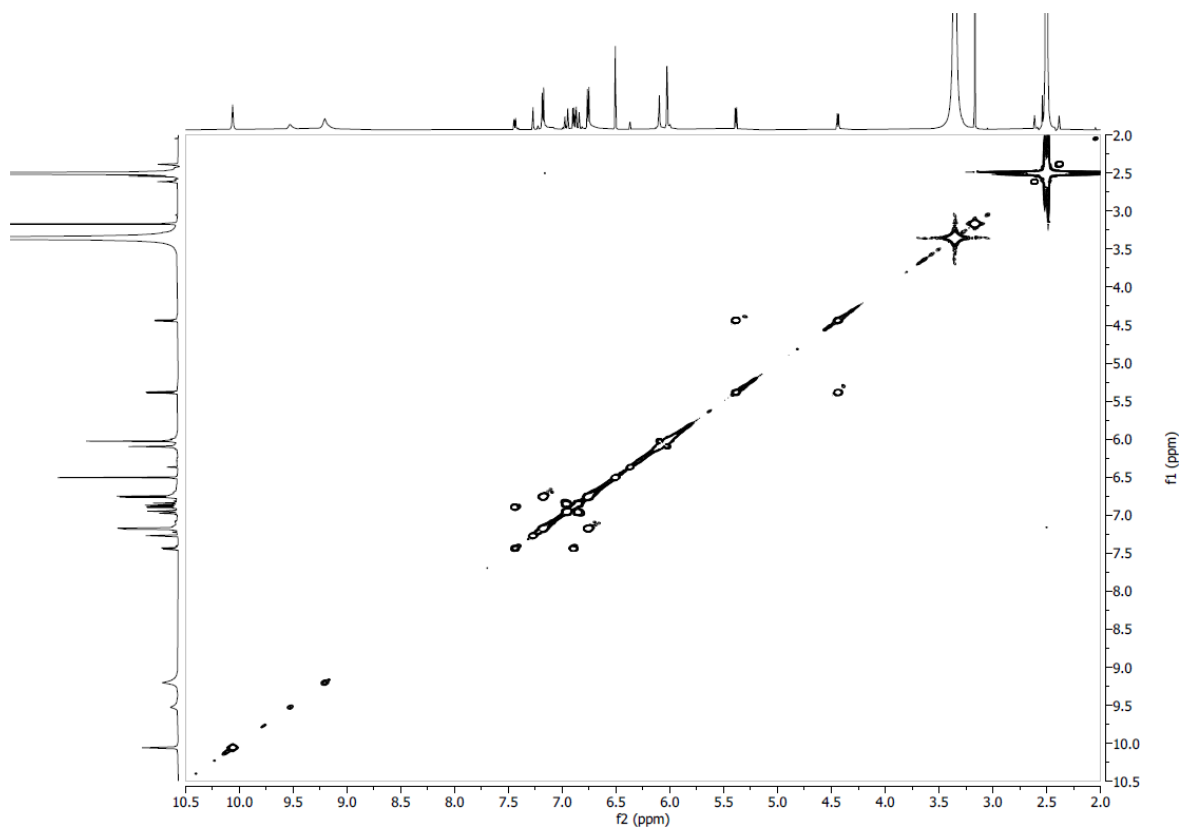

COSY NMR spectrum of compound **25** in  $\text{DMSO-}d_6$

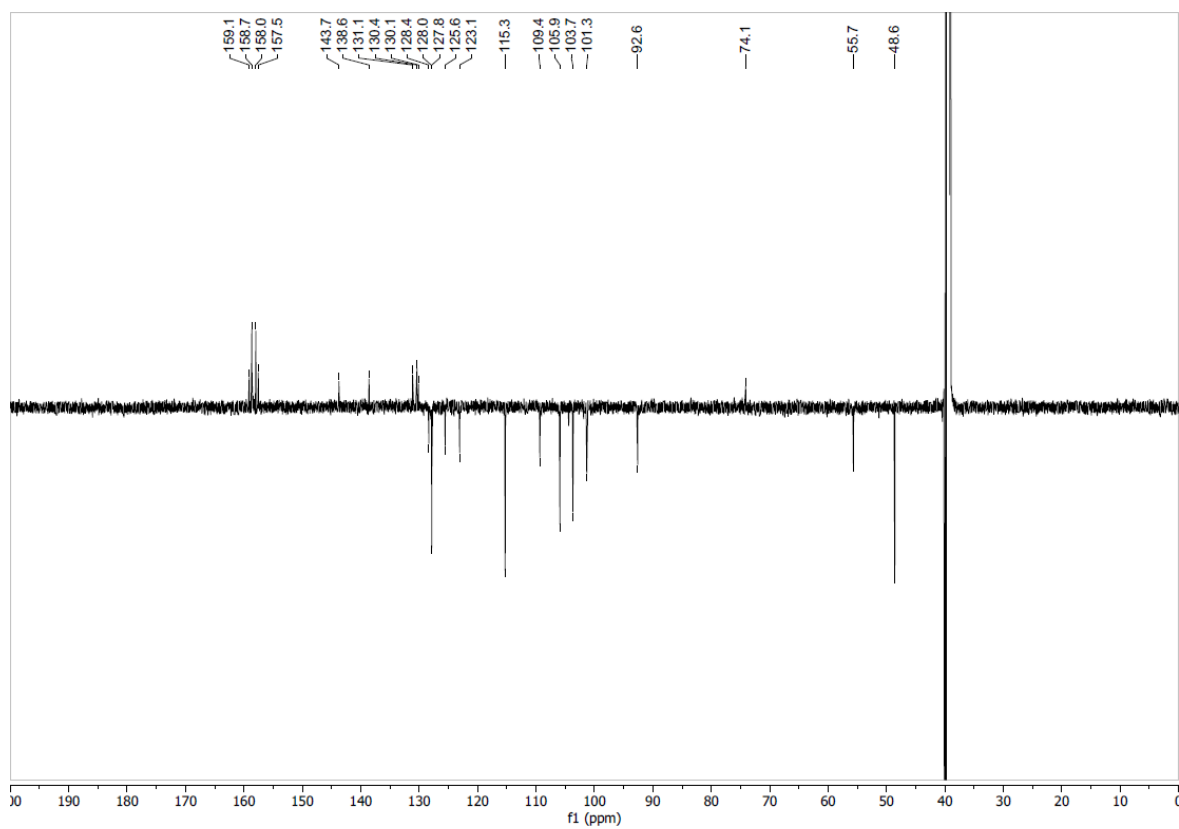

$^{13}\text{C}$ -DEPTQ NMR spectrum of compound **25** in  $\text{DMSO-}d_6$  at 151 MHz

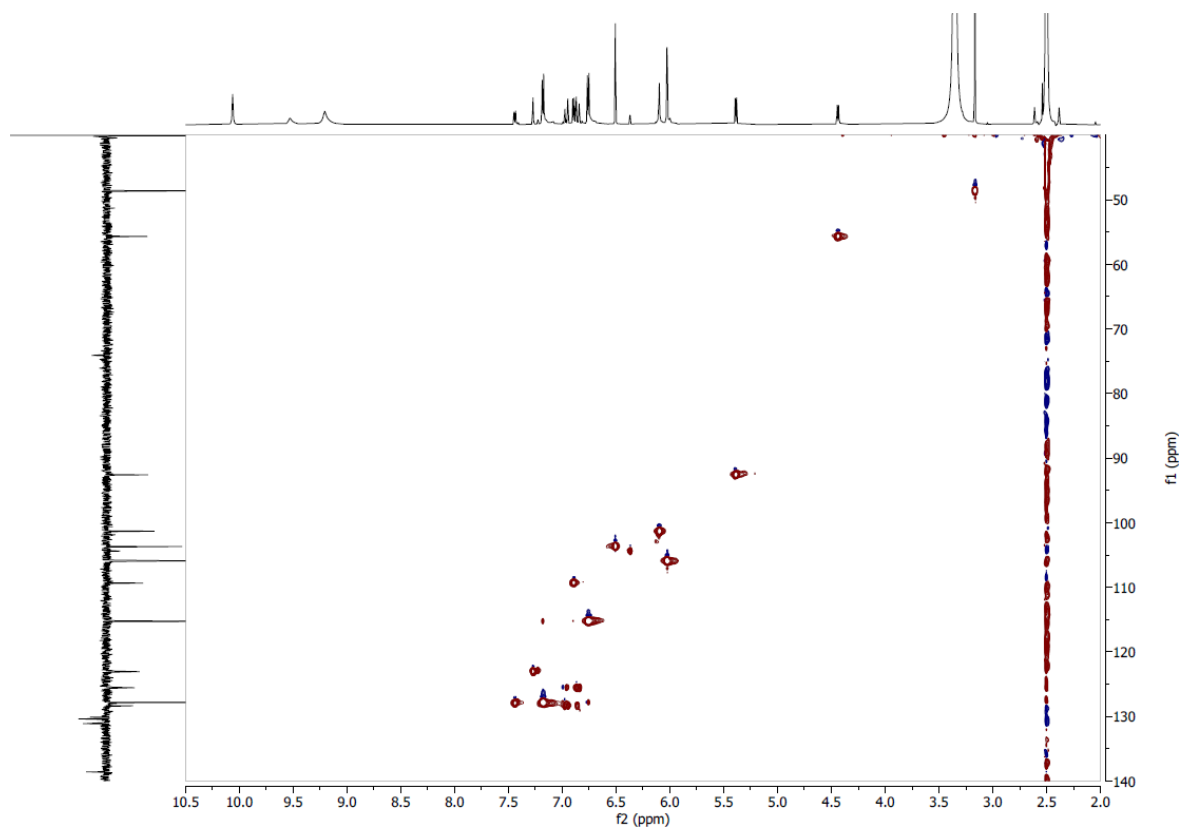

Edited HSQC NMR spectrum of compound **25** in  $\text{DMSO-}d_6$

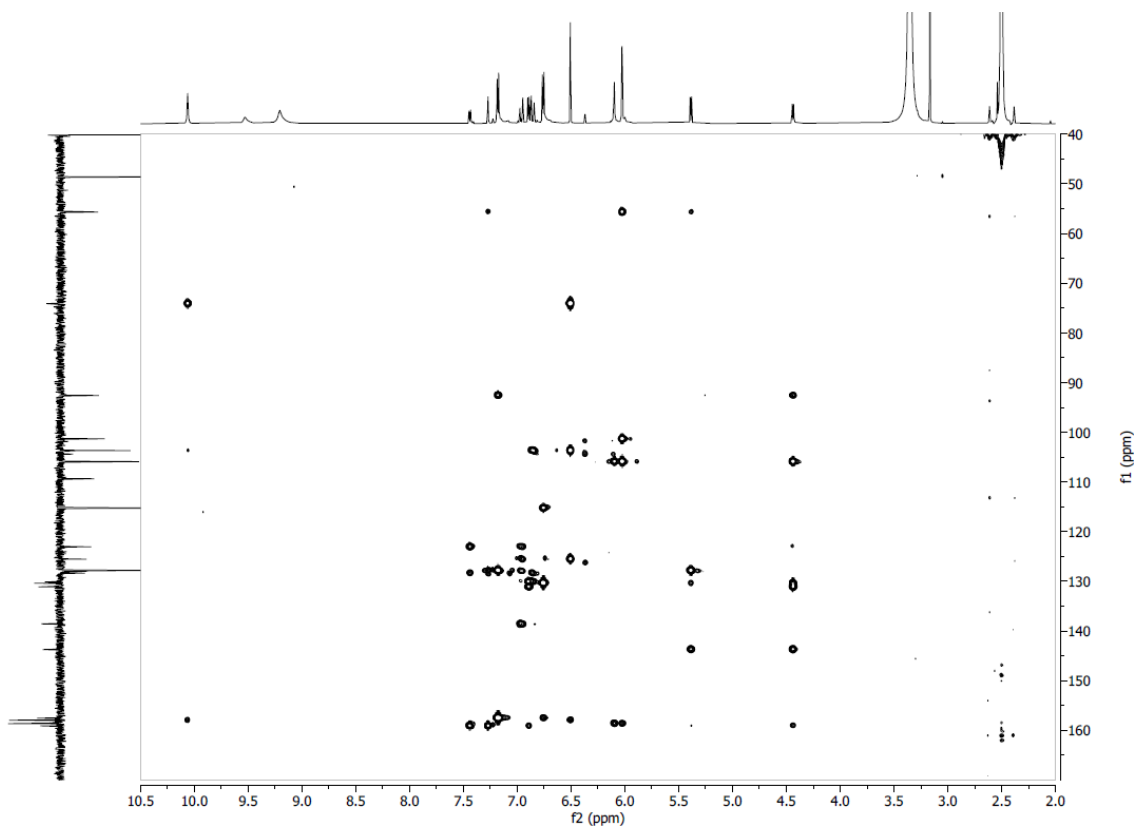

HMBC NMR spectrum of compound **25** in DMSO- $d_6$

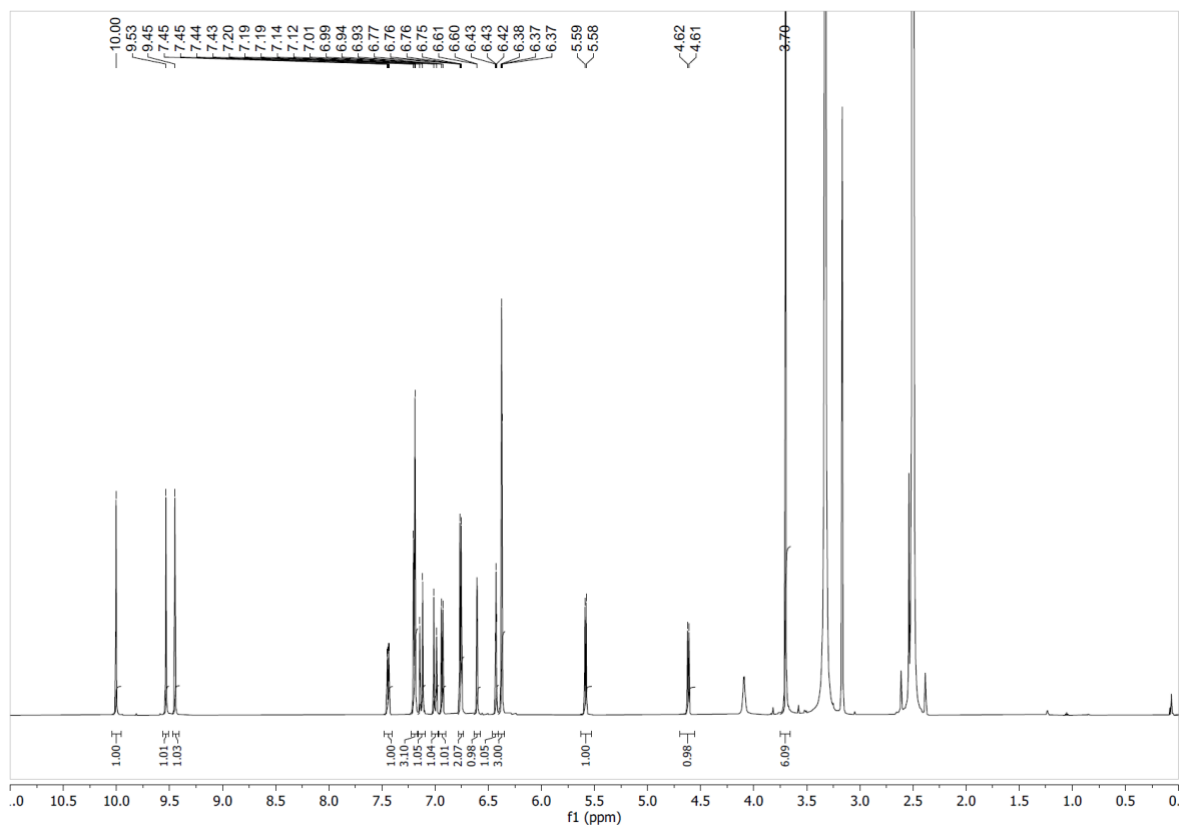

$^1\text{H}$  NMR spectrum of compound **26** in DMSO- $d_6$  at 600 MHz

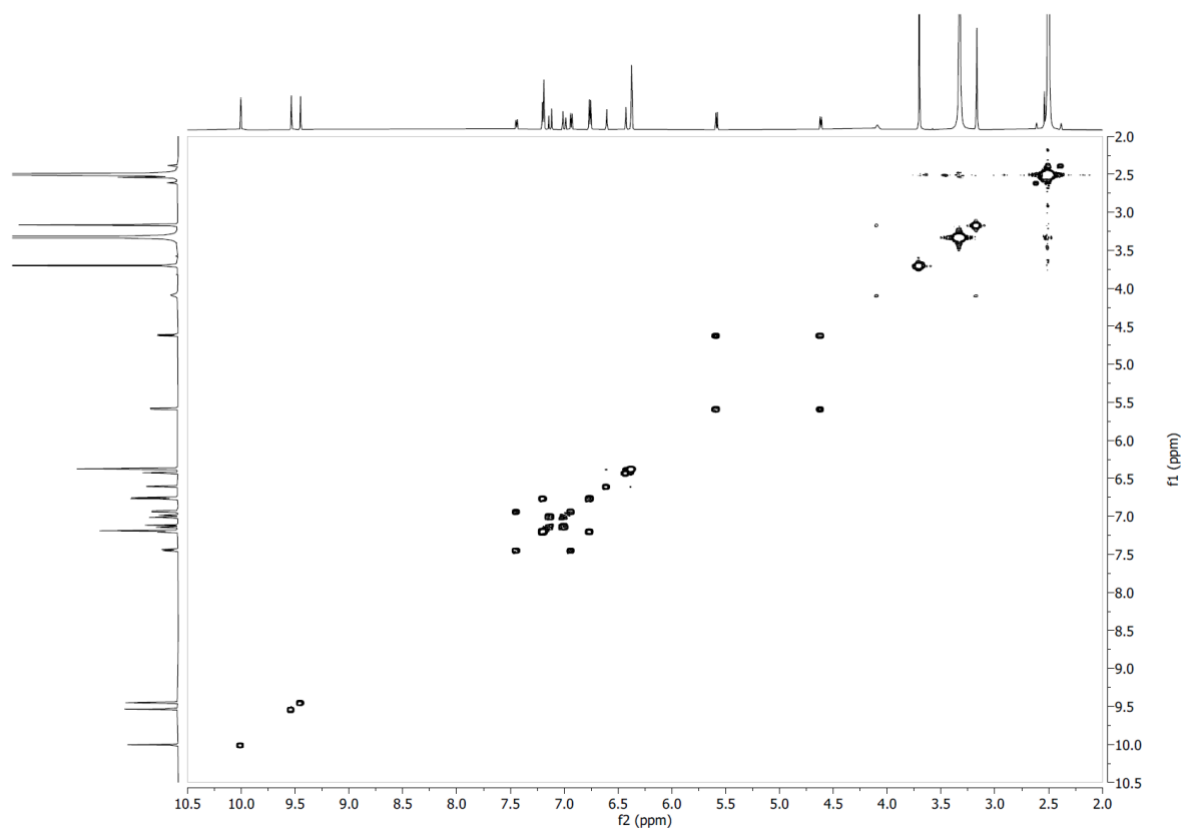

COSY NMR spectrum of compound **26** in DMSO-*d*<sub>6</sub>

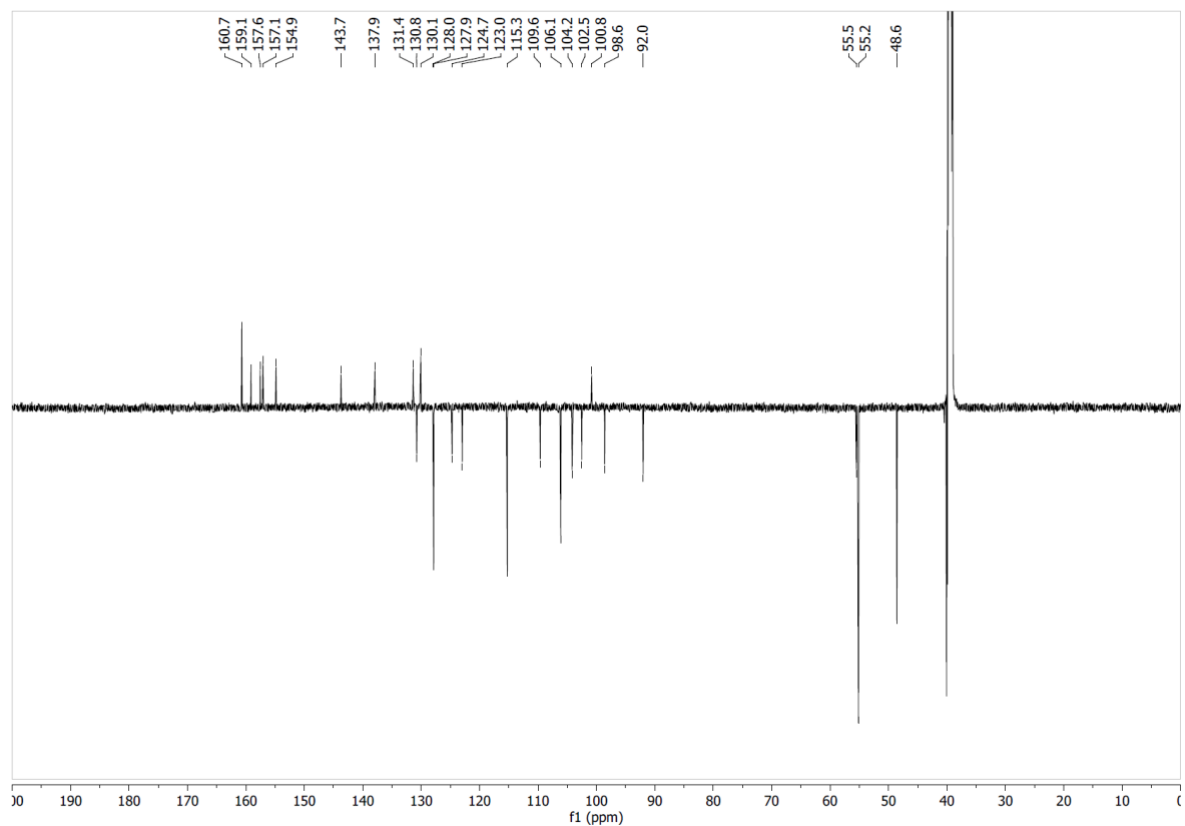

<sup>13</sup>C-DEPTQ NMR spectrum of compound **26** in DMSO-*d*<sub>6</sub> at 151 MHz



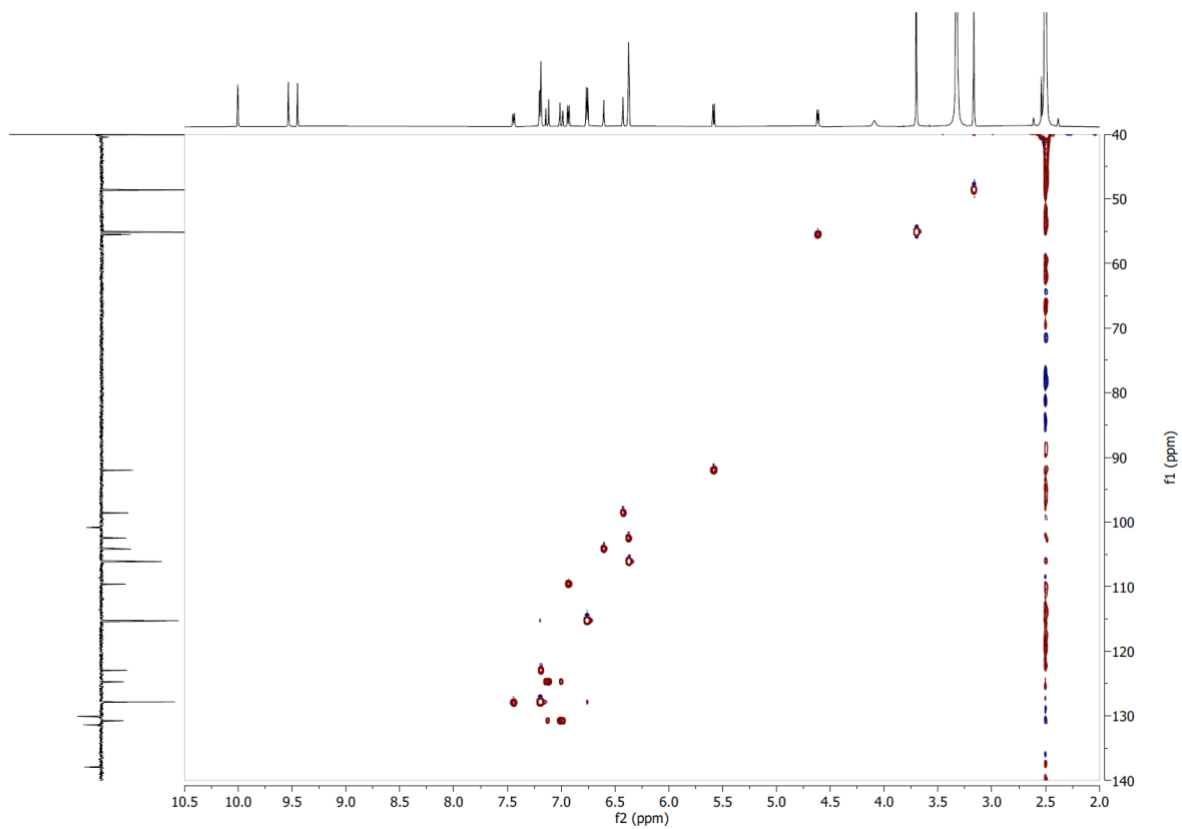

Edited HSQC NMR spectrum of compound **26** in DMSO-*d*<sub>6</sub>

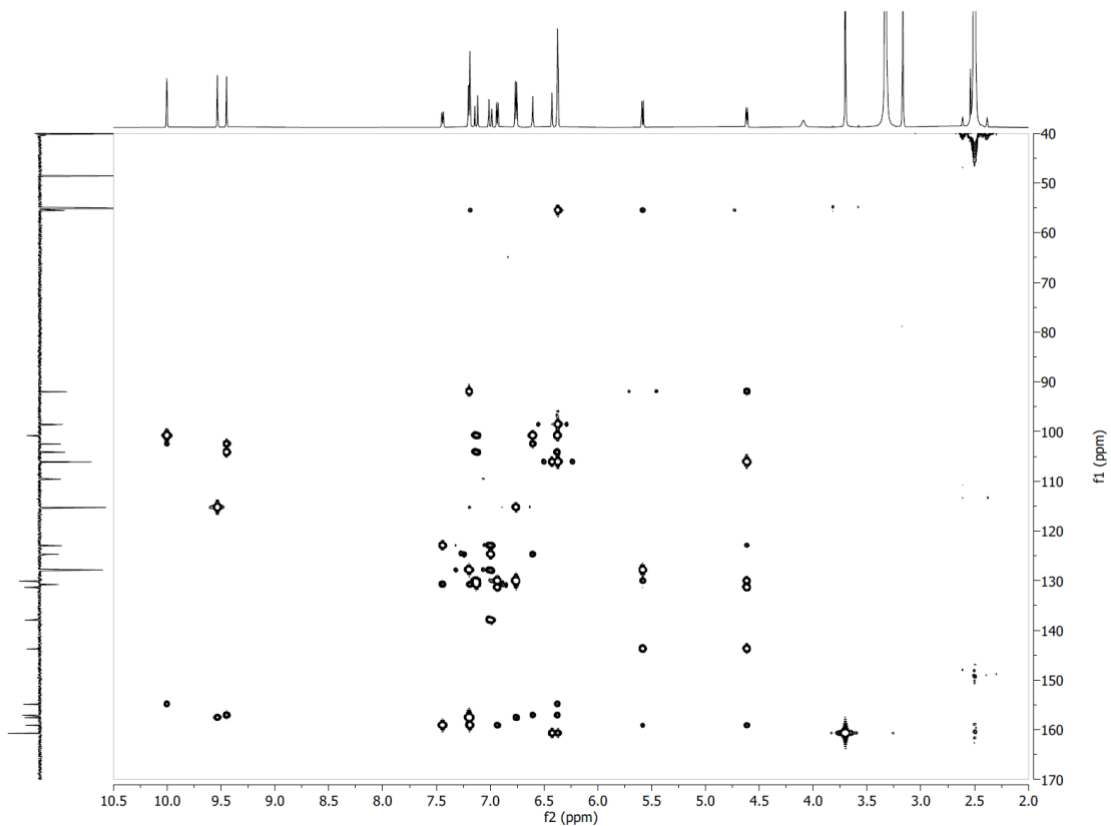

HMBC NMR spectrum of compound **26** in DMSO-*d*<sub>6</sub>

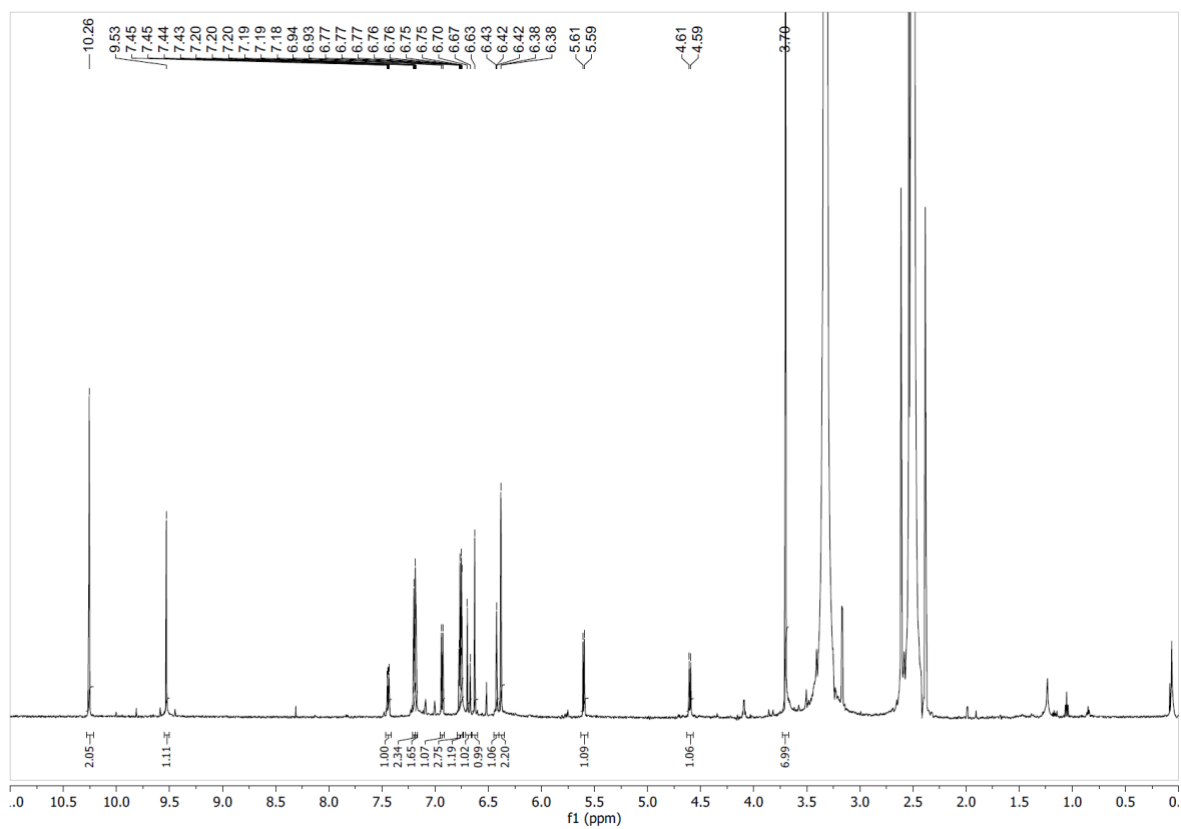

$^1\text{H}$  NMR spectrum of compound **27** in  $\text{DMSO-}d_6$  at 600 MHz

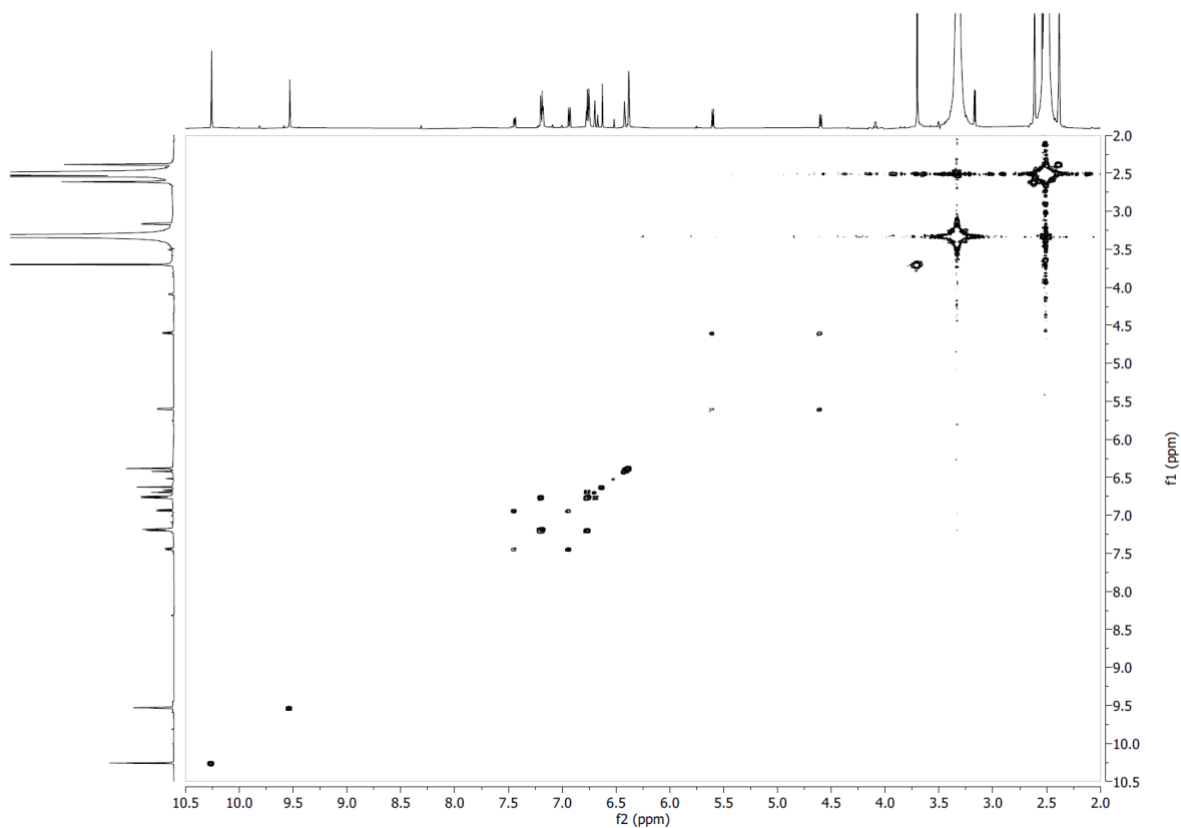

COSY NMR spectrum of compound **27** in  $\text{DMSO-}d_6$

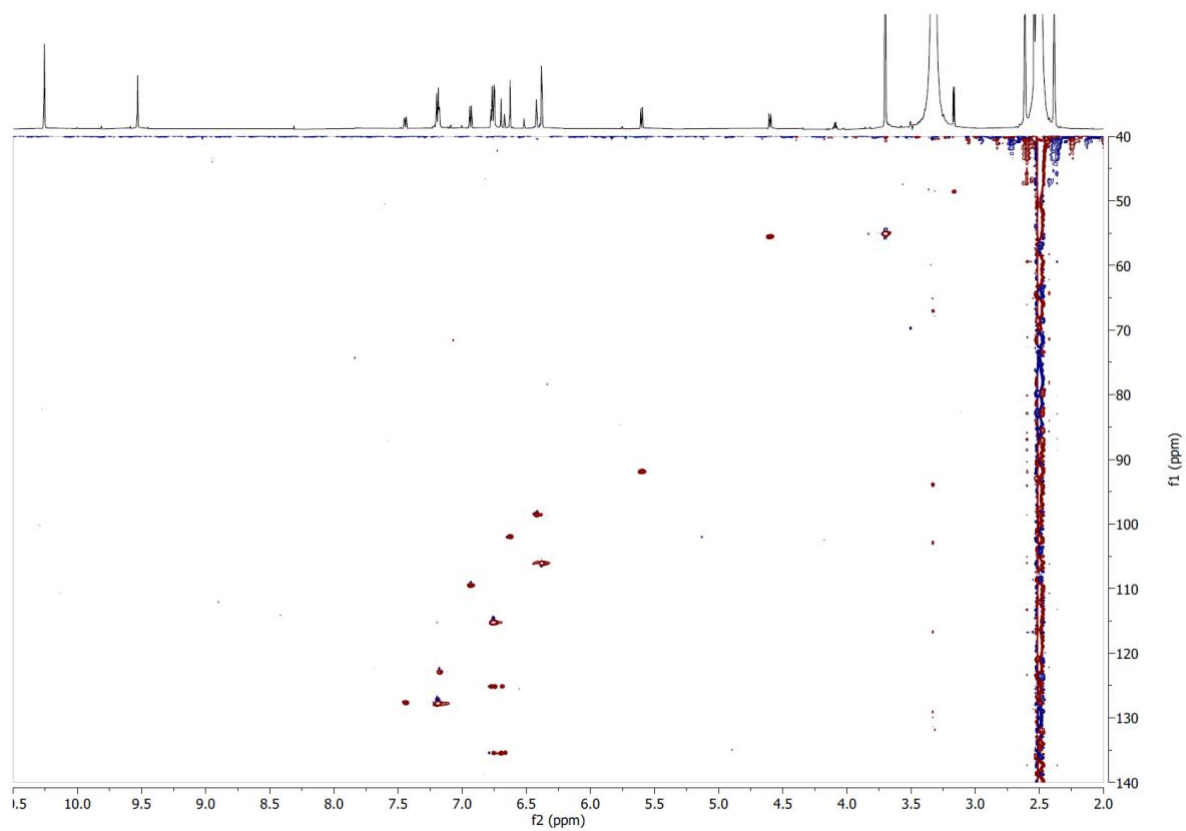

Edited HSQC NMR spectrum of compound **27** in DMSO-*d*<sub>6</sub>

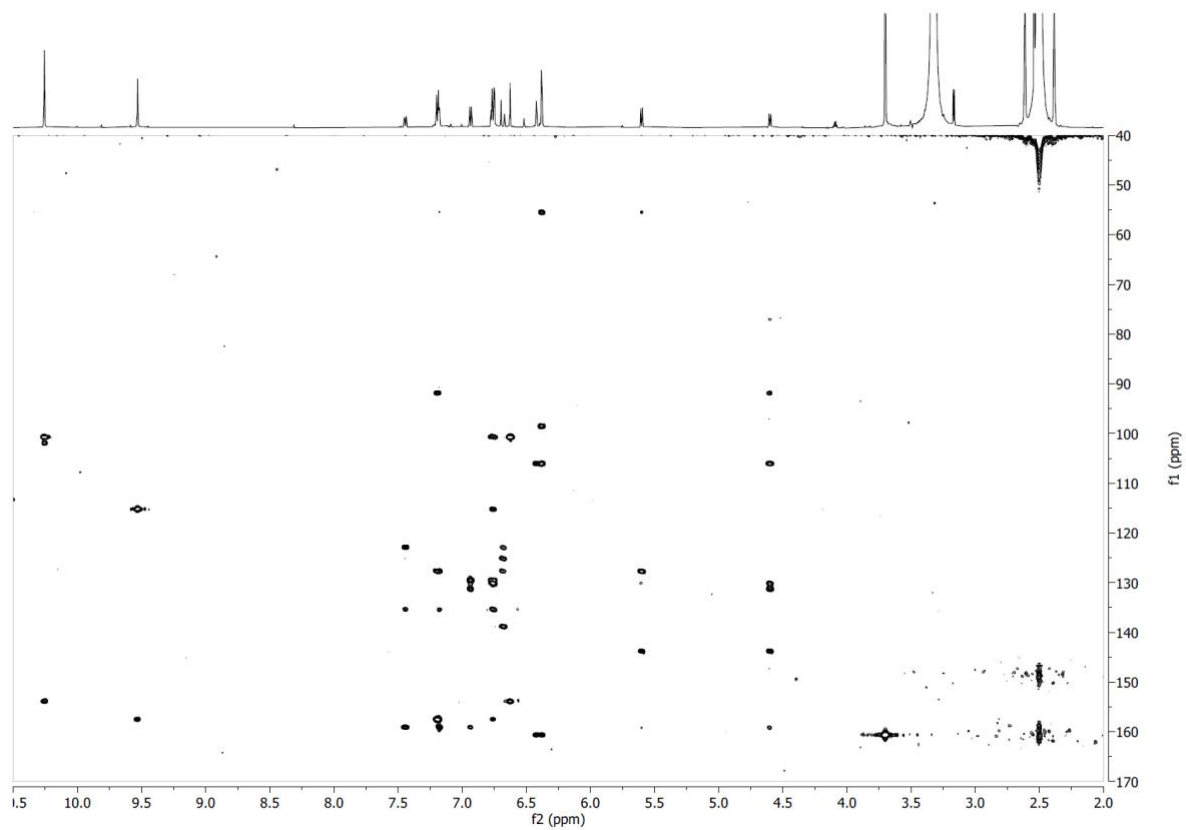

HMBC NMR spectrum of compound **27** in DMSO-*d*<sub>6</sub>

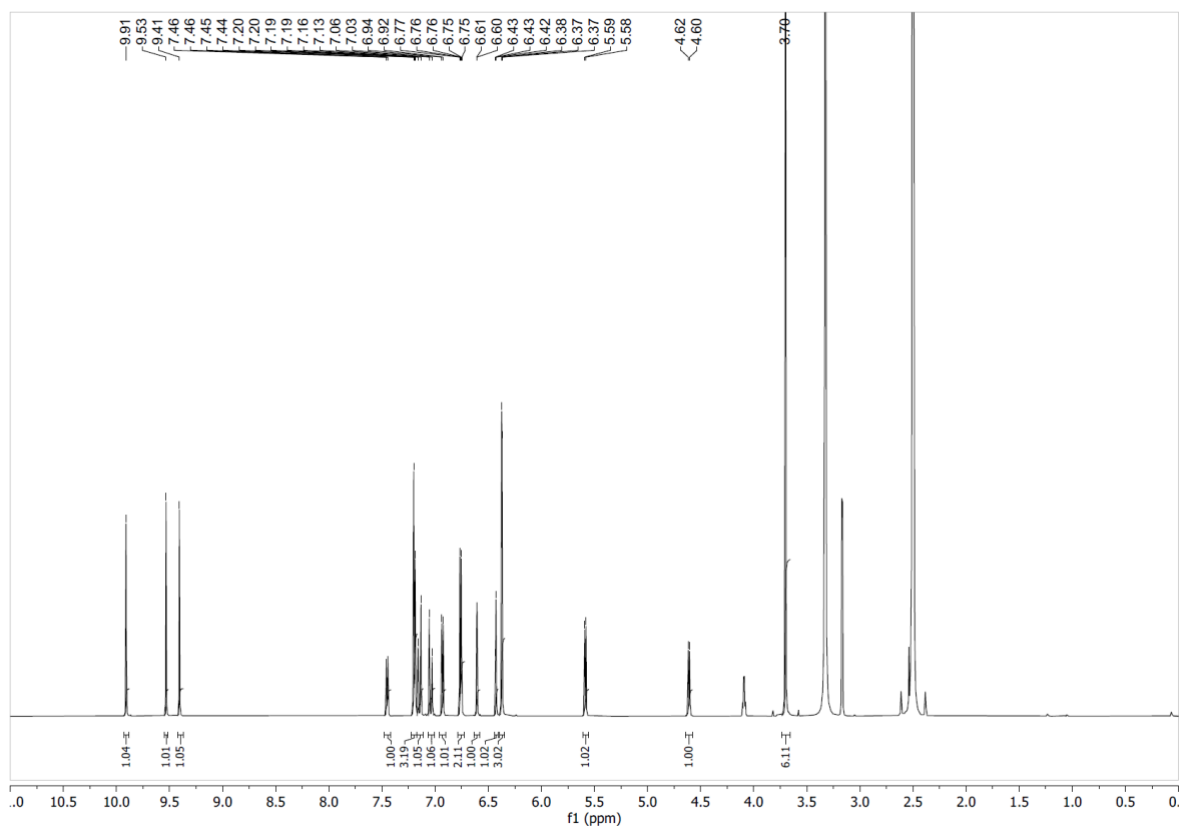

$^1\text{H}$  NMR spectrum of compound **28** in  $\text{DMSO-}d_6$  at 600 MHz

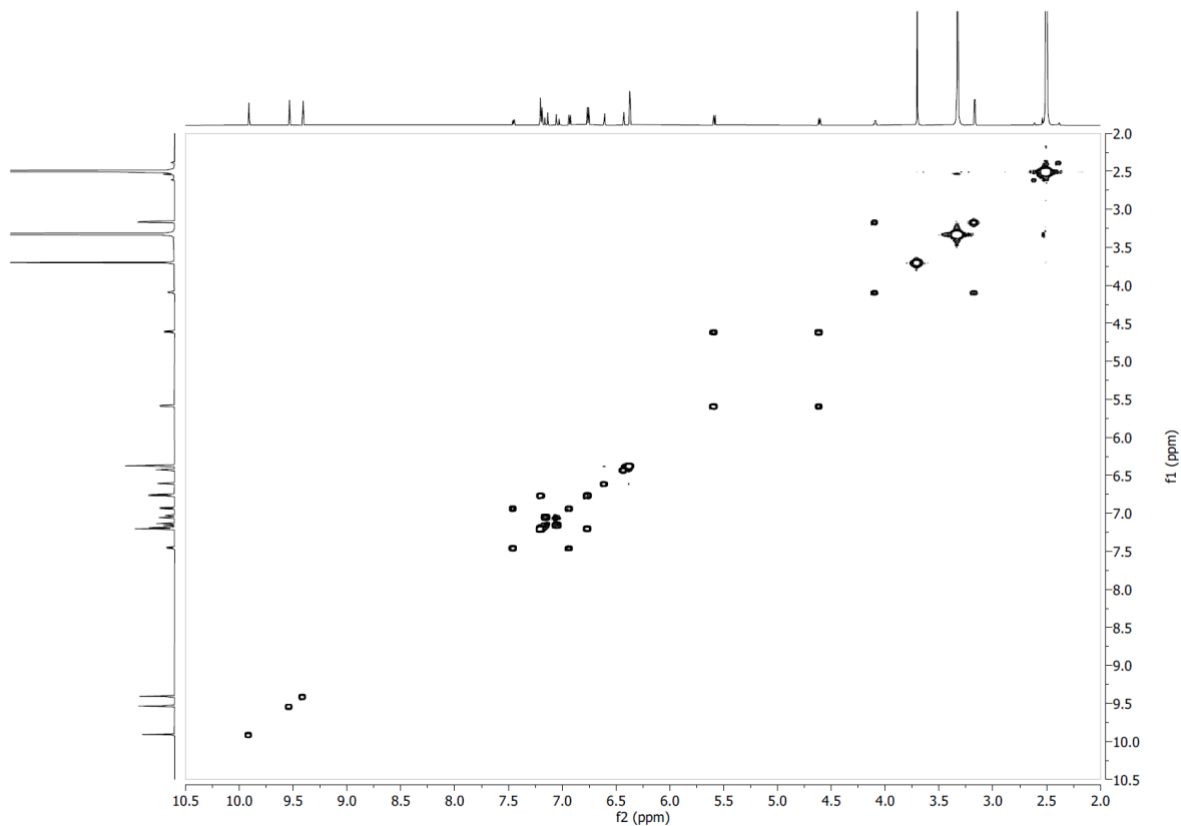

COSY NMR spectrum of compound **28** in  $\text{DMSO-}d_6$

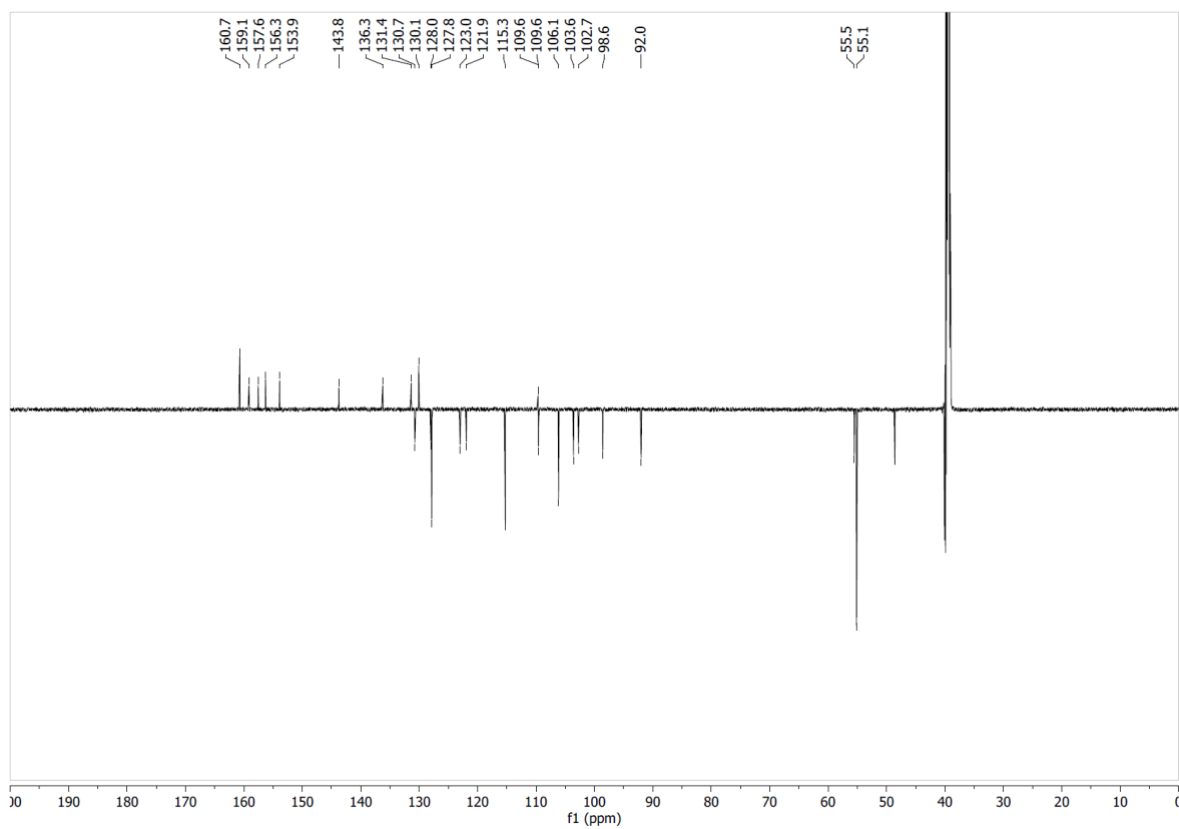

$^{13}\text{C}$ -DEPTQ NMR spectrum of compound **28** in  $\text{DMSO-}d_6$  at 151 MHz

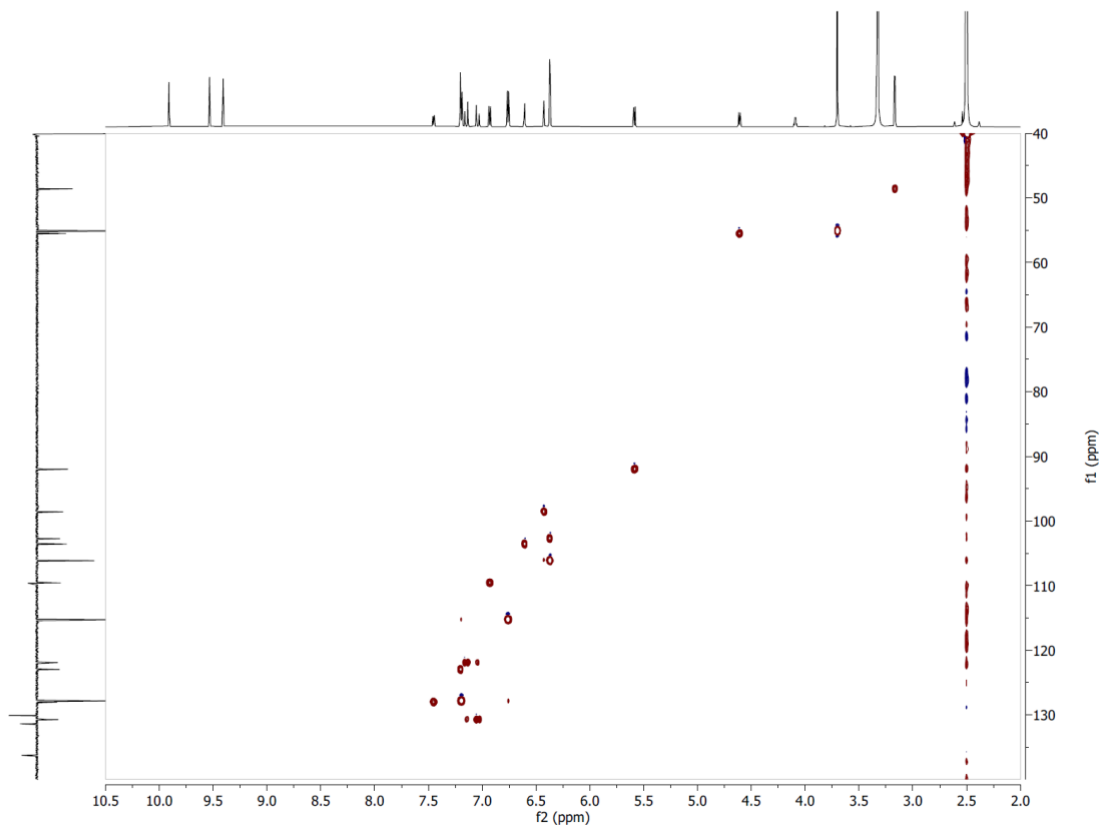

Edited HSQC NMR spectrum of compound **28** in  $\text{DMSO-}d_6$

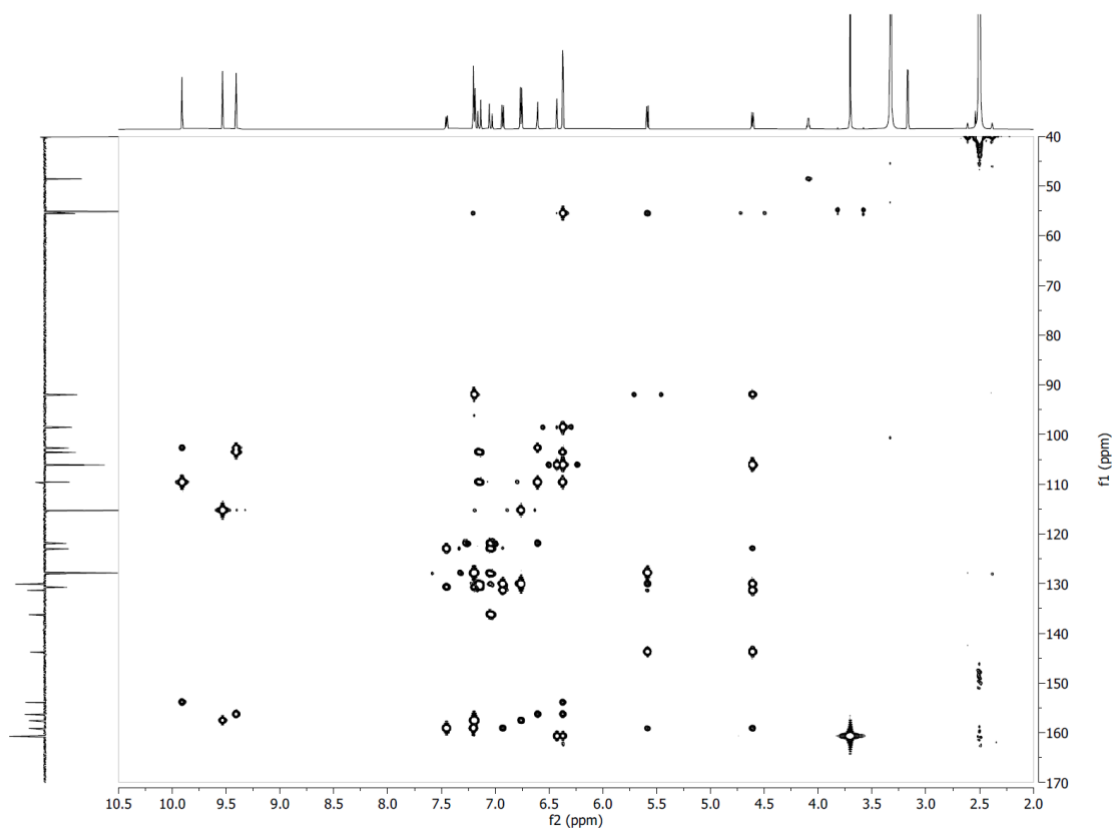

HMBC NMR spectrum of compound **28** in DMSO- $d_6$

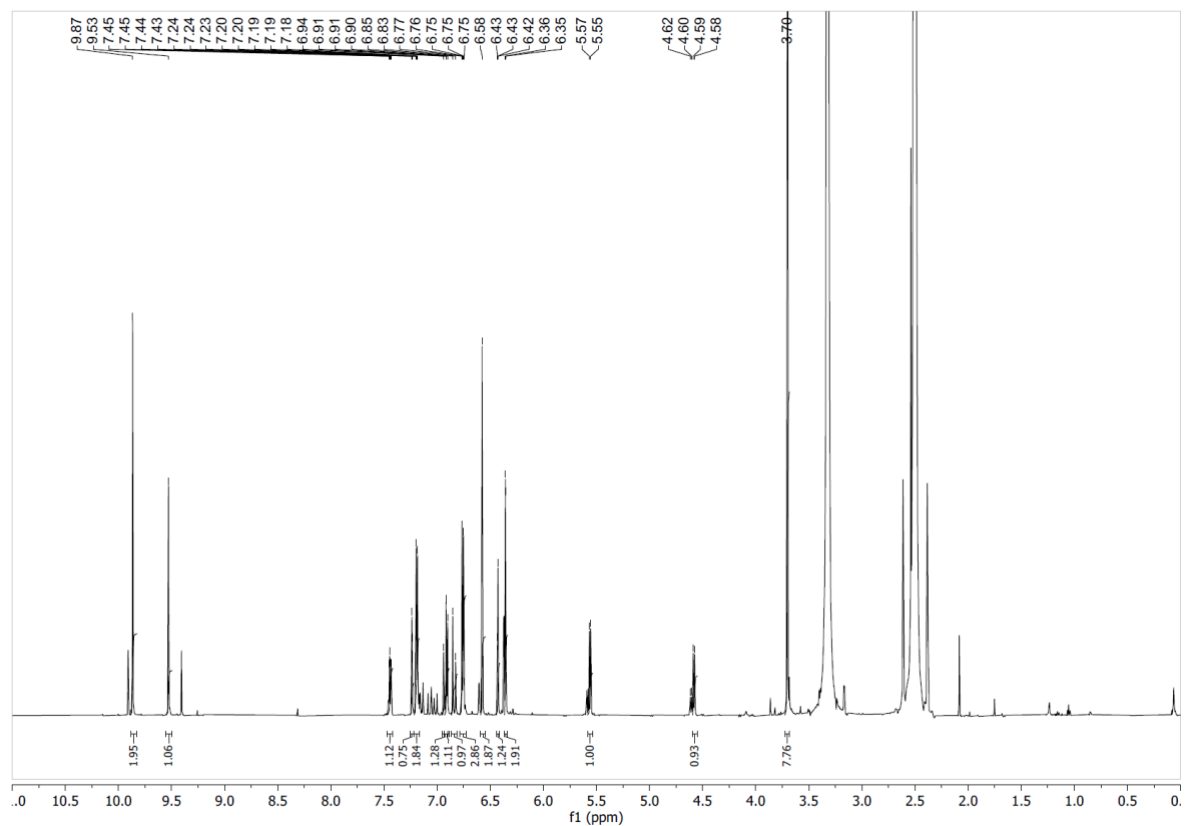

$^1\text{H}$  NMR spectrum of compound **29** in DMSO- $d_6$  at 600 MHz

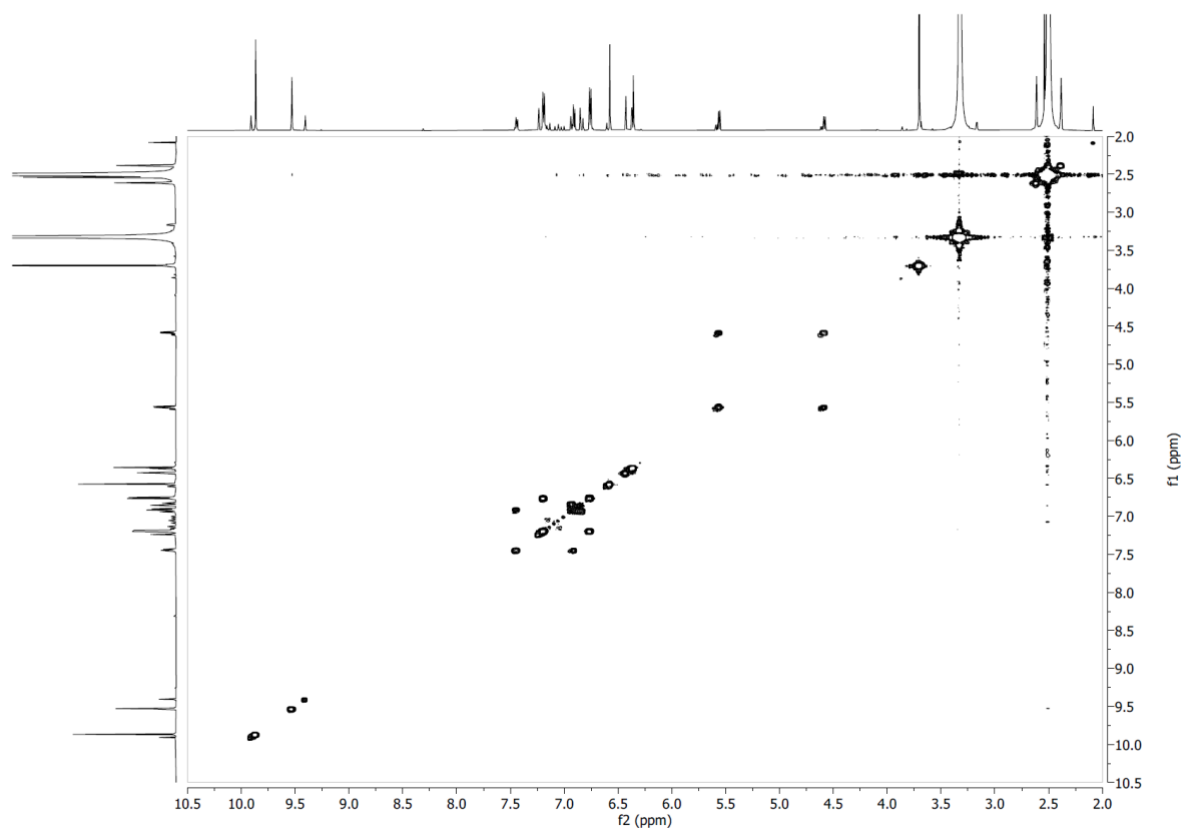

COSY NMR spectrum of compound **29** in DMSO-*d*<sub>6</sub>

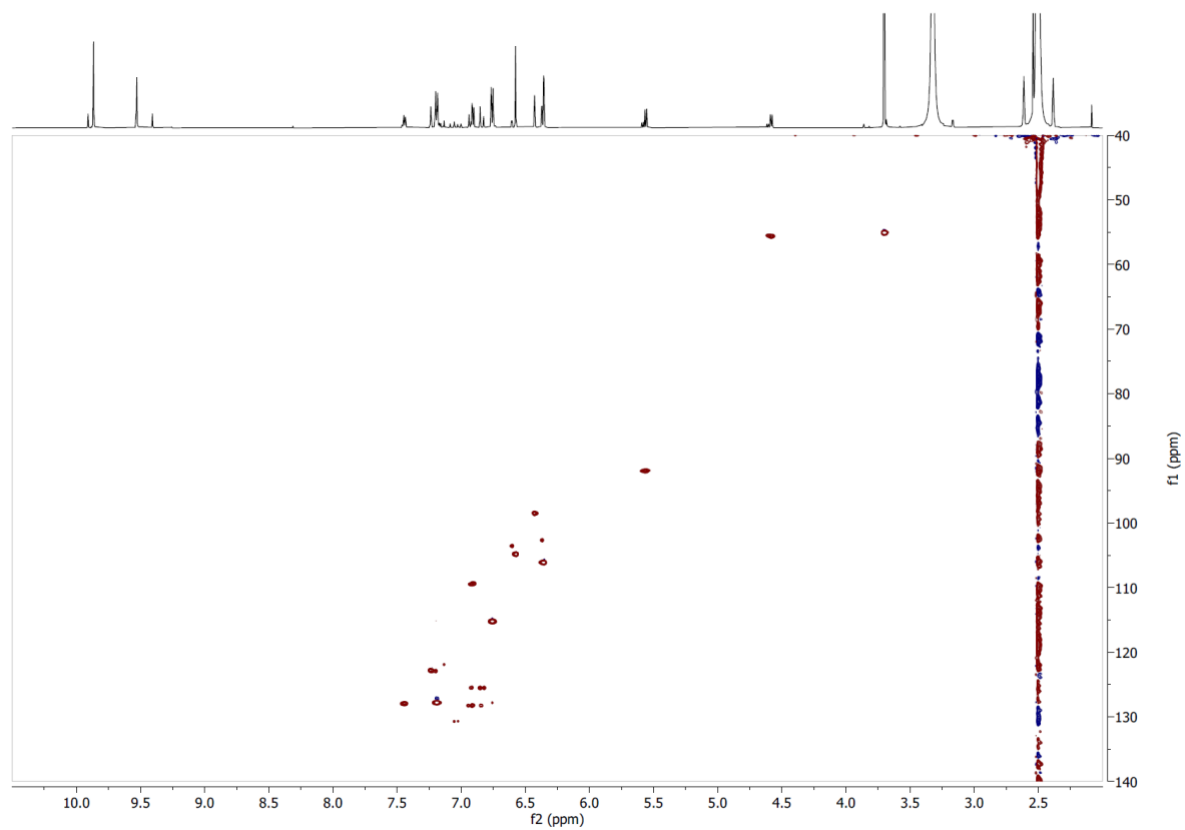

Edited HSQC NMR spectrum of compound **29** in DMSO-*d*<sub>6</sub>

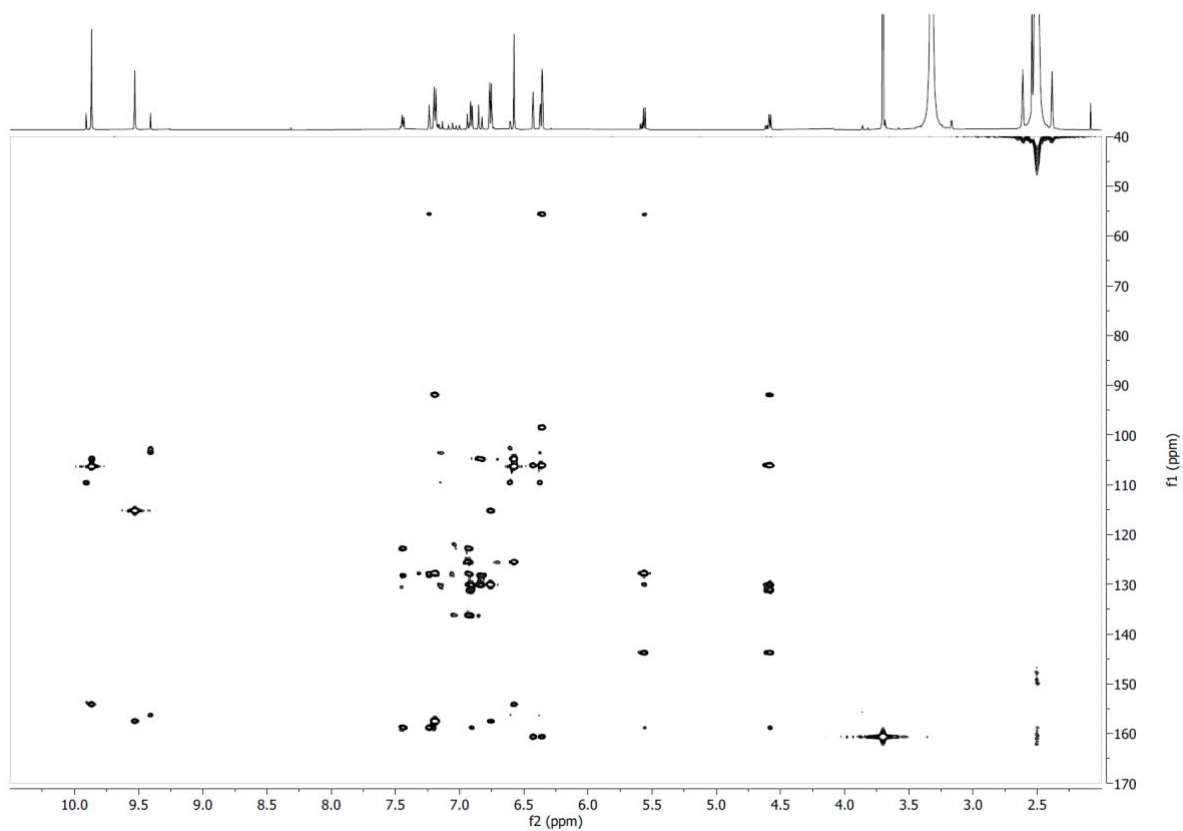

HMBC NMR spectrum of compound **29** in DMSO- $d_6$

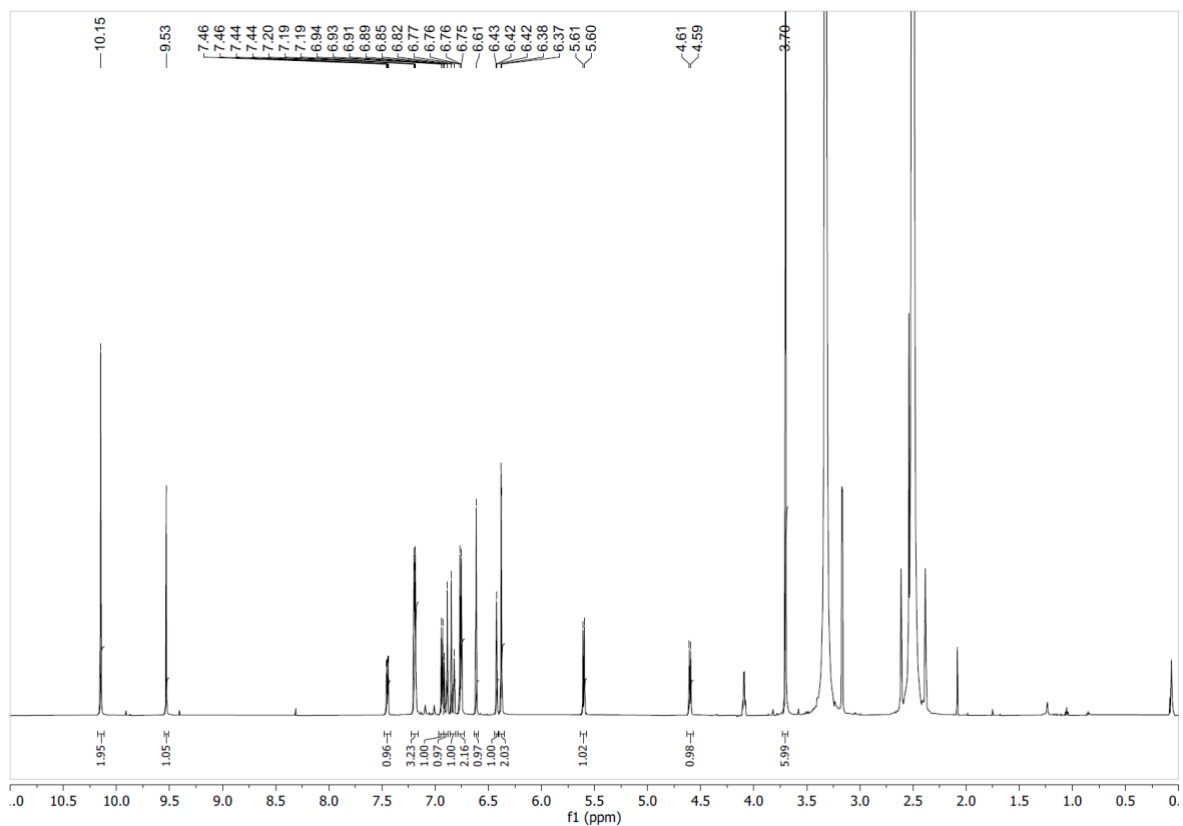

$^1\text{H}$  NMR spectrum of compound **30** in DMSO- $d_6$  at 600 MHz



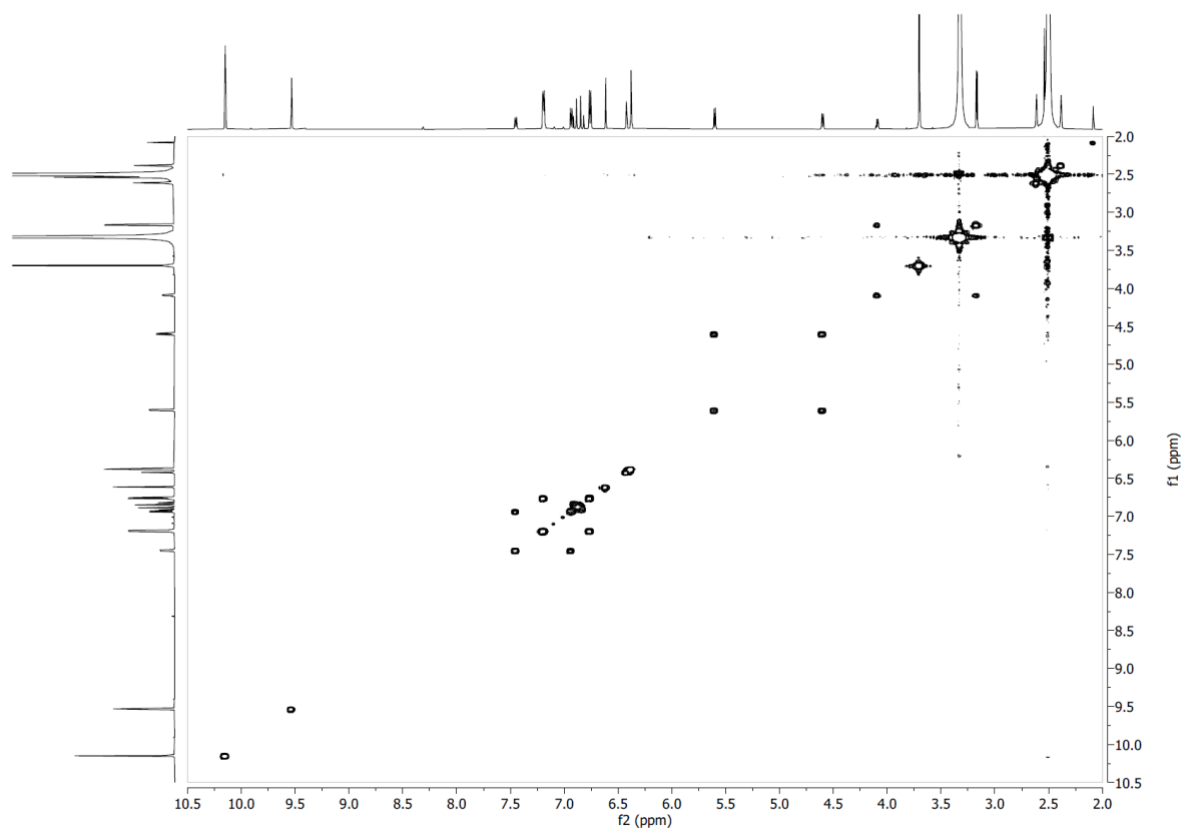

COSY NMR spectrum of compound **30** in DMSO-*d*<sub>6</sub>

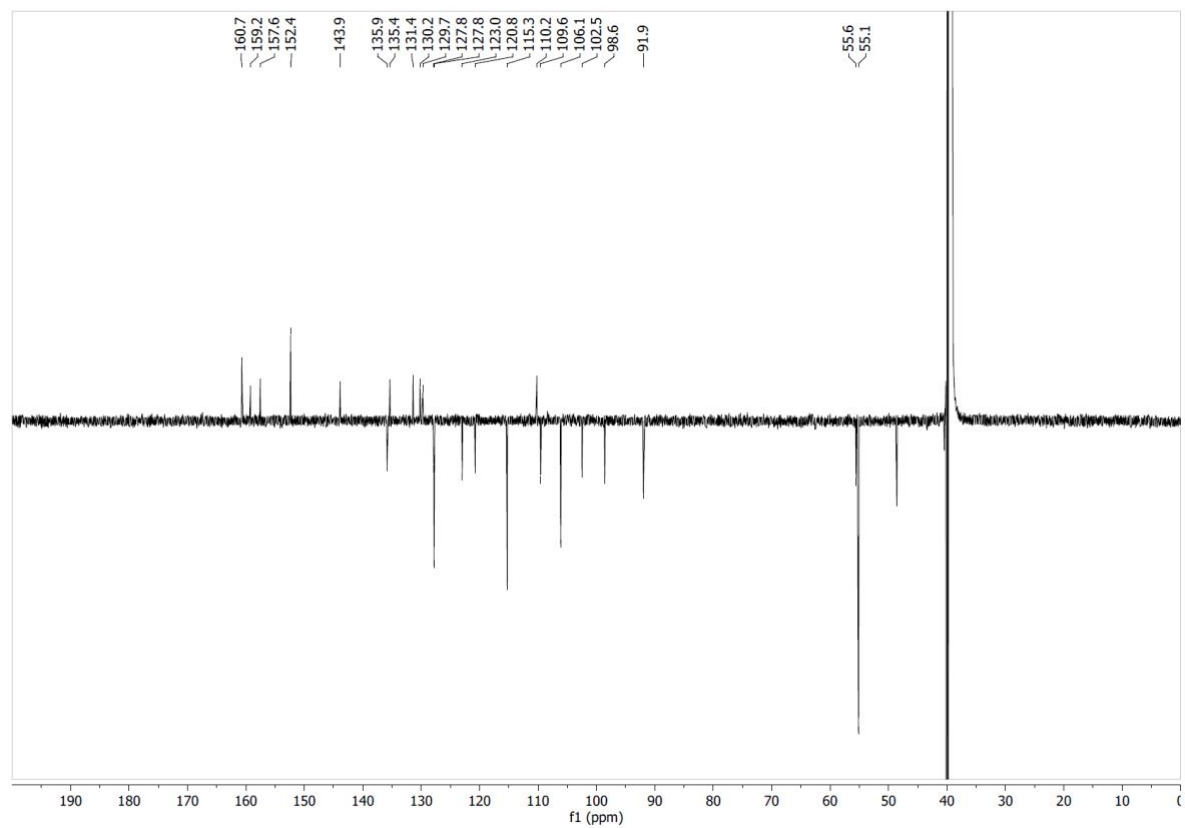

<sup>13</sup>C-DEPTQ NMR spectrum of compound **30** in DMSO-*d*<sub>6</sub> at 151 MHz

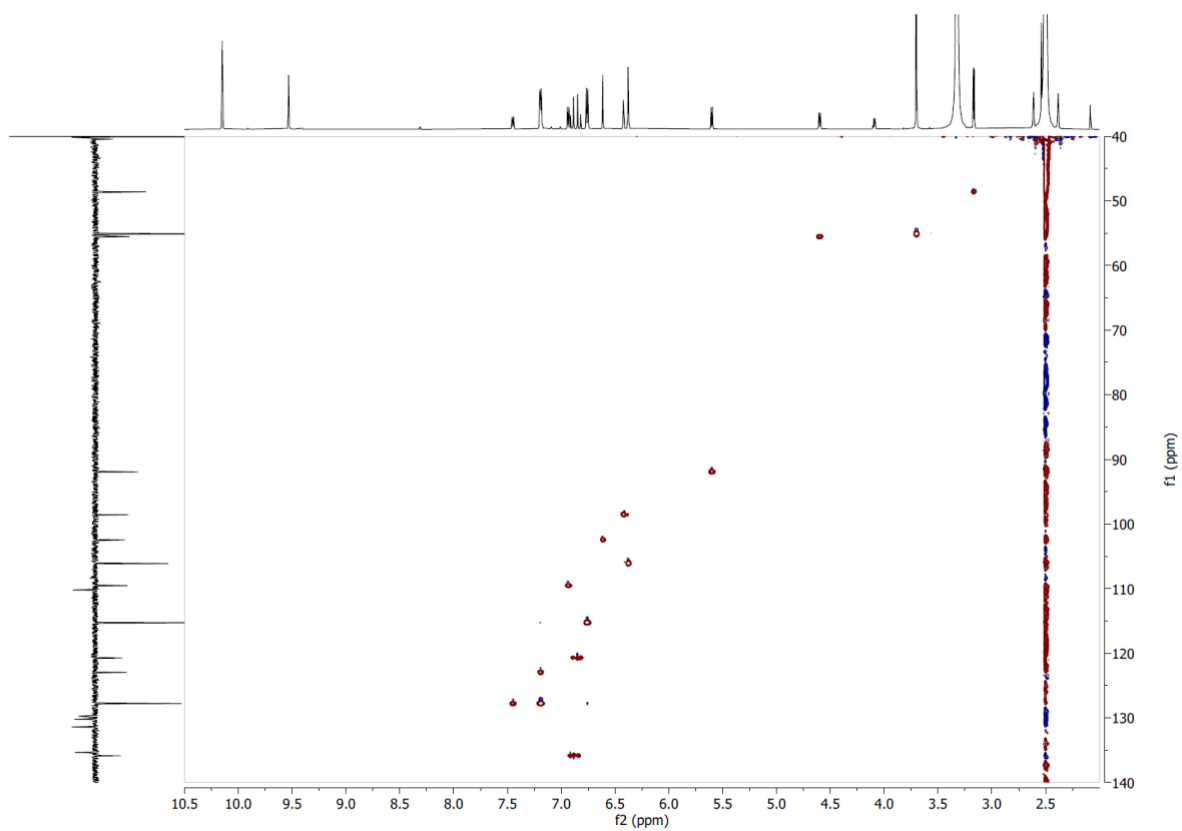

Edited HSQC NMR spectrum of compound **30** in DMSO-*d*<sub>6</sub>

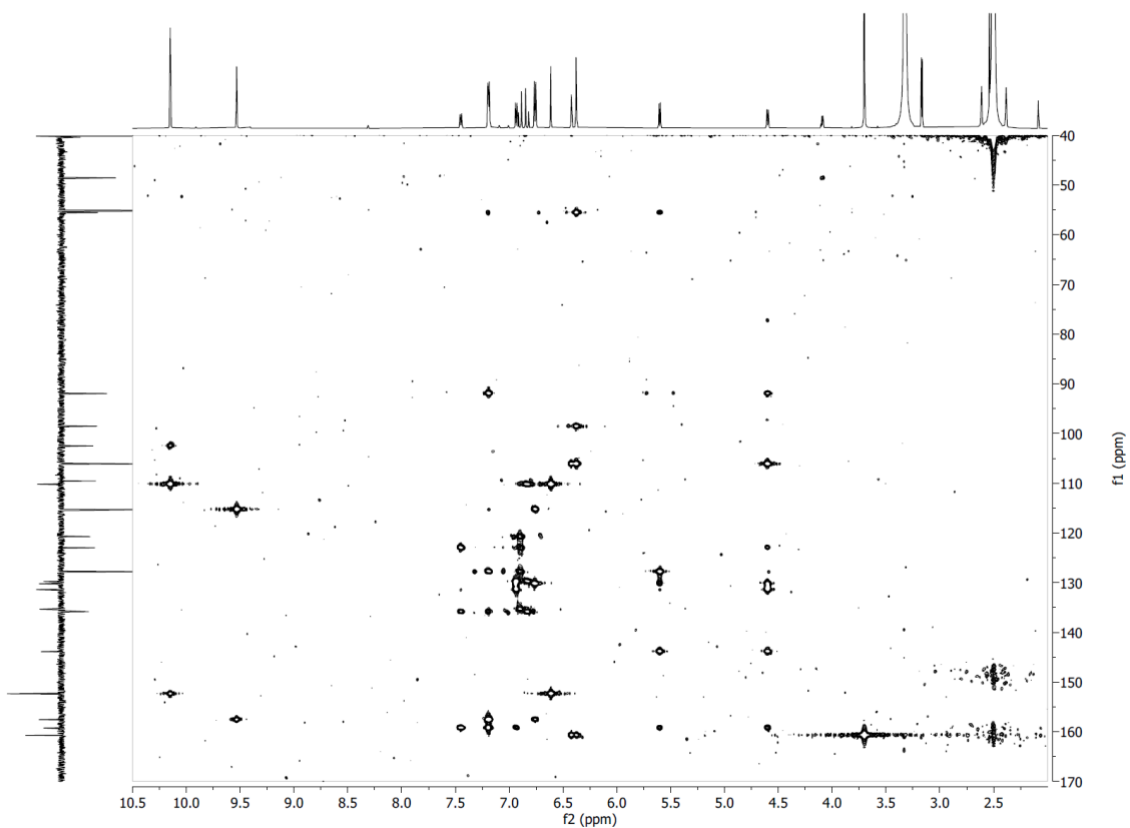

HMBC NMR spectrum of compound **30** in DMSO-*d*<sub>6</sub>

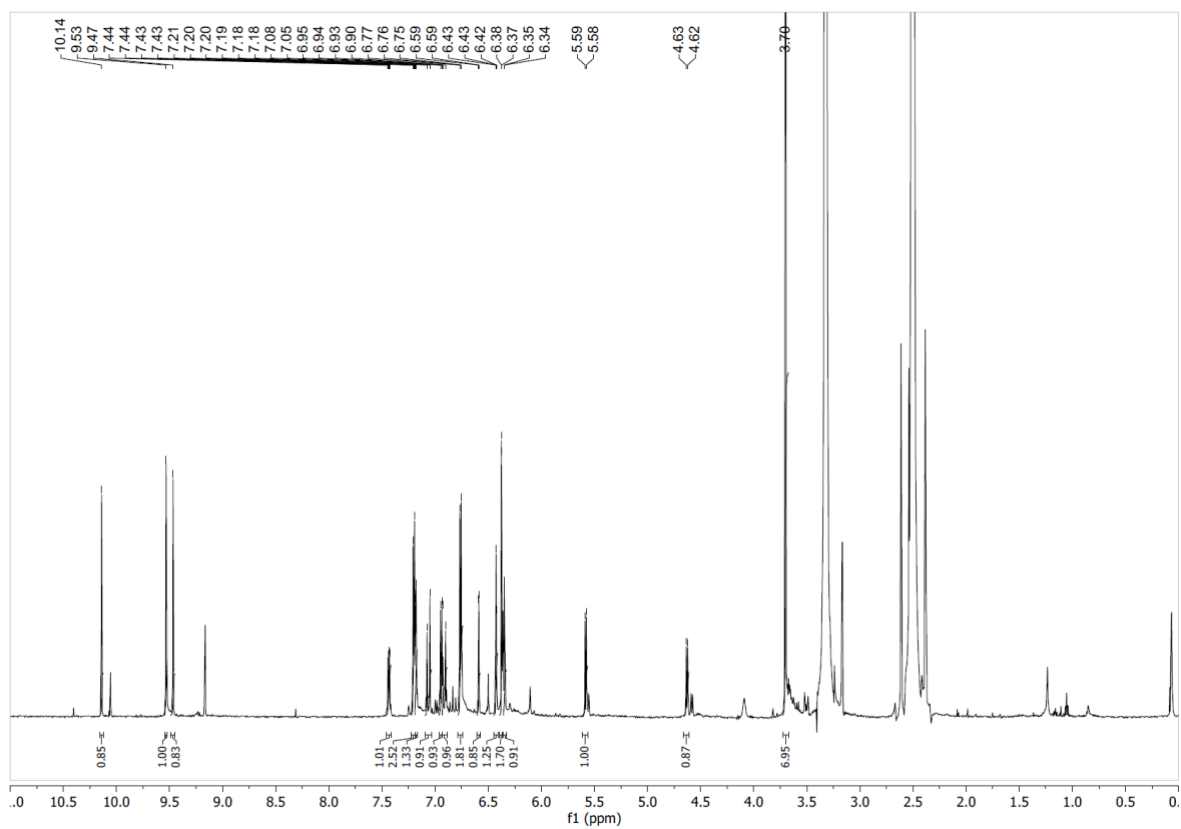

$^1\text{H}$  NMR spectrum of compound **31** in  $\text{DMSO-}d_6$  at 600 MHz

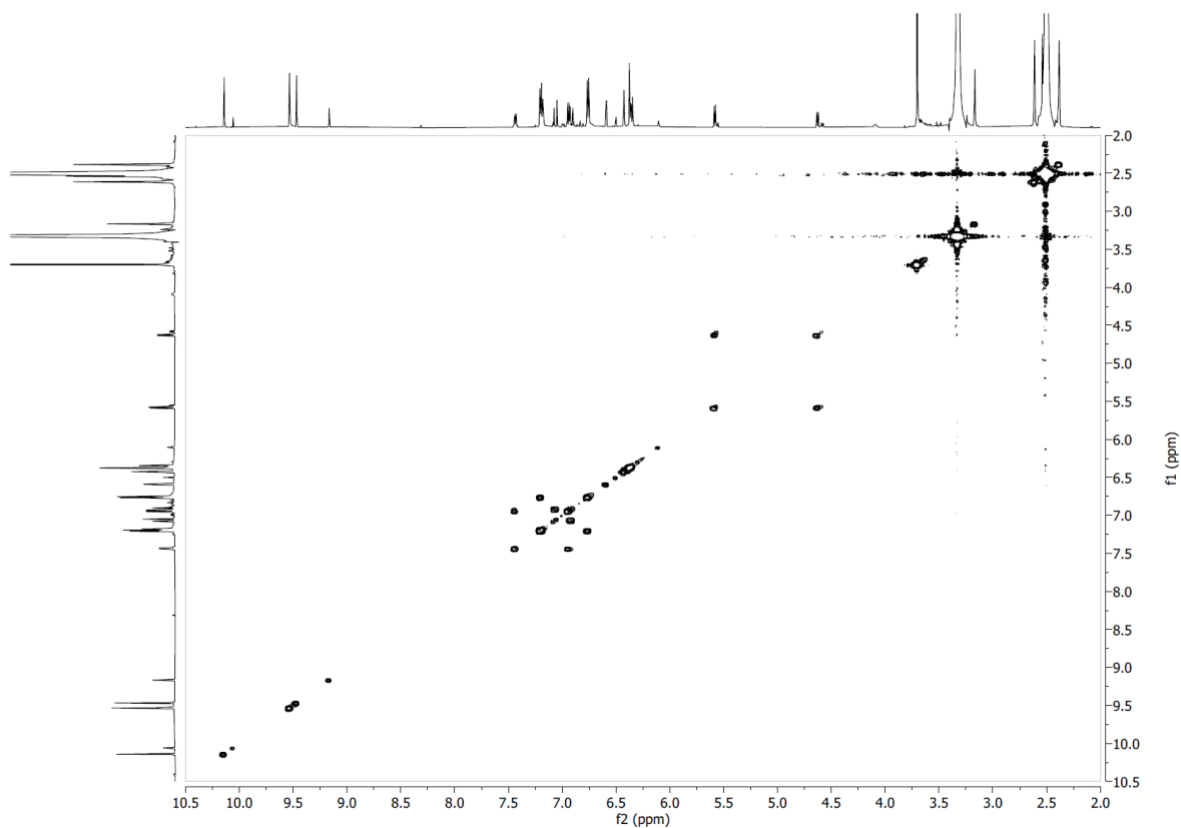

COSY NMR spectrum of compound **31** in  $\text{DMSO-}d_6$

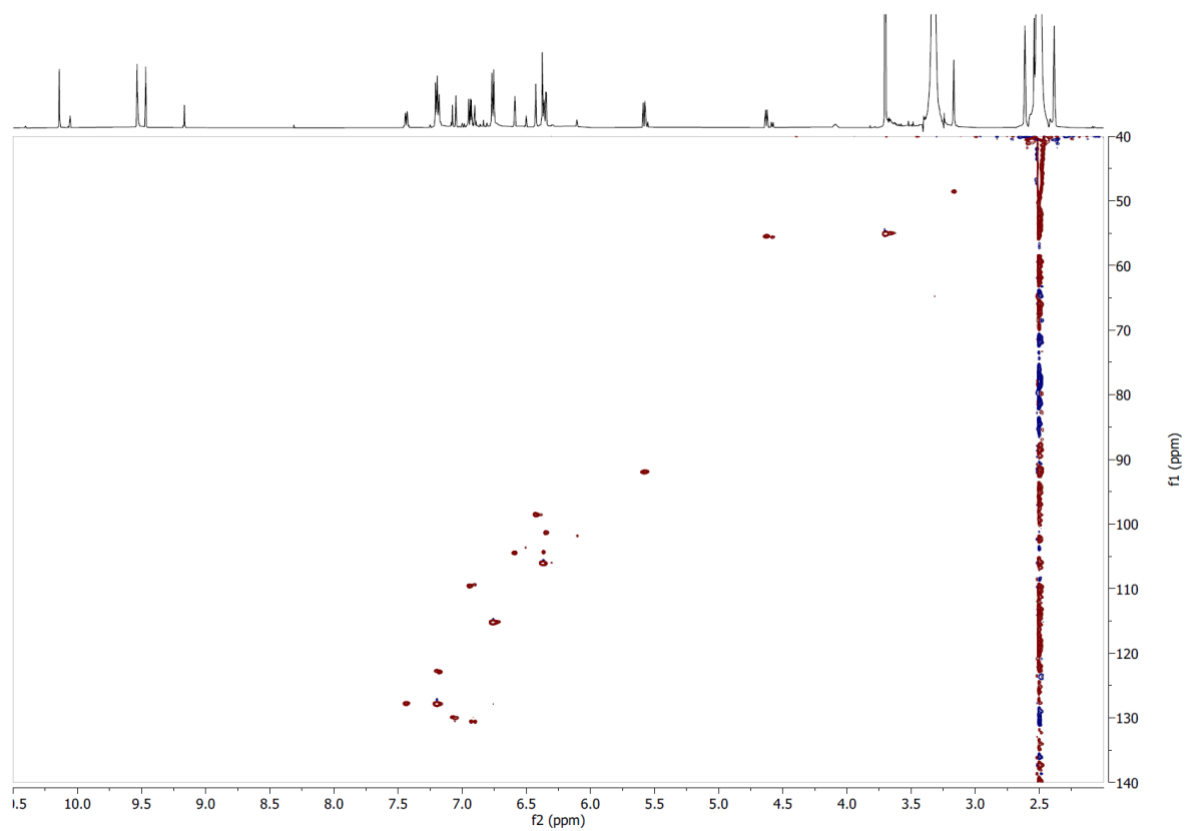

Edited HSQC NMR spectrum of compound **31** in DMSO-*d*<sub>6</sub>

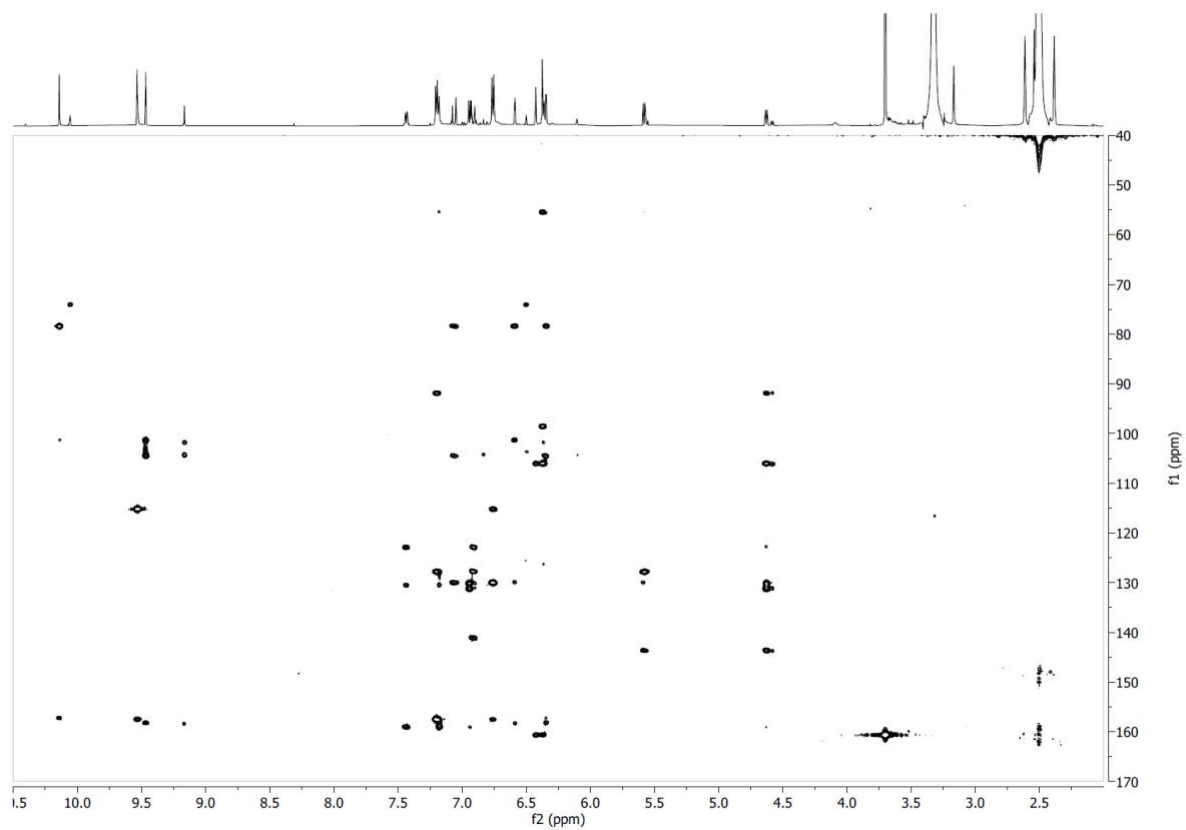

HMBC NMR spectrum of compound **31** in DMSO-*d*<sub>6</sub>

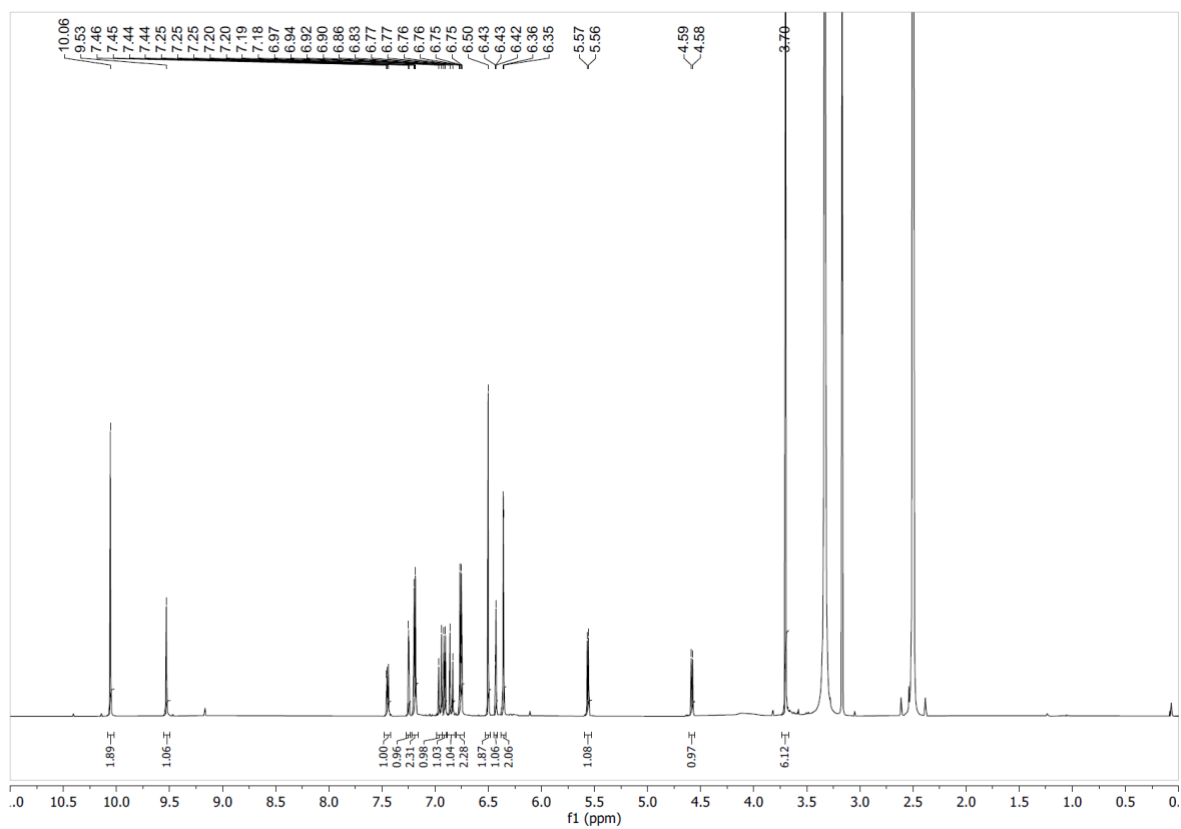

$^1\text{H}$  NMR spectrum of compound **32** in  $\text{DMSO-}d_6$  at 600 MHz

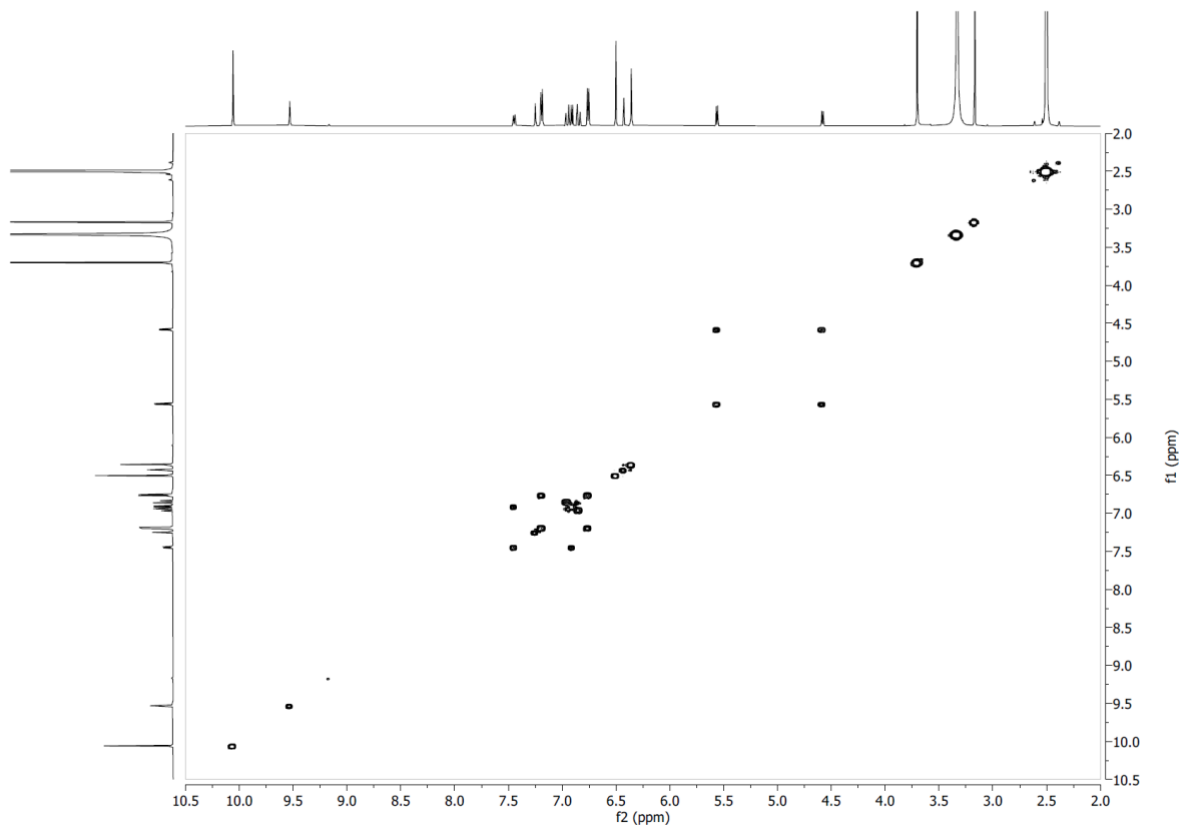

COSY NMR spectrum of compound **32** in  $\text{DMSO-}d_6$

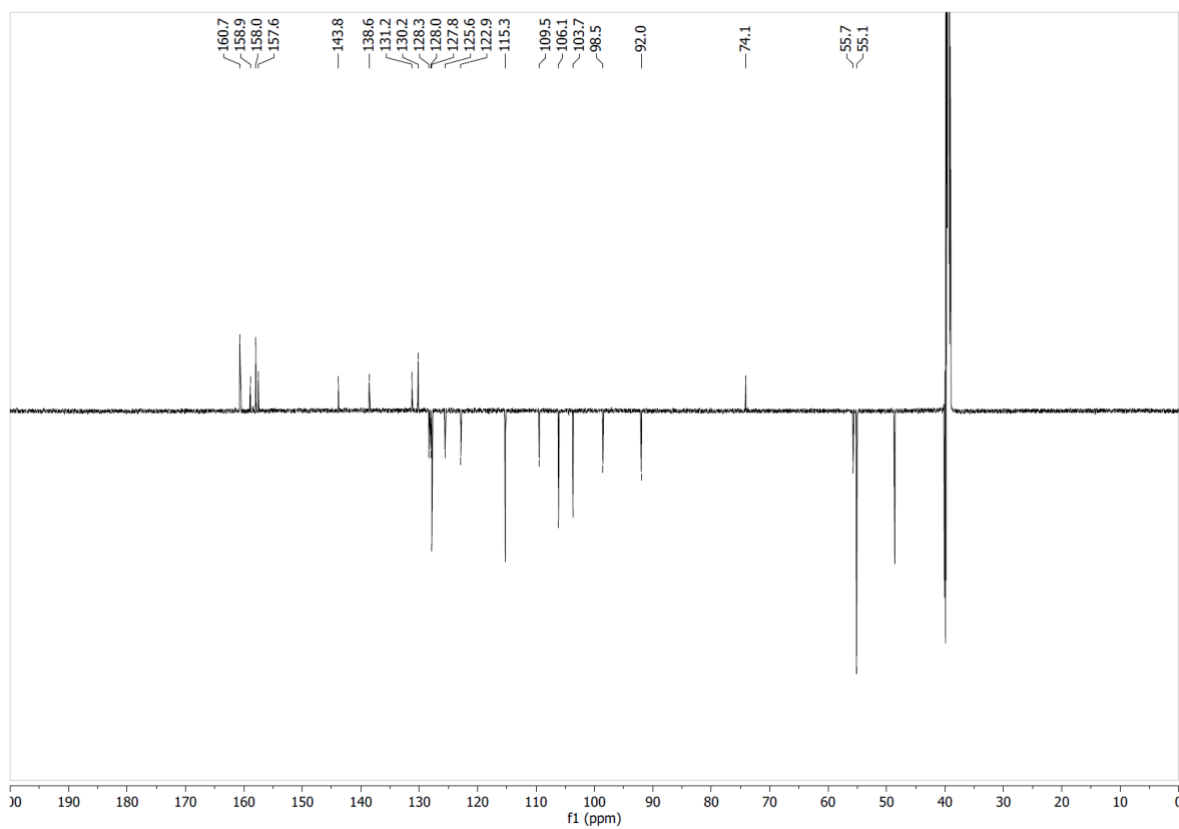

$^{13}\text{C}$ -DEPTQ NMR spectrum of compound **32** in  $\text{DMSO-}d_6$  at 151 MHz

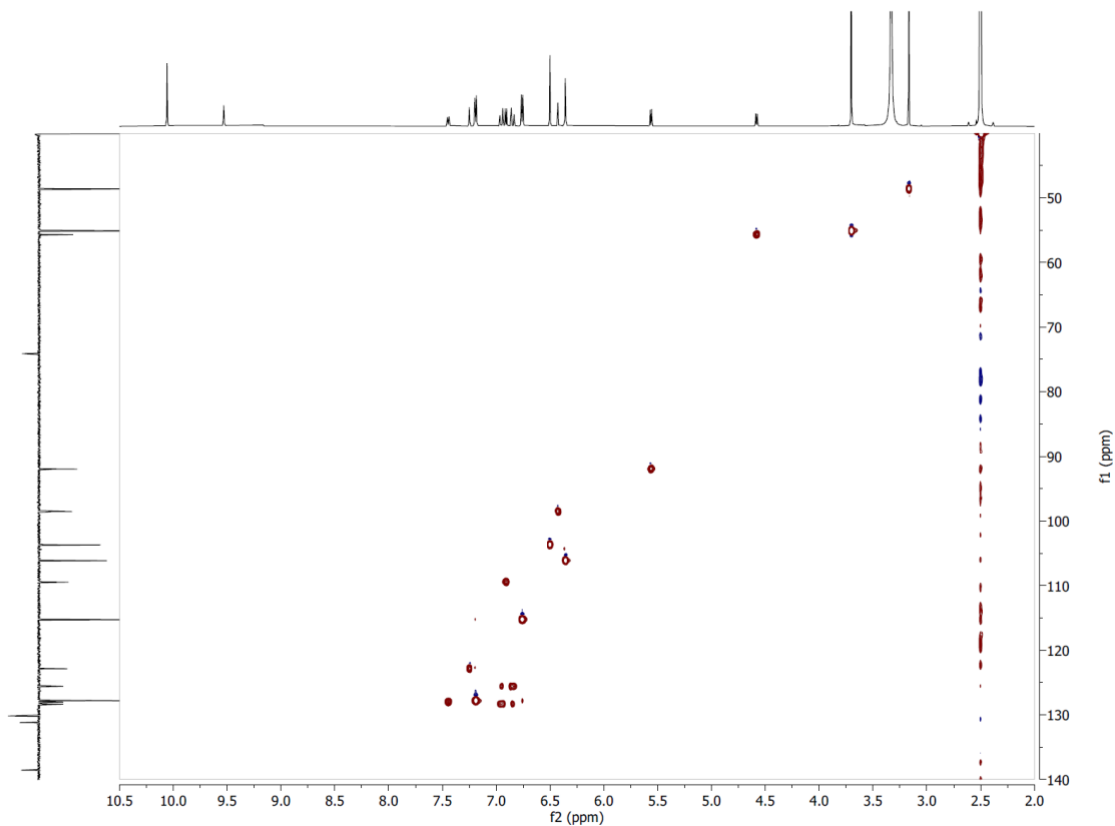

Edited HSQC NMR spectrum of compound **32** in  $\text{DMSO-}d_6$

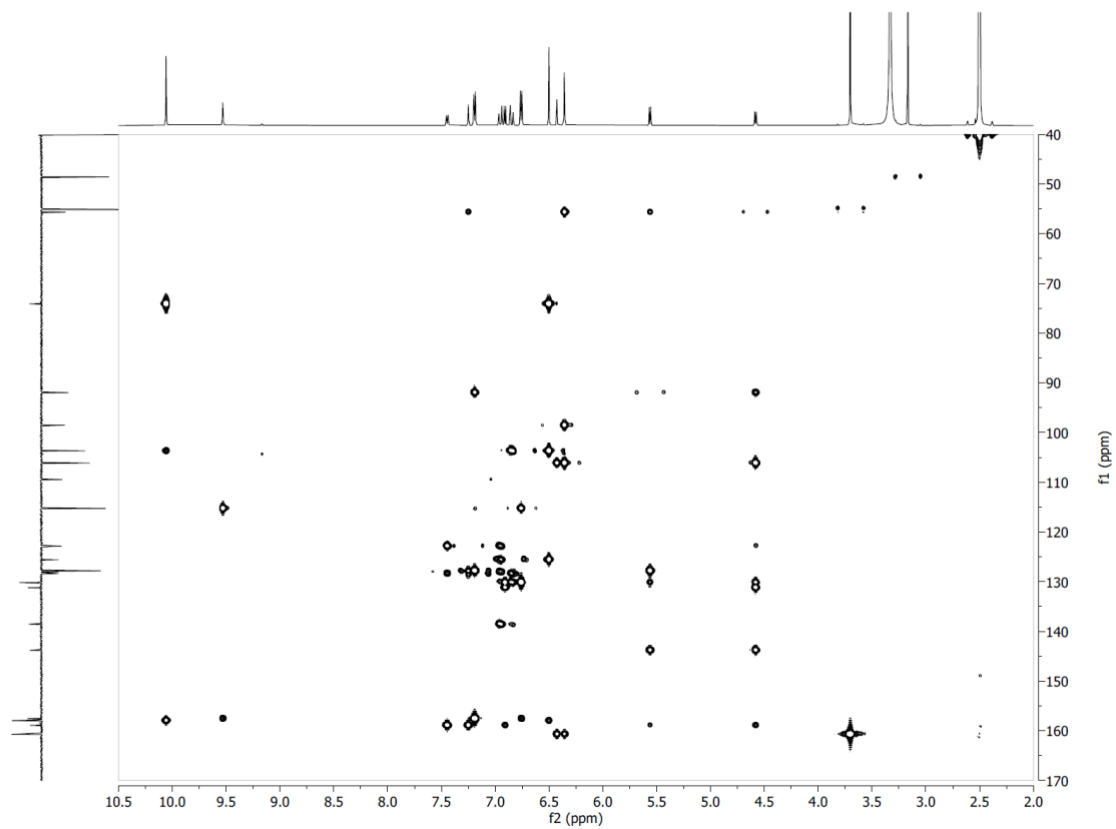

HMBC NMR spectrum of compound **32** in DMSO- $d_6$

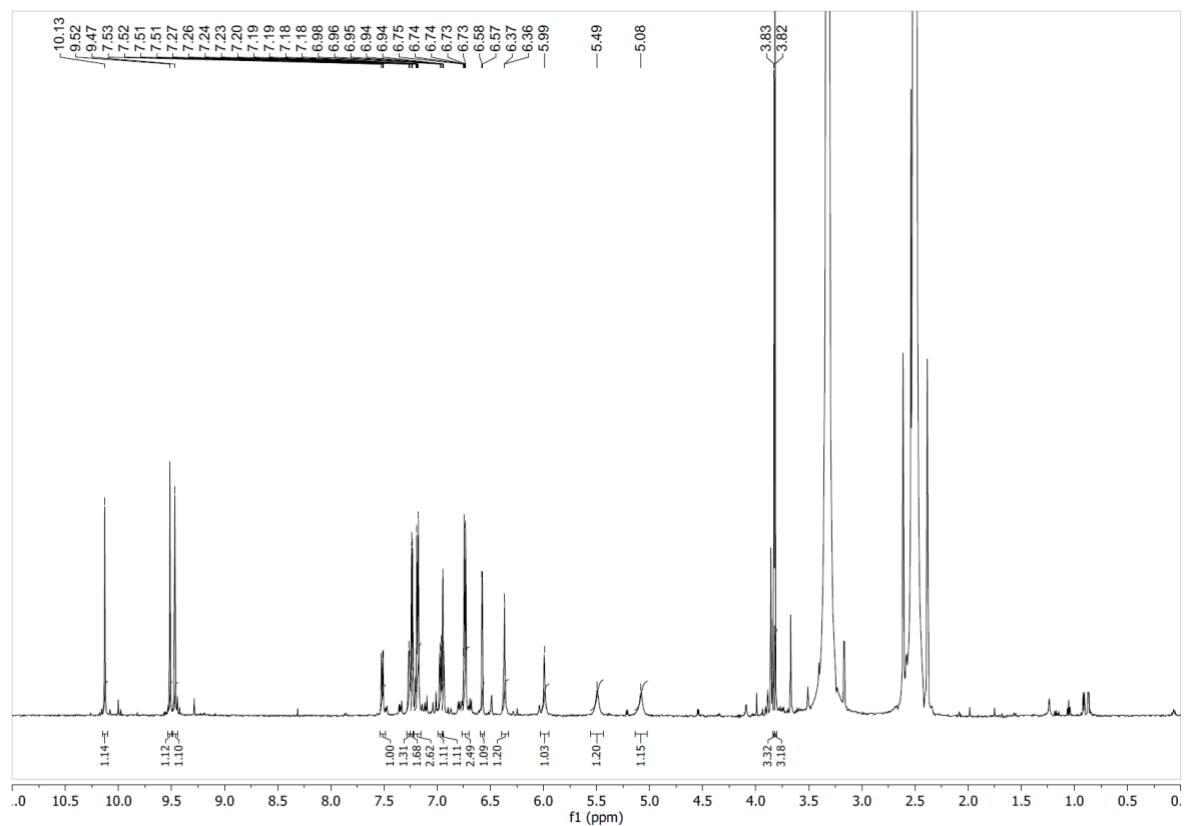

$^1\text{H}$  NMR spectrum of compound **33** in DMSO- $d_6$  at 600 MHz

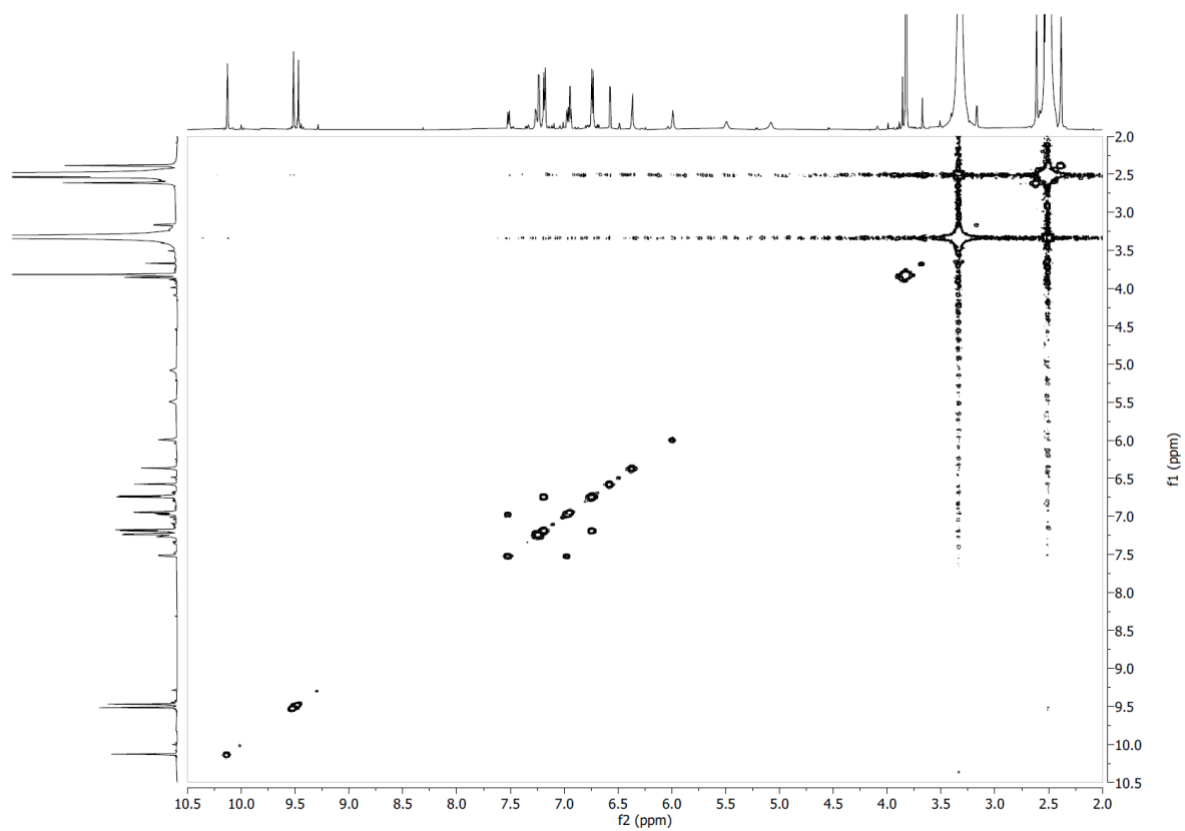

COSY NMR spectrum of compound **33** in DMSO-*d*<sub>6</sub>

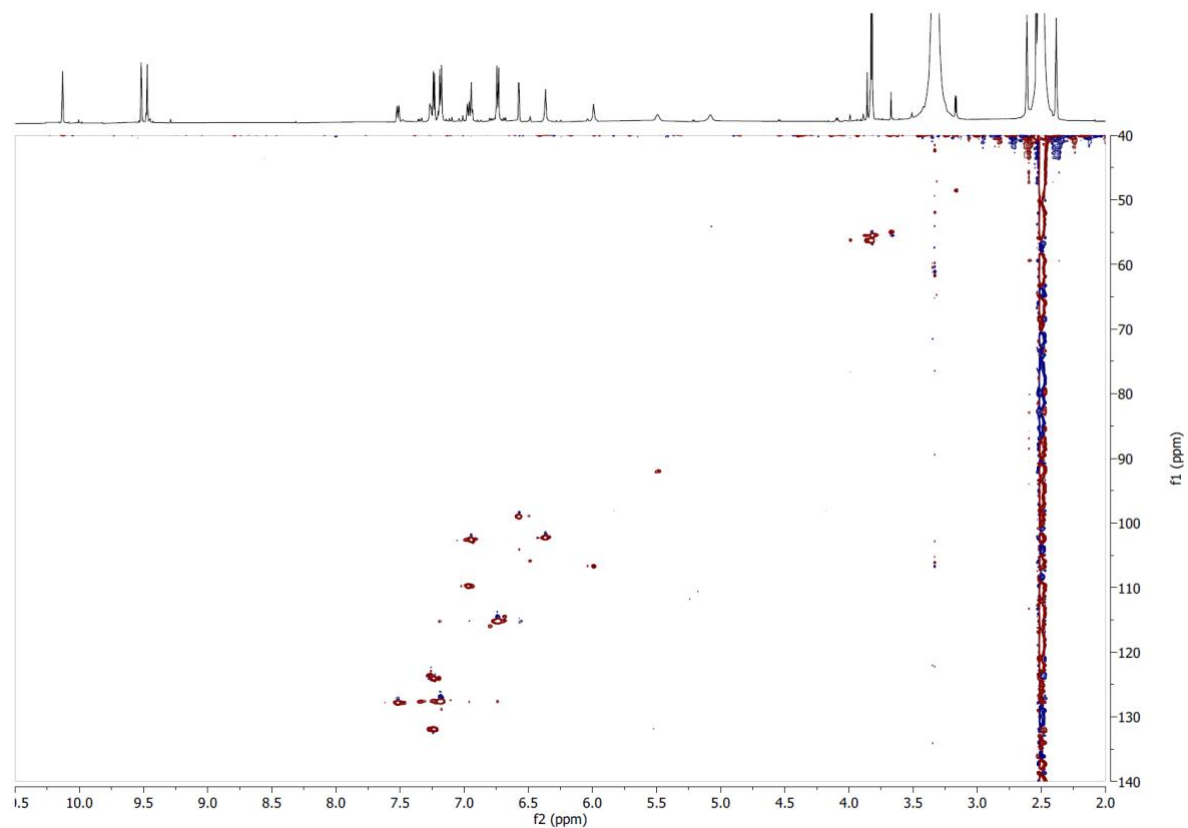

Edited HSQC NMR spectrum of compound **33** in DMSO-*d*<sub>6</sub>



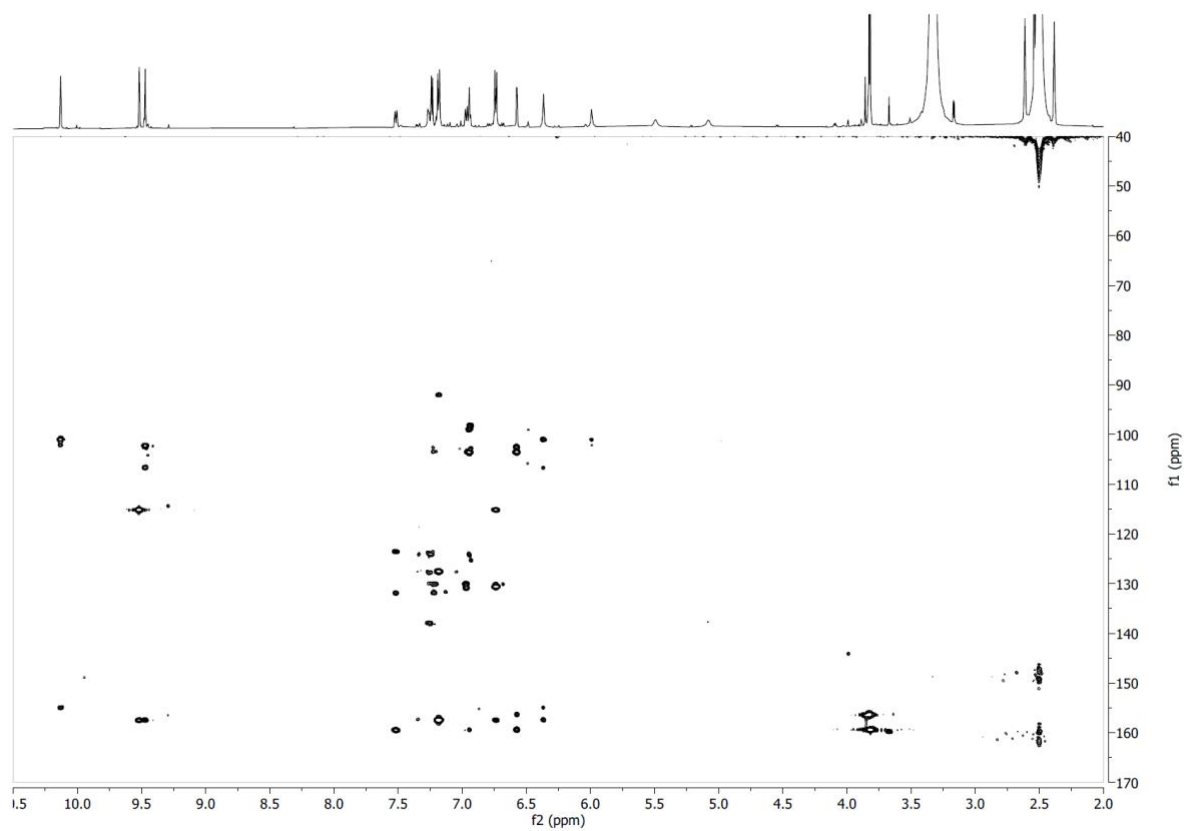

HMBC NMR spectrum of compound **33** in DMSO-*d*<sub>6</sub>

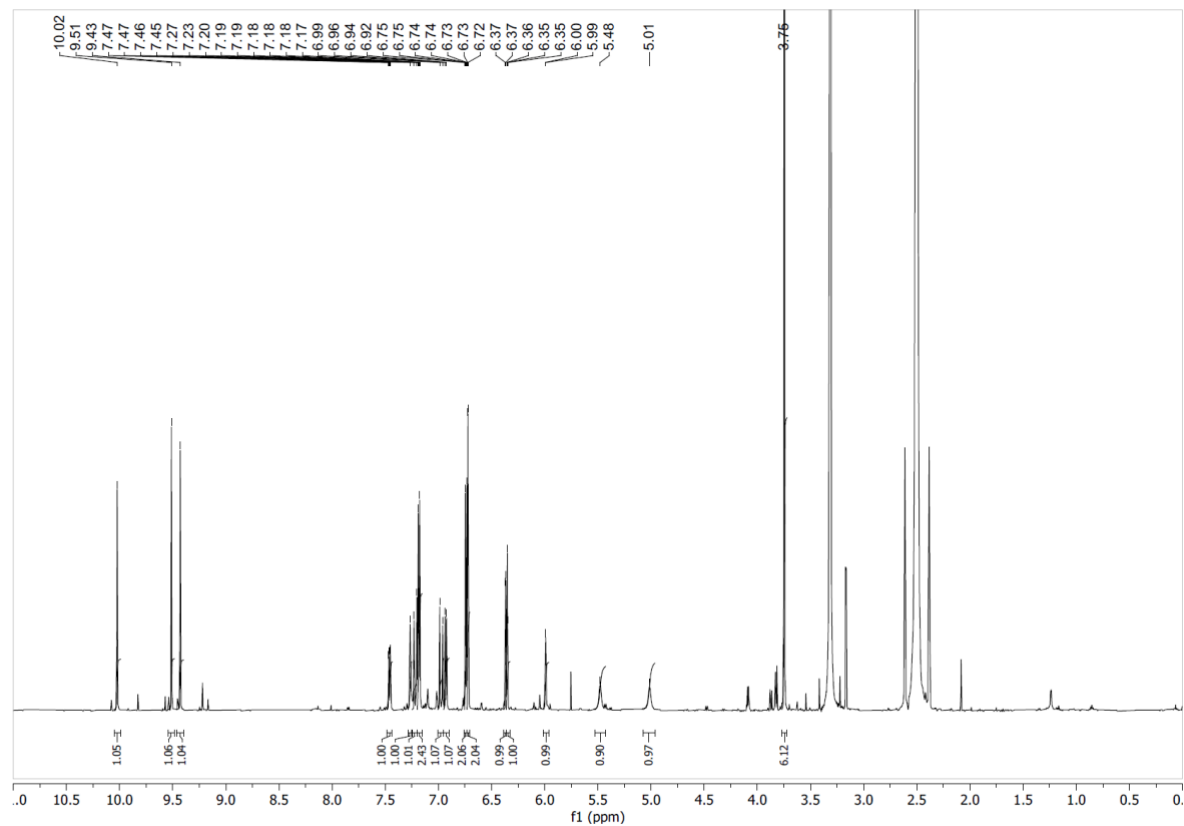

<sup>1</sup>H NMR spectrum of compound **34** in DMSO-*d*<sub>6</sub> at 600 MHz

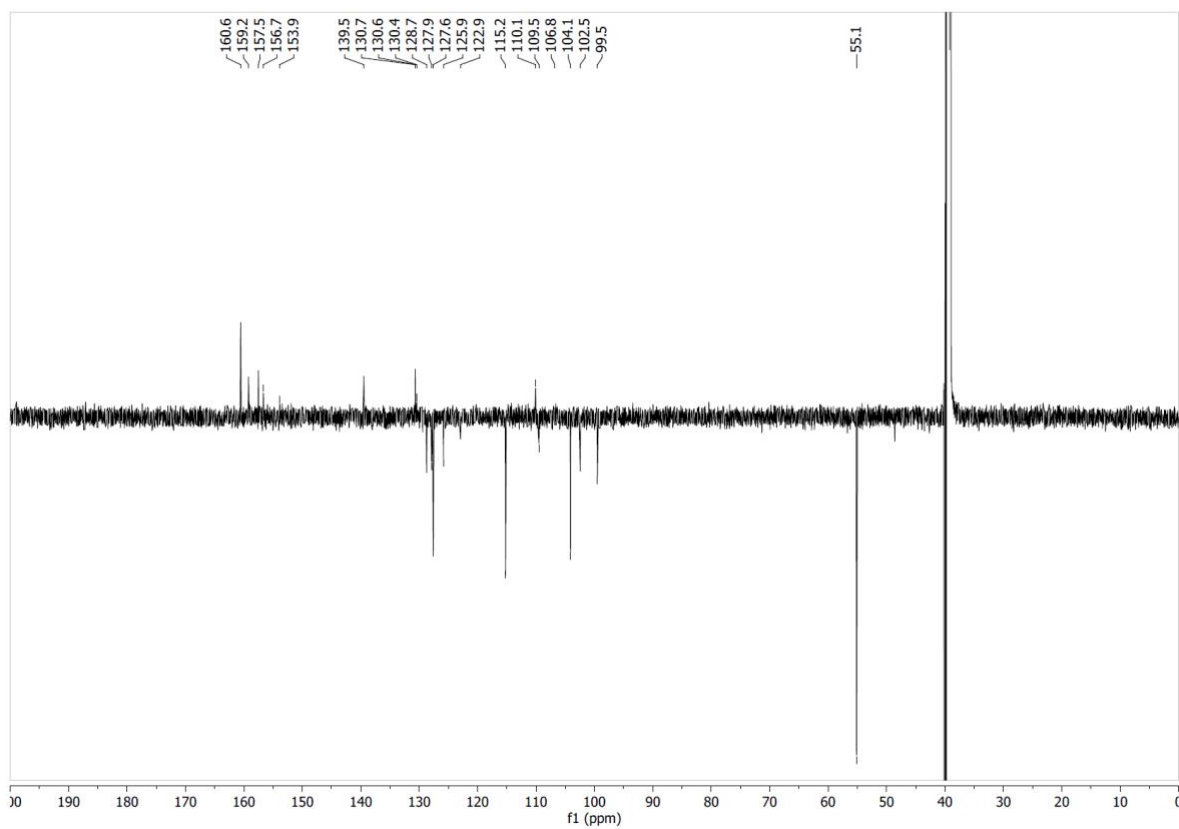

$^{13}\text{C}$ -DEPTQ NMR spectrum of compound **34** in  $\text{DMSO-}d_6$  at 151 MHz

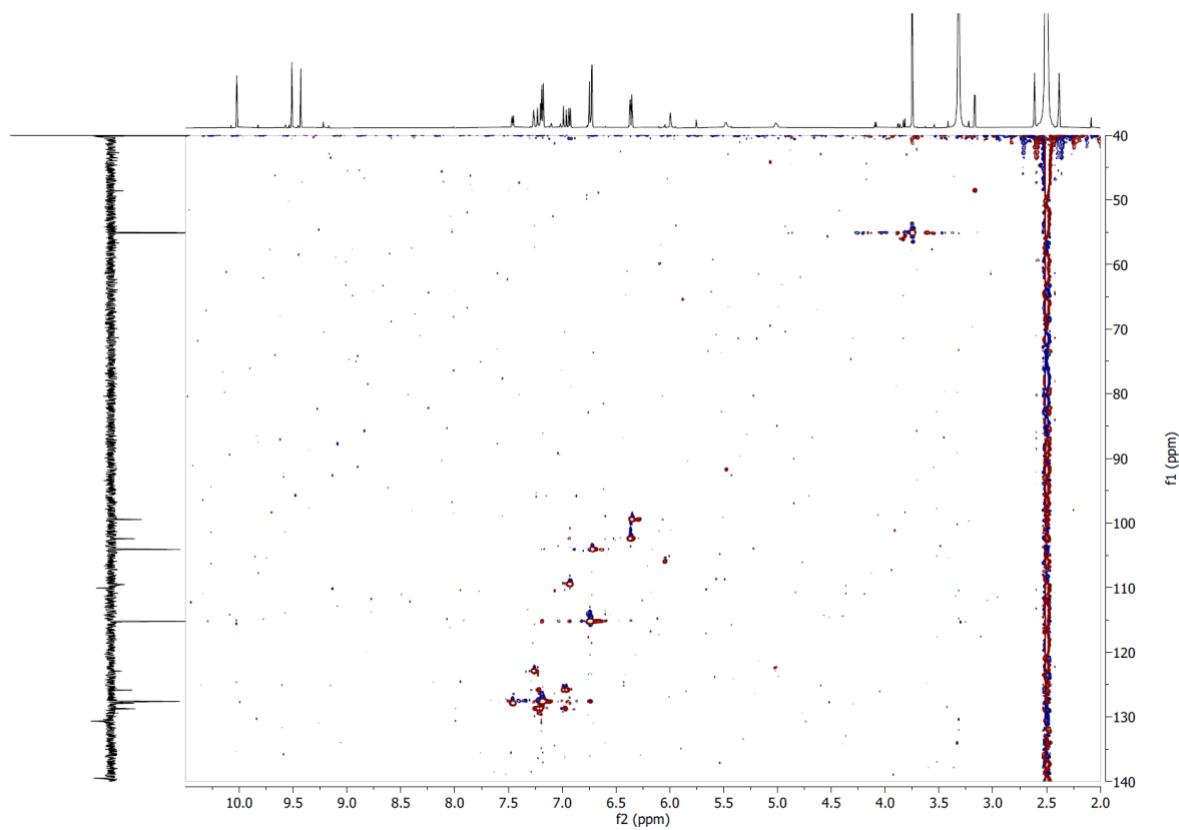

Edited HSQC NMR spectrum of compound **34** in  $\text{DMSO-}d_6$



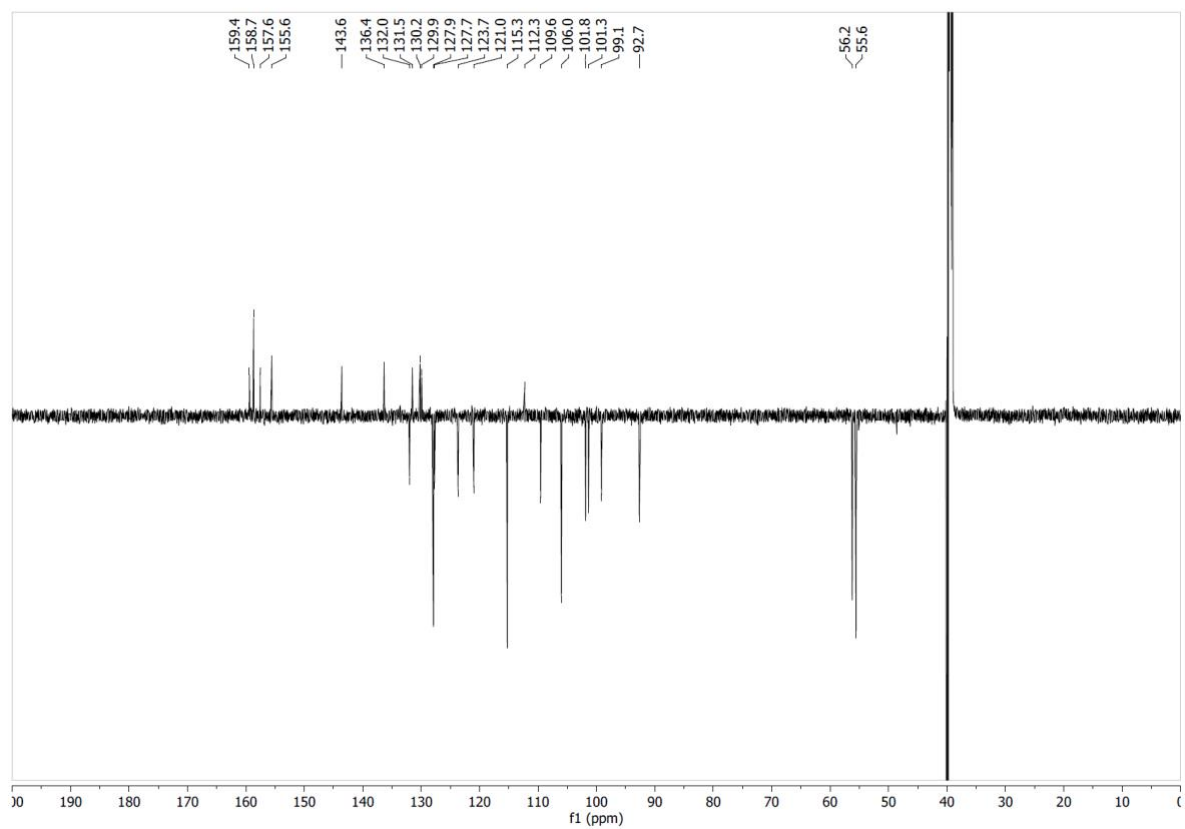

$^{13}\text{C}$ -DEPTQ NMR spectrum of compound **35** in  $\text{DMSO-}d_6$  at 151 MHz

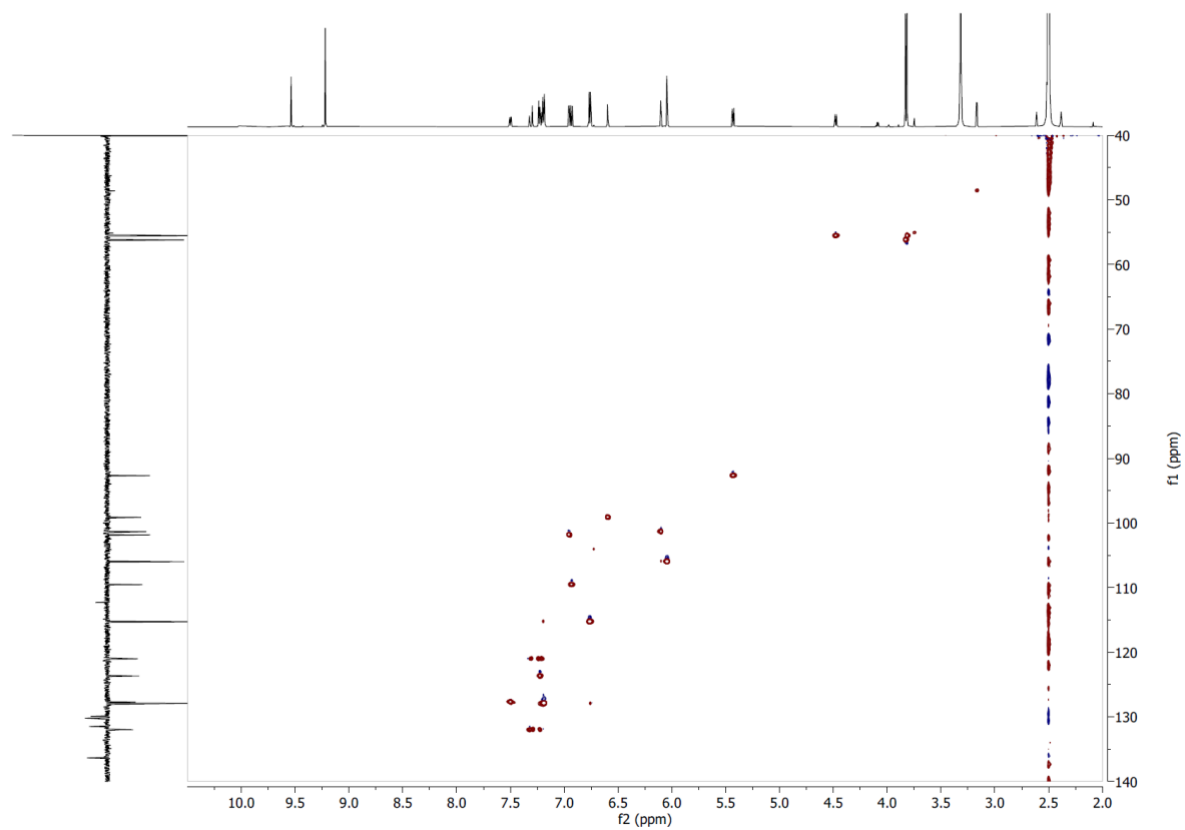

Edited HSQC NMR spectrum of compound **35** in  $\text{DMSO-}d_6$

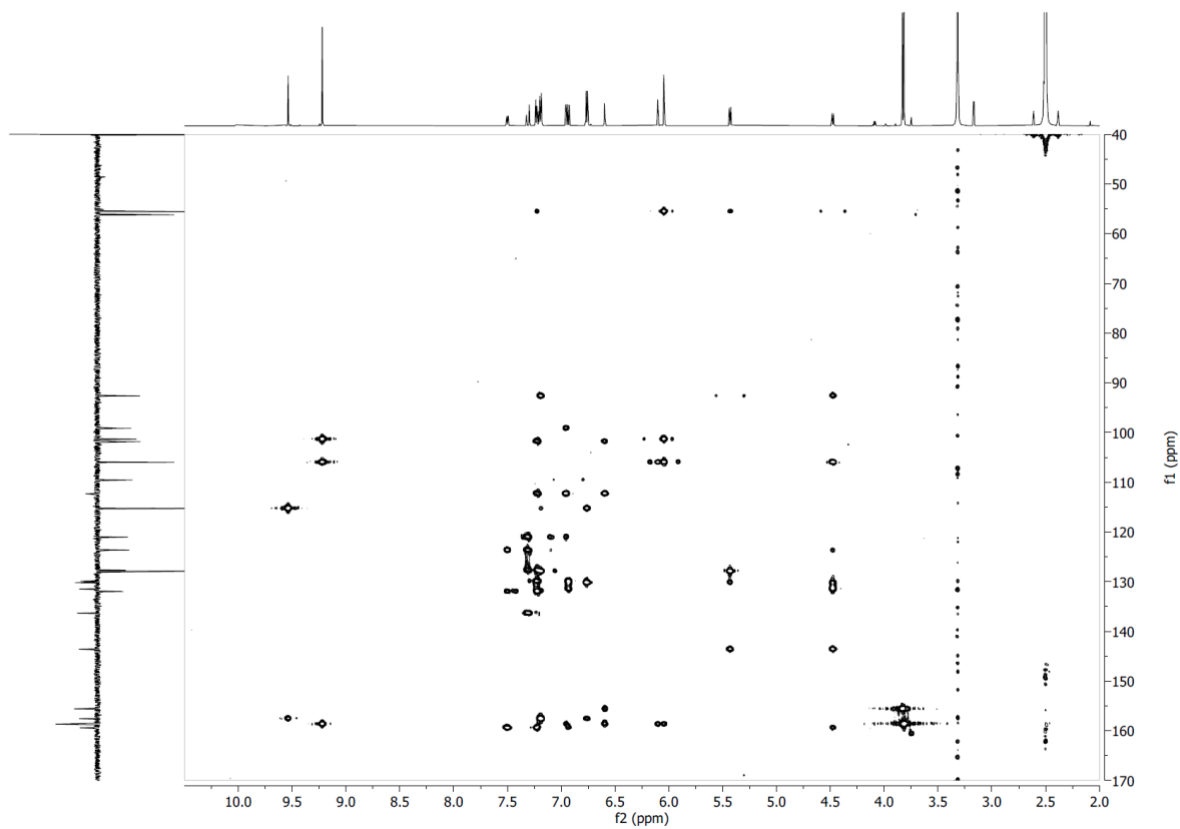

HMBC NMR spectrum of compound **35** in DMSO-*d*<sub>6</sub>

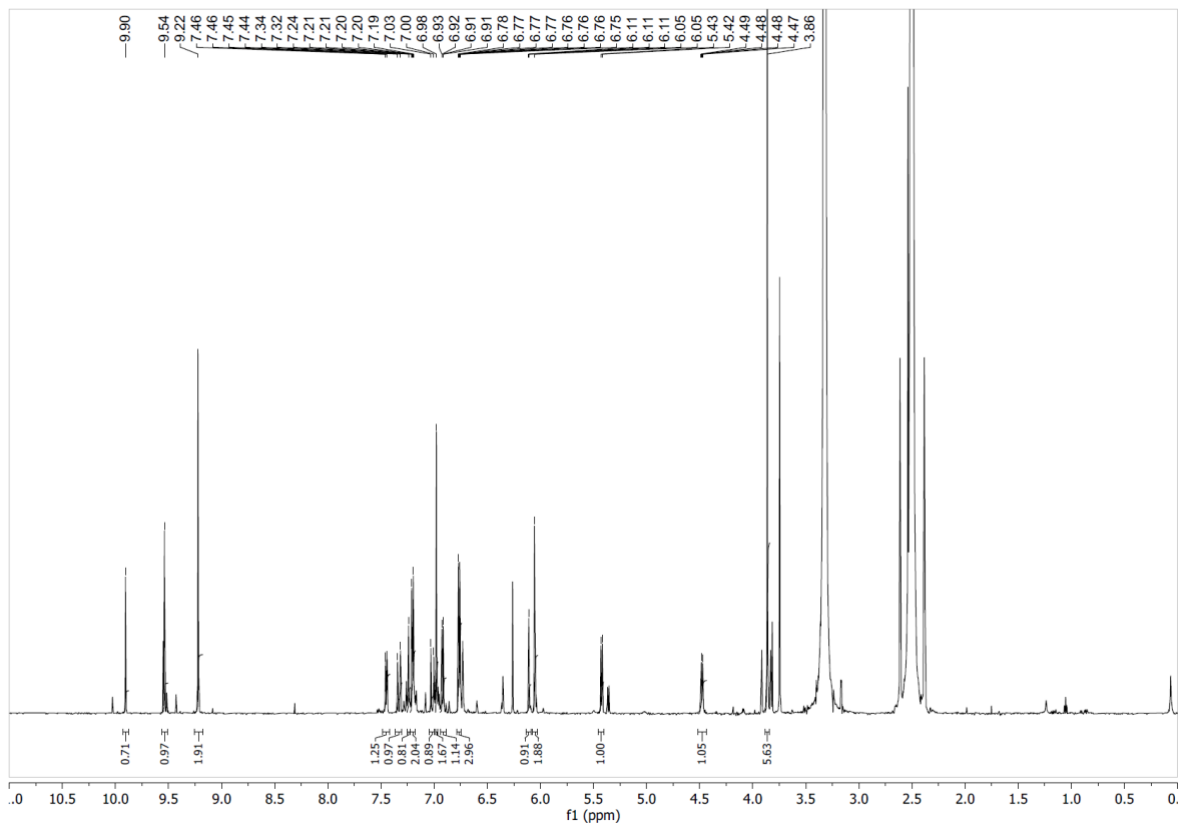

<sup>1</sup>H NMR spectrum of compound **36** in DMSO-*d*<sub>6</sub> at 600 MHz

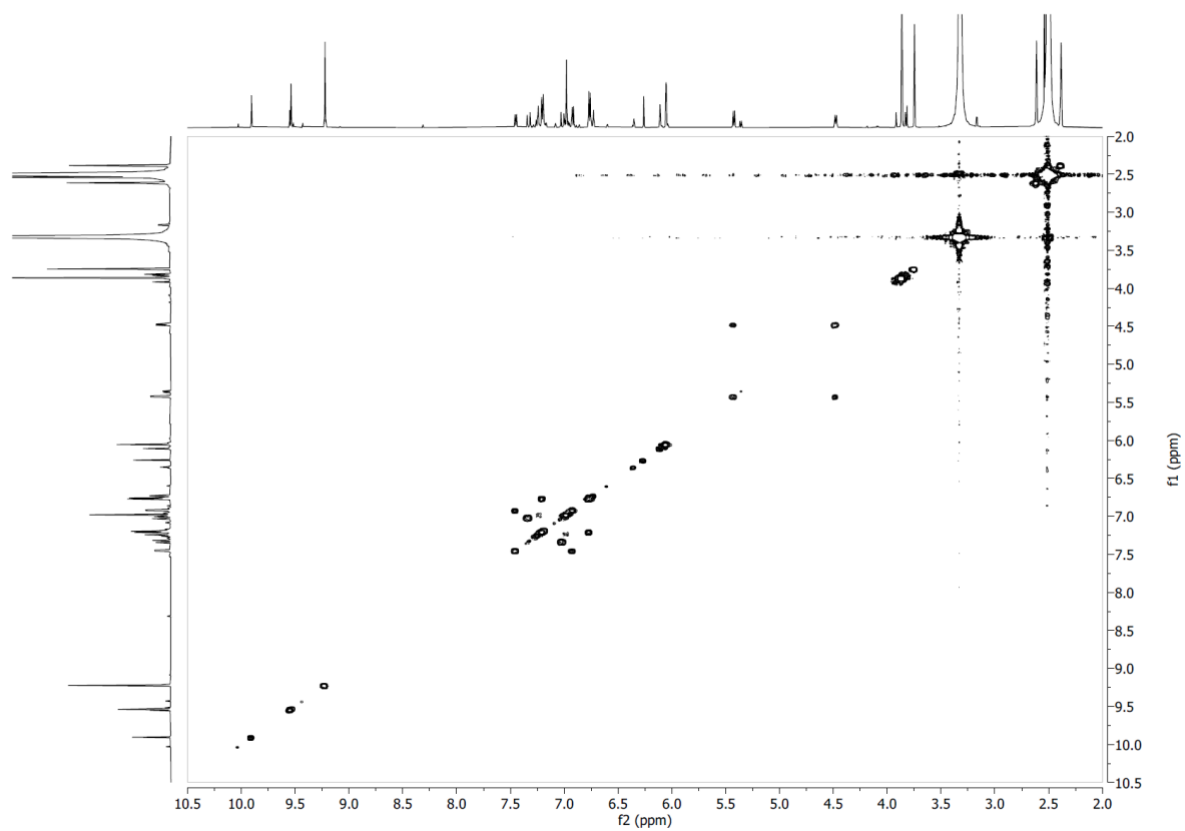

COSY NMR spectrum of compound **36** in DMSO- $d_6$

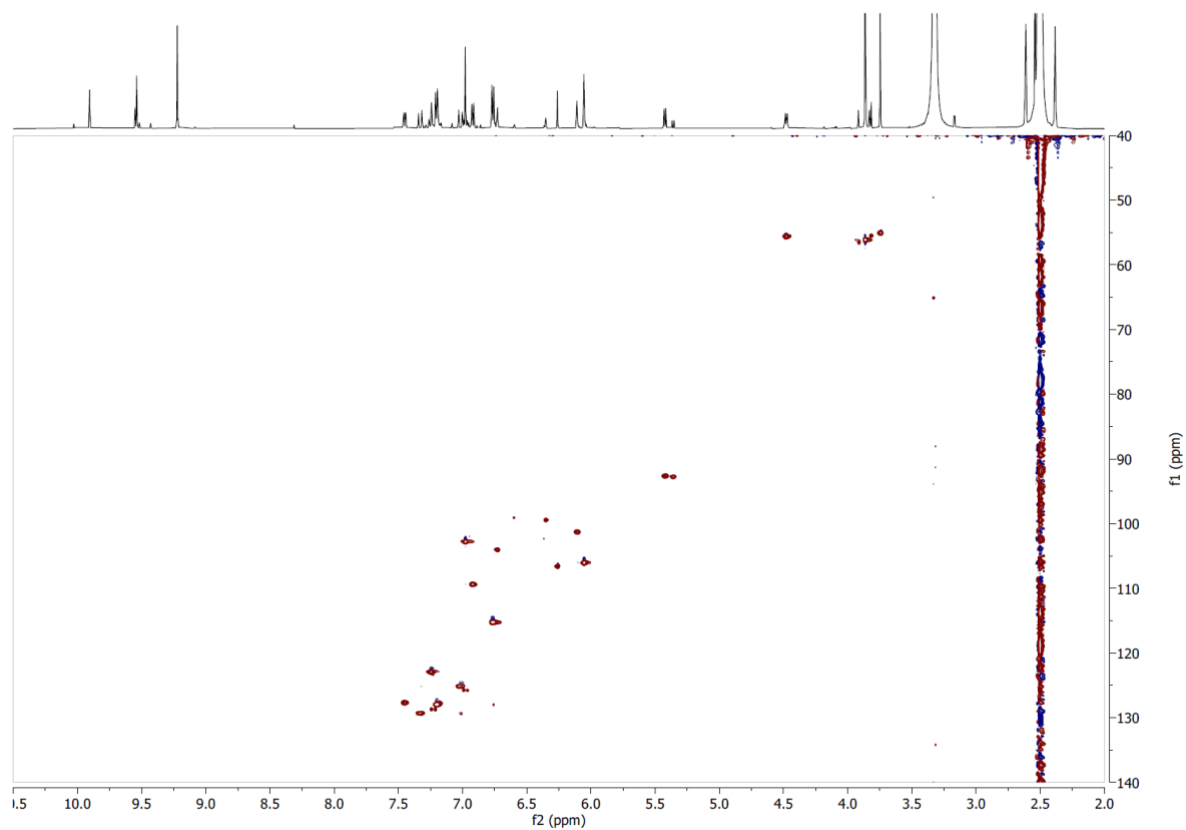

Edited HSQC NMR spectrum of compound **36** in DMSO- $d_6$

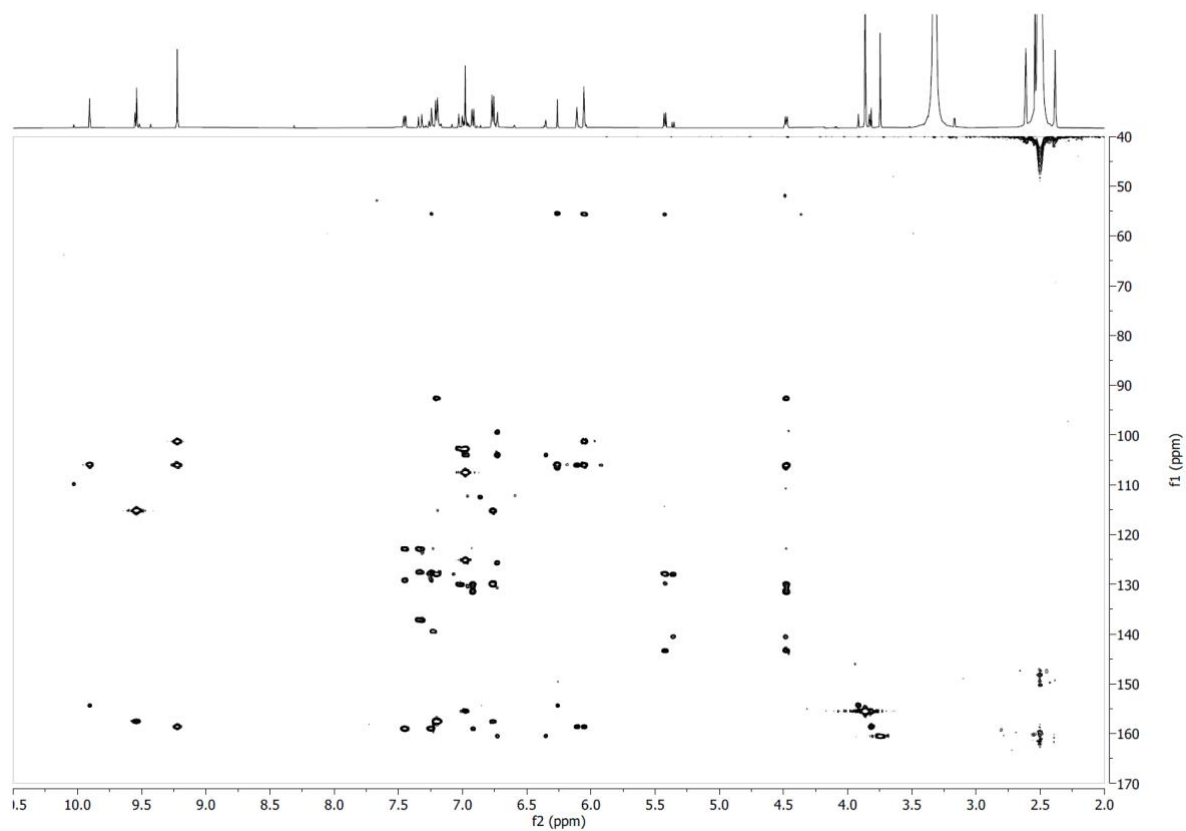

HMBC NMR spectrum of compound **36** in DMSO- $d_6$

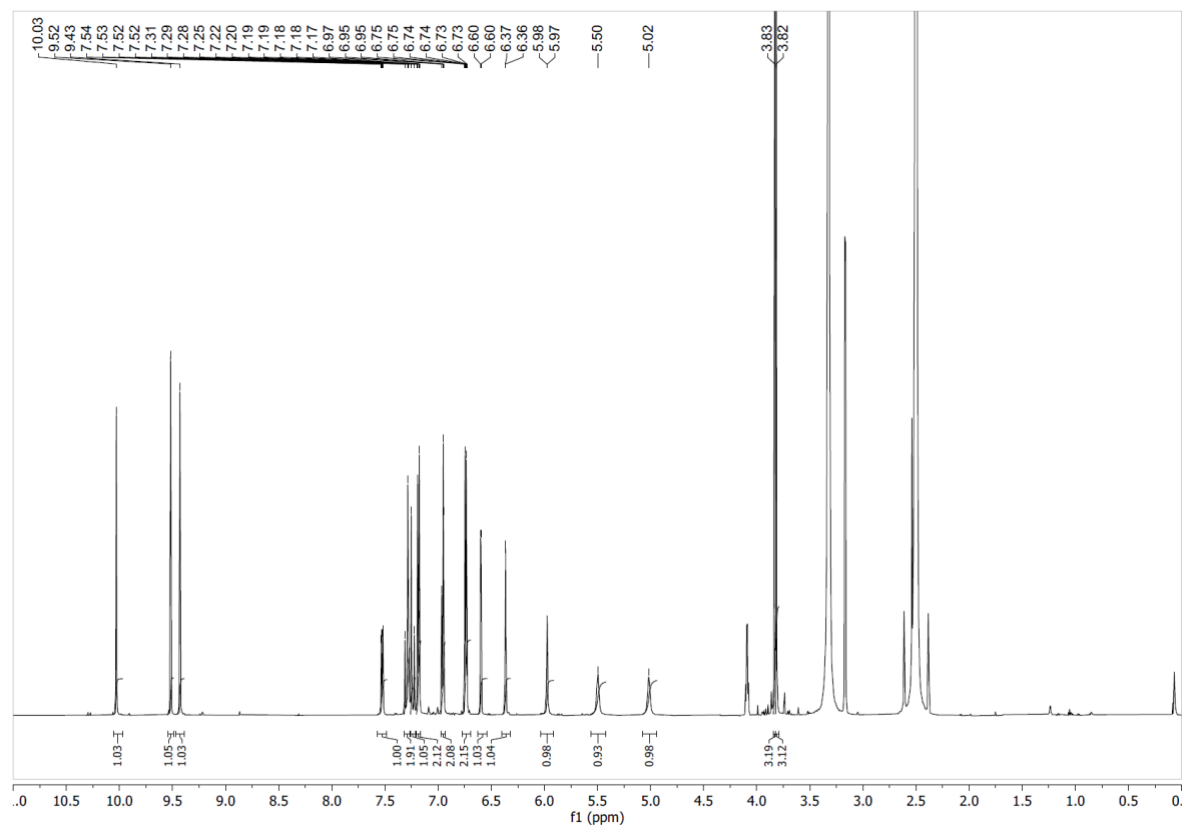

$^1\text{H}$  NMR spectrum of compound **37** in DMSO- $d_6$  at 600 MHz

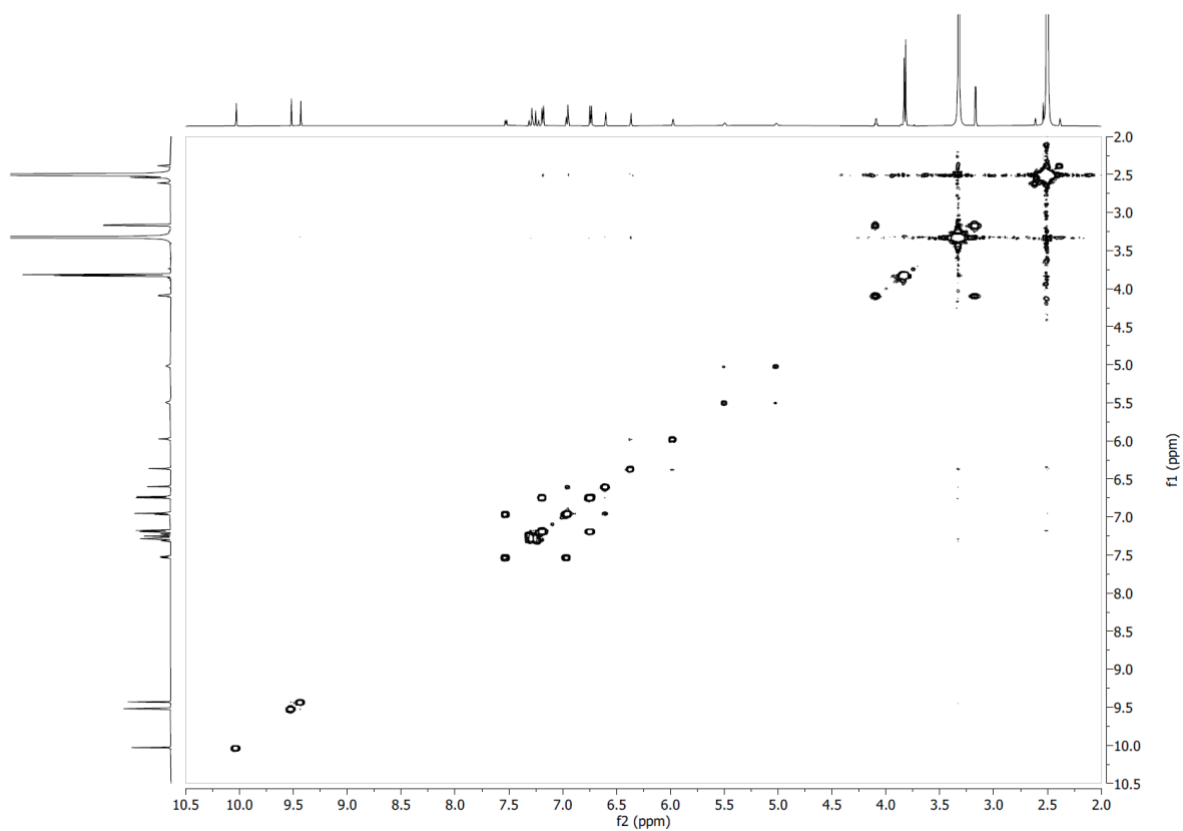

COSY NMR spectrum of compound **37** in DMSO-*d*<sub>6</sub>

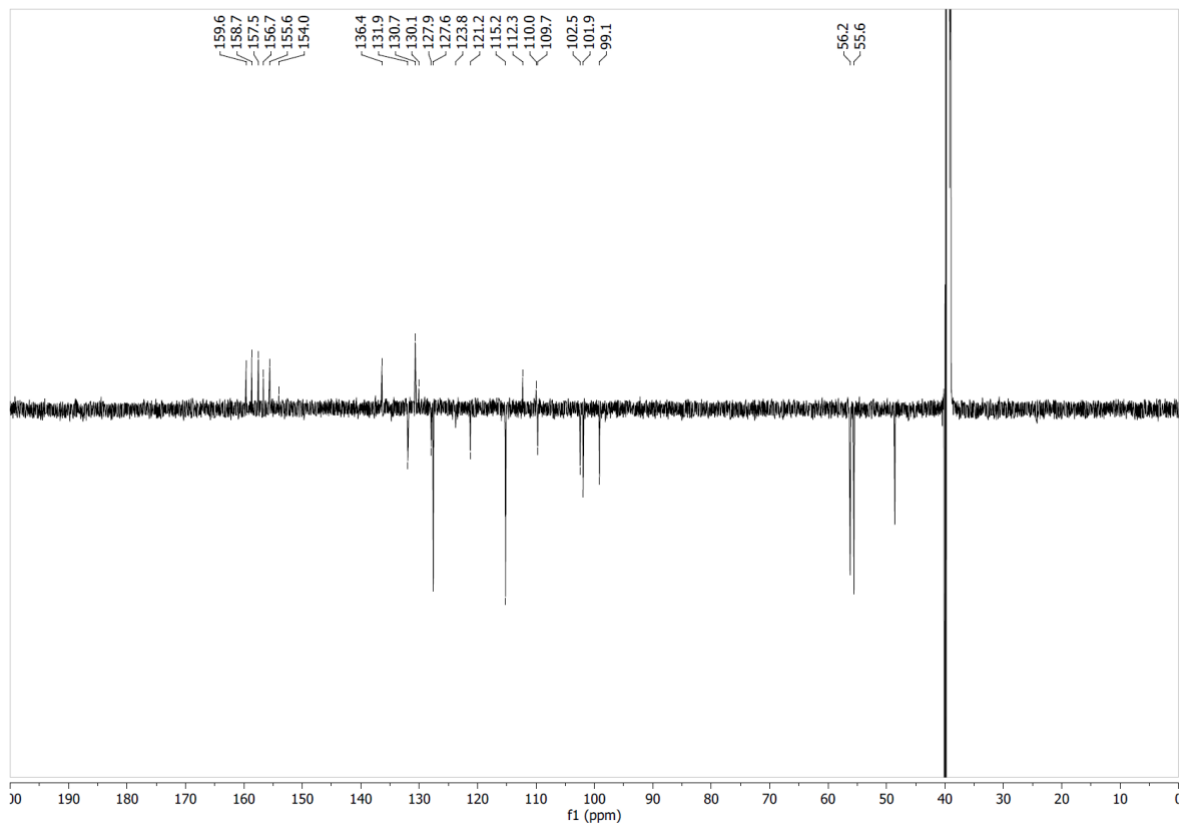

<sup>13</sup>C-DEPTQ NMR spectrum of compound **37** in DMSO-*d*<sub>6</sub> at 151 MHz



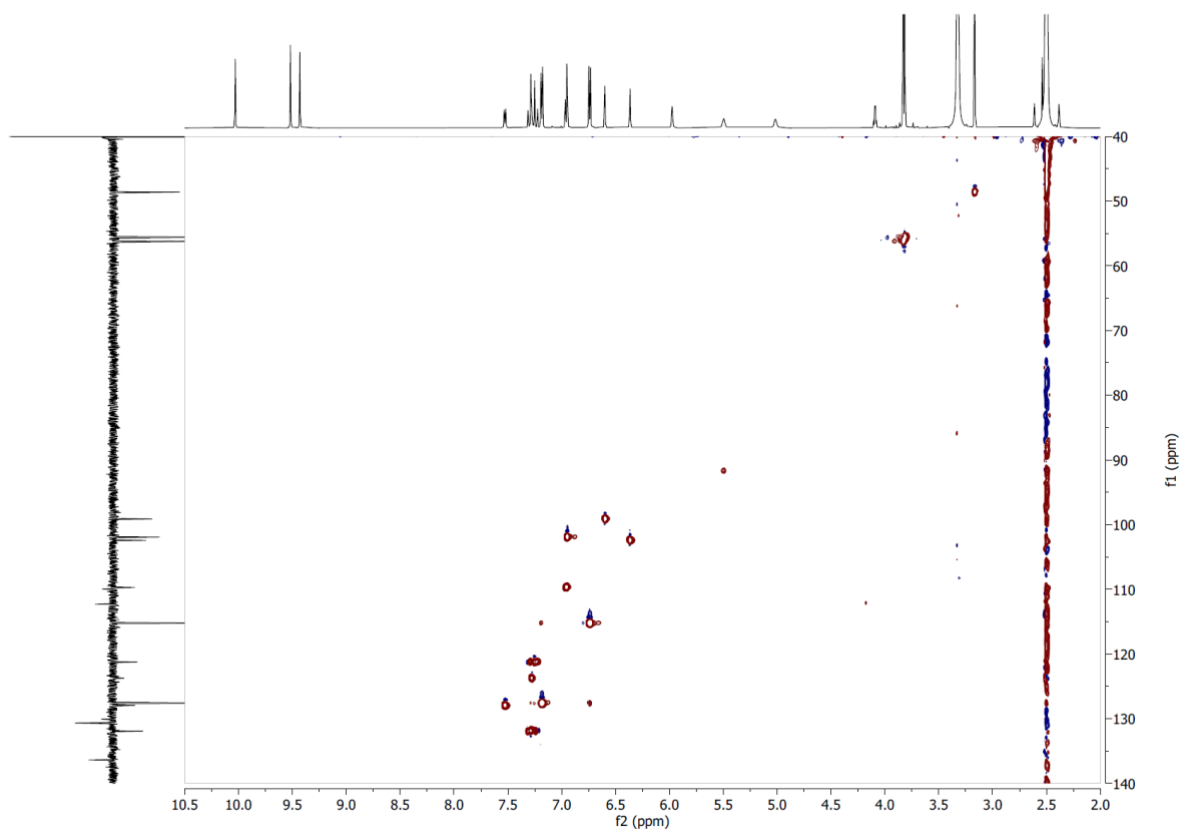

Edited HSQC NMR spectrum of compound **37** in DMSO-*d*<sub>6</sub>

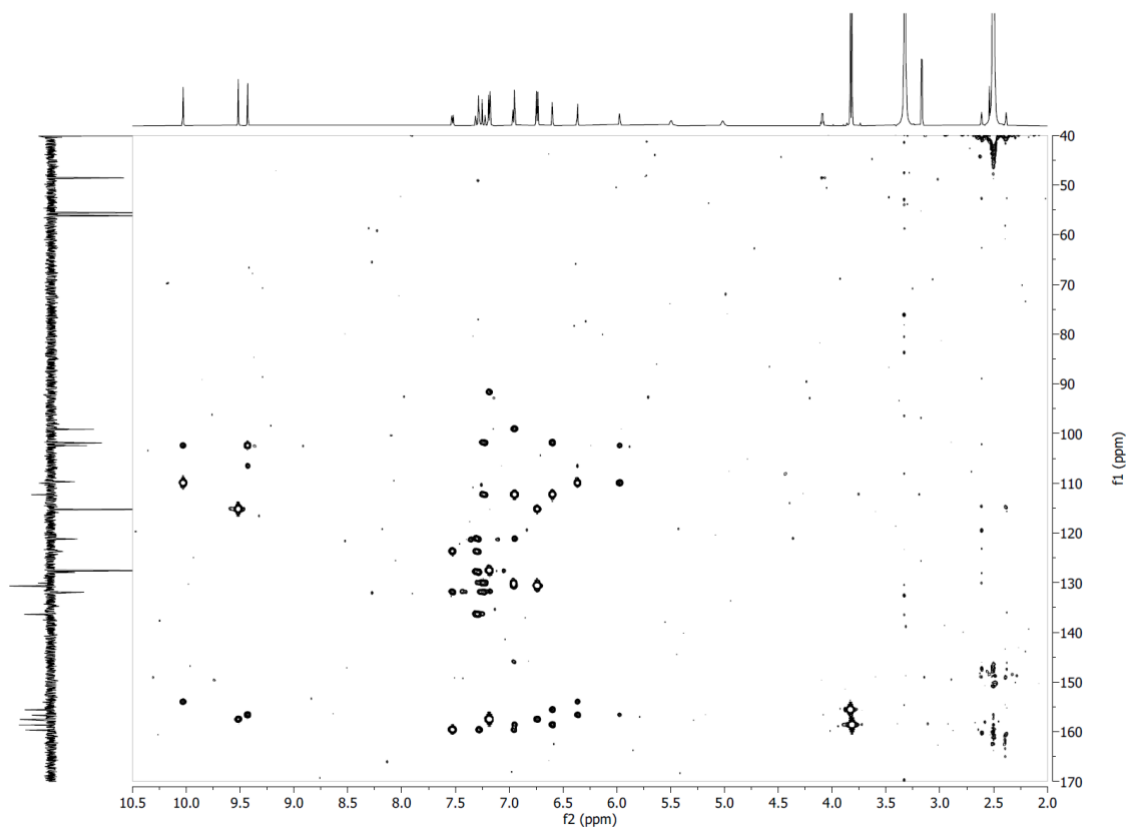

HMBC NMR spectrum of compound **37** in DMSO-*d*<sub>6</sub>

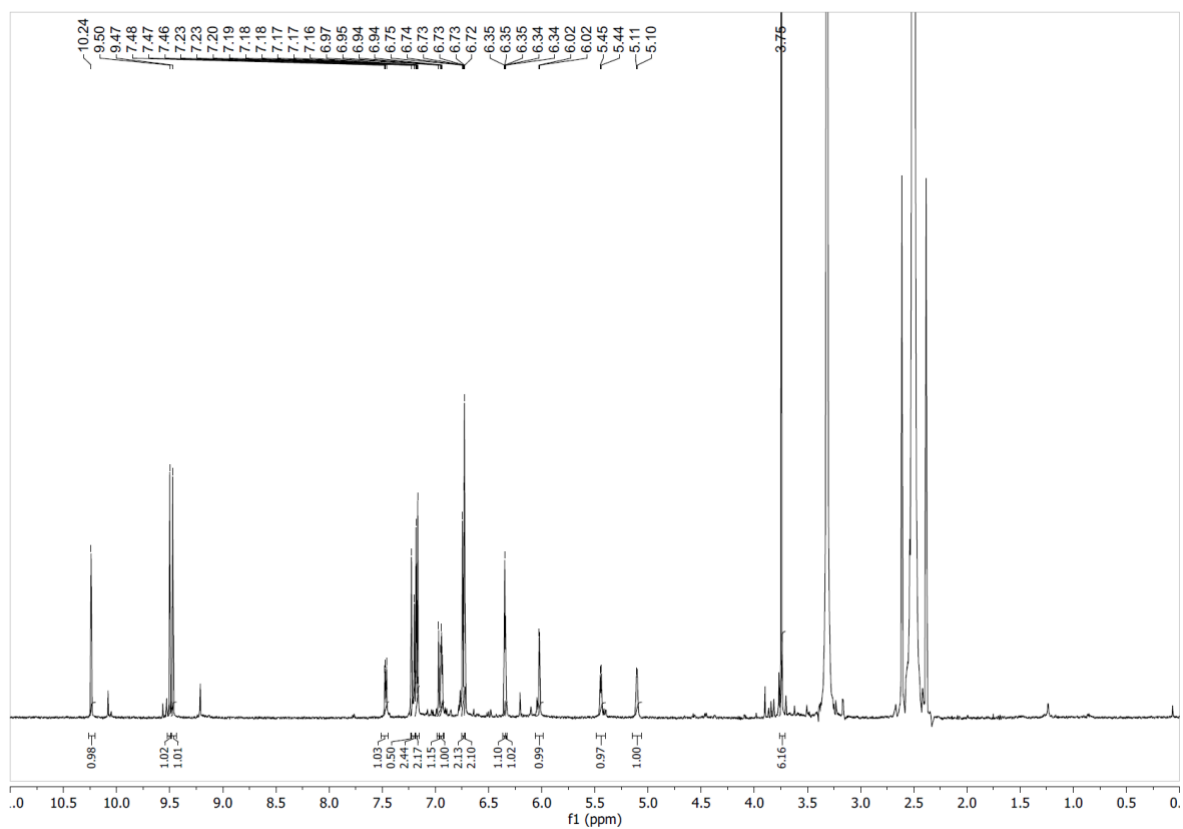

$^1\text{H}$  NMR spectrum of compound **38** in  $\text{DMSO-}d_6$  at 600 MHz

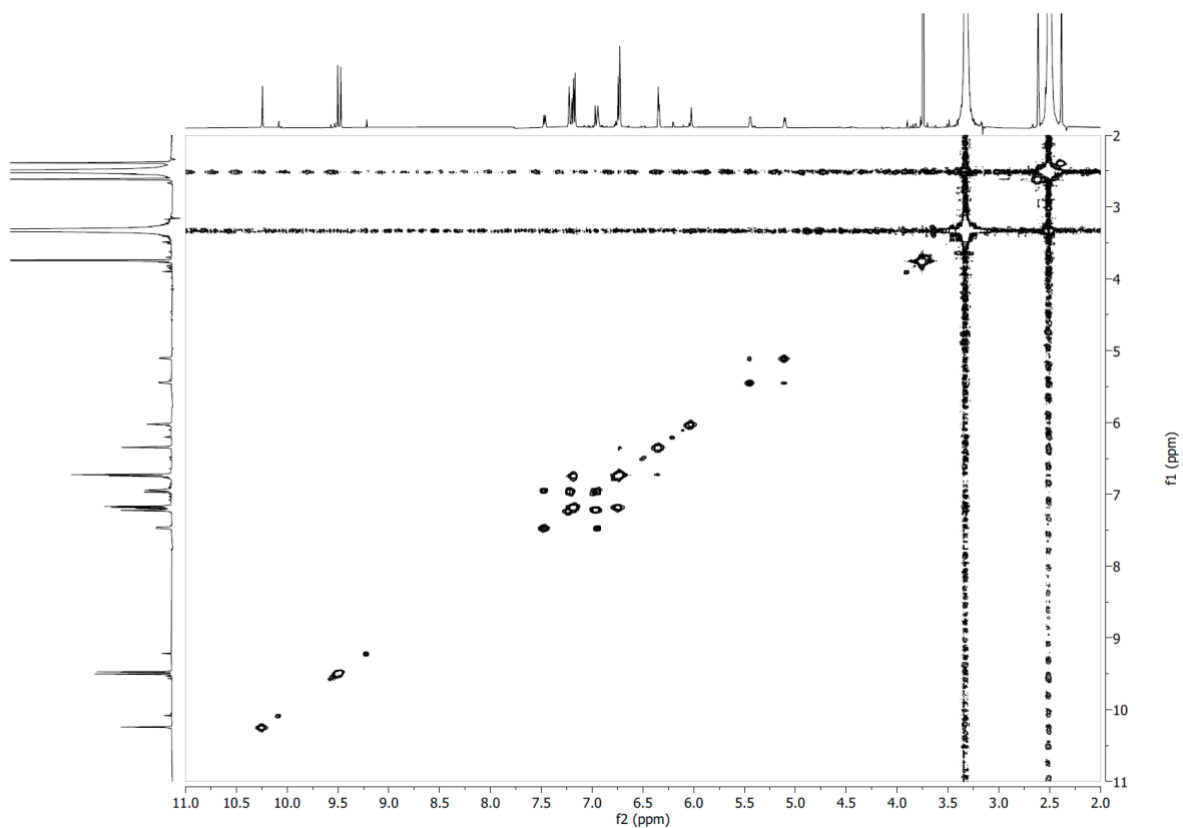

COSY NMR spectrum of compound **38** in  $\text{DMSO-}d_6$

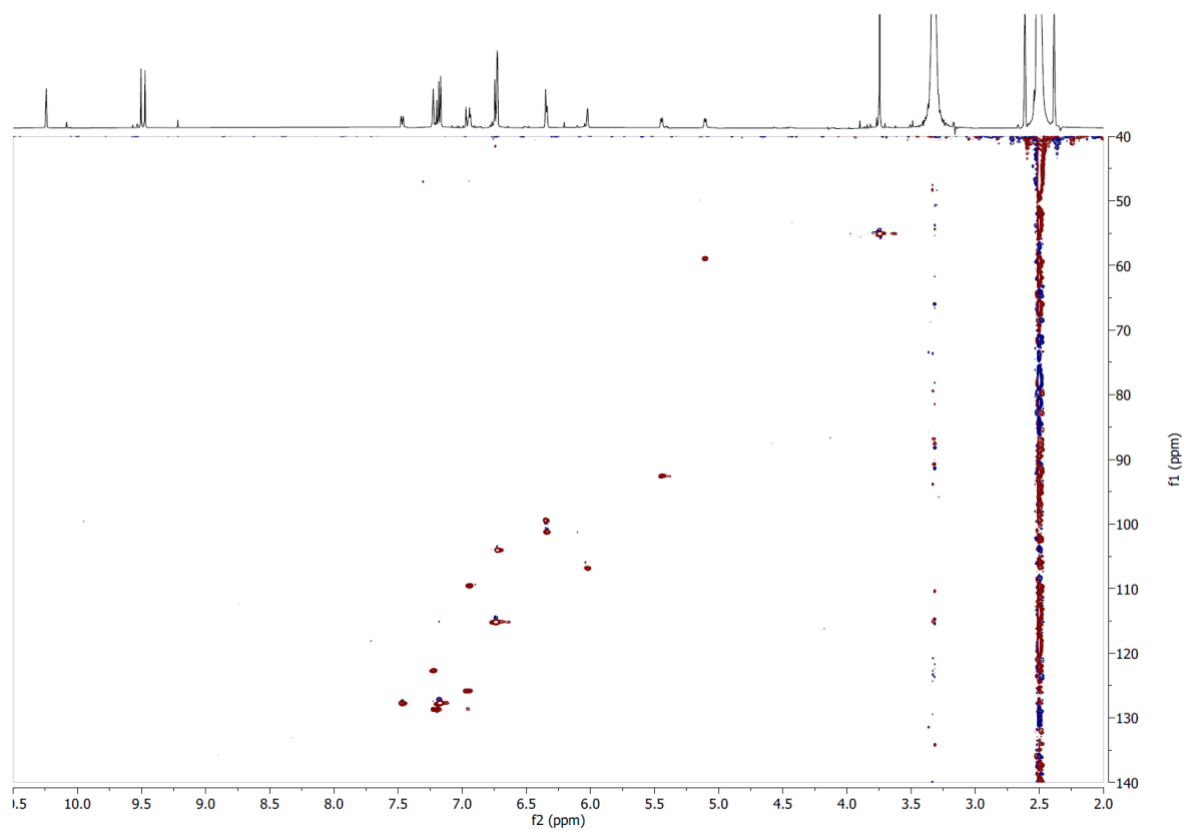

Edited HSQC NMR spectrum of compound **38** in DMSO-*d*<sub>6</sub>

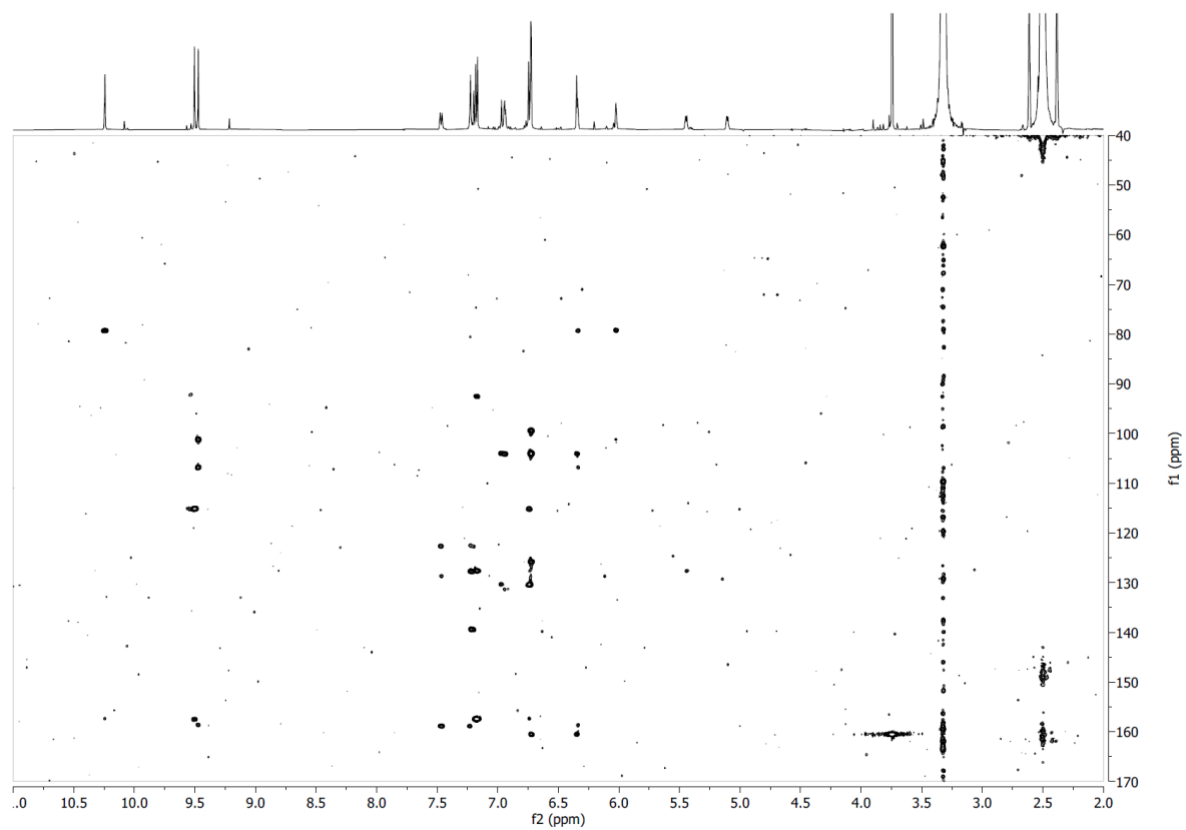

HMBC NMR spectrum of compound **38** in DMSO-*d*<sub>6</sub>

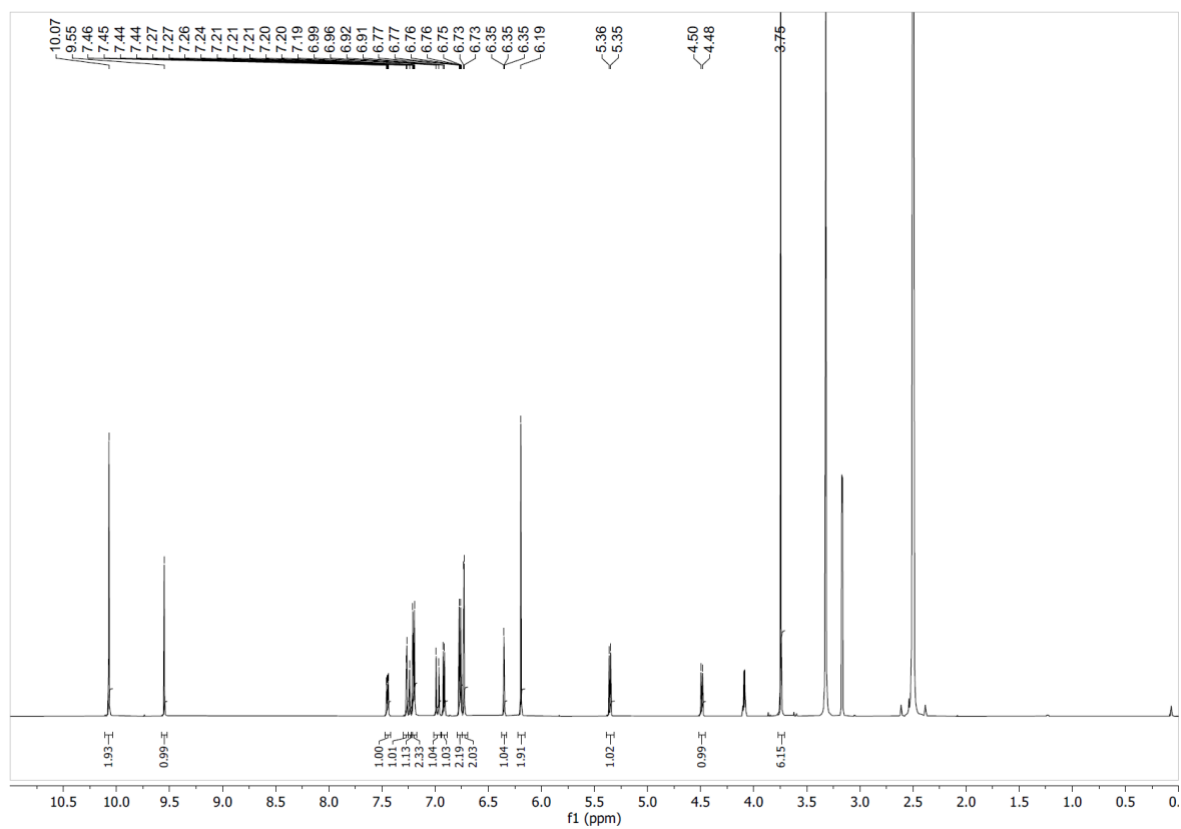

$^1\text{H}$  NMR spectrum of compound **39** in  $\text{DMSO-}d_6$  at 600 MHz

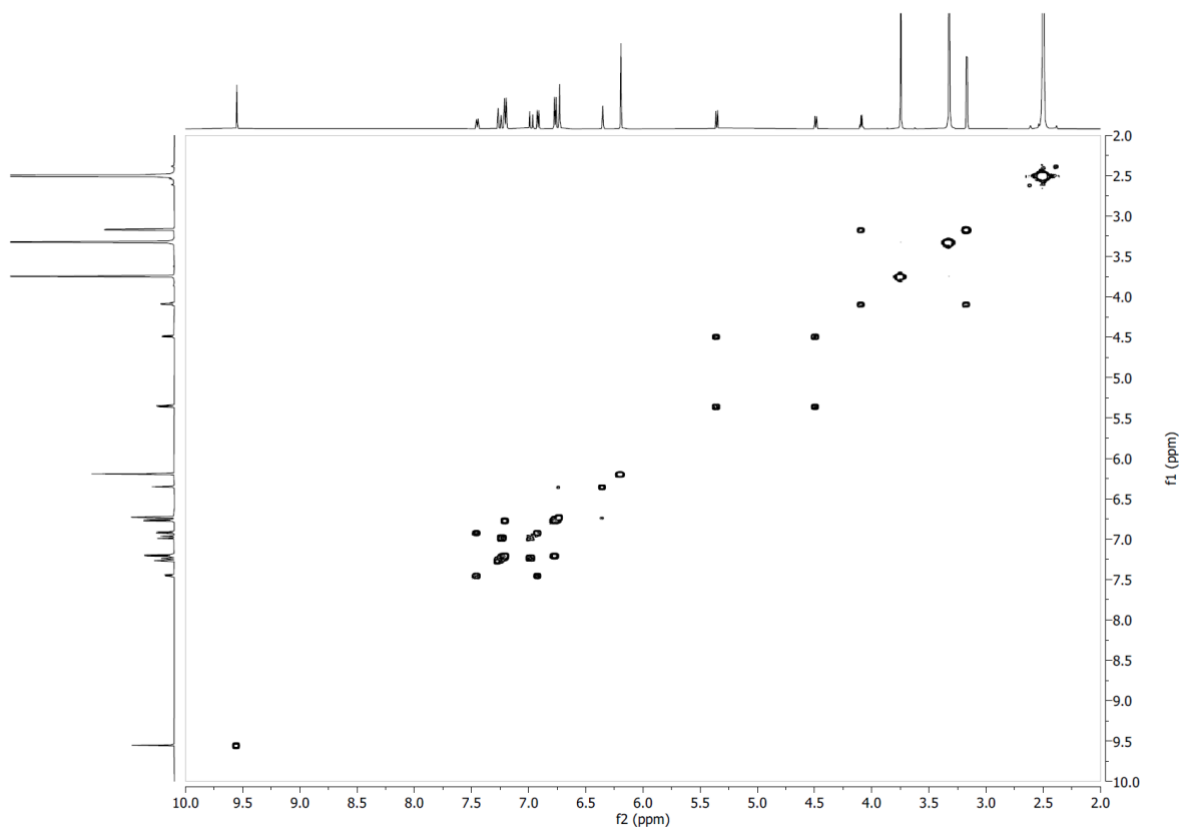

COSY NMR spectrum of compound **39** in  $\text{DMSO-}d_6$

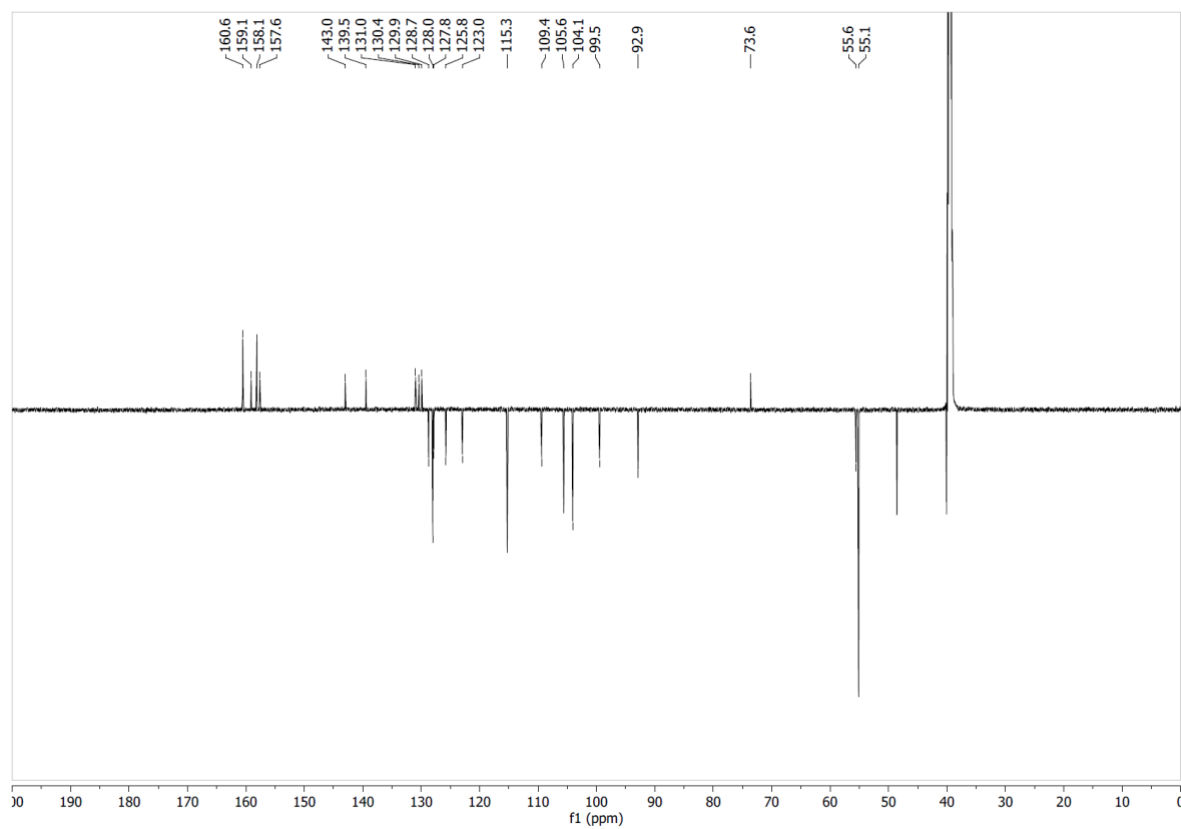

$^{13}\text{C}$ -DEPTQ NMR spectrum of compound **39** in  $\text{DMSO-}d_6$  at 151 MHz

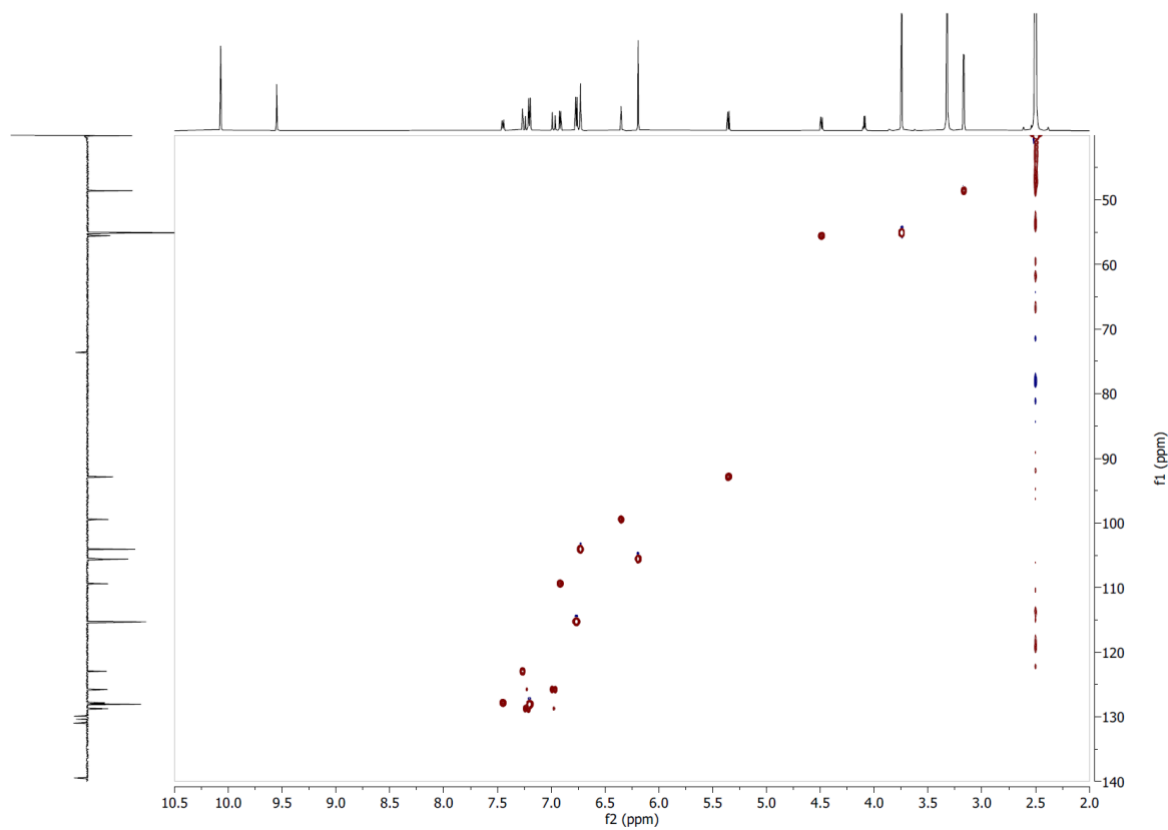

Edited HSQC NMR spectrum of compound **39** in  $\text{DMSO-}d_6$

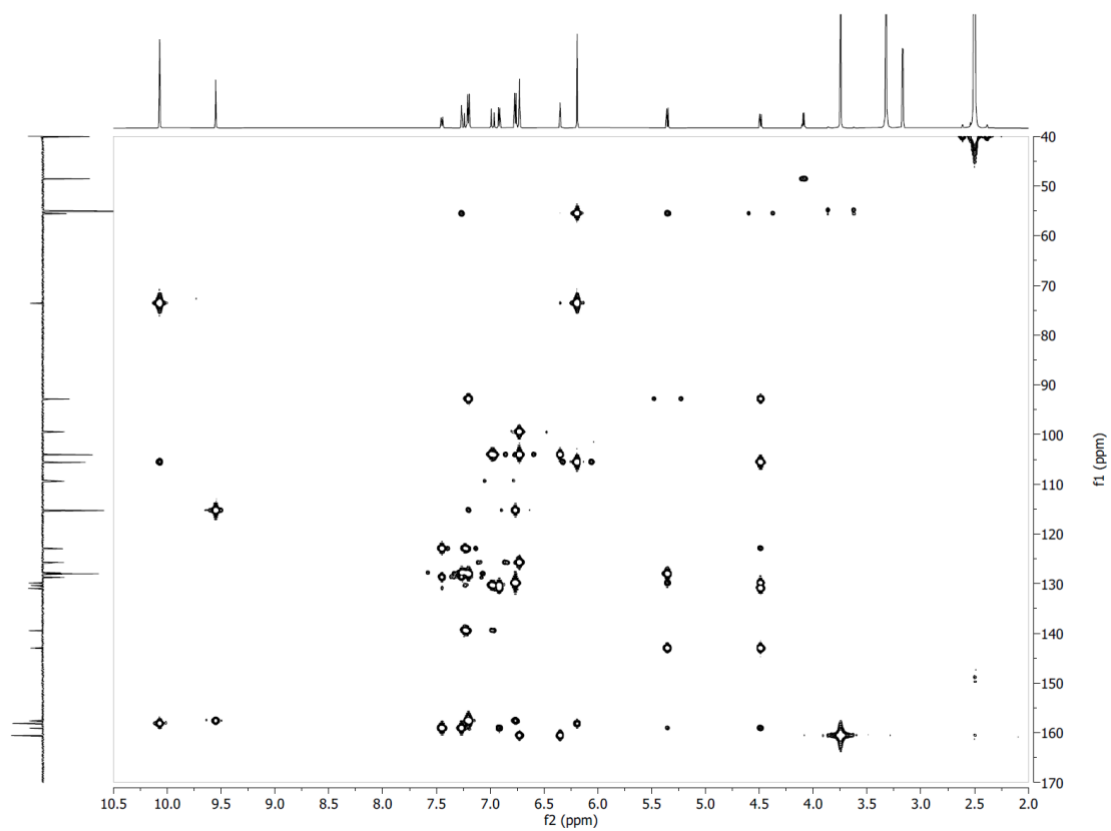

HMBC NMR spectrum of compound **39** in DMSO- $d_6$

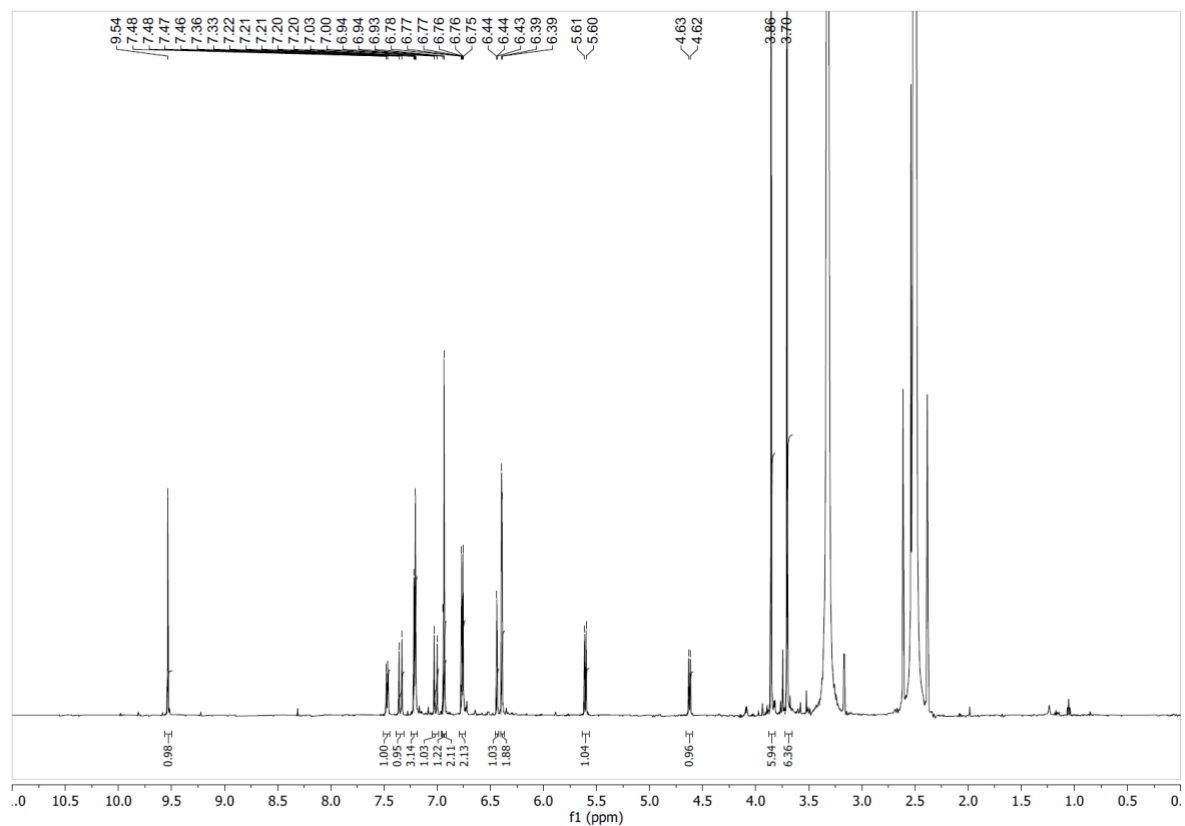

$^1\text{H}$  NMR spectrum of compound **40** in DMSO- $d_6$  at 600 MHz

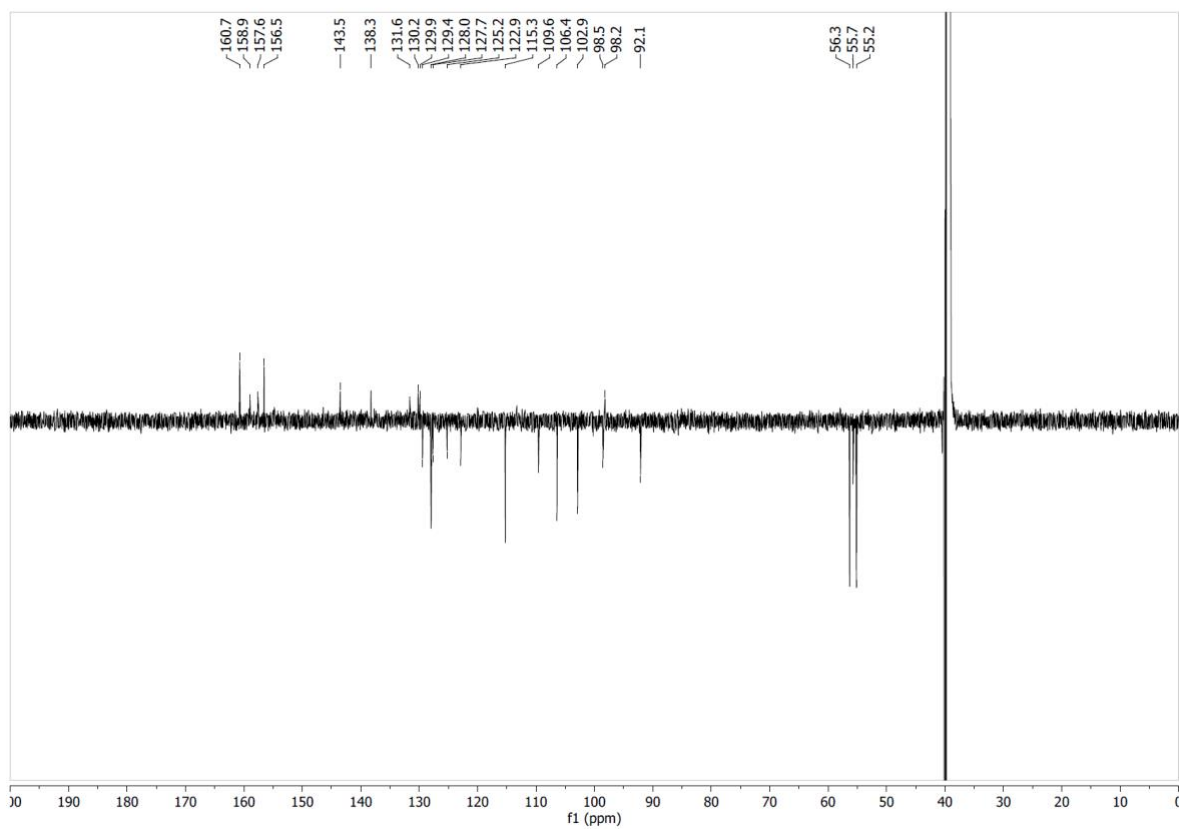

$^{13}\text{C}$ -DEPTQ NMR spectrum of compound **40** in  $\text{DMSO-}d_6$  at 151 MHz

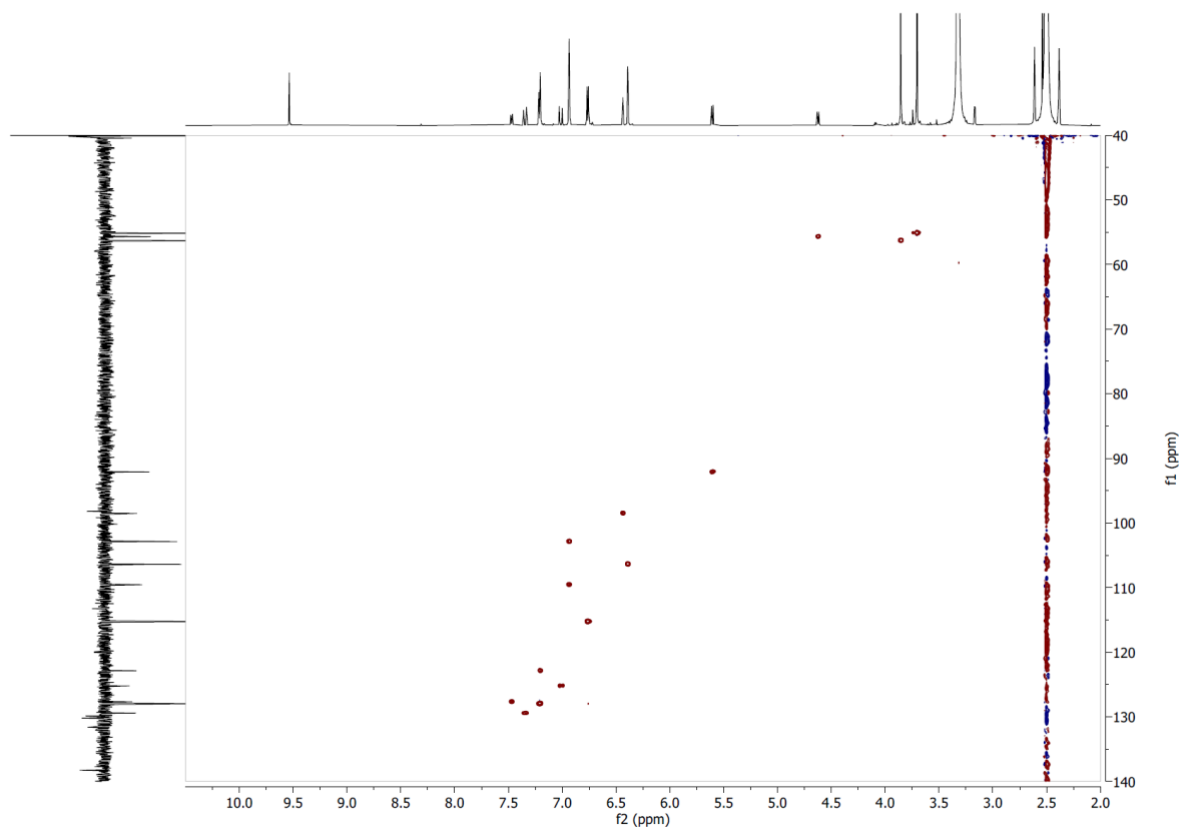

Edited HSQC NMR spectrum of compound **40** in  $\text{DMSO-}d_6$

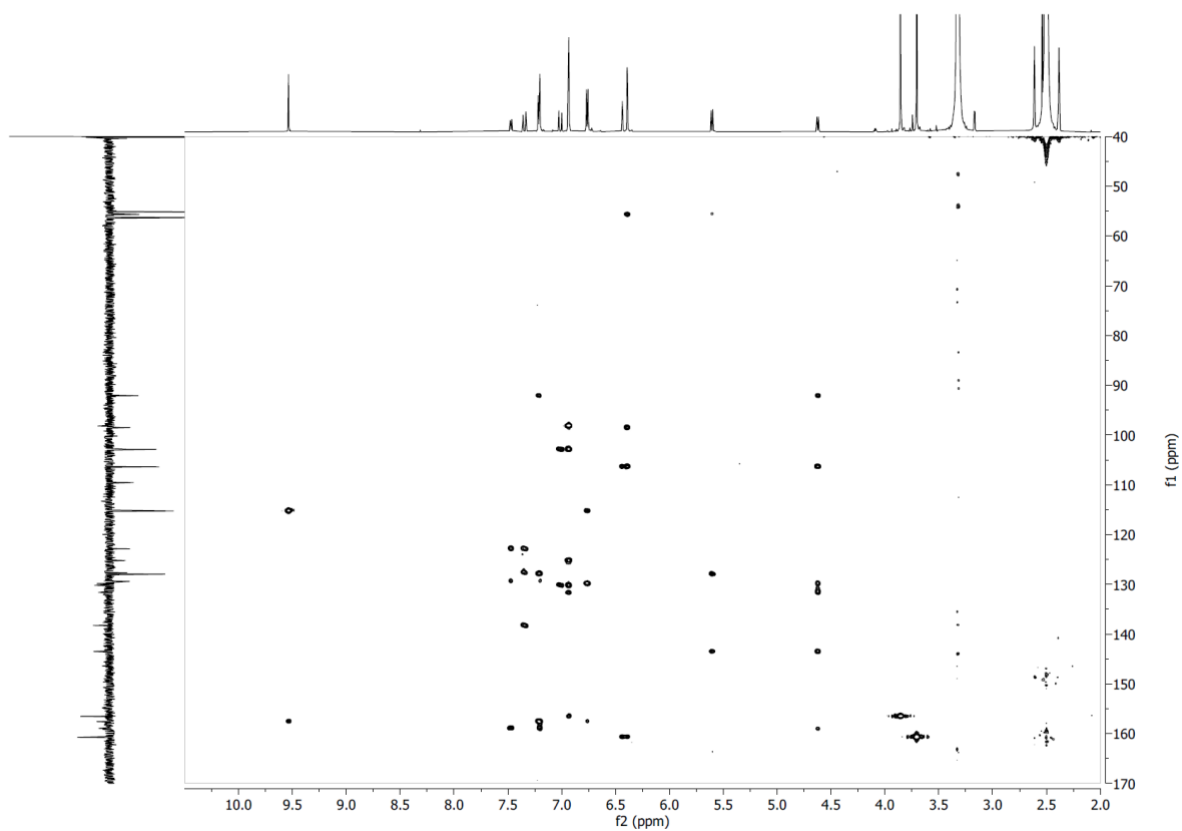

HMBC NMR spectrum of compound **40** in DMSO-*d*<sub>6</sub>

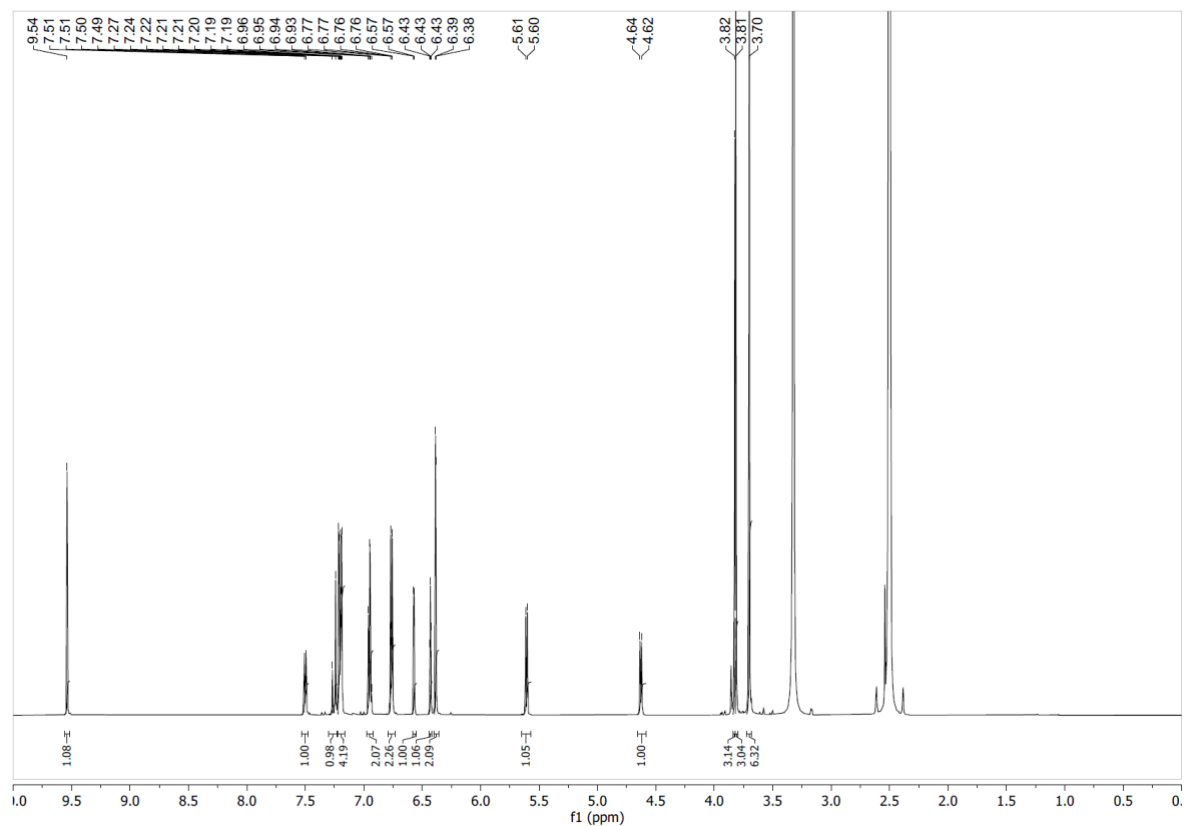

<sup>1</sup>H NMR spectrum of compound **41** in DMSO-*d*<sub>6</sub> at 600 MHz



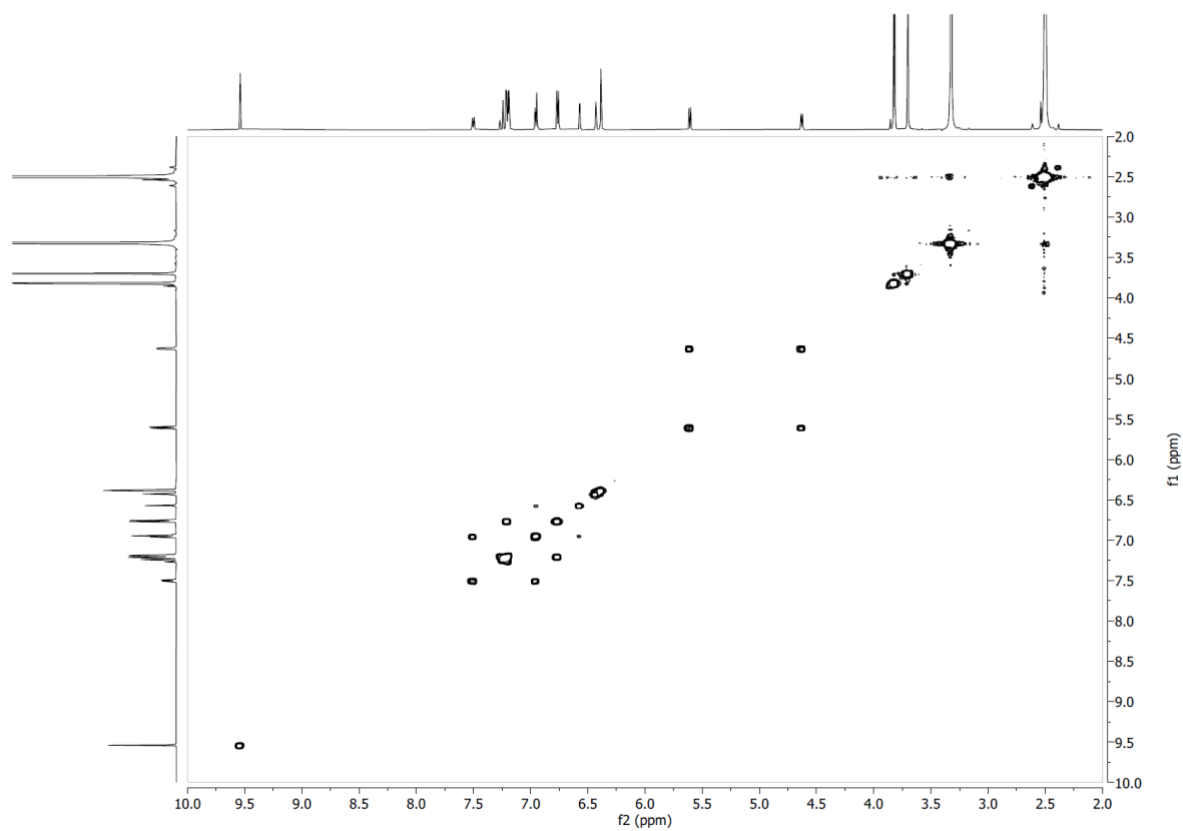

COSY NMR spectrum of compound **41** in DMSO-*d*<sub>6</sub>

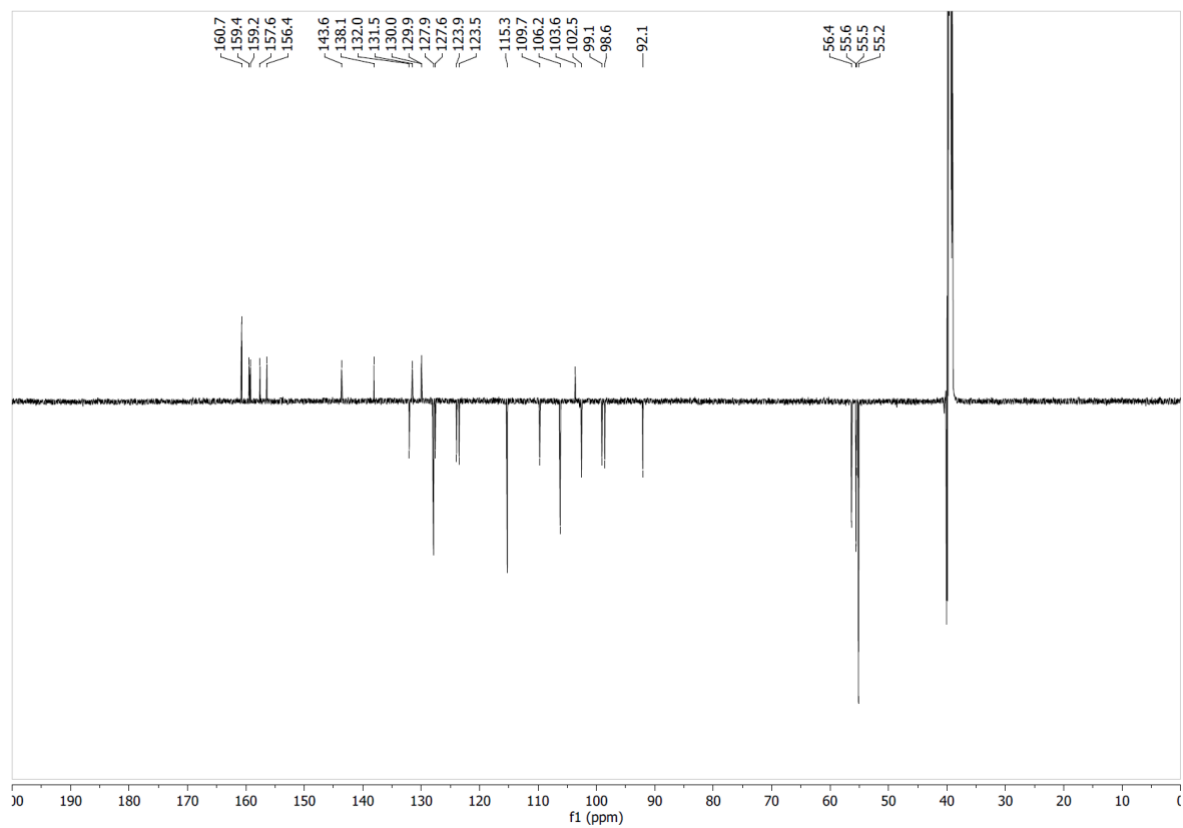

<sup>13</sup>C-DEPTQ NMR spectrum of compound **41** in DMSO-*d*<sub>6</sub> at 151 MHz

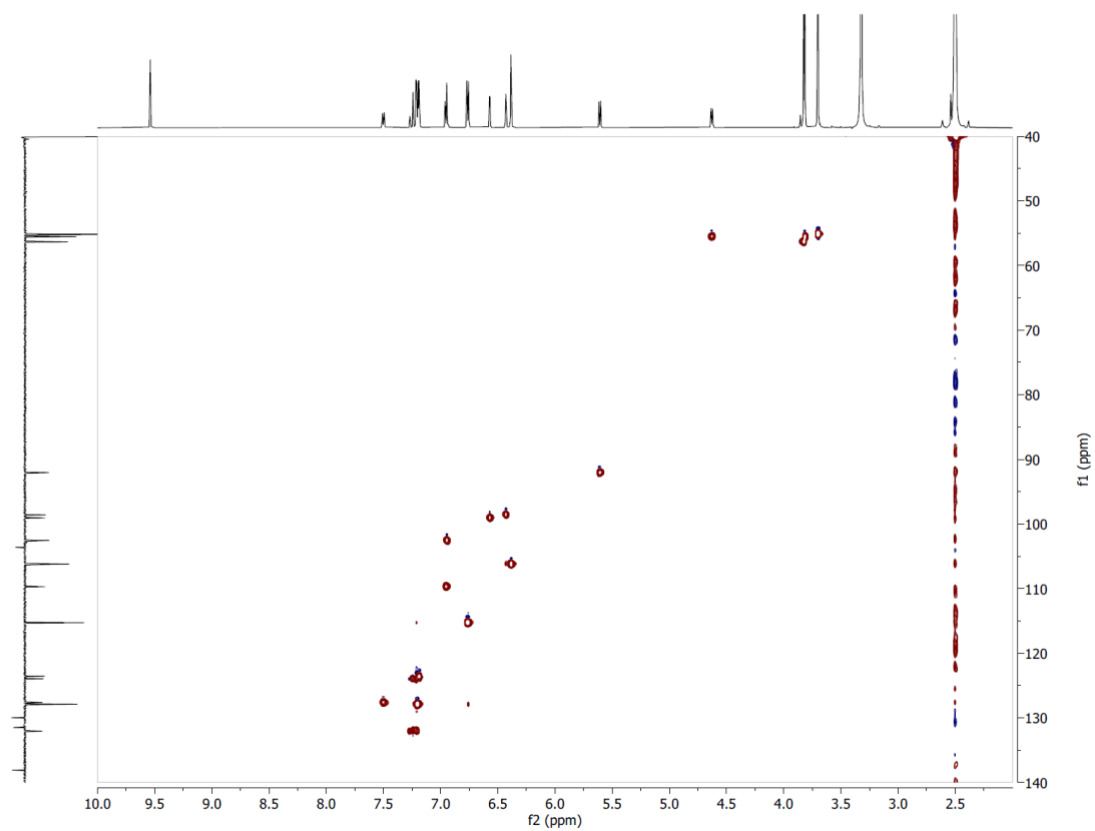

Edited HSQC NMR spectrum of compound **41** in DMSO-*d*<sub>6</sub>

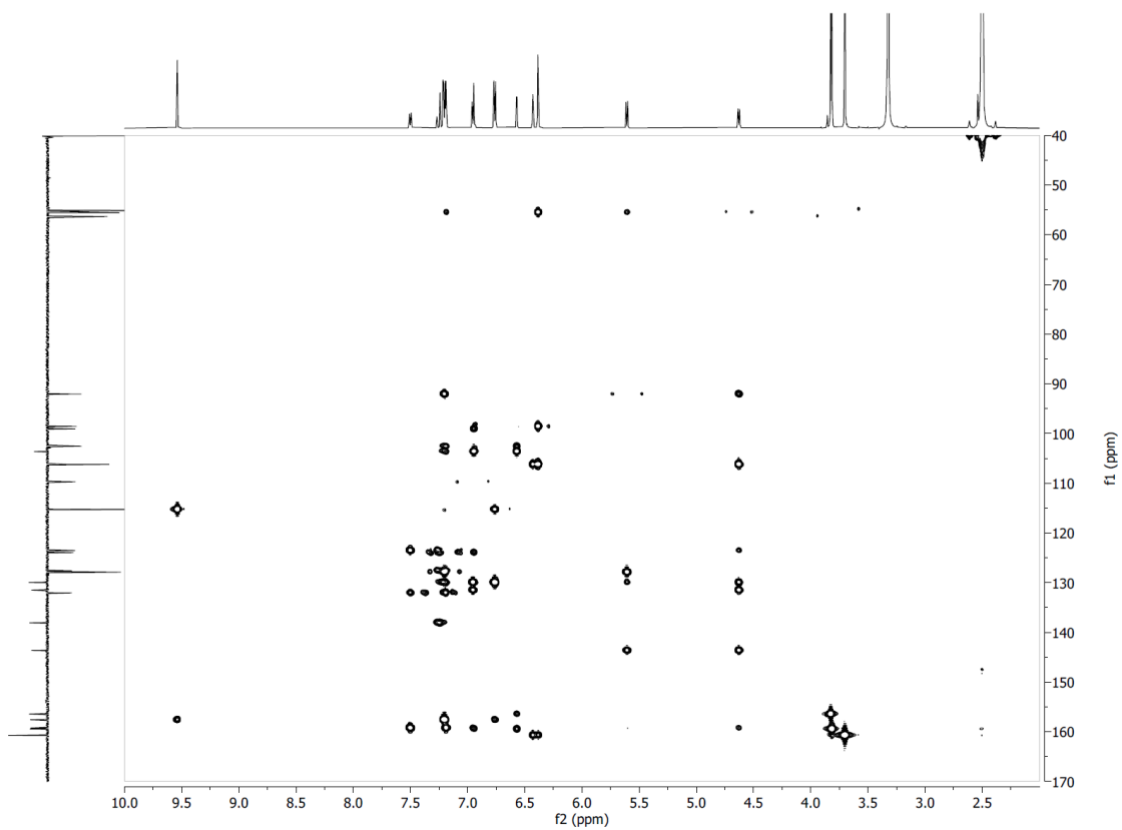

HMBC NMR spectrum of compound **41** in DMSO-*d*<sub>6</sub>

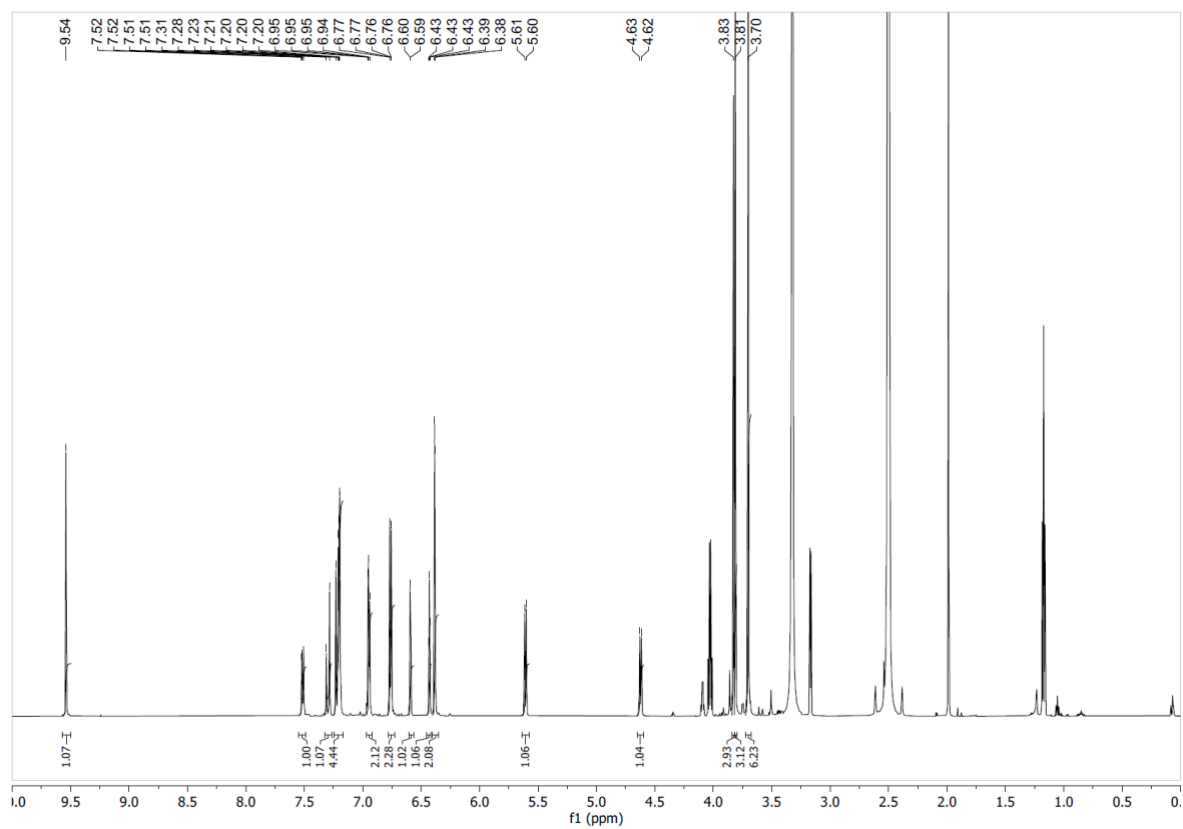

$^1\text{H}$  NMR spectrum of compound **42** in  $\text{DMSO-}d_6$  at 600 MHz

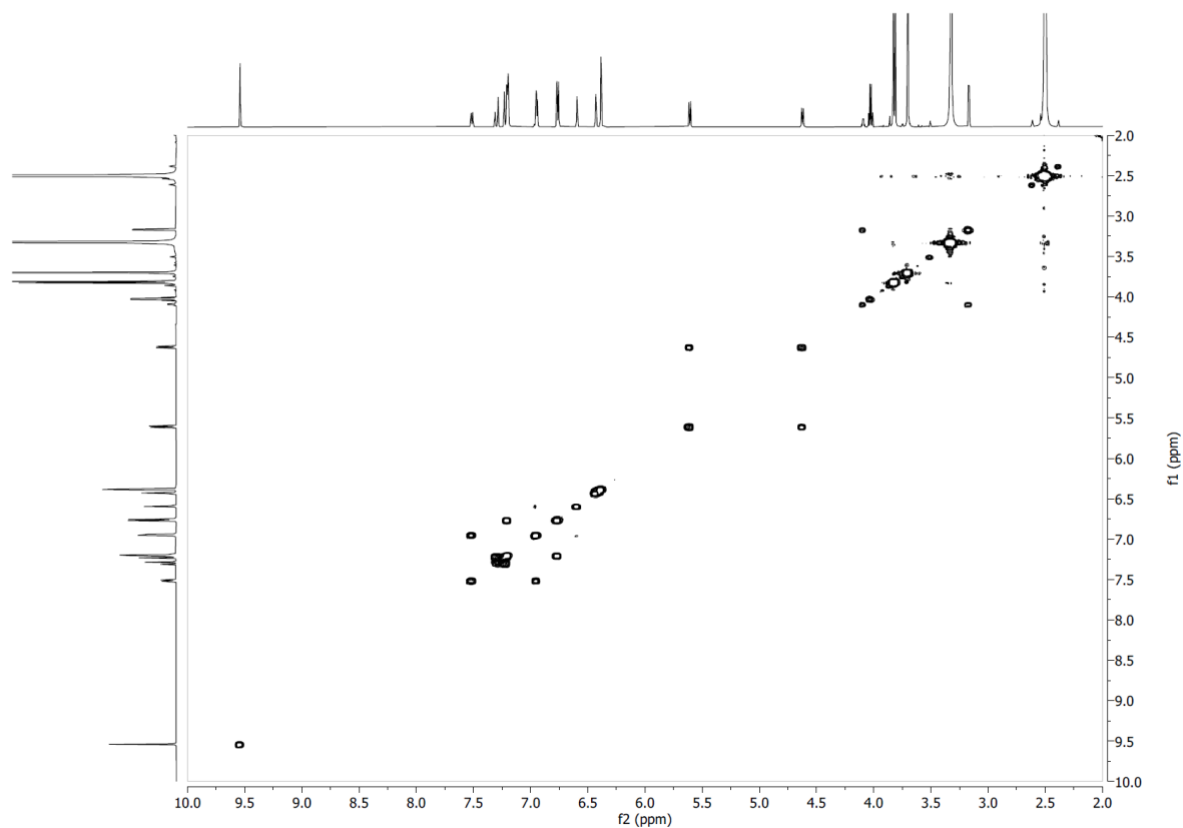

COSY NMR spectrum of compound **42** in  $\text{DMSO-}d_6$

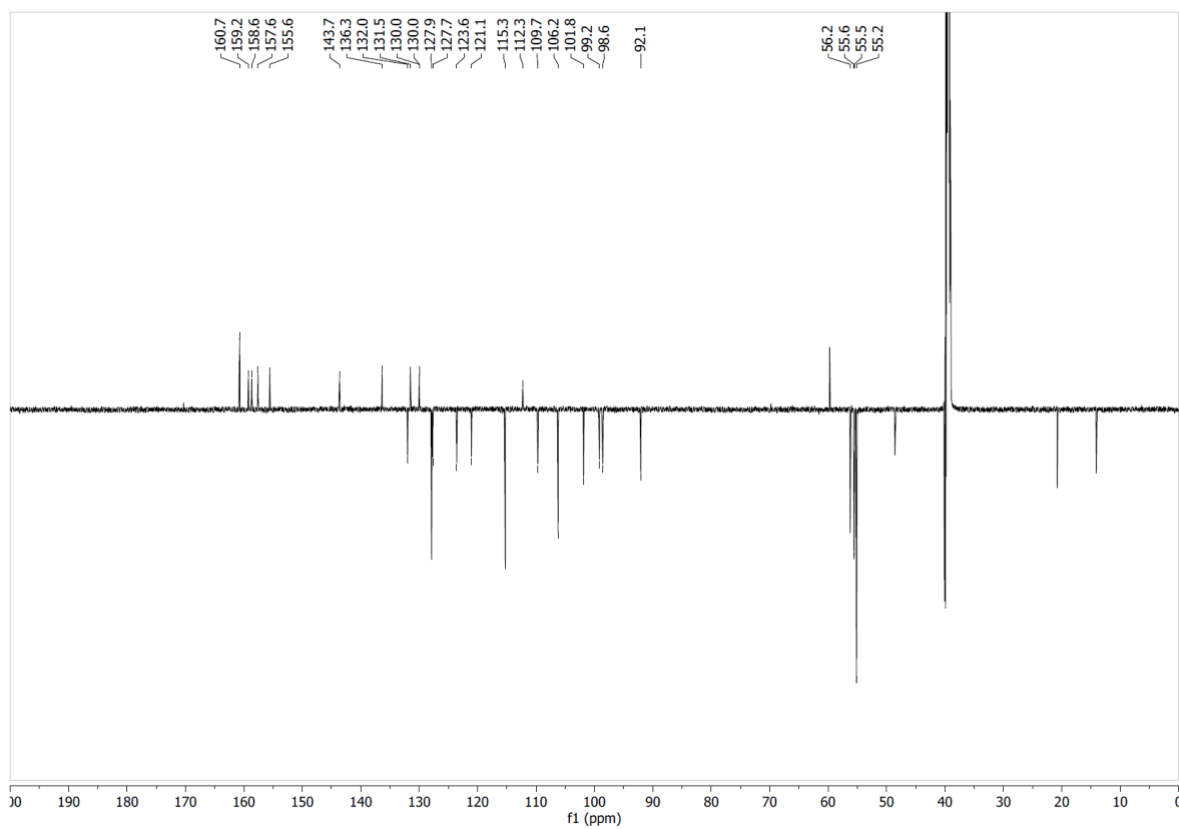

$^{13}\text{C}$ -DEPTQ NMR spectrum of compound **42** in  $\text{DMSO-}d_6$  at 151 MHz

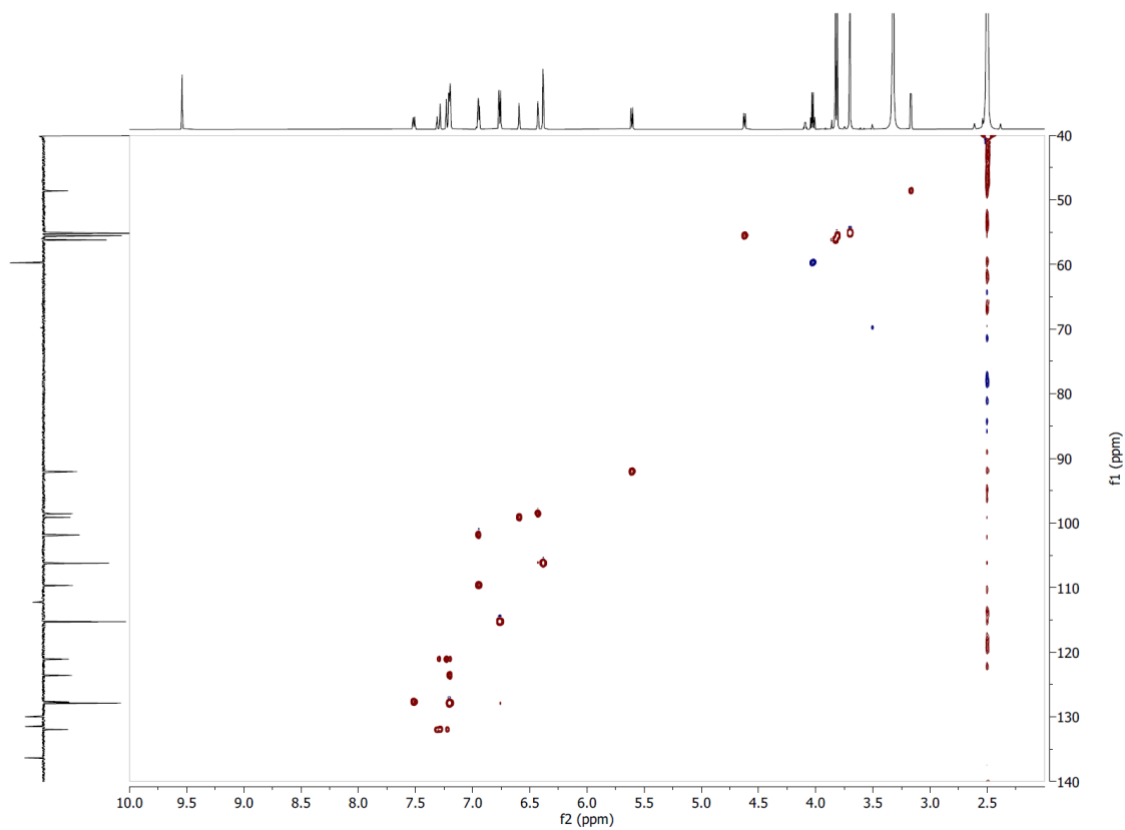

Edited HSQC NMR spectrum of compound **42** in  $\text{DMSO-}d_6$

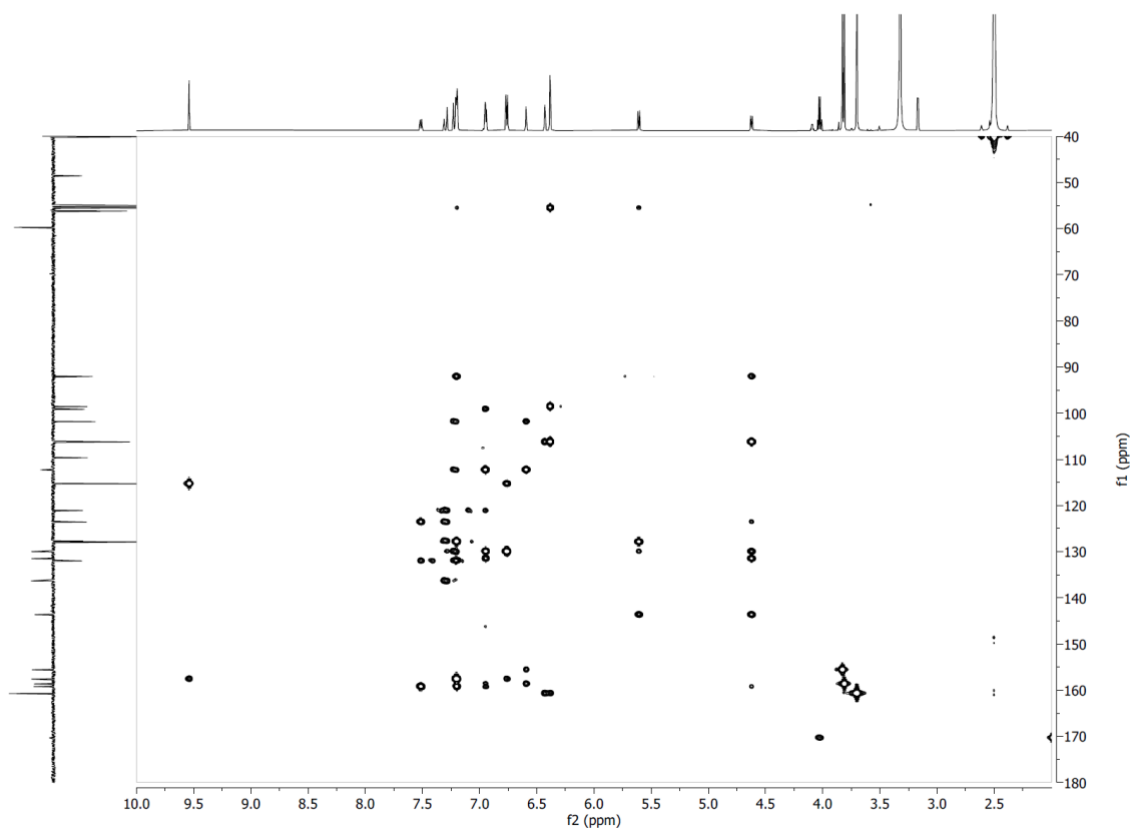

HMBC NMR spectrum of compound **42** in DMSO-*d*<sub>6</sub>

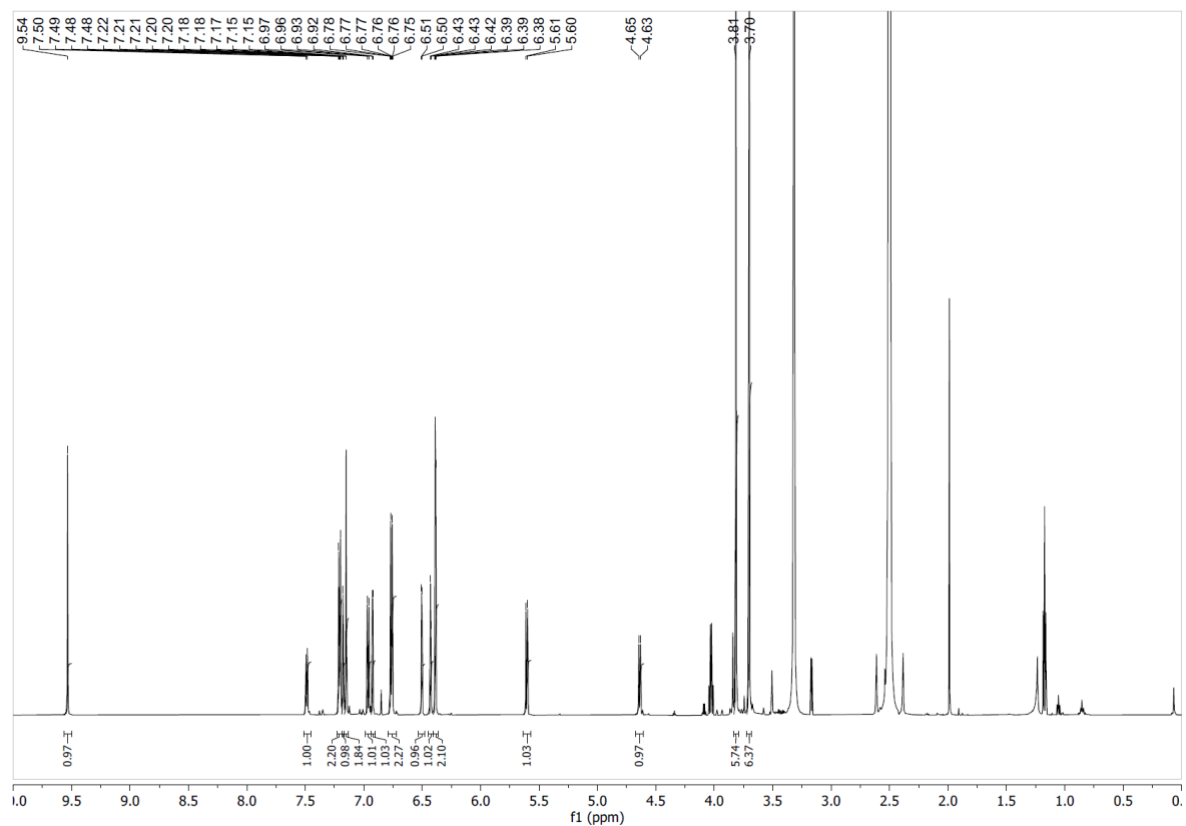

<sup>1</sup>H NMR spectrum of compound **43** in DMSO-*d*<sub>6</sub> at 600 MHz

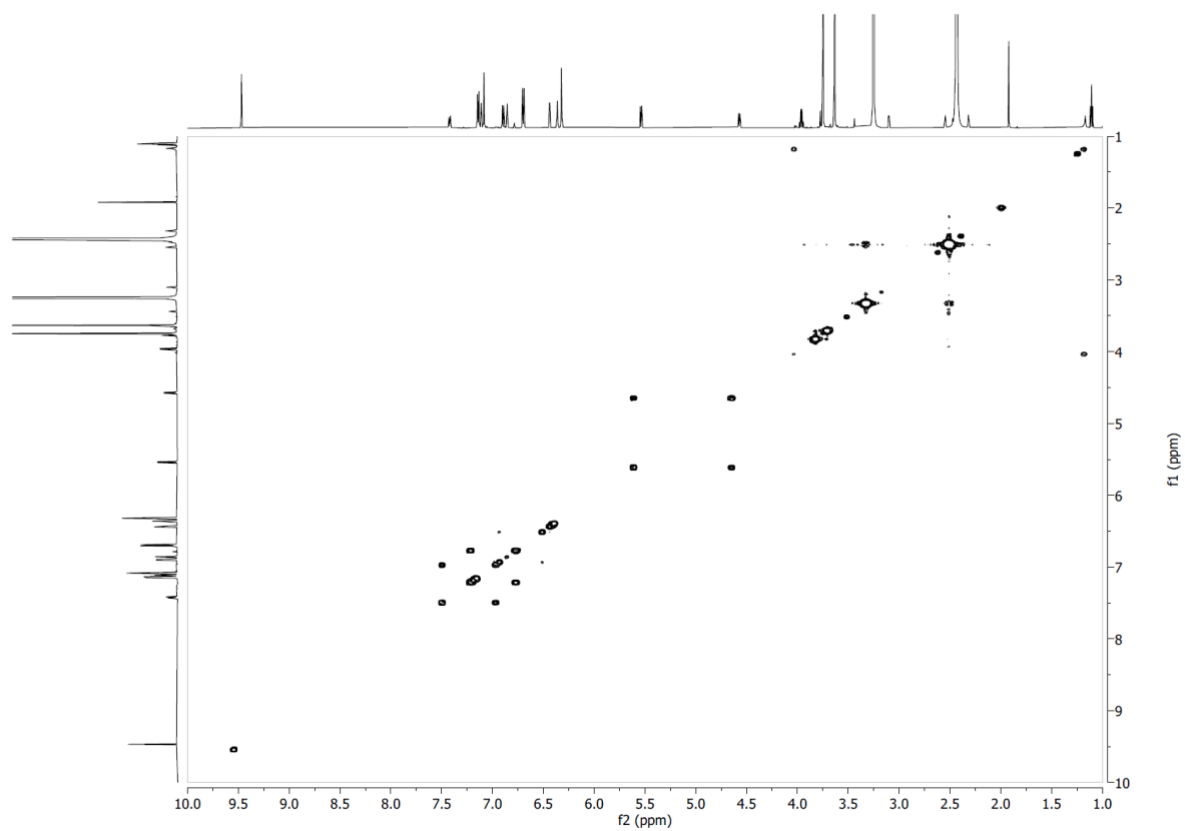

COSY NMR spectrum of compound **43** in DMSO-*d*<sub>6</sub>

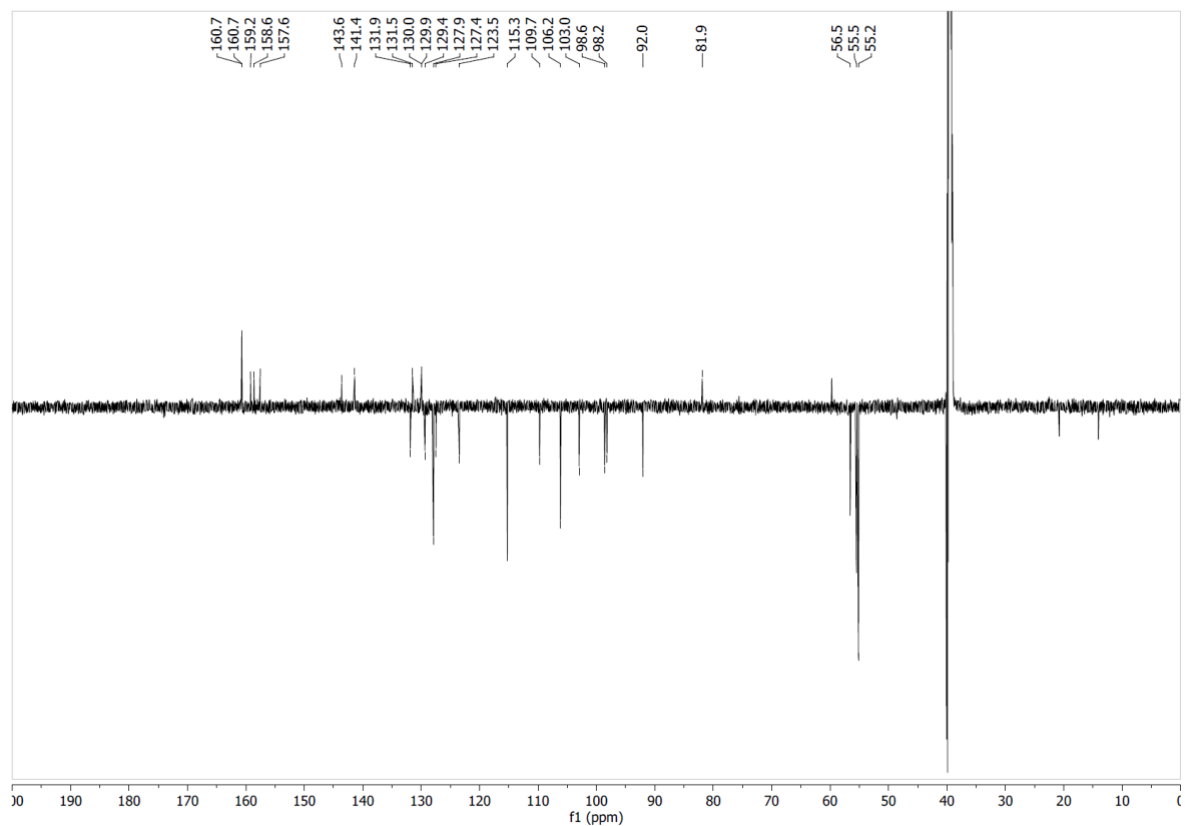

<sup>13</sup>C-DEPTQ NMR spectrum of compound **43** in DMSO-*d*<sub>6</sub> at 151 MHz

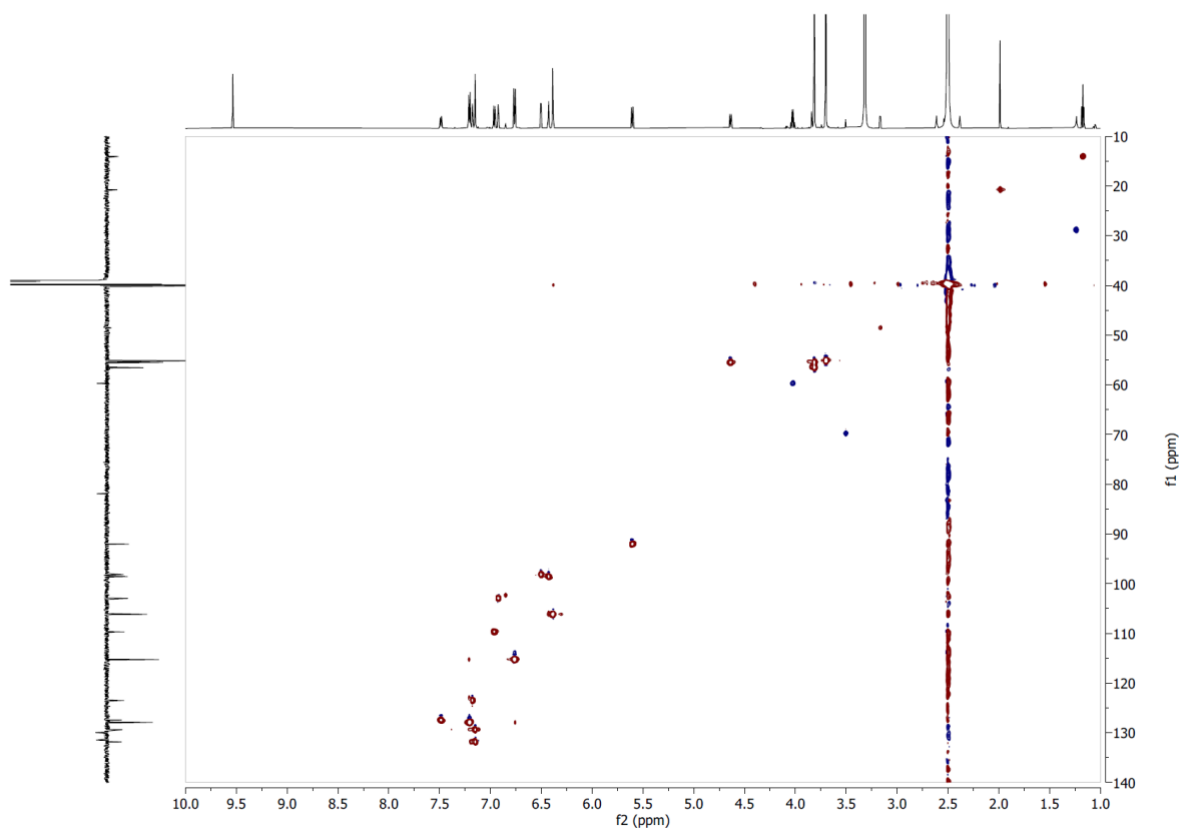

Edited HSQC NMR spectrum of compound **43** in DMSO- $d_6$

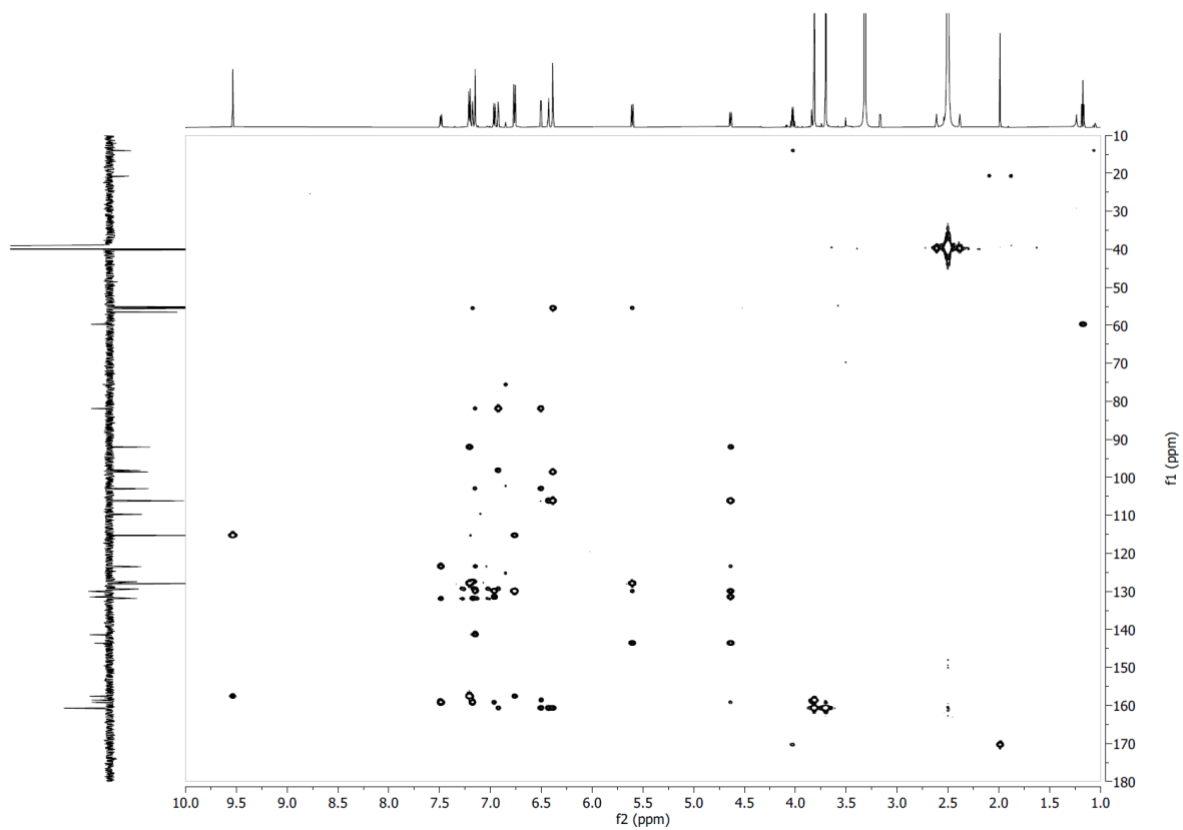

HMBC NMR spectrum of compound **43** in DMSO- $d_6$

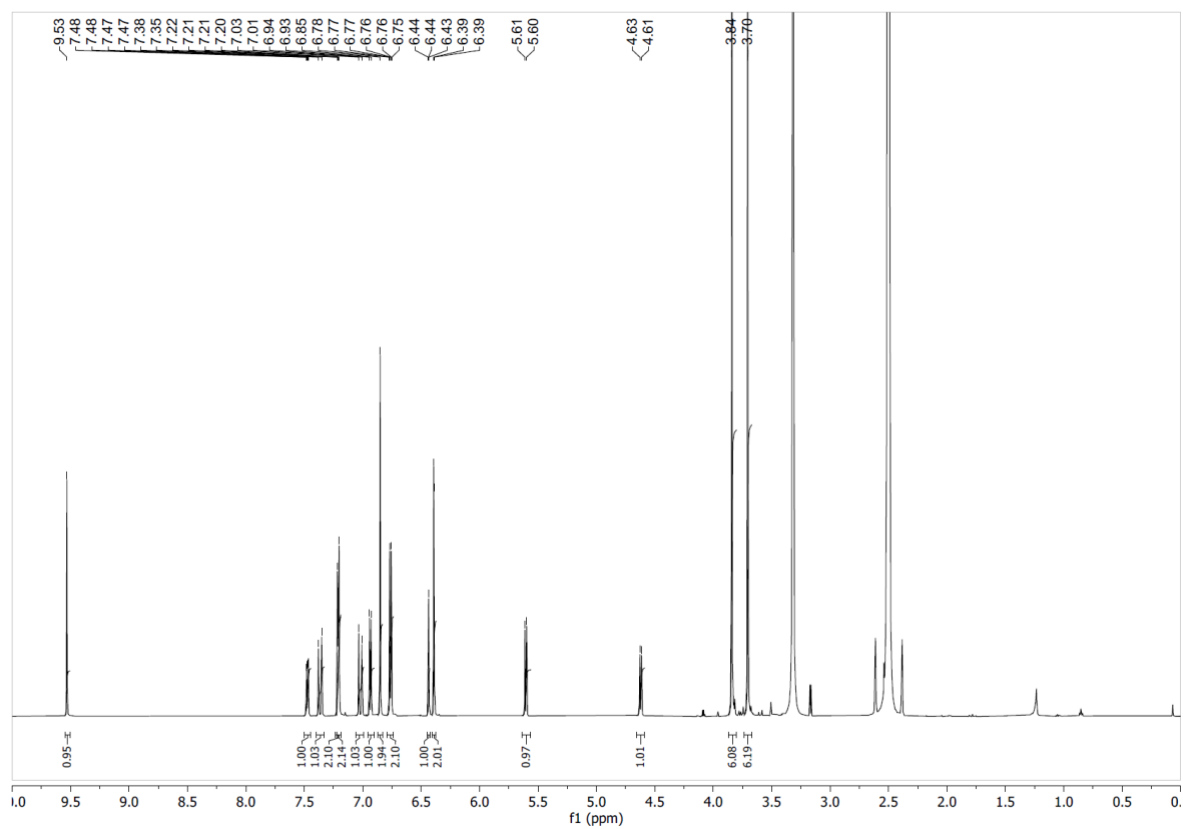

<sup>1</sup>H NMR spectrum of compound **44** in DMSO-*d*<sub>6</sub> at 600 MHz

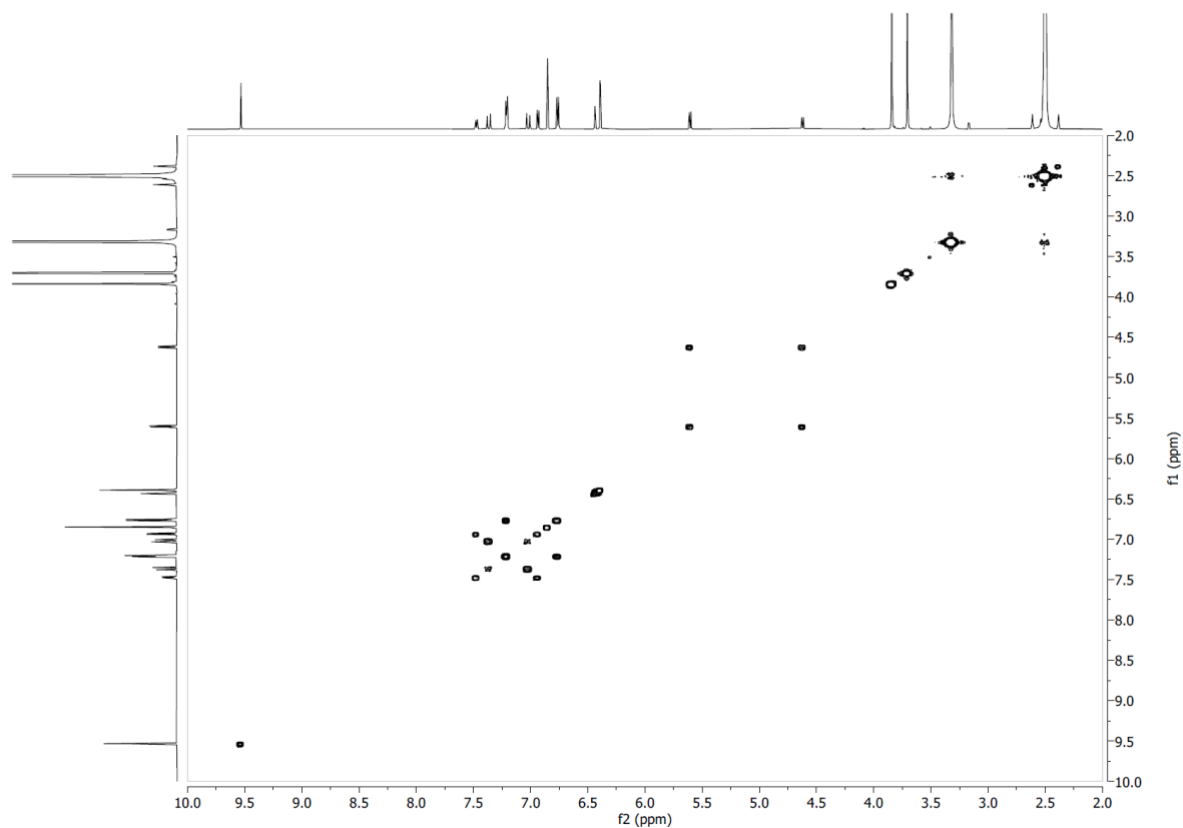

COSY NMR spectrum of compound **44** in DMSO-*d*<sub>6</sub>



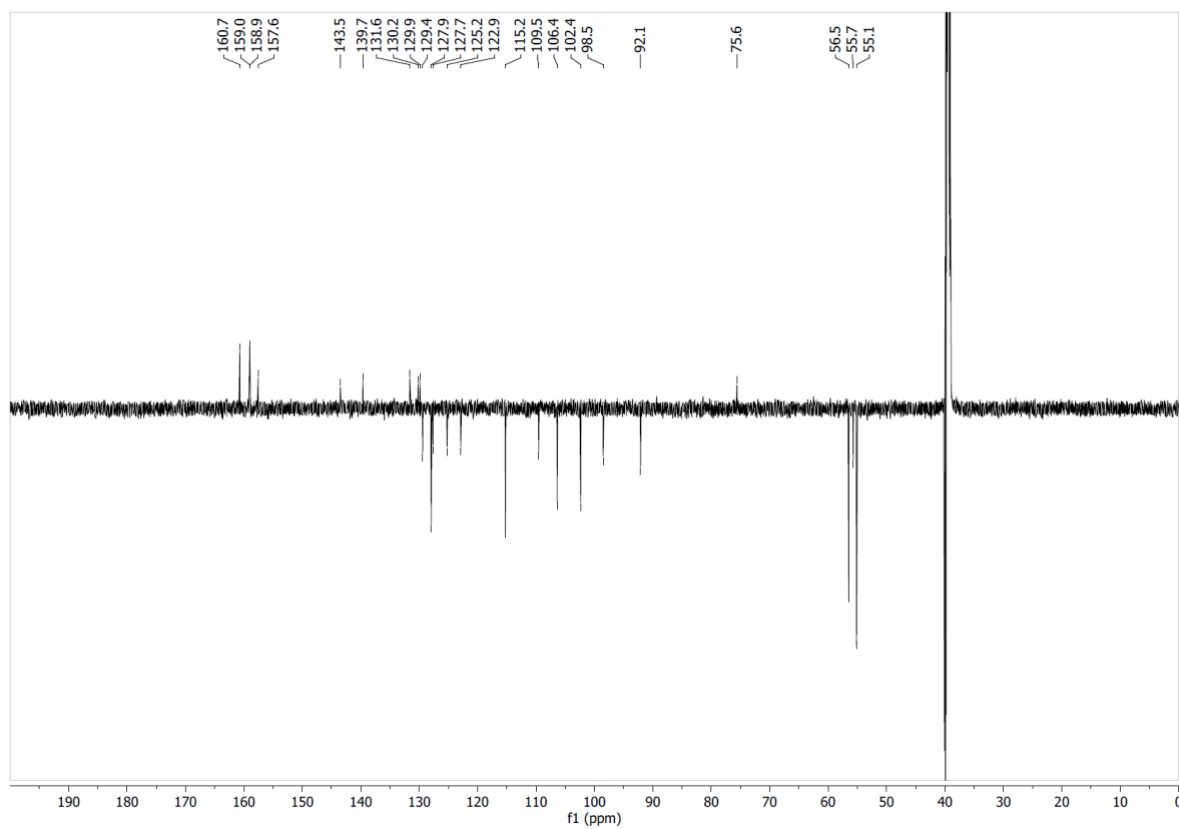

$^{13}\text{C}$ -DEPTQ NMR spectrum of compound **44** in  $\text{DMSO-}d_6$  at 151 MHz

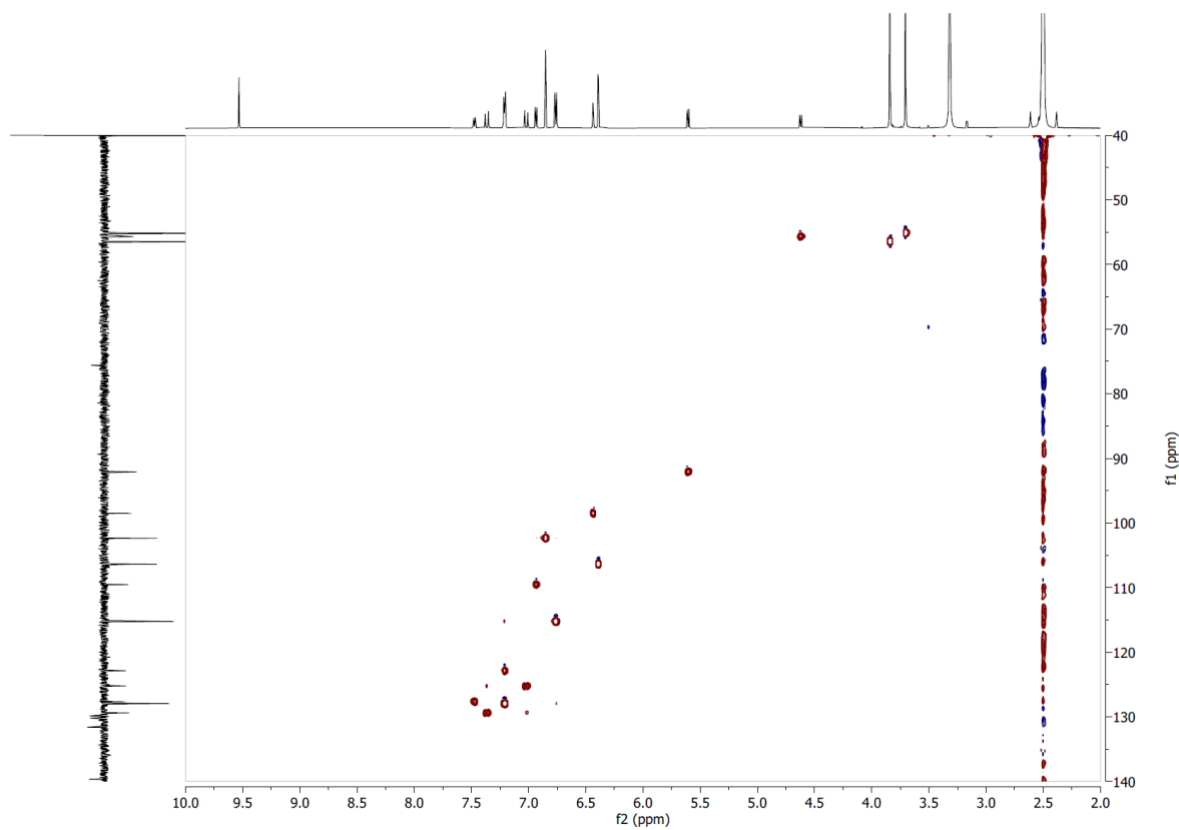

Edited HSQC NMR spectrum of compound **44** in  $\text{DMSO-}d_6$

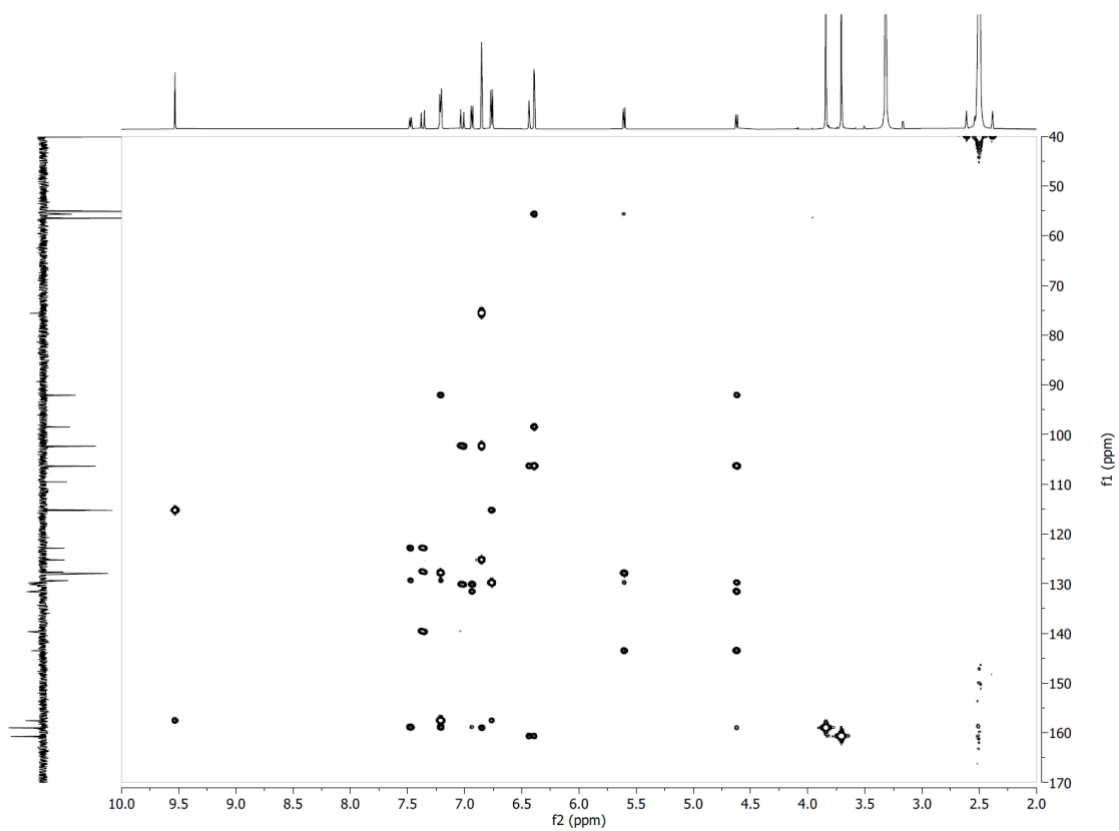

HMBC NMR spectrum of compound **44** in DMSO- $d_6$
